# Supplementary material for: Vegetation and fire regimes in the Neotropics over the last 21 000 years
Source: Copernicus journal article supplement (doi:10.5194/esd-16-1887-2025), 2025-10-29
Supplement: Supplementary file 1 [file Table S1.xlsx]

## Sheet: Site_info
Ref	Group	Site name	Elevation m.asl	Lon	Lat	Time range minimum (cal yr BP)	Time range maximum (cal yr BP)	Pollen data source	Charcoal data source	Publication
1	NNeo	Lake Tulane	38	-81.95	27.58	226	47565	Neotoma	Manually extracted	Watts, W. A. and Hansen, B. C. S.: Environments of Florida in the late Wisconsin and Holocene, in: Wet Site Archaeology, ed: Purdy, B. A., The Telford Press, Inc, 307–323, 1988.
2	NNeo	Scott Lake	51	-81.9433	27.964	-18	4527	Neotoma		Watts, W.A. 1971. Postglacial and interglacial vegetation history of southern Georgia and central Florida. Ecology 52(4):676-690. [DOI: 10.2307/1934159]
3	NNeo	Lake Tulane TFG	38	-81.95	27.58	879	51096		Reading Palaeofire	Grimm, E.C., Watts, W.A., Jacobson Jr., G.L., Hansen, B.C.S., Almquist, H.R., Dieffenbacher-Krall, A.C., 2006. Evidence for warm wet Heinrich events in Florida. Quaternary Science Reviews 25, 2197–2211.
4	NNeo	Lake Annie	33	-81.3516	27.2067	0	48642	Neotoma		Watts, W.A. 1975. A late Quaternary record of vegetation from Lake Annie, south-central Florida. Geology 3(6):344-346. [DOI: 10.1130/0091-7613(1975)3<344:ALQROV>2.0.CO;2]
5	NNeo	Little Salt Spring	5	-82.2333	27.075	-2	10310	Neotoma		Brown, J.G. 1981. Palynologic and petrographic analyses of bayhead hammock and marsh peats at Little Salt Spring archeological site (8So18), Florida. Master's thesis. University of South Carolina, Columbia, South Carolina, USA.
6	NNeo	SRM-1	12	-81.1144	25.39	45	6160		Neotoma	Yao, Q., K.-B. Liu, W.J. Platt, and V.H. Rivera-Monroy. 2015. Palynological reconstruction of environmental changes in coastal wetlands of the Florida Everglades since the mid-Holocene. Quaternary Research 83(3):449-458
7	NNeo	Laguna Herradura	5	-98.15	22.01	14	1801		Reading Palaeofire	Dull, R.A., Nevle, R.J., Woods, W.I., Bird, D.K., Avnery, S., Denevan, W.M., 2010. The Columbian Encounter and the Little Ice Age: abrupt land use change, fire, and greenhouse forcing. Annals of the Association of American Geographers 100, 755–771.
8	NNeo	Ría Lagartos-2	7	-88.0721	21.5794	-50	3912	Neotoma		Aragón-Moreno, A.A., G.A. Islebe, and N. Torrescano-Valle. 2012. A ~3800-yr, high-resolution record of vegetation and climate change on the north coast of the Yucatan Peninsula. Review of Palaeobotany and Palynology 178:35-42.
9	NNeo	Cenote San Jose Chulchaca	7	-90.1333	20.8667	-1	1896	Neotoma		Leyden, B.W., M. Brenner, T.J. Whitmore, J.H. Curtis, D.R. Piperno, and B.H. Dahlin. 1996. A record of long- and short-term climatic variation from northwest Yucatan: Cenote San Jose Chulchaca. Pages 30-50 in S.L. Fedick, editor. The Managed Mosaic: Ancient Maya Agriculture and Resource Use. University of Utah Press, Salt Lake City, Utah, USA.
10	NNeo	Cenote San Jose Chulchaca	7	-90.1333	20.8667	0	7193	Neotoma		Leyden, B. W.: Pollen evidence for climatic variability and cultural disturbance in the Maya Lowlands, Anc. Mesoamerica, 13, 85–101, https://doi.org/10.1017/S0956536102131099, 2002.
11	NNeo	Hoya Rincon de Parangueo	1772	-101.25	20.43	87	9836	Neotoma		Park, J. 2005. Holocene climate change and human environmental impacts in Guanajuato, Mexico. Doctoral dissertation. University of California Berkeley, Berkeley, California, USA.
12	NNeo	Hoya San Nicolás	1753	-101.257	20.3872	-48	11132	Neotoma		Park, J. 2005. Holocene climate change and human environmental impacts in Guanajuato, Mexico. Doctoral dissertation. University of California Berkeley, Berkeley, California, USA.
13	NNeo	Laguna Biajaca	56	-71.0865	19.5909	-65	1126	Neotoma		Castilla-Beltrán, A., H. Hooghiemstra, M.L.P. Hoogland, J. Pagán-Jiménez, B. van Geel, M.H. Field, M. Prins, T. Donders, E. Herrera Malatesta, J. Ulloa Hung, C.H. McMichael, W.D. Gosling, and C.L. Hofman. 2018. Columbusâ€™ footprint in Hispaniola: A paleoenvironmental record of indigenous and colonial impacts on the landscape of the central Cibao Valley, northern Dominican Republic. Anthropocene …
14	NNeo	Lake Patzcuaro	2056	-101.583	19.5833	-20	46640	Neotoma		Saporito, M.S. 1975. Chemical and mineral studies of a core from Lake Patzcuaro, Mexico. Master's thesis. University of Minnesota, Minneapolis, Minnesota, USA.
15	NNeo	Chalco Lake	2235	-99	19.5	45	19225	Neotoma		Lozano-García, M.S., B. Ortega-Guerrero, M. Caballero-Miranda, and J. Urrutia-Facugauchi. 1993. Late Pleistocene and Holocene Paleoenvironments of Chalco Lake, Central Mexico. Quaternary Research 40:332-342..
16	NNeo	Lake Tzib	15	-88.0701	19.2969	154	7736	Neotoma		Carrillo-Bastos, A., G.A. Islebe, N. Torrescano-Valle, and N.E. González. 2010. Holocene vegetation and climate history of central Quintana Roo, Yucatan Peninsula, Mexico. Review of Palaeobotany and Palynology 160:189-196.
17	Nneo	Lake Chignahuapan	2576	-99.53	19.16	1196	27090		Reading Palaeofire	Lozano-García, M. d.S., Sosa-Nájera, S., Sugiura, Y., Caballero, M., 2005. 23,000 yr of vegetation history of the Upper Lerma, a tropical high-altitude basin in Central Mexico. Quaternary Research 64, 70–82.
18	Nneo	Lake Aljojuca	2492	-97.5336	19.0911	53	6246		Reading Palaeofire	Bhattacharya, T., Byrne, R., 2016. Late Holocene anthropogenic and climatic influences on the regional vegetation of Mexico’s Cuenca Oriental. Global and Planetary Change 138, 56–69.
19	Nneo	Bao-1 1997	1948	-71.03	19.06	-47	3949		Reading Palaeofire	Kennedy, L.M., Horn, S.P., Orvis, K.H., 2006. A 4000-year record of fire and forest history from Valle de Bao, Cordillera Central, Dominican Republic. Palaeogeography, Palaeoclimatology, Palaeoecology 231, 279–290.
20	Nneo	Arrepentimientos	2207	-70.924	19.028	-61	6185	Neotoma		Crausbay, S.D., P.H. Martin, and E.F. Kelly. 2015. Tropical montane vegetation dynamics near the upper cloud belt strongly associated with a shifting ITCZ and fire. Journal of Ecology. v.103 (4), 891-903
21	NNeo	Castilla	848	-70.8761	18.7978	-50	2090		Reading Palaeofire	Lane, C.S., Horn, S.P., Mora, C.I., Orvis, K.H., 2009. Late-Holocene paleoenvironmental change at mid-elevation on the Caribbean slope of the Cordillera Central, Dominican Republic: a multi-site, multi-proxy analysis. Quaternary Science Reviews 28, 2239–2260.
22	NNeo	Salvador	848	-70.887	18.7958	-50	1811		Reading Palaeofire	Lane, C.S., Horn, S.P., Mora, C.I., Orvis, K.H., 2009. Late-Holocene paleoenvironmental change at mid-elevation on the Caribbean slope of the Cordillera Central, Dominican Republic: a multi-site, multi-proxy analysis. Quaternary Science Reviews 28, 2239–2260.
23	NNeo	Lago Catemaco	340	-95	18.66	-35	4892	Neotoma		Byrne, A.R., and S.P. Horn. 1989. Prehistoric agriculture and forest clearance in the Sierra de los Tuxtlas, Veracruz, Mexico. Palynology 13:181-193.
24	NNeo	Silvituc	60	-90.2857	18.626	-50	6326	Neotoma		Torrescano-Valle, N., and G.A. Islebe. 2015. Holocene paleoecology, climate history and human influence in the southwestern Yucatan Peninsula. Review of Palaeobotany and Palynology 217:1-8.
25	NNeo	Lago Verde	121	-95.34	18.61	-3	2302		Reading Palaeofire	Ortega, B., Caballero, M., Lozano-García, M. d.S, Vilaclara, G., Rodríguez, A., 2006. Rock magnetic and geochemical proxies for iron mineral diagenesis in a tropical lake: Lago Verde, Los Tuxtlas, East–Central Mexico. Earth and Planetary Science Letters 250, 444–458.
26	NNeo	Lake Miragoane	87	-73.05	18.4	-49	11901		Reading Palaeofire	Higuera-Gundy, A., Brenner, M., Hodell, D.A., Curtis, J.H., Leyden, B.W., Binford, M.W., 1999. A 10,300 14C yr record of climate and vegetation change from Haiti. Quaternary Research 52, 159–170.
27	NNeo	Laguna Pompal	749	-94.9557	18.376	49	4729	Neotoma	Reading Palaeofire	Goman, M., Byrne, R., 1998. A 5000-year record of agriculture and tropical forest clearance in the Tuxtlas, Veracruz, Mexico. The Holocene 8, 83–89.
28	NNeo	Lago Puerto Arturo	199	-90.1833	17.5333	-173	9601	Neotoma		Anderson, L., and D. Wahl. 2016. Two Holocene paleofire records from Peten, Guatemala: Implications for natural fire regime and prehispanic Maya land use. Global and Planetary Change 138:82-92.
29	NNeo	Laguna EkNaab	240	-89.2365	17.4211	818	1581		Reading Palaeofire	Wahl, D., Anderson, L., Estrada-Belli, F., Tokovinine, A., 2019. Palaeoenvironmental, epigraphic and archaeological evidence of total warfare among the Classic Maya. Nature Human Behaviour 3, 1049–1054.
30	NNeo	Lake Peten-Itza	155	-89.8719	16.9536	-8	87577	Neotoma		Correa-Metrio, A., M.B. Bush, K.R. Cabrera, S. Sully, M. Brenner, D.A. Hodell, J. Escobar, and T. Guilderson. 2012. Rapid climate change and no-analog vegetation in lowland Central America during the last 86,000 years. Quaternary Science Reviews 38:63-75.
31	NNeo	Lake Quexil	158	-89.8167	16.9167	8746	36282	Neotoma		Leyden, B.W. 1984. Guatemalan forest synthesis after Pleistocene aridity. Proceedings of the National Academy of Sciences USA 81:4856-4859.
32	NNeo	Cenote Kail	1765	-91.554	16	430	6126	Neotoma	Reading Palaeofire	Harvey, W.J., Nogué, S., Stansell, N., Petrokofsky, G., Steinman, B., Willis, K.J., 2019. The legacy of Pre–Columbian fire on the pine–oak forests of upland Guatemala. Frontiers in Forests and Global Change 2, 34.
33	NNeo	Aguada de Petapilla	752	-89.12	14.86	-4	4776		Reading Palaeofire	Rue, D., Webster, D., Traverse, A., 2002. Late Holocene fire and agriculture in the Copan Valley, Honduras. Ancient Mesoamerica 13, 267–272.
34	NNeo	Laguna Metapan	478	-89.4778	14.3007	4	1540		Reading Palaeofire	Dull, R.A., Nevle, R.J., Woods, W.I., Bird, D.K., Avnery, S., Denevan, W.M., 2010. The Columbian Encounter and the Little Ice Age: abrupt land use change, fire, and greenhouse forcing. Annals of the Association of American Geographers 100, 755–771.
35	Nneo	Iztapa	7	-90.6597	13.9519	11	3215		Reading Palaeofire	Larmon, J.T. 2013. The Pacific coast of Guatemala: a palynological investigation of climate change and human occupation. Master's thesis. Washington State University, Pullman, Washington, USA.
36	NNeo	Laguna Llana del Espino	746	-89.52	13.95	1	3069		Reading Palaeofire	Dull, R.A., 2004. A Holocene record of Neotropical savanna dynamics from El Salvador. Journal of Paleolimnology 32, 219–231.
37	NNeo	Charco Verde	56	-85.63	11.47	-43	1326		Reading Palaeofire	Avnery, S., Dull, R.A., Keitt, T.H., 2011. Human versus climatic influences on late-Holocene fire regimes in southwestern Nicaragua. The Holocene 21, 699–706.
38	NNeo	Cantarrana	50	-84	10.43	-41	3393		Reading Palaeofire	Kennedy, L.M., Horn, S.P., 2007. A late Holocene pollen and charcoal record from La Selva Biological Station, Costa Rica. Biotropica 40, 11–19.
39	NNeo	Lake Valencia	407	-67.7676	10.1658	-22	17559	Neotoma		Bradbury, J.P., B. Leyden, M. Salgado-Labouriau, W.M. Lewis, Jr., C. Schubert, M.W. Binford, D.G. Frey, D.R. Whitehead, and F.H. Weibezahn. 1981. Late Quaternary environmental history of Lake Valencia, Venezuela. Science 214(4527):1299-1305.
40	NNeo	La Chonta Bog	2314	-83.9431	9.68604	57	24808	Neotoma		Islebe, G.A., H. Hooghiemstra, and R. van 't Veer. 1996. Holocene vegetation and water level history in two bogs of the Cordillera de Talamanca, Costa Rica. Vegetatio 124(2):155-171.
41	-	Lago Chirripo	3460	-83.496	9.483	-35	5126		Reading Palaeofire	Horn, S.P., 1993. Postglacial vegetation and fire history in the Chirripó Páramo of Costa Rica. Quaternary Research 40, 107–116.
42	-	Lago de las Morrenas	3460	-83.48	9.48	24	11011		Reading Palaeofire	Horn, S.P., 1993. Postglacial vegetation and fire history in the Chirripó Páramo of Costa Rica. Quaternary Research 40, 107–116.
43	NNeo	Paramo de Piedras Blancas	1223	-70.8333	9.16667	0	1340	Neotoma		Rull, V., M.-L. Salgado-Labouriau, C. Schubert, and S. Valastro, Jr. 1987. Late Holocene temperature depression in the Venezuelan Andes: palynological evidence. Palaeogeography, Palaeoclimatology, Palaeoecology 60:109-121..
44	NNeo	Boquillas	13	-74.5625	9.12361	1415	11778	Neotoma		Berrío, J.C., A. Boom, P.J. Botero, L.F. Herrera, H. Hooghiemstra, F. Romero, and G. Sarmiento. 2001. Multi-disciplinary evidence of the Holocene history of a cultivated floodplain area in the wetlands of northern Colombia. Vegetation history and archaeobotany 10(3):161-174.
45	TrAn	Paramo de Miranda	3796	-70.8333	8.91667	312	15601	Neotoma		Salgado-Labouriau, M.-L. 1988. Sequence of colonization by plants in the Venezuelan Andes after the last Pleistocene glaciation. Journal of Palynology 23/24:189-204.
46	NNeo	Laguna Zoncho	1033	-82.96	8.81	-47	3018	Manually extracted	Reading Palaeofire	Clement, R.M., Horn, S.P., 2001. Pre-Columbian land-use history in Costa Rica: a 3000-year record of forest clearance, agriculture and fires from Laguna Zoncho. The Holocene 11, 419–426.
47	TrAn	Valle Laguna Victoria	3519	-70.7917	8.80833	0	12810	Neotoma		Graf, K DOI: 10.21233/n3h49g
48	TrAn	Valle Laguna Negra	3275	-70.7667	8.79167	0	3345	Neotoma		Graf, K DOI: 10.21233/n3mv1m
49	NNeo	Laguna Volcan	1138	-82.68	8.75	-25	2882		Reading Palaeofire	Behling, H., 2000. A 2860-year high-resolution pollen and charcoal record from the Cordillera de Talamanca in Panama: a history of human and volcanic forest disturbance. The Holocene 10, 387–393.
50	NNeo	Laguna Santa Elena	383	-82.56	8.56	0	1651		Reading Palaeofire	Anchukaitis, K.J., Horn, S.P., 2005. A 2000-year reconstruction of forest disturbance from southern Pacific Costa Rica. Palaeogeography, Palaeoclimatology, Palaeoecology 221, 35–54.
51	NNeo	Cana Swamp 1	260	-77.58	7.75	-49	4220		Reading Palaeofire	Bush, M.B., Colinvaux, P.A., 1994. Tropical forest disturbance: paleoecological records from Darien, Panama. Ecology 75, 1761–1768.
52	NNeo	Lake Wodehouse	458	-77.55	7.65	22	5339		Reading Palaeofire	Bush, M.B., Colinvaux, P.A., 1994. Tropical forest disturbance: paleoecological records from Darien, Panama. Ecology 75, 1761–1768.
53	Amazonia	GeoB16224-1	-2510	-52.0942	6.66056	4944	23068	Pangaea	Pangaea	Akabane et al., under review. Slowdown of ocean circulation increases the vulnerability of northern Amazon forests
54	TrAn	Laguna Ciega III	3385	-72.3909	6.47821	496	33234	Neotoma		van der Hammen, T., J. Barelds, H. de Jong, and A.A. de Veer. 1981. Glacial sequence and environmental history in the Sierra Nevada del Cocuy (Colombia). Palaeogeography, Palaeoclimatology, Palaeoecology 32:247-340.
55	TrAn	Laguna Ciega I	3385	-72.3909	6.47821	389	33827	Neotoma		van der Hammen, T., J. Barelds, H. de Jong, and A.A. de Veer. 1981. Glacial sequence and environmental history in the Sierra Nevada del Cocuy (Colombia). Palaeogeography, Palaeoclimatology, Palaeoecology 32:247-340.
56	TrAn	Llano Grande Mire	3455	-76.0926	6.47451	-51	17670	Neotoma		Velásquez-R., C.A., and H. Hooghiemstra. 2013. Pollen-based 17-kyr forest dynamics and climate change from the Western Cordillera of Colombia; no-analogue associations and temporarily lost biomes. Review of Palaeobotany and Palynology 194:38-49.
57	TrAn	Valle de Lagunillas VII	3950	-72.3464	6.38741	108	8053	Neotoma		Gonzalez, E., T. van der Hammen, and R.F. Flint. 1965. Late Quaternary glacial and vegetational sequence in Valle de Lagunillas, Sierra Nevada del Cocuy, Colombia. Leidse Geologische Mededelingen 32(1):157-182.
58	TrAn	Valle de Lagunillas VIII	3950	-72.3463	6.38712	104	11314	Neotoma		Gonzalez, E., T. van der Hammen, and R.F. Flint. 1965. Late Quaternary glacial and vegetational sequence in Valle de Lagunillas, Sierra Nevada del Cocuy, Colombia. Leidse Geologische Mededelingen 32(1):157-182.
59	TrAn	Valle de Lagunillas V	3950	-72.3375	6.37587	894	14814	Neotoma		Gonzalez, E., T. van der Hammen, and R.F. Flint. 1965. Late Quaternary glacial and vegetational sequence in Valle de Lagunillas, Sierra Nevada del Cocuy, Colombia. Leidse Geologische Mededelingen 32(1):157-182.	Neotoma (not used for Amazonia TRSH due to mangrove input)
60	TrAn	Valle de la Bocatoma XI	4363	-72.3324	6.36657	9541	13115	Neotoma		Gonzalez, E., T. van der Hammen, and R.F. Flint. 1965. Late Quaternary glacial and vegetational sequence in Valle de Lagunillas, Sierra Nevada del Cocuy, Colombia. Leidse Geologische Mededelingen 32(1):157-182.
61	TrAn	Valle de la Bocatoma IX	4363	-72.3255	6.36581	346	7840	Neotoma		Gonzalez, E., T. van der Hammen, and R.F. Flint. 1965. Late Quaternary glacial and vegetational sequence in Valle de Lagunillas, Sierra Nevada del Cocuy, Colombia. Leidse Geologische Mededelingen 32(1):157-182.
62	TrAn	Laguna de los Bobos	3324	-72.7667	6.22204	-8	8070	Neotoma		van der Hammen, T. 1962. Palinologia de la region de â€œLaguna de los Bobosâ€: Historia de su clima, vegetacion y agricultura durante los ultimos 5.000 años. Revista de la Academia Colombiana de Ciencias Exactas, Físicas y Naturales 11(44):359-361.
63	TrAn	Ciénaga del Visitador	3242	-72.793	6.17704	-2	17943	Neotoma		van der Hammen, T., and E. Gonzalez. 1965. A Late-glacial and Holocene pollen diagram from Cienaga del Visitador (Dept. Boyaca, Colombia). Leidse Geologische Mededelingen 32:193-201.
64	TrAn	Pantano de Vargas 1	2507	-73.0672	5.77789	1650	10895	Neotoma		Gómez, A., J.C. Berrío, H. Hooghiemstra, M. Becerra, and R. Marchant. 2007. A Holocene pollen record of vegetation change and human impact from Pantano de Vargas, an intra-Andean basin of Duitama, Colombia. Review of Palaeobotany and Palynology 145(1):143-157.
65	TrAn	Laguna de Fúquene	2615	-73.7532	5.45339	-13	45786	Neotoma		van Geel, B., and T. van der Hammen. 1973. Upper Quaternary vegetational and climatic sequence of the Fuquene area (Eastern Cordillera, Colombia). Palaeogeography, Palaeoclimatology, Palaeoecology 14(1):9-92.
66	-	Apakara	2303	-62.2261	5.32278	66	6674	Manually extracted	Manually extracted	Rull, V., Montoya, E., 2017. Holocene vegetation dynamics on the Apakará summit of the neotropical Guayana Highlands and potential environmental drivers. Rev. Palaeobot. Palynol. 240, 22–32.
67	TrAn	Páramo de Laguna Verde	3525	-74.004	5.21543	-30	6522	Neotoma		Kuhry, P. 1988. Palaeobotanical-palaeoecological studies of tropical high Andean peatbog sections (Cordillera Oriental, Colombia). Dissertationes Botanicae 116. J. Cramer, Berlin, Germany.
68	Amazonia	Leg155	-3410	-47.1	5.18	4217	49375	Manually extracted		Haberle, S.G., Maslin, M. a, 1999. Late Quaternary Vegetation and Climate Change in the Amazon Basin Based on a 50,000 Year Pollen Record from the Amazon Fan, ODP Site 932. Quat. Res. 51, 27–38
69	TrAn	Páramo de Peña Negra 1	3404	-74.1001	5.07352	-33	18754	Neotoma		Kuhry, P. 1988. Palaeobotanical-palaeoecological studies of tropical high Andean peatbog sections (Cordillera Oriental, Colombia). Dissertationes Botanicae 116. J. Cramer, Berlin, Germany.
70	TrAn	Páramo de Agua Blanca 3	2821	-74.1569	4.99445	26	8883	Neotoma		Kuhry, P. 1988. Palaeobotanical-palaeoecological studies of tropical high Andean peatbog sections (Cordillera Oriental, Colombia). Dissertationes Botanicae 116. J. Cramer, Berlin, Germany.
71	TrAn	Páramo de Agua Blanca 2	2821	-74.1569	4.99445	70	9197	Neotoma		Kuhry, P. 1988. Palaeobotanical-palaeoecological studies of tropical high Andean peatbog sections (Cordillera Oriental, Colombia). Dissertationes Botanicae 116. J. Cramer, Berlin, Germany.
72	TrAn	Páramo de Agua Blanca 1	2821	-74.1569	4.99445	-35	407474	Neotoma		Helmens, K.F. 1990. Neogene-Quaternary geology of the high plain of Bogotá, Eastern Cordillera, Colombia (stratigraphy, paleoenvironments and landscape evolution). Doctoral dissertation. University of Amsterdam, Amsterdam, The Netherlands.
73	-	Laguna Sardinas	101	-69.5217	4.96992	-49	13860	Neotoma		Behling, H., and H. Hooghiemstra. 1998. Late Quaternary palaeoecology and palaeoclimatology from pollen records of the savannas of the Llanos Orientales in Colombia. Palaeogeography, Palaeoclimatology, Palaeoecology 139(3-4):251-267.
74	TrAn	Rosarito	3469	-75.2296	4.90185	1588	30193	Neotoma		van der Hammen, T., A.M. Cleef, and G.W. Noldus. 1995. A palynological record of the Rosarito pedo-tephro stratigraphical sequence (Central Cordillera, Colombia): vegetational history of the last 35,000 years. Pages 431-440 in T. van der Hammen and A.G. dos Santos, editors. La Cordillera Central Colombiana transecto Parque Los Nevados (tercera parte). Studies on tropical Andean ecosystems/Estudio…
75	TrAn	Laguna de la Herrera	2593	-74.2782	4.69603	-2	6002	Neotoma		van der Hammen, T., and E. Gonzalez. 1965. A pollen diagram from "Laguna de la Herrera" (Sabana de Bogota). Leidse Geologische Mededelingen 32(1):183-191.
76	-	Laguna El Piñal	156	-71.4563	4.65877	894	22504	Neotoma		Behling, H., and H. Hooghiemstra. 1999. Environmental history of the Colombian savannas of the Llanos Oriantales since the Last Glacial Maximum from lake records El Pinal and Carimagua. Journal of Paleolimnology 21(4):461-476.
77	-	Laguna Chenevo	161	-71.4412	4.59319	-53	8296	Neotoma		Berrío Mogollón, J.C. 2002. Doctoral dissertation. Amsterdam, The Netherlands.
78	-	Laguna Carimagua-Bosque	168	-71.3276	4.5861	-49	1170	Neotoma		Berrio, J.C., H. Hooghiemstra, H. Behling, and K. van der Borg. 2000. Late Holocene history of savanna gallery forest from Carimagua area, Colombia. Review of Palaeobotany and Palynology 111(3-4):295-308.
79	-	Laguna Carimagua	170	-71.3324	4.57646	1175	9478	Neotoma		Behling, H., and H. Hooghiemstra. 1999. Environmental history of the Colombian savannas of the Llanos Oriantales since the Last Glacial Maximum from lake records El Pinal and Carimagua. Journal of Paleolimnology 21(4):461-476.
80	-	Laguna Angel	181	-70.5392	4.44909	-49	11864	Neotoma		Behling, H., and H. Hooghiemstra. 1998. Late Quaternary palaeoecology and palaeoclimatology from pollen records of the savannas of the Llanos Orientales in Colombia. Palaeogeography, Palaeoclimatology, Palaeoecology 139(3-4):251-267.
81	TrAn	Andabobos	3835	-74.2514	4.09922	408	18589	Neotoma		Melief, A.B.M. 1985. Late Quaternary paleoecology of the Parque Nacional Natural los Nevados (Cordillera Central) and Sumapaz (Cordillera Oriental) areas, Colombia. Doctoral dissertation. Universiteit van Amsterdam, Amsterdam, The Netherlands.
82	TrAn	Cuchilla La Rabona	3882	-74.25	4	-23	8089	Neotoma		Melief, A.B.M. 1985. Late Quaternary paleoecology of the Parque Nacional Natural los Nevados (Cordillera Central) and Sumapaz (Cordillera Oriental) areas, Colombia. Doctoral dissertation. Universiteit van Amsterdam, Amsterdam, The Netherlands.
83	TrAn	Laguna La Primavera	3709	-74.1586	3.98138	10521	13399	Neotoma		Melief, A.B.M. 1985. Late Quaternary paleoecology of the Parque Nacional Natural los Nevados (Cordillera Central) and Sumapaz (Cordillera Oriental) areas, Colombia. Doctoral dissertation. Universiteit van Amsterdam, Amsterdam, The Netherlands.
84	TrAn	Laguna La Primavera	3709	-74.1586	3.98138	19	8175	Neotoma		Melief, A.B.M. 1985. Late Quaternary paleoecology of the Parque Nacional Natural los Nevados (Cordillera Central) and Sumapaz (Cordillera Oriental) areas, Colombia. Doctoral dissertation. Universiteit van Amsterdam, Amsterdam, The Netherlands.
85	TrAn	Laguna Negra de Alsacia	3539	-74.0932	3.96595	1894	32122	Neotoma		Melief, A.B.M. 1985. Late Quaternary paleoecology of the Parque Nacional Natural los Nevados (Cordillera Central) and Sumapaz (Cordillera Oriental) areas, Colombia. Doctoral dissertation. Universiteit van Amsterdam, Amsterdam, The Netherlands.
86	-	Laguna Mozambique	187	-73.0544	3.95414	-20	3872	Neotoma		Berrío Mogollón, J.C. 2002. Doctoral dissertation. Amsterdam, The Netherlands.
87	TrAn	Laguna Gobernador	3659	-74.3	3.95295	-26	12921	Neotoma		Melief, A.B.M. 1985. Late Quaternary paleoecology of the Parque Nacional Natural los Nevados (Cordillera Central) and Sumapaz (Cordillera Oriental) areas, Colombia. Doctoral dissertation. Universiteit van Amsterdam, Amsterdam, The Netherlands.
88	TrAn	Laguna La Guitarra	3656	-74.1605	3.95275	140	19192	Neotoma		Melief, A.B.M. 1985. Late Quaternary paleoecology of the Parque Nacional Natural los Nevados (Cordillera Central) and Sumapaz (Cordillera Oriental) areas, Colombia. Doctoral dissertation. Universiteit van Amsterdam, Amsterdam, The Netherlands.
89	Amazonia	Caracanã	112	-59.8	3.85	10071	49460		Manually extracted	Cordeiro, R.C., Turcq, B., Moreira, L.S., Rodrigues, R. de A.R., Lamego Simões Filho, F.F., Martins, G.S., Santos, A.B., Barbosa, M., Guilles da Conceição, M.C., Rodrigues, R. de C., Evangelista, H., Moreira-Turcq, P., Penido, Y.P., Sifeddine, A., Seoane, J.C.S., 2014. Palaeofires in Amazon: Interplay between land use change and palaeoclimatic events. Palaeogeogr. Palaeoclimatol. Palaeoecol. 415,…
90	Amazonia	Serra do Tepequem	522	-61.7043	3.79201	5129	7485	Neotoma	Reading Palaeofire	Rodríguez-Zorro, P.A., M.L. Costa, and H. Behling. 2017. Mid-Holocene vegetation dynamics with an early expansion of Mauritia flexuosa palm trees inferred from the Serra do Tepequém in the savannas of Roraima State in Amazonia, northwestern Brazil. Vegetation History and Archaeobotany 26(5):455-468.
91	Amazonia	Laguna Las Margaritas	262	-73.4165	3.36626	632	11100	Neotoma	Reading Palaeofire	Wille, M., H. Hooghiemstra, B. van Geel, H. Behling, A. de Jong, and K. van der Borg. 2003. Submillennium-scale migrations of the rainforestâ€“savanna boundary in Colombia: 14C wiggle-matching and pollen analysis of core Las Margaritas. Palaeogeography, Palaeoclimatology, Palaeoecology 193(2):201-223.
92	Amazonia	Laguna Loma Linda	244	-73.3631	3.30131	76	10206	Neotoma		Behling, H., and H. Hooghiemstra. 2000. Holocene Amazon rainforestâ€“savanna dynamics and climatic implications: high-resolution pollen record from Laguna Loma Linda in eastern Colombia. Journal of Quaternary Science 15(7):687-695.
93	-	Quilichao	978	-76.51	3.1	-52	14547	Neotoma	Reading Palaeofire	Berrío, J.C., Hooghiemstra, H., Marchant, R., Rangel, O., 2002. Late-glacial and Holocene history of the dry forest area in the south Colombian Cauca Valley. Journal of Quaternary Science 17, 667–682.
94	-	La Teta-2	995	-76.5333	3.0833	-50	10337	Neotoma		Berrío Mogollón, J.C. 2002. Doctoral dissertation. Amsterdam, The Netherlands.
95	-	La-Teta	995	-76.53	3.08	0	9687		Reading Palaeofire	Berrío, J.C., Hooghiemstra, H., Marchant, R., Rangel, O., 2002. Late-glacial and Holocene history of the dry forest area in the south Colombian Cauca Valley. Journal of Quaternary Science 17, 667–682.
96	-	Pantano de Genagra	1748	-76.6065	2.47442	-28	52000	Neotoma		Wille, M., H. Hooghiemstra, H. Behling, K. van der Borg, and A.J. Negret. 2001. Environmental change in the Colombian subandean forest belt from 8 pollen records: the last 50 kyr. Vegetation History and Archaeobotany 10(2):61-77.
97	-	Piagua	1700	-76.7806	2.43268	-50	21911	Neotoma		Wille, M., H. Hooghiemstra, H. Behling, K. van der Borg, and A.J. Negret. 2001. Environmental change in the Colombian subandean forest belt from 8 pollen records: the last 50 kyr. Vegetation History and Archaeobotany 10(2):61-77.
98	-	Rio Timbio	1773	-76.7094	2.36575	136	32512	Neotoma		Wille, M. 2001. Vegetation history and climate records of Colombian lowland areas: rain forest, savanna and intermontane ecosystems. Doctoral dissertation. University of Amsterdam, Amsterdam, The Netherlands.
99	-	Potrerillo-2	642	-77.0542	2.10005	0	9463	Neotoma		González-Carranza, Z., J.C. Berrío, H. Hooghiemstra, J.F. Duivenvoorden, and H. Behling. 2008. Changes of seasonally dry forest in the Colombian Patía Valley during the early and middle Holocene and the development of a dry climatic record for the northernmost Andes. Review of Palaeobotany and Palynology 152(1-2):1-10.
100	-	El Patia	1000	-77	2.03	0	9675	Neotoma	Reading Palaeofire	Vélez, M.I., Berrío, J.C., Hooghiemstra, H., Metcalfe, S., Marchant, R., 2005. Palaeoenvironmental changes during the last ca. 8590 calibrated yr (7800 radiocarbon yr) in the dry forest ecosystem of the Patía Valley, Southern Colombian Andes: a multiproxy approach. Palaeogeography, Palaeoclimatology, Palaeoecology 216, 279–302.
101	-	El Patía-1	600	-77.1207	2.00948	-53	9899	Neotoma		Vélez, M.I., J.C. Berrio, H. Hooghiemstra, S. Metcalfe, and R. Marchant. 2005. Palaeoenvironmental changes during the last ca. 8590 calibrated yr (7800 radiocarbon yr) in the dry forest ecosystem of the Patía Valley, Southern Colombian Andes: a multiproxy approach. Palaeogeography, Palaeoclimatology, Palaeoecology 216(3-4):279-302.
102	-	Laguna Piusbi [Laguna El Trueno]	126	-77.9323	1.88174	-240	6147	Neotoma		Behling, H., H. Hooghiemstra, and A.J. Negret. 1998. Holocene history of the Chocó rain forest from Laguna Piusbi, southern Pacific Lowlands of Colombia. Quaternary Research 50(3):300-308.
103	NEB	GeoB16205-4	-4282	-43.1	1.35139	10013	13062	Pangaea	Pangaea	Bouimetarhan, I., Chiessi, C.M., González-Arango, C., Dupont, L., Voigt, I., Prange, M., Zonneveld, K., 2018. Intermittent development of forest corridors in northeastern Brazil during the last deglaciation: Climatic and ecologic evidence. Quat. Sci. Rev. 192, 86–96.
104	TrAn	Laguna De La Cocha	2824	-77.1585	1.06608	-57	3782	Neotoma	Neotoma	Epping, I. 2009. Environmental change in the Colombian upper forest belt. Master's thesis. University of Amsterdam, Amsterdam, The Netherlands.
105	Amazonia	Lake Pata 2	165	-66.6767	0.28602	-59	7593	Neotoma		Nascimento, M.N., G.S. Martins, R.C. Cordeiro, B. Turcq, L.S. Moreira, and M.B. Bush. 2019. Vegetation response to climatic changes in western Amazonia over the last 7,600 years. Journal of Biogeography 46:2389-2406.
106	Amazonia	Lake Pata	165	-66.6767	0.28602	-3	25329	Neotoma		Colinvaux, P.A., P.E. De Oliveira, J.E. Moreno, M.C. Miller, and M.B. Bush. 1996. A long pollen record from lowland Amazonia: forest and cooling in glacial times. Science 274:85-88.
107	Amazonia	Lake Pata	88	-66.06	0.26	455	48202		Reading Palaeofire	Bush, M.B., de Oliveira, P.E., 2006. The rise and fall of the Refugial Hypothesis of Amazonian speciation: a paleoecological perspective. Biota Neotropica 6.
108	TrAn	Mojanda	3748	-78.25	0.13	-60	3400	Neotoma	Neotoma	Villota, A., H. Behling, and S. León-Yánez. 2017. Three millennia of vegetation and environmental dynamics in the Lagunas de Mojanda region, northern Ecuador. Acta Palaeobotanica 57:407-421. 10.1515/acpa-2017-0016.
109	TrAn	Cayambe	3978	-78.0333	-0.03333	360	6224	Neotoma		Graf, K. 1992. Pollendiagramme aus den Anden: Eine Synthese zur Klimageschichte und Vegetationsentwicklung seit der letzten Eiszeit. Physische Geographie 34. Universität Zürich-Irchel, Geographisches Institut, Zürich, Switzerland.
110	Amazonia	Lake Acarabixi	46	-64.4989	-0.34583	776	10886	Neotoma	Reading Palaeofire	Rodríguez-Zorro, P.A., B. Turcq, R.C. Cordeiro, L.S. Moreira, R.L. Costa, C.H. McMichael, and H. Behling. 2018. Forest stability during the early and late Holocene in the igapó floodplains of the Rio Negro, northwestern Brazil. Quaternary Research 89(1):75-89.
111	TrAn	Lake Huila	2661	-78.0179	-0.42342	-63	670	Neotoma		Loughlin, N.J.D. 2018. Changing human impact on the montane forests of the eastern Andean flank, Ecuador. Doctoral dissertation. The Open University, Milton Keynes, United Kingdom.
112	Amazonia	Quebrada del Amor	194	-72.3996	-0.602128	-58	154	Neotoma		Berrío, J.C., M.V. Arbeláez, J.F. Duivenvoorden, A.M. Cleef, and H. Hooghiemstra. 2003. Pollen representation and successional vegetation change on the sandstone plateau of Araracuara, Colombian Amazonia. Review of Palaeobotany and Palynology 126(3-4):163-181.
113	Amazonia	Lago Crispim	12	-47.64	-0.62	-19	8487		Reading Palaeofire	Behling, H., da Costa, M.L., 2001. Holocene vegetational and coastal environmental changes from the Lago Crispim record in northeastern Pará State, eastern Amazonia. Review of Palaeobotany and Palynology 114, 145–155.
114	Amazonia	Maxus-Core 5	250	-76.45	-0.7	-50	42750	Neotoma	Reading Palaeofire	Athens, J.S., Ward, J.V., 1999. The Late Quaternary of the Western Amazon: climate, vegetation and humans. Antiquity 73, 287–302.
115	Amazonia	Pantano de Mônica 1	128	-72.0517	-0.7003	4023	15329	Neotoma		Behling, H., J.C. Berrio, and H. Hooghiemstra. 1999. Late Quaternary pollen records from the middle Caquetá river basin in central Colombian Amazon. Palaeogeography, Palaeoclimatology, Palaeoecology 135(1-3):193-213.
116	Amazonia	Pantano de Mônica 3	128	-72.0557	-0.70373	-48	3803	Neotoma		Behling, H., J.C. Berrio, and H. Hooghiemstra. 1999. Late Quaternary pollen records from the middle Caquetá river basin in central Colombian Amazon. Palaeogeography, Palaeoclimatology, Palaeoecology 135(1-3):193-213.
117	Amazonia	Pantano de Mônica 2	128	-72.0596	-0.706	-51	4481	Neotoma		Behling, H., J.C. Berrio, and H. Hooghiemstra. 1999. Late Quaternary pollen records from the middle Caquetá river basin in central Colombian Amazon. Palaeogeography, Palaeoclimatology, Palaeoecology 135(1-3):193-213.
118	Amazonia	Lagoa da Curuca	21	-47.85	-0.76667	0	10750	Neotoma	Reading Palaeofire	Behling, H. 1996. First report on new evidence for the occurrence of Podocarpus and possible human presence at the mouth of the Amazon during the Late-glacial. Vegetation History and Archaeobotany 5:241-246.
119	TrAn	Anteojos Valley	3984	-78.4066	-0.9657	-53	3946	Neotoma	Neotoma	Villota, A., S. León-Yánez, and H. Behling. 2015. Mid- and late Holocene vegetation and environmental dynamics in the Llanganates National Park, Anteojos Valley, central Ecuadorian Andes. Palynology 39(3):350-361. [DOI: http://dx.doi.org/10.1080/01916122.2014.977404]
120	Amazonia	Santa Maria	57	-53.6	-1.57	15	9041		Reading Palaeofire	Bush, M.B., Silman, M.R., de Toledo, M.B., Listopad, C., Gosling, W.D., Williams, C., de Oliveira, P.E., Krisel, C., 2007. Holocene fire and occupation in Amazonia: records from two lake districts. Philosophical Transactions of the Royal Society B: Biological Sciences 362, 209–218.
121	Amazonia	Comprida	170	-53.99	-1.62	656	10613		Reading Palaeofire	Bush, M.B., Miller, M.C., de Oliveira, P.E., Colinvaux, P.A., 2000. Two histories of environmental change and human disturbance in eastern lowland Amazonia. The Holocene 10, 543–553.
122	Amazonia	Geral C	34	-53.59	-1.64	66	8265		Reading Palaeofire	Bush, M.B., Miller, M.C., de Oliveira, P.E., Colinvaux, P.A., 2000. Two histories of environmental change and human disturbance in eastern lowland Amazonia. The Holocene 10, 543–553.
123	Amazonia	Saracuri	31	-53.57	-1.67	8	8487		Reading Palaeofire	Bush, M.B., Silman, M.R., de Toledo, M.B., Listopad, C., Gosling, W.D., Williams, C., de Oliveira, P.E., Krisel, C., 2007. Holocene fire and occupation in Amazonia: records from two lake districts. Philosophical Transactions of the Royal Society B: Biological Sciences 362, 209–218.
124	Amazonia	Rio Curua	36	-51.45	-1.73	0	8751		Reading Palaeofire	Behling, H., da Costa, M.L., 2000. Holocene environmental changes from the Rio Curuá record in the Caxiuanã region, eastern Amazon Basin. Quaternary Research 53, 369–377.
125	TrAn	Laguna Pallcacocha	3918	-79.16	-2.75	9675	14682	Neotoma	Reading Palaeofire	Hansen, B.C.S., Rodbell, D.T., Seltzer, G.O., León, B., Young, K.R., Abbott, M., 2003. Late-glacial and Holocene vegetational history from two sites in the western Cordillera of southwestern Ecuador. Palaeogeography, Palaeoclimatology, Palaeoecology 194, 79–108.
126	TrAn	Laguna Chorreras	3918	-79.1606	-2.77057	-45	19561	Neotoma	Reading Palaeofire	Hansen, B.C.S., D.T. Rodbell, G.O. Seltzer, B. León, K.R. Young, and M. Abbott. 2003. Late-glacial and Holocene vegetational history from two sites in the western Cordillera of southwestern Ecuador. Palaeogeography, Palaeoclimatology, Palaeoecology 194(1-3):79-108.
127	Amazonia	Lake Caranã	74	-55.04	-2.83	-61	8608	Neotoma	Reading Palaeofire	Maezumi, S.Y., Robinson, M., de Souza, J., Urrego, D.H., Schaan, D., Alves, D., Iriarte, J., 2018. New insights from Pre-Columbian land use and fire management in Amazonian dark earth forests. Frontiers in Ecology and Evolution 6.
128	Amazonia	Lake Kumpaka	477	-77.9621	-2.83663	-66	2544	Neotoma		Åkesson, C.M., C.N.H. McMichael, M.F. Raczka, S.N. Huisman, M. Palmeira, J. Vogel, D. Neill, J. Veizaj, and M.B. Bush. 2021. Long-term ecological legacies in western Amazonia. Journal of Ecology.
129	TrAn	Llaviucu	3519	-79.1461	-2.84278	-60	12848	Neotoma		Nascimento, M.N., N.A.S. Mosblech, M.F. Raczka, S. Baskin, K.E. Manrique, J. Wilger, L. Giosan, X. Benito, and M.B. Bush. 2020. The adoption of agropastoralism and increased ENSO frequency in the Andes. Quaternary Science Reviews 243:106471.
130	NEB	Caco MA97-1	84	-43.2678	-2.97022	1	22075	Manually extracted	Reading Palaeofire	Ledru, M.-P., Ceccantini, G., Marques Gouveia, S.E., López-Sáez, J.A., Ruiz Pessenda, L.C., de Souza Ribeiro, A., 2006. Millenial-scale climatic and vegetation changes in a northern Cerrado (Northeast, Brazil) since the Last Glacial Maximum. Quaternary Science Reviews 25, 1110–1126.
131	Amazonia	Surucucho	386	-78	-3.06	386	21358		Reading Palaeofire	Colinvaux, P.A., Bush, M.B., Steinitz-Kannan, M., Miller, M.C., 1997. Glacial and postglacial pollen records from the Ecuadorian Andes and Amazon. Quaternary Research 48, 69–78.
132	Amazonia	Lago Formoso	17	-45.3861	-3.25389	503	7799		Neotoma	Alves de Moraes, Caio; Lima da Costa, Marcondes; Guida Navarro, Alexandre; Nunes da Silva Meneses, Maria Ecilene; Boiadeiro Ayres Negrão, Leonardo; Pöllmann, Herbert; Behling, Hermann (2021): Holocene coastal environmental changes inferred by multi-proxy analysis from Lago Formoso sediments in Maranhão State, northeastern Brazil. Quaternary Science Reviews, 273, 107234
133	NEB	GeoB 3104-1	-1431	-37.575	-3.66694	9897	49073	Manually extracted		Behling, H., W. Arz, H., Pätzold, J., Wefer, G., 2000. Late Quaternary vegetational and climate dynamics in northeastern Brazil, inferences from marine core GeoB 3104-1. Quat. Sci. Rev. 19, 981–994.
134	TrAn	El Tiro Bog	2265	-79.14	-3.84	44	20000		Reading Palaeofire	Niemann, H., Behling, H., 2008. Late Quaternary vegetation, climate and fire dynamics inferred from the El Tiro record in the southeastern Ecuadorian Andes. Journal of Quaternary Science 23, 203–212.
135	NEB	Maranguape	483	-38.7202	-3.89619	932	5361	Neotoma		Montade, V., M.-P. Ledru, J. Burte, E.S.P.R. Martins, C.F. Verola, I.R.d. Costa, and F.H. Magalhães e Silva. 2014. Stability of a Neotropical microrefugium during climatic instability. Journal of Biogeography 41(6):1215-1226.
136	TrAn	Laguna Zurita	2336	-79.1176	-3.97467	-65	1165	Neotoma	Reading Palaeofire	Niemann, H., and H. Behling. 2010. Late Holocene environmental change and human impact inferred from three soil monoliths and the Laguna Zurita multi-proxi record in the southeastern Ecuadorian Andes. Vegetation History Archaeobotany 19:1-15.
137	TrAn	ECSF Refugio	2260	-79.0736	-3.975	407	843		Reading Palaeofire	Niemann, H., Behling, H., 2009. Late Holocene environmental change and human impact inferred from three soil monoliths and the Laguna Zurita multi-proxi record in the southeastern Ecuadorian Andes. Vegetation History and Archaeobotany 19, 1–15.
138	TrAn	EL Tiro-Pass	2617	-79.1452	-3.98978	143	19929	Neotoma	Neotoma	Niemann, H., and H. Behling. 2008. Late Quaternary vegetation, climate and fire dynamics inferred from the El Tiro record in the southeastern Ecuadorian Andes. Journal of Quaternary Science 23:203-212.
139	TrAn	Estacíon Científica SF Cerro de Consuelo	2738	-79.0596	-4.00244	636	1402	Neotoma		Niemann, H., and H. Behling. 2010. Late Holocene environmental change and human impact inferred from three soil monoliths and the Laguna Zurita multi-proxi record in the southeastern Ecuadorian Andes. Vegetation History Archaeobotany 19:1-15.
140	TrAn	ECSF Cerro de Consuelo	2738	-79.0596	-4.00244	503	1435		Reading Palaeofire	Niemann, H., Behling, H., 2009. Late Holocene environmental change and human impact inferred from three soil monoliths and the Laguna Zurita multi-proxi record in the southeastern Ecuadorian Andes. Vegetation History and Archaeobotany 19, 1–15.
141	TrAn	Cocha Caranga Mire	2710	-79.1626	-4.04382	-15	1647	Neotoma	Reading Palaeofire	Niemann, H., Behling, H., 2009. Late Pleistocene and Holocene environmental change inferred from the Cocha Caranga sediment and soil records in the southeastern Ecuadorian Andes. Palaeogeography, Palaeoclimatology, Palaeoecology 276, 1–14.
142	TrAn	Laguna Cocha Caranga	2710	-79.1596	-4.04586	-55	13552	Neotoma	Reading Palaeofire	Niemann, H., Behling, H., 2009. Late Pleistocene and Holocene environmental change inferred from the Cocha Caranga sediment and soil records in the southeastern Ecuadorian Andes. Palaeogeography, Palaeoclimatology, Palaeoecology 276, 1–14.
143	TrAn	Cocha Caranga Forest	2700	-79.1596	-4.04586	-55	109	Neotoma		Niemann, H., Behling, H., 2009. Late Pleistocene and Holocene environmental change inferred from the Cocha Caranga sediment and soil records in the southeastern Ecuadorian Andes. Palaeogeography, Palaeoclimatology, Palaeoecology 276, 1–14.
144	Amazonia	San Jorge	105	-73.195	-4.06333	-41	2437	Neotoma		Kelly, T.J., I.T. Lawson, K.H. Roucoux, T.R. Baker, T.D. Jones, and N.K. Sanderson. 2017. The vegetation history of an Amazonian domed peathland. Palaeogeography, Palaeoclimatology, Palaeoecology 468:129-141.
145	TrAn	Valle Pequeño	2501	-79.1721	-4.11608	-57	1633	Neotoma		Rodríguez, F. 2012. Reconstruction of Late Quaternary landscape dynamics in the Podocarpus National Park region, southern Andes of Ecuador. Doctoral dissertation. Georg August University, GÃ¶ttingen, Germany.
146	TrAn	Valle Pequeno	2501	-79.1721	-4.11608	-29	1558		Reading Palaeofire	Rodríguez, F., Behling, H., 2010. Late Holocene vegetation, fire, climate and upper forest line dynamics in the Podocarpus National Park, southeastern Ecuador. Vegetation History and Archaeobotany 20, 1–14.
147	TrAn	Cajanuma valley	2985	-79.1569	-4.14972	-62	18124	Neotoma		Villota, A., and H. Behling. 2014. Late Glacial and Holocene environmental change inferred from the páramo of Cajanuma in the Podocarpus National Park, southern Ecuador. Caldasia 36(2):345-364.
148	NEB	GeoB 3910-2	-2337	-36.3503	-4.25028	12260	19630	Pangaea		Dupont, L.M., Schlütz, F., Ewah, C.T., Jennerjahn, T.C., Paul, A., Behling, H., 2009. Two-step vegetation response to enhanced precipitation in Northeast Brazil during Heinrich event 1. Glob. Chang. Biol. 16, 1647–1660.
149	TrAn	Laguna Rabadilla de Vaca	3355	-79.1121	-4.25547	204	11140	Neotoma	Reading Palaeofire	Niemann, H., Haberzettl, T., Behling, H., 2009. Holocene climate variability and vegetation dynamics inferred from the (11700 cal. yr BP) Laguna Rabadilla de Vaca sediment record, southeastern Ecuadorian Andes. The Holocene 19, 307–316.
150	TrAn	Rabadilla de Vaca mire	3355	-79.1209	-4.25658	-55	2053.03	Neotoma		Rodríguez, F., and H. Behling. 2011. Late Holocene vegetation, fire, climate and upper forest line dynamics in the Podocarpus National Park, southeastern Ecuador. Vegetation History and Archaeobotany 20:1-14.
151	TrAn	Rabadilla de Vaca mire	3355	-79.1209	-4.25658	-14	1958		Reading Palaeofire	Rodríguez, F., Behling, H., 2010. Late Holocene vegetation, fire, climate and upper forest line dynamics in the Podocarpus National Park, southeastern Ecuador. Vegetation History and Archaeobotany 20, 1–14.
152	TrAn	Cerro Toledo CTB	2990	-79.1115	-4.37461	-103	18086	Neotoma	Reading Palaeofire	Brunschön, C., Behling, H., 2009. Late Quaternary vegetation, fire and climate history reconstructed from two cores at Cerro Toledo, Podocarpus National Park, southeastern Ecuadorian Andes. Quaternary Research 72, 388–399.
153	TrAn	Cerro Toledo	2990	-79.1115	-4.37461	74	6272	Neotoma	Reading Palaeofire	Rodríguez, F., Behling, H., 2012. Late Quaternary vegetation, climate and fire dynamics, and evidence of early to mid-Holocene Polylepis forests in the Jimbura region of the southernmost Ecuadorian Andes. Palaeogeography, Palaeoclimatology, Palaeoecology 350-352, 247–257.
154	TrAn	Lagunas Natosas Bosque	3458	-79.4241	-4.73042	54	14355	Neotoma	Reading Palaeofire	Rodríguez, F., Behling, H., 2012. Late Quaternary vegetation, climate and fire dynamics, and evidence of early to mid-Holocene Polylepis forests in the Jimbura region of the southernmost Ecuadorian Andes. Palaeogeography, Palaeoclimatology, Palaeoecology 350-352, 247–257.
155	Amazonia	Carajas	355	-50.16	-6	12	7747		Reading Palaeofire	Cordeiro, R.C., Turcq, B., Suguio, K., Oliveira da Silva, A., Sifeddine, A., Volkmer-Ribeiro, C., 2008. Holocene fires in East Amazonia (Carajás), new evidences, chronology and relation with paleoclimate. Global and Planetary Change 61, 49–62.
156	Amazonia	Carajas	643	-50.34	-6.33	58	54923	Manually extracted	Manually extracted	Hermanowski, B., da Costa, M.L., Carvalho, A.T., Behling, H., 2012. Palaeoenvironmental dynamics and underlying climatic changes in southeast Amazonia (Serra Sul dos Carajás, Brazil) during the late Pleistocene and Holocene. Palaeogeogr. Palaeoclimatol. Palaeoecol. 365–366, 227–246.
157	TrAn	Laguna de Chochos	3557	-77.475	-7.63536	137	18133	Neotoma	Reading Palaeofire	Bush, M.B., Hansen, B.C.S., Rodbell, D.T., Seltzer, G.O., Young, K.R., León, B., Abbott, M.B., Silman, M.R., Gosling, W.D., 2005. A 17 000-year history of Andean climate and vegetation change from Laguna de Chochos, Peru. Journal of Quaternary Science 20, 703–714.
158	Amazonia	Humaitá	82	-63.782	-8.167	4	6337		Manually extracted	Cohen, M.C.L., Rossetti, D.F., Pessenda, L.C.R., Friaes, Y.S., Oliveira, P.E., 2014. Late Pleistocene glacial forest of Humaitá-Western Amazonia. Palaeogeogr. Palaeoclimatol. Palaeoecol. 415, 37–47.
159	NEB	Catimbau	690	-37.1889	-8.49056	-39	9688	Manually extracted		de Medeiros, V.B., de Oliveira, P.E., Santos, R.A., Barreto, A.M.F., de Oliveira, M.A.T., Pinaya, J.L.D., 2018. New holocene pollen records from the Brazilian Caatinga. An. Acad. Bras. Cienc. 90, 2011–2023.
160	Amazonia	Lago do Saci	218	-56.27	-9.116	1301	35064		Manually extracted	Cordeiro, R.C., Turcq, B., Moreira, L.S., Rodrigues, R. de A.R., Lamego Simões Filho, F.F., Martins, G.S., Santos, A.B., Barbosa, M., Guilles da Conceição, M.C., Rodrigues, R. de C., Evangelista, H., Moreira-Turcq, P., Penido, Y.P., Sifeddine, A., Seoane, J.C.S., 2014. Palaeofires in Amazon: Interplay between land use change and palaeoclimatic events. Palaeogeogr. Palaeoclimatol. Palaeoecol. 415,…
161	Amazonia	Lago do Saci	218	-56.27	-9.116	1222	33165	Manually extracted		Fontes, D., Cordeiro, R.C., Martins, G.S., Behling, H., Turcq, B., Sifeddine, A., Seoane, J.C.S., Moreira, L.S., Rodrigues, R.A., 2017. Paleoenvironmental dynamics in South Amazonia, Brazil, during the last 35,000 years inferred from pollen and geochemical records of Lago do Saci. Quat. Sci. Rev. 173, 161–180.
162	NEB	Saquinho	490	-43.21	-10.4	378	13063	Manually extracted	Reading Palaeofire	de Oliveira, P.E., Barreto, A.M.F., Suguio, K., 1999. Late Pleistocene/Holocene climatic and vegetational history of the Brazilian caatinga: the fossil dunes of the middle São Francisco River. Palaeogeography, Palaeoclimatology, Palaeoecology 152, 319–337.
163	CEB	Confusão lake	182	-49.7169	-10.6336	89	6980	Manually extracted		Behling, H., 2002. Late Quaternary vegetation and climate dynamics in southeastern Amazonia inferred from Lagoa da Confusão Tocantins State, northern Brazil. Amazoniana 17, 27–39.
164	TrAn	Laguna Huatacocha	4686	-76.6167	-10.7667	0	10616	Neotoma		Hansen, B.C.S., H.E. Wright, Jr., and J.P. Bradbury. 1984. Pollen studies in the Junín area, central Peruvian Andies. Geological Society of America Bulletin 95:1454-1465.
165	TrAn	Laguna Junín	4103	-76.1667	-11	3344	36361	Neotoma		Hansen, B.C.S., H.E. Wright, Jr., and J.P. Bradbury. 1984. Pollen studies in the Junín area, central Peruvian Andies. Geological Society of America Bulletin 95:1454-1465.
166	TrAn	Laguna Milloc	4657	-76.35	-11.5667	42	14613	Neotoma		Graf, K. 1992. Pollendiagramme aus den Anden: Eine Synthese zur Klimageschichte und Vegetationsentwicklung seit der letzten Eiszeit. Physische Geographie 34. Universität Zürich-Irchel, Geographisches Institut, Zürich, Switzerland.
167	TrAn	Laguna Paca	3429	-75.5	-11.7167	0	5408	Neotoma		Hansen, B.C.S., G.O. Seltzer, and H.E. Wright, Jr. 1994. Late Quaternary vegetational change in the central Peruvian Andes. Palaeogeography, Palaeoclimatology, Palaeoecology 109:263-285.
168	Amazonia	Werth	319	-69.23	-11.74	0	3137		DRYAD	Bush, M.B., Silman, M.R., Listopad, C.M.C.S., 2007. A regional study of Holocene climate change and human occupation in Peruvian Amazonia. Journal of Biogeography 34, 1342–1356. (doi:10.5061/dryad.nzs7h44r0)
169	TrAn	Laguna Pomacocha	4479	-75.25	-11.75	-92	12747	Neotoma		Hansen, B.C.S., G.O. Seltzer, and H.E. Wright, Jr. 1994. Late Quaternary vegetational change in the central Peruvian Andes. Palaeogeography, Palaeoclimatology, Palaeoecology 109:263-285.
170	TrAn	Laguna Jeronimo	4479	-75.2167	-11.7833	-105	13457	Neotoma		Hansen, B.C.S., G.O. Seltzer, and H.E. Wright, Jr. 1994. Late Quaternary vegetational change in the central Peruvian Andes. Palaeogeography, Palaeoclimatology, Palaeoecology 109:263-285.
171	Amazonia	Parker	264	-69.02	-12.14	0	8422		DRYAD	Bush, M.B., Silman, M.R., Listopad, C.M.C.S., 2007. A regional study of Holocene climate change and human occupation in Peruvian Amazonia. Journal of Biogeography 34, 1342–1356. (doi:10.5061/dryad.nzs7h44r0)
172	Amazonia	Gentry	265	-69.09	-12.17	0	8034		DRYAD	Bush, M.B., Silman, M.R., Listopad, C.M.C.S., 2007. A regional study of Holocene climate change and human occupation in Peruvian Amazonia. Journal of Biogeography 34, 1342–1356. (doi:10.5061/dryad.nzs7h44r0)
173	Amazonia	Vargas	248	-68.89	-12.37	44	8101		DRYAD	Bush, M.B., Silman, M.R., Listopad, C.M.C.S., 2007. A regional study of Holocene climate change and human occupation in Peruvian Amazonia. Journal of Biogeography 34, 1342–1356. (doi:10.5061/dryad.nzs7h44r0)
174	Amazonia	Lago Rogaguado	146	-65.9861	-12.9974	-41	7922	Neotoma	Reading Palaeofire	Brugger, S.O., E. Gobet, J.F.N. van Leeuwen, M.-P. Ledru, D. Colombaroli, W.O. van der Knaap, U. Lombardo, K. Escobar-Torrez, W. Finsinger, L. Rodrigues, A. Giesche, M. Zarate, H. Veit, and W. Tinner. 2016. Long-term man-environment interactions in the Bolivian Amazon: 8000 years of vegetation dynamics. Quaternary Science Reviews 132:114-128.
175	TrAn	Lake Refugio 1	3149	-71.7083	-13.0919	-59	19060	Neotoma		Urrego, D.H., B.A. Niccum, C.F. La Drew, M.R. Silman, and M.B. Bush. 2011. Fire and drought as drivers of early Holocene tree line changes in the Peruvian Andes. Journal of Quaternary Science 26(1):28-36.
176	TrAn	Lake Refugio 2	3149	-71.7053	-13.0949	-58	22108	Neotoma	Reading Palaeofire	Urrego, D.H., B.A. Niccum, C.F. La Drew, M.R. Silman, and M.B. Bush. 2011. Fire and drought as drivers of early Holocene tree line changes in the Peruvian Andes. Journal of Quaternary Science 26(1):28-36.
177	TrAn	Lake Refugio 3	3149	-71.7032	-13.0992	-59	13363	Neotoma		Urrego, D.H., B.A. Niccum, C.F. La Drew, M.R. Silman, and M.B. Bush. 2011. Fire and drought as drivers of early Holocene tree line changes in the Peruvian Andes. Journal of Quaternary Science 26(1):28-36.
178	TrAn	Marcacocha	4024	-72.2	-13.21	148	4004		Reading Palaeofire	Chepstow-Lusty, A.J., Bennett, K.D., Fjeldså, J., Kendall, A., Galiano, W., Tupayachi Herrera, A., 1998. Tracing 4,000 Years of environmental history in the Cuzco area, Peru, from the pollen record. Mountain Research and Development 18, 159.
179	Amazonia	Laguna Granja	142	-63.7103	-13.2634	0	6135	Neotoma		Carson, J.F., B.S. Whitney, F.E. Mayle, J. Iriarte, H. Prum̈ers, J.D. Soto, and J. Watling. 2014. Environmental impact of geometric earthwork construction in pre-Columbian Amazonia. Proceedings of the National Academy of Sciences of the United States of America 111(29):10497-10502.
180	Amazonia	Laguna Orí	141	-63.528	-13.3483	0	5683	Neotoma		Carson, J.F., B.S. Whitney, F.E. Mayle, J. Iriarte, H. Prum̈ers, J.D. Soto, and J. Watling. 2014. Environmental impact of geometric earthwork construction in pre-Columbian Amazonia. Proceedings of the National Academy of Sciences of the United States of America 111(29):10497-10502.
181	TrAn	Laguna de Pacucha	3427	-73.495	-13.6072	5732	19824		Reading Palaeofire	Valencia, B.G., Urrego, D.H., Silman, M.R., Bush, M.B., 2010. From ice age to modern: a record of landscape change in an Andean cloud forest. Journal of Biogeography 37, 1637–1647.
182	TrAn	Laguna de Pacucha	3221	-73.3222	-13.6148	-56	25207	Neotoma		Hillyer, R., B.G. Valencia, M.B. Bush, M.R. Silman, and M. Steinitz-Kannan. 2009. A 24,700-yr paleolimnological history from the Peruvian Andes. Quaternary Research 71(1):71-82.
183	Amazonia	Laguna Bella Vista	193	-61.55	-13.6167	54	56659	Neotoma	Reading Palaeofire	Burbridge, R.E., Mayle, F.E., Killeen, T.J., 2004. Fifty-thousand-year vegetation and climate history of Noel Kempff Mercado National Park, Bolivian Amazon. Quaternary Research 61, 215–230.
184	Amazonia	Lake Consuelo	924	-68.9916	-13.9513	5143	46627	Neotoma		Urrego Sanchez, D.H. 2006. Long-term vegetation and climate change in western Amazonia. Doctoral dissertation. Florida Institute of Technology, Melbourne, Florida, USA.
185	Amazonia	Lake Consuelo	924	-68.9916	-13.9513	303	5264	Neotoma		Urrego Sanchez, D.H. 2006. Long-term vegetation and climate change in western Amazonia. Doctoral dissertation. Florida Institute of Technology, Melbourne, Florida, USA.
186	CEB	Chapada dos Veadeiros	1000	-47.5	-14	2020	18200	Manually extracted	Manually extracted	Ferraz-Vicentini, K. R.: História do Fogo no Cerrado: Uma Análise palinológica (PhD Dissertation), Universidade de Brasília, 1999.
187	Amazonia	Lake Chalalan	396	-67.92	-14.42	247	15985	Neotoma	Reading Palaeofire	Urrego, D.H., 2006. Long-term Vegetation and Climate Change in Western Amazonia (PhD Dissertation). Biological Sciences. Florida Institute of Technology, Melbourne, FL.
188	Amazonia	Laguna Chaplin LCH	171	-61.0667	-14.4667	-59	56152	Neotoma	Reading Palaeofire	Burbridge, R.E., Mayle, F.E., Killeen, T.J., 2004. Fifty-thousand-year vegetation and climate history of Noel Kempff Mercado National Park, Bolivian Amazon. Quaternary Research 61, 215–230.
189	Amazonia	Lake Santa Rosa	350	-67.8764	-14.4849	167	16235	Neotoma	Reading Palaeofire	Urrego, D.H., M.B. Bush, M.R. Silman, B.A. Niccum, P. De la Rosa, C.H. McMichael, S. Hagen, and M. Palace. 2013. Holocene fires, forest stability and human occupation in south-western Amazonia. Journal of Biogeography 40(3):521-533.
190	TrAn	Katantica	4935	-69.1833	-14.8	51	7719	Neotoma		Graf, K. 1992. Pollendiagramme aus den Anden: Eine Synthese zur Klimageschichte und Vegetationsentwicklung seit der letzten Eiszeit. Physische Geographie 34. Universität Zürich-Irchel, Geographisches Institut, Zürich, Switzerland.
191	CEB	Vereda de Águas Emendadas	1093	-47.7836	-14.8469	52	31678	Manually extracted	Manually extracted	Salgado-Labouriau, M.L., Barberi, M., Ferraz-Vicentini, K.R., Parizzi, M.G., 1998. A dry climatic event during the late Quaternary of tropical Brazil. Rev. Palaeobot. Palynol. 99, 115–129.
192	TrAn	Cotapampa	4440	-69.1	-15.2167	-97	13060	Neotoma		Graf, K. DOI: 10.21233/n3589r
193	TrAn	Amarete	3874	-68.9833	-15.2333	0	9321	Neotoma		Graf, K. 1992. Pollendiagramme aus den Anden: Eine Synthese zur Klimageschichte und Vegetationsentwicklung seit der letzten Eiszeit. Physische Geographie 34. Universität Zürich-Irchel, Geographisches Institut, Zürich, Switzerland.
194	-	Pontes e Lacerda	273	-59.21	-15.26	39	12694		Reading Palaeofire	Marques Gouveia, S.E., Ruiz Pessenda, L.C., Aravena, R., Boulet, R., Scheel-Ybert, R., Bendassoli, J.A., de Souza Ribeiro, A., de Freitas, H.A., 2002. Carbon isotopes in charcoal and soils in studies of paleovegetation and climate changes during the late Pleistocene and the Holocene in the southeast and centerwest regions of Brazil. Global and Planetary change 33, 95–106.
195	CEB	Lagoa Feia	915	-47.3014	-15.5681	-35	15331	Manually extracted	Manually extracted	Escobar‐Torrez, K., Ledru, M., Cassino, R. F., Bianchini, P. R., and Yokoyama, E.: Long‐and short‐term vegetation change and inferred climate dynamics and anthropogenic activity in the central Cerrado during the Holocene, J. Quat. Sci., https://doi.org/10.1002/jqs.3567, 2023.
196	CEB	Lagoa Bonita	960	-47.69	-15.58	3260	23760	Manually extracted		Barberi, M.: Mudanças paleoambientais na região dos cerrados do planalto central durante o quaternário tardio: o estudo da lagoa bonita (DF), University of São Paulo, 210 pp., https://doi.org/https://doi.org/10.11606/T.44.2001.tde-04112015-161453, 2001.
197	Amazonia	Yaguaru	195	-63.21	-15.6	0	4924		Reading Palaeofire	Taylor, Z.P., 2005. Environmental History at Laguna Yaguarú, Bolivia: Evidence from Pollen, Stable Carbon Isotopes, and an Embedded Mineral Facies (MSc thesis). University of Tennessee, Knoxville, Tennessee, USA.
198	-	Coropuna peat bog	4673	-72.6994	-15.6163	38	9476	Neotoma		Kuentz, A., M.-P. Ledru, and J.-C. Thouret. 2012. Environmental changes in the highlands of the western Andean Cordillera, southern Peru, during the Holocene. The Holocene 22(11):1215-1226.
199	TrAn	Lake Titicaca NE98-1PC	3815	-69.2053	-16.2053	444	6193	Neotoma	Reading Palaeofire	Paduano, G.M., Bush, M.B., Baker, P.A., Fritz, S.C., Seltzer, G.O., 2003. A vegetation and fire history of Lake Titicaca since the Last Glacial Maximum. Palaeogeography, Palaeoclimatology, Palaeoecology 194, 259–279.
200	TrAn	Nevado Sabancaya	4306	-71.0833	-16.2167	6355	12648	Neotoma		Graf, K. DOI: 10.21233/n3194z
201	TrAn	Cerro Calvario	3992	-68.5	-16.25	4630	8361	Neotoma		Graf, K. 1992. Pollendiagramme aus den Anden: Eine Synthese zur Klimageschichte und Vegetationsentwicklung seit der letzten Eiszeit. Physische Geographie 34. Universität Zürich-Irchel, Geographisches Institut, Zürich, Switzerland.
202	TrAn	Lago Huiñaimarca LT01-3B	3815	-68.727	-16.2841	-3	225988	Neotoma		Gosling, W.D., M.B. Bush, J.A. Hanselman, and A. Chepstow-Lusty. 2008. Glacial-interglacial changes in moisture balance and the impact on vegetation in the southern hemisphere tropical Andes (Bolivia/Peru). Palaeogeography, Palaeoclimatology, Palaeoecology 259(1):35-50.
203	TrAn	Cumbre Unduavi	4703	-68.0417	-16.35	-219	27904	Neotoma		Graf, K. 1992. Pollendiagramme aus den Anden: Eine Synthese zur Klimageschichte und Vegetationsentwicklung seit der letzten Eiszeit. Physische Geographie 34. Universität Zürich-Irchel, Geographisches Institut, Zürich, Switzerland.
204	TrAn	Chacaltaya 1	4792	-68.15	-16.3667	89	7655	Neotoma		Graf, K. 1992. Pollendiagramme aus den Anden: Eine Synthese zur Klimageschichte und Vegetationsentwicklung seit der letzten Eiszeit. Physische Geographie 34. Universität Zürich-Irchel, Geographisches Institut, Zürich, Switzerland.
205	TrAn	Chacaltaya 2	4792	-68.15	-16.3667	0	10920	Neotoma		Graf, K. 1992. Pollendiagramme aus den Anden: Eine Synthese zur Klimageschichte und Vegetationsentwicklung seit der letzten Eiszeit. Physische Geographie 34. Universität Zürich-Irchel, Geographisches Institut, Zürich, Switzerland.
206	TrAn	Laguna Salinas	4334	-71.15	-16.4	0	14732	Neotoma		Graf, K. DOI: 10.21233/n3bp82
207	TrAn	Río Kaluyo	4244	-68.1333	-16.4333	136	10323	Neotoma		Graf, K. 1992. Pollendiagramme aus den Anden: Eine Synthese zur Klimageschichte und Vegetationsentwicklung seit der letzten Eiszeit. Physische Geographie 34. Universität Zürich-Irchel, Geographisches Institut, Zürich, Switzerland.
208	TrAn	Monte Blanco	4879	-67.35	-17.025	38	1273	Neotoma		Graf, K. 1992. Pollendiagramme aus den Anden: Eine Synthese zur Klimageschichte und Vegetationsentwicklung seit der letzten Eiszeit. Physische Geographie 34. Universität Zürich-Irchel, Geographisches Institut, Zürich, Switzerland.
209	TrAn	Monte Blanco	4879	-67.35	-17.025	935	8325	Neotoma		Graf, K. 1992. Pollendiagramme aus den Anden: Eine Synthese zur Klimageschichte und Vegetationsentwicklung seit der letzten Eiszeit. Physische Geographie 34. Universität Zürich-Irchel, Geographisches Institut, Zürich, Switzerland.
210	CEB	Vereda São José	709	-45.1114	-17.0793	56	15749	Neotoma	Manually extracted	Cassino, R.F., C.T. Martinho, and S.A.F. da Silva Caminha. 2018. A Late Quaternary palynological record of a palm swamp in the Cerrado of central Brazil interpreted using modern analog data. Palaeogeography, Palaeoclimatology, Palaeoecology 490:1-16.
211	CEB	Crominia	708	-49.41	-17.27	5113	39607	Manually extracted	Reading Palaeofire	Salgado-Labouriau, M.L., Casseti, V., Ferraz-Vicentini, K.R., Martin, L., Soubiès, F., Suguio, K., Turcq, B., 1997. Late Quaternary vegetational and climatic changes in cerrado and palm swamp from Central Brazil. Palaeogeography, Palaeoclimatology, Palaeoecology 128, 215–226.
212	CEB	Urbano swamp	650	-45.1	-17.3	1500	13120	Manually extracted		Lorente, F. L. and Meyer, K. E. B.: Palinomorfos da vereda da Fazenda Urbano, município de Buritizeiro, Minas Gerais, Brasil, Iheringia - Ser. Bot., 65, 133–169, 2010.
213	TrAn	Cala Conto	2710	-65.9333	-17.5667	10077	36533	Neotoma		Graf, K. 1992. Pollendiagramme aus den Anden: Eine Synthese zur Klimageschichte und Vegetationsentwicklung seit der letzten Eiszeit. Physische Geographie 34. Universität Zürich-Irchel, Geographisches Institut, Zürich, Switzerland.
214	TrAn	Siberia 93-1	2636	-64.7189	-17.8333	4652	53543		Reading Palaeofire	Mourguiart, P., Ledru, M.-P., 2003. Last glacial maximum in an Andean cloud forest environment (Eastern Cordillera, Bolivia). Geology 31, 195–198.
215	CEB	Lago do Pires	407	-42.2167	-17.95	199	10921	Neotoma	Reading Palaeofire	Behling, H., 1995. A high resolution Holocene pollen record from Lago do Pires, SE Brazil: vegetation, climate and fire history. Journal of Paleolimnology 14, 253–268.
216	CEB	Lagoa Nova	438	-42.2	-17.95	95	10796	Manually extracted	Reading Palaeofire	Behling, H., 2003. Late Glacial and Holocene vegetation, climate and fire history inferred from Lagoa Nova in the southeastern Brazilian lowland. Vegetation History and Archaeobotany 12, 263–270.
217	CEB	Lago Aleixo	406	-42.1189	-17.9878	-54	9253	Manually extracted		Enters, D., Behling, H., Mayr, C., Dupont, L., Zolitschka, B., 2010. Holocene environmental dynamics of south-eastern Brazil recorded in laminated sediments of Lago Aleixo. J. Paleolimnol. 44, 265–277.
218	CEB	Pinheiro mire	1240	-43.6618	-18.0623	99	34350	Manually extracted		Horák‐Terra, I., Cortizas, A. M., Da Luz, C. F. P., Silva, A. C., Mighall, T., De Camargo, P. B., Mendonça‐Filho, C. V., De Oliveira, P. E., Cruz, F. W., and Vidal‐Torrado, P.: Late Quaternary vegetation and climate dynamics in central‐eastern Brazil: insights from a ~35k cal a BP peat record in the Cerrado biome, J. Quat. Sci., jqs.3209, https://doi.org/10.1002/jqs.3209, 2020.
219	-	Laguna Mandioré	90	-57.5627	-18.0918	-30	11248	Neotoma		Plumpton, H.J., F.E. Mayle, and B.S. Whitney. 2019. Long-term impacts of mid-Holocene drier climatic conditions on Bolivian tropical dry forests. Quaternary Research.
220	TrAn	Sajama	4338	-68.8833	-18.1667	0	4397	Neotoma		Ybert, J.P., and Y. Miranda. 1984. Analisis palinologico de un corte del Sajama. Actas II Congreso Geologico Bolivia, 691-694.
221	TrAn	Ajata	4796	-69.2	-18.25	0	2839	Neotoma		Graf, K. DOI: 10.21233/n36t1j
222	CEB	Pau de Fruta mire	1396	-43.6752	-18.2575	-51	9595	Manually extracted		Horák-Terra, I., Martínez Cortizas, A., da Luz, C.F.P., Rivas López, P., Silva, A.C., Vidal-Torrado, P., 2015. Holocene climate change in central-eastern Brazil reconstructed using pollen and geochemical records of Pau de Fruta mire (Serra do Espinhaço Meridional, Minas Gerais). Palaeogeogr. Palaeoclimatol. Palaeoecol. 437, 117–131.
223	TrAn	Quebrada La Higuera	3473	-69.5452	-18.662	-7	0	Neotoma		Mujica, M.-I., C. Latorre, A. Maldonado, L. González-Silvestre, R. Pinto, R. de Pol-Holz, and C.M. Santoro. 2014. Late Quaternary climate change, relict populations and present-day refugia in the northern Atacama Desert: a case 1 study from Quebrada La Higuera (18Â° S). Journal of Biogeography.
224	CEB	Serra Negra	1083	-46.8889	-18.9097	223	86927	Manually extracted		De Oliveira, P.E., Raczka, M., McMichael, C.N.H., Pinaya, J.L.D., Bush, M.B., 2020. Climate change and biogeographic connectivity across the Brazilian cerrado. J. Biogeogr. 47, 396–407
225	CEB	Lagoa Campestre de Salitre	1054	-46.7667	-19	2380	65511	Neotoma	Reading Palaeofire	Ledru, M.-P., H. Behling, M. Fournier, L. Martin, and M. Servant. 1994. Localisation de la forêt d'Araucaria du Brésil au cours de l'HolocÃ¨ne. Implications paléoclimatiques. C.R. Acad. Sci. Paris 317:517-521.
226	SESA	Nativo do Flamengo	31	-39.9395	-19.1635	-64	6304	Neotoma		Buso Jr, A.A., L.C.R. Pessenda, F.E. Mayle, F.L. Lorente, C. Volkmer-Ribeiro, J.A. Schiavo, M.G. Pereira, J.A. Bendassolli, K.C.D. Macario, and G.S. Siqueira. 2019. Paleovegetation and paleoclimate dynamics during the last 7000 years in the Atlantic forest of Southeastern Brazil based on palynology of a waterlogged sandy soil. Review of Palaeobotany and Palynology 264:1-10.
227	CEB	Lagoa Santa	784	-43.9003	-19.6336	546	6175	Manually extracted		Salgado-Labouriau, M.L., Barberi, M., Ferraz-Vicentini, K.R., Parizzi, M.G., 1998. A dry climatic event during the late Quaternary of tropical Brazil. Rev. Palaeobot. Palynol. 99, 115–129
228	CEB	Lagoa dos Olhos	801	-43.867	-19.6336	43	23399	Manually extracted		De Oliveira, P. E. 1992. A Palynological Record of Late Quaternary Vege- tational and Climatic Change in Southeastern Brazil. Ph.D. thesis, Ohio State University, Columbus, Ohio, U.S.A
229	CEB	Lagoa Mares	720	-43.98	-19.68	0	23000	Manually extracted		Raczka, M. F., Bush, M. B., and De Oliveira, P. E.: The collapse of megafaunal populations in southeastern Brazil, Quat. Res. (United States), 89, 103–118, https://doi.org/10.1017/qua.2017.60, 2018.
230	SESA	GeoB3202-1	-1136	-39.9686	-21.6169	14392	64600	Manually extracted		Behling, H., Arz, H.W., Pätzold, J., Wefer, G., 2002. Late Quaternary vegetational and climate dynamics in southeastern Brazil, inferences from marine cores GeoB 3229-2 and GeoB 3202-1. Palaeogeogr. Palaeoclimatol. Palaeoecol. 179, 227–243.
231	TrAn	Toconce	3604	-68.1425	-22.2455	0	0	Neotoma		Jara, I.A., A. Maldonado, and M.E. De Porras. 2022. Did modern precipitation drivers influence centennial trends in the highlands of the Atacama Desert during the most recent millennium?. Geophysical Research Letters 49(1):1-13. https://agupubs.onlinelibrary.wiley.com/doi/abs/10.1029/2021GL095927.
232	SESA	Itatiaia (AN )	2118	-44.6698	-22.3853	6	7563	Manually extracted	Reading Palaeofire	Behling, H., Jantz, N., Safford, H.D., 2020. Mid-and late Holocene vegetation, climate and fire dynamics in the Serra do Itatiaia, Rio de Janeiro State, southeastern Brazil. Review of Palaeobotany and Palynology 274, 104152.
233	SESA	Serra dos Órgãos	1567	-43.0281	-22.4583	15	12488	Manually extracted	Manually extracted	Jeske-Pieruschka, V., Pillar, V.D., de Oliveira, M.A.T., Behling, H., 2013. New insights into vegetation, climate and fire history of southern Brazil revealed by a 40,000 year environmental record from the State Park Serra do Tabuleiro. Veg. Hist. Archaeobot. 22, 299–314.
234	SESA	Morro de Itapeva	1753	-45.57	-22.78	-43	23282	Neotoma	Reading Palaeofire	Behling, H., 1997. Late Quaternary vegetation, climate and fire history from the tropical mountain region of Morro de Itapeva, SE Brazil. Palaeogeography, Palaeoclimatology, Palaeoecology 129, 407–422.
235	SESA	Botucatu BOT profile	602	-48	-23.18	222	8794		Reading Palaeofire	Ruiz Pessenda, L.C., Marques Gouveia, S.E., Aravena, R., Boulet, R., Valencia, E.P.E., 2004. Holocene fire and vegetation changes in southeastern Brazil as deduced from fossil charcoal and soil carbon isotopes. Quaternary International 114, 35–43.
236	TrAn	Tumbre 1	4091	-67.7833	-23.3167	247	7500	Neotoma		Ybert, J.P., and Y. Miranda. 1984. Analisis palinologico de un corte del Sajama. Actas II Congreso Geologico Bolivia, 691-694.
237	TrAn	Laguna Miscanti	4162	-67.7756	-23.725	87.34	13604.2	Neotoma		Grosjean, M., J.F.N. van Leeuwen, W.O. van der Knaap, M.A. Geyh, B. Ammann, W. Tanner, B. Messerli, L.A. Nuñez, B.L. Valero-Garcés, and H. Veit. 2001. A 22,000 14C year BP sediment and pollen record of climate change from Laguna Miscanti (23Â°S), northern Chile. Global and Planetary Change 28:35-51.
238	TrAn	Aguilar	3972	-65.75	-23.8333	0	9822	Neotoma		Markgraf, V. 1985. Paleoenvironemtal history of the last 10,000 years in northwestern Argentina. Zentralblatt Geologie Palaeontologie 11/12:1739-1749.
239	SESA	Colonia	779	-46.7075	-23.8675	-262	215952	Pangaea	Reading Palaeofire	Rodríguez-Zorro, P.A., Ledru, M.-P., Bard, E., Aquino-Alfonso, O., Camejo, A., Daniau, A.-L., Favier, C., Garcia, M., Mineli, T.D., Rostek, F., Ricardi-Branco, F., 2020. Shut down of the South American summer monsoon during the penultimate glacial. Scientific Reports 10, 1–11.
240	TrAn	Tuyajto	3969	-67.7833	-23.95	1045	14894	Neotoma		Ybert, J.P., and Y. Miranda. 1984. Analisis palinologico de un corte del Sajama. Actas II Congreso Geologico Bolivia, 691-694.
241	SESA	Serra Campos Gerais	1161	-50.2167	-24.6667	-45	14554	Neotoma	Reading Palaeofire	Behling, H., 1997. Late Quaternary vegetation, climate and fire history of the Araucaria forest and campos region from Serra Campos Gerais, Paraná State (South Brazil). Review of Palaeobotany and Palynology 97, 109–121.
242	SESA	Serra Araçatuba	1246	-48.98	-25.92	0	14635	Manually extracted	Reading Palaeofire	Behling, H., 2007. Late Quaternary vegetation, fire and climate dynamics of Serra do Araçatuba in the Atlantic coastal mountains of Paraná State, southern Brazil. Vegetation History and Archaeobotany 16, 77–85.
243	SESA	Volta Velha	15	-48.6336	-26.0669	955	26081	Manually extracted		Behling, H., Negrelle, R.R.B., 2001. Tropical rain forest and climate dynamics of the Atlantic lowland, Southern Brazil, during the late Quaternary. Quat. Res. 56, 383–389.
244	-	São Francisco do Sul Bay	138	-48.788	-26.113	-68	2554	Neotoma		Rodrigues, E., M.C.L. Cohen, L.C.R. Pessenda, M.C. França, E. Magalhães, and Q. Yao. 2022. Poleward mangrove expansion in South America coincides with MCA and CWP: A diatom, pollen, and organic geochemistry study. Quaternary Science Reviews 288:in press.
245	SESA	Poço Grande	11	-48.8667	-26.4167	-39	4839	Neotoma		Behling, H. 1993. Untersuchungen zur spätpleistozänen und holozänen Vegetations- und Klimageschichte der tropischen Küstenwälder und der Araukarienwälder in Santa Catarina (Südbrasilien). Dissertationes Botanicae 206. J Cramer, Berlin Stuttgart, Germany.
246	SESA	GeoB2107-3	-836	-46.7503	-27.3003	582	79869	Pangaea		Gu, F., Zonneveld, K.A.F., Chiessi, C.M., Arz, H.W., Pätzold, J., Behling, H., 2017. Long-term vegetation, climate and ocean dynamics inferred from a 73,500 years old marine sediment core (GeoB2107-3) off southern Brazil. Quat. Sci. Rev. 172, 55–71.
247	SESA	Serra da Boa Vista	1022	-49.15	-27.7	-41	17999	Neotoma		Behling, H. 1993. Untersuchungen zur spätpleistozänen und holozänen Vegetations- und Klimageschichte der tropischen Küstenwälder und der Araukarienwälder in Santa Catarina (Südbrasilien). Dissertationes Botanicae 206. J Cramer, Berlin Stuttgart, Germany.
248	SESA	Santa Catarina Island	82	-48.529	-27.777	-57	6622	Neotoma		Kuhn, L.A., K.A.F. Zonneveld, P.A. Souza, and R.R. Cancelli. 2023. Late Quaternary palaeoenvironmental evolution and sea level oscillation of the Santa Catarina Island (southern Brazil). Biogeosciences in press.
249	SESA	Serra do Tabuleiro	916	-48.8681	-27.8968	-4	43127	Manually extracted	Manually extracted	Behling, H., Safford, H.D., 2010. Late-glacial and Holocene vegetation, climate and fire dynamics in the Serra dos Órgãos, Rio de Janeiro State, southeastern Brazil. Glob. Chang. Biol. 16, 1661–1671. https://doi.org/10.1111/j.1365-2486.2009.02029.x
250	SESA	Morro da Igreja	1365	-49.8667	-28.1833	-39	10386	Neotoma		Behling, H. 1995. Investigations into the Late Pleistocene and Holocene history of vegetation and climate in Santa Catarina (S Brazil). Vegetation History and Archaeobotany 4:127-152.
251	SESA	Rincão das Cabritas	972	-50.5728	-28.4764	-8	16348	Manually extracted	Manually extracted	Jeske-Pieruschka, V., Behling, H., 2012. Palaeoenvironmental history of the São Francisco de Paula region in southern Brazil during the late Quaternary inferred from the Rincão das Cabritas core. Holocene 22, 1251–1262
252	SESA	Serra do Rio Rastro	313	-49.55	-28.55	800	11014	Neotoma		Behling, H. 1993. Untersuchungen zur spätpleistozänen und holozänen Vegetations- und Klimageschichte der tropischen Küstenwälder und der Araukarienwälder in Santa Catarina (Südbrasilien). Dissertationes Botanicae 206. J Cramer, Berlin Stuttgart, Germany.
253	SESA	Cambara do Sul	1056	-50.1011	-29.0525	-50	45816	Manually extracted	Reading Palaeofire	Behling, H., Pillar, V.D., Orlóci, L., Girardi Bauermann, S., 2004. Late Quaternary Araucaria forest, grassland (Campos), fire and climate dynamics, studied by high-resolution pollen, charcoal and multivariate analysis of the Cambará do Sul core in southern Brazil. Palaeogeography, Palaeoclimatology, Palaeoecology 203, 277–297.
254	SESA	Fazendo do Pinto	835	-50.56	-29.4	21	2564		Reading Palaeofire	Behling, H., Girardi Bauermann, S., Pereira Neves, P.C., 2001. Holocene environmental changes in the São Francisco de Paula region, southern Brazil. Journal of South American Earth Sciences 14, 631–639.
255	SESA	Alpes de São Francisco	671	-50.6217	-29.4931	2924	29669	Manually extracted		Leonhardt, A., Lorscheitter, M.L., 2010. The last 25,000 years in the Eastern Plateau of Southern Brazil according to Alpes de São Francisco record. J. South Am. Earth Sci. 29, 454–463
256	SESA	Sao Francisco de Assis	113	-55.21	-29.58	33	23726	Manually extracted	Reading Palaeofire	Behling, H., Pillar, V.D., Girardi Bauermann, S., 2005. Late Quaternary grassland (Campos), gallery forest, fire and climate dynamics, studied by pollen, charcoal and multivariate analysis of the São Francisco de Assis core in western Rio Grande do Sul (southern Brazil). Review of Palaeobotany and Palynology 133, 235–248.
257	-	Salina 2	2599	-69.3333	-32.25	100	6507	Neotoma		Markgraf, V. 1983. Late and postglacial vegetational and paleoclimatic changes in subantarctic, temperate, and arid environments in Argentina. Palynology 7(1):43-70.
258	SESA	GeoB6211-2	-664	-50.24	-32.5	89	19228	Pangaea		Gu, F., Chiessi, C.M., Zonneveld, K.A.F., Behling, H., 2018. Late Quaternary environmental dynamics inferred from marine sediment core GeoB6211-2 off southern Brazil. Palaeogeogr. Palaeoclimatol. Palaeoecol. 496, 48–61.
259	ExTrAn	Laguna Aculeo	493	-70.91	-33.8333	-40	7446	Manually extracted	Reading Palaeofire	Villa-Martínez, R., Villagrán, C., Jenny, B., 2003. The last 7500 cal yr B.P. of westerly rainfall in Central Chile inferred from a high-resolution pollen record from Laguna Aculeo (34({}^circ)S). Quaternary Research 60, 284–293.
260	ExTrAn	Tagua Tagua	274	-71.16	-34.5	598	58113		Reading Palaeofire	Heusser, C.J., 1990. Ice age vegetation and climate of subtropical Chile. Palaeogeography, Palaeoclimatology, Palaeoecology 80, 107–127.
261	ExTrAn	Laguna El Sosneado	2346	-69.9179	-34.8435	24	2215	Neotoma	Neotoma	Nanavati, W., C. Whitlock, M.E. de Porras, A. Gil, D. Navarro, and G. Neme. 2022. Disentangling the last 1,000 years of human-environment interactions along the eastern side of the southern Andes (34-52 S Lat.). Proceedings of the National Academies of Sciences 119.
262	ExTrAn	Salado	1803	-69.75	-35.3333	22	4321	Neotoma		Markgraf, V. 1983. Late and postglacial vegetational and paleoclimatic changes in subantarctic, temperate, and arid environments in Argentina. Palynology 7(1):43-70.
263	ExTrAn	Laguna del Maule	2170	-70.5152	-36.0643	-65	728	Neotoma		Carrevedo, M.L., M. Frugone, C. Latorre, A. Maldonado, P. Bernárdez, R. Prego, D. Cárdenas, and B. Valero-Garcés. 2015. A 700-year record of climate and environmental change from a high Andean lake: Laguna del Maule, central Chile (36Â°S). The Holocene 25(6):956-972.
264	ExTrAn	Veranada Vulkanpickel	3224	-70.4167	-36.6833	39	7783	Neotoma		Schäbitz, F. 1989. Untersuchungen zum aktuellen Pollenniederschlag und zur holozänen Klima- und Vegetationsentwicklung in den Anden Nord-Neuquéns, Argentinien. Bamberger Geographische Schriften 8. Bamberg, Germany.
265	ExTrAn	Mallín Vaca Lauquen	1615	-71.0485	-36.858	-13	16154	Neotoma	Neotoma	Markgraf, V., C. Whitlock, R.S. Anderson, and A. Garcia. 2009. Late Quaternary vegetation and fire history in the northernmost Nothofagus forest region: Mallin Vaca Lauquen, Neuquen Province, Argentina. Journal of Quaternary Science 24(3):248-258.
266	ExTrAn	Mallín Vaca Lauquen	1615	-71.0489	-36.8585	0	11258	Neotoma		Markgraf, V. 1987. Paleoenvironmental changes at the northern limit of the subantarctic Nothofagus forest, latitude 37Â°S, Argentina. Quaternary Research 28:119-129.
267	ExTrAn	Veranada Pelan	1880	-70.3833	-36.8833	5	10890	Neotoma		Schäbitz, F. 1989. Untersuchungen zum aktuellen Pollenniederschlag und zur holozänen Klima- und Vegetationsentwicklung in den Anden Nord-Neuquéns, Argentinien. Bamberger Geographische Schriften 8. Bamberg, Germany.
268	ExTrAn	Laguna Portezuelo	1680	-71.0408	-37.9118	12	11273	Neotoma	Neotoma	Nanavati, William. 2020. Disentangling Anthropogenic and Natural Drivers of Change in Vegetation and Fire History Along the Forest-grassland Ecotones of the Central United States and Patagonia. Doctoral dissertation. Montana State University, Bozeman, Montana, U.S.A.
269	ExTrAn	Cueva Haichol	1151	-70.6667	-38.5833	-19	7856	Neotoma		Markgraf, V. 1988/90. Analisis palinologicos de los sedimentos. In J.C. Fernandez, editor. Arqueologia de la Cueva Haichol. Anales de Arqueologia y Etnologia 43/45:97-102.
270	-	Salina Anzoátegui	16	-63.775	-39.0064	9	10353	Neotoma		Schäbitz, F. 1994. Holocene climatic variations in northern Patagonia, Argentina. Palaeogeography, Palaeoclimatology, Palaeoecology 109:287-294.
271	ExTrAn	Caunahue	946	-72	-40	2810	19239	Neotoma		Markgraf, V. 1991. Younger Dryas in southern South America?. Boreas 20(1):63-69.
272	-	Salina Piedra	-5	-62.6739	-40.5831	0	4247	Neotoma		Schäbitz, F. 1994. Holocene climatic variations in northern Patagonia, Argentina. Palaeogeography, Palaeoclimatology, Palaeoecology 109:287-294.
273	ExTrAn	Primavera	950	-71.1833	-40.6667	1835	4375	Neotoma		Markgraf, V., J. Betancourt, and K. Rylander. 1996 (in prep) Amberat middens from Rio Limay, Neuquen Province, Argentina.
274	ExTrAn	Encantado	903	-71.1333	-40.6667	295	1260	Neotoma		Markgraf, V., J. Betancourt, and K. Rylander. 1996 (in prep) Amberat middens from Rio Limay, Neuquen Province, Argentina.
275	ExTrAn	Lago Llanquihue (Puerto Octay) (PM)	166	-72.9	-40.9333	8414	23788		Reading Palaeofire	Moreno, P.I., 1993. Vegetation and Climate near Lago Llanquihue in the Chilean Lake District (MSc thesis). University of Maine, Orono, Maine, USA.
276	ExTrAn	Canal de la Puntilla	166	-72.905	-40.9525	12856	14164	Neotoma	Reading Palaeofire	Moreno, P.I., 1997. Vegetation and climate near Lago Llanquihue in the Chilean Lake District between 20200 and 9500 (^{14})C yr BP. Journal of Quaternary Science 12, 485–500.
277	ExTrAn	Canal de la Puntilla	166	-72.905	-40.9525	521	20157	Neotoma		Moreno, P.I. 1993. Vegetation and climate near Lago Llanquihue in the Chilean Lake District. M.S. Thesis. University of Maine, Orono, Maine, USA.
278	ExTrAn	Lago Moreno	813	-71.5167	-41.0583	1681	14596	Neotoma		Valencio, D.A., A.M. Sinito, K.M. Creer, M.M. Mazzoni, M.S. Alonso, and V. Markgraf. 1985. Palaeomagnetism, sedimentology, radiocarbon age determinations and palynology of the Llao Llao area, southwestern Argentina (lat. 41Â°S, long. 71Â°30'W): palaeolimnological aspects. Quaternary of South America and Antarctic Peninsula 3:109-148.
279	ExTrAn	Trebol Lake	810	-71.49	-41.07	-52	17674		Reading Palaeofire	Whitlock, C., Bianchi, M.M., Bartlein, P.J., Markgraf, V., Marlon, J., Walsh, M., McCoy, N., 2006. Postglacial vegetation, climate, and fire history along the east side of the Andes (lat 41–42.5°S), Argentina. Quaternary Research 66, 187–201.
280	ExTrAn	Laguna el Trébol	810	-71.4945	-41.071	-20	20444	Neotoma		Iglesias, V., C. Whitlock, V. Markgraf, and M.M. Bianchi. 2014. Postglacial history of the Patagonian forest/steppe ecotone (41â€”43Â°S). Quaternary Science Reviews 94:120-135.
281	ExTrAn	Pichilaguna	121	-73.0588	-41.2488	-16	21197	Manually extracted	Manually extracted	Moreno, P.I., Videla, J., Valero-Garcés, B., Alloway, B. V., Heusser, L.E., 2018. A continuous record of vegetation, fire-regime and climatic changes in northwestern Patagonia spanning the last 25,000 years. Quat. Sci. Rev. 198, 15–36.
282	ExTrAn	Lago Mascardi-Gutierrez	1228	-71.4667	-41.25	129	10163	Neotoma		Markgraf, V. 1983. Late and postglacial vegetational and paleoclimatic changes in subantarctic, temperate, and arid environments in Argentina. Palynology 7(1):43-70.
283	ExTrAn	Mallin Book	1039	-71.5833	-41.3333	103	17046	Neotoma		Markgraf, V. 1983. Late and postglacial vegetational and paleoclimatic changes in subantarctic, temperate, and arid environments in Argentina. Palynology 7(1):43-70.
284	ExTrAn	Laguna Padre Laguna	902	-71.5093	-41.3599	-61	5304	Neotoma		Iglesias, V., C. Whitlock, V. Markgraf, and M.M. Bianchi. 2014. Postglacial history of the Patagonian forest/steppe ecotone (41â€”43Â°S). Quaternary Science Reviews 94:120-135.
285	ExTrAn	Lago Huala Hué	726	-71.5083	-41.5112	-57	13378	Neotoma		Iglesias, V., C. Whitlock, V. Markgraf, and M.M. Bianchi. 2014. Postglacial history of the Patagonian forest/steppe ecotone (41â€”43Â°S). Quaternary Science Reviews 94:120-135.
286	ExTrAn	Cordón Serrucho Norte wetland	871	-71.4288	-41.7518	-50	16621	Neotoma		Markgraf, V., V. Iglesias, and C. Whitlock. 2013. Late and postglacial vegetation and fire history from Cordón Serrucho Norte, northern Patagonia. Palaeogeography, Palaeoclimatology, Palaeoecology 371:109-118.
287	ExTrAn	Lago Proschle	68	-72.7772	-41.8686	43	17511	Manually extracted	Manually extracted	Moreno, P.I., 2020. Timing and structure of vegetation, fire, and climate changes on the Pacific slope of northwestern Patagonia since the last glacial termination. Quat. Sci. Rev. 238, 106328
288	ExTrAn	Laguna del Cóndor	907	-71.2901	-42.3522	-51	10443	Neotoma		Iglesias, V., C. Whitlock, M.M. Bianchi, G. Villarosa, and V. Outes. 2012. Holocene climate variability and environmental history at the Patagonian forest/steppe ecotone: Lago Mosquito (42°29'37.89"S, 71°24'14.57"W) and Laguna del Cóndor (42Â°20'47.22"S, 71Â°17'07.62"W). The Holocene 22(11):1297-1307.
289	ExTrAn	Lago Mosquito	694	-71.4018	-42.4918	7	9516	Neotoma		Iglesias, V., C. Whitlock, M.M. Bianchi, G. Villarosa, and V. Outes. 2012. Holocene climate variability and environmental history at the Patagonian forest/steppe ecotone: Lago Mosquito (42Â°29'37.89"S, 71Â°24'14.57"W) and Laguna del Cóndor (42Â°20'47.22"S, 71Â°17'07.62"W). The Holocene 22(11):1297-1307.
290	ExTrAn	Lepue	159	-73.7121	-42.8048	-51	18125		Reading Palaeofire	Pesce, O.H., Moreno, P.I., 2014. Vegetation, fire and climate change in central-east Isla Grande de Chiloé (43(^circ)S) since the Last Glacial Maximum, northwestern Patagonia. Quaternary Science Reviews 90, 143–157.
291	ExTrAn	Laguna la Zeta	778	-71.3494	-42.8902	-39	20422		Reading Palaeofire	Iglesias, V., Whitlock, C., Markgraf, V., Bianchi, M.M., 2014. Postglacial history of the Patagonian forest/steppe ecotone (41–43(^circ)S). Quaternary Science Reviews 94, 120–135.
292	ExTrAn	Lago Theobald	696	-71.5622	-43.4376	-54	11603	Neotoma	Reading Palaeofire	Iglesias, V., C. Whitlock, V. Markgraf, and M.M. Bianchi. 2014. Postglacial history of the Patagonian forest/steppe ecotone (41â€”43Â°S). Quaternary Science Reviews 94:120-135.
293	ExTrAn	Lago Los Ninos	1070	-71.4915	-44.0103	100	16988	Neotoma		Iglesias, V., V. Markgraf, and C. Whitlock. 2016. 17,000 years of vegetation, fire and climate change in the eastern foothills of the Andes (lat. 44Â°S). Palaeogeography, Palaeoclimatology, Palaeoecology 457:195-208.
294	ExTrAn	Laguna La Pava	696	-71.5233	-44.2797	53	112500	Neotoma		Iglesias, V., V. Markgraf, and C. Whitlock. 2016. 17,000 years of vegetation, fire and climate change in the eastern foothills of the Andes (lat. 44Â°S). Palaeogeography, Palaeoclimatology, Palaeoecology 457:195-208.
295	ExTrAn	Mallín Fontanito	939	-71.5644	-44.9086	19	17042	Neotoma	Neotoma	Nanavati, W., C. Whitlock, V. Iglesias, and M.E. de Porras. 2019. Postglacial vegetation, fire, and climate history along the eastern Andes, Argentina and Chile (lat. 41–55°S). Quaternary Science Reviews
296	ExTrAn	Mallin Pollux	710	-71.8397	-45.6897	-47	17657	Neotoma	Neotoma	Markgraf, V., C. Whitlock, and S. Haberle. 2007. Vegetation and fire history during the last 18,000 cal yr B.P. in Southern Patagonia: Mallín Pollux, Coyhaique, Province Aisén (45°41S, 71°50 W, 640 m elevation). Palaeogeography, Palaeoclimatology, Palaeoecology 254(3-4):492-507.
297	ExTrAn	MD07-3088	-1000	-75.6836	-46.0669	993	21496	Manually extracted		Montade, V., Combourieu Nebout, N., Kissel, C., Haberle, S.G., Siani, G., Michel, E., 2013. Vegetation and climate changes during the last 22,000yr from a marine core near Taitao Peninsula, southern Chile. Palaeogeogr. Palaeoclimatol. Palaeoecol. 369, 335–348.
298	ExTrAn	La Esperanza	671	-72.8333	-46.6333	7	232	Neotoma		Graf, K. 1992. Pollendiagramme aus den Anden: Eine Synthese zur Klimageschichte und Vegetationsentwicklung seit der letzten Eiszeit. Physische Geographie 34. Universität Zürich-Irchel, Geographisches Institut, Zürich, Switzerland.
299	ExTrAn	Mallin Casanova	227	-72.9752	-47.6436	-66	10322	Neotoma		Iglesias, V., S.G. Haberle, A. Holz, and C. Whitlock. 2018. Holocene dynamics of temperate rainforests in west-central Patagonia. Frontiers in Ecology and Evolution 5:177.
300	ExTrAn	Témpano Sur	173	-74.0153	-48.7328	11407	13767	Neotoma		Ashworth, A.C., and V. Markgraf. 1989. Climate of the Chilean Channels between 11,000 and 10,000 yr B.P. based on fossil beetle and pollen analyses. Revista Chilena de Historia Natural 62:61-74.
301	-	Lago Cardiel	285	-71.257	-48.9413	47	10924	Neotoma	Neotoma	Markgraf, V., J.P. Bradbury, A. Schwalb, S.J. Burns, C. Stern, D. Ariztegui, A. Gilli, F.A. Anselmetti, S. Stine, and N. Maidana. 2003. Holocene palaeoclimates of southern Patagonia: limnological and environmental history of Lago Cardiel, Argentina. The Holocene 13(4):581-591.
302	ExTrAn	Puerto Edén	214	-74.4323	-49.1301	0	14741	Neotoma		Ashworth, A.C., V. Markgraf, and C. Villagrán. 1991. Late Quaternary climatic history of the Chilean Channels based on fossil pollen and beetle analyses, with an analysis of the modern vegetation and pollen rain. Journal of Quaternary Science 6:279-291..
303	ExTrAn	Moreno Glacier Bog	360	-73	-50.4667	0	9550	Neotoma		Mercer, J.H., and T.A. Ager. 1983. Glacial and floral changes in southern Argentina since 14,000 years ago. National Geographic Society Research Reports 15:457-477.
304	ExTrAn	Meseta Latorre 2	942	-72.05	-51.5167	245	7119	Neotoma		Schäbitz, F. 1991. Holocene vegetation and climate in southern Santa Cruz, Argentina. Bamberger Geographische Schriften 11:235-244.
305	ExTrAn	Meseta Latorre 1	942	-72.05	-51.5167	63	5269	Neotoma		Schäbitz, F. 1991. Holocene vegetation and climate in southern Santa Cruz, Argentina. Bamberger Geographische Schriften 11:235-244.
306	ExTrAn	Cueva Milodon	92	-72.6333	-51.5833	10832	13470	Neotoma		Markgraf, V. 1985. Late Pleistocene faunal extinction in southern Patagonia. Science 228:1110-1112..
307	-	Surf Bay	16	-57.7869	-51.7019	41	14030	Neotoma		Groff, D.V., K.M. Hamley, T.J.R. Lessard, K.E. Greenawalt, M. Yasuhara, P. Brickle, and J.L. Gill. 2020. Seabird establishment during regional cooling drove a terrestrial ecosystem shift 5000 years ago. Science Advances 6(43):eabb2788.
308	-	Mount Usborne	351	-58.8141	-51.7039	516	13273		Neotoma	Hamley, K.M., J.L. Gill, K.E. Krasinski, D.V. Groff, B.L. Hall, D.H. Sandweiss, J.R. Southon, P. Brickle, and T.V. Lowell. 2021. Evidence of prehistoric human activity in the Falkland Islands. Science Advances 7.
309	-	New Island	60	-61.3056	-51.7193	-57	7963		Neotoma	Hamley, K.M., J.L. Gill, K.E. Krasinski, D.V. Groff, B.L. Hall, D.H. Sandweiss, J.R. Southon, P. Brickle, and T.V. Lowell. 2021. Evidence of prehistoric human activity in the Falkland Islands. Science Advances 7.
310	ExTrAn	Rio Rubens Bog	181	-71.8781	-52.0375	-46	17551	Neotoma	Neotoma	Huber, U.M., V. Markgraf, and F. Schäbitz. 2004. Geographical and temporal trends in Late Quaternary fire histories of Fuego-Patagonia, South America. Quaternary Science Reviews 23(9-10):1079-1097.
311	ExTrAn	La Mision	78	-68.4	-53.5	0	11730	Neotoma		Markgraf, V. 1983. Late and postglacial vegetational and paleoclimatic changes in subantarctic, temperate, and arid environments in Argentina. Palynology 7(1):43-70.
312	ExTrAn	Puerto del Hambre	44	-70.94	-53.6	51	19338		Reading Palaeofire	McCulloch, R.D., Davies, S.J., 2001. Late-glacial and Holocene palaeoenvironmental change in the central Strait of Magellan, southern Patagonia. Palaeogeography, Palaeoclimatology, Palaeoecology 173, 143–173.
313	ExTrAn	Isla Clarence	134	-71.2333	-54.2	85	11633	Neotoma		Markgraf, V. 1983. Late and postglacial vegetational and paleoclimatic changes in subantarctic, temperate, and arid environments in Argentina. Palynology 7(1):43-70.
314	ExTrAn	Yehuin	68	-67.75	-54.3333	226	12622	Neotoma		Markgraf, V. 1983. Late and postglacial vegetational and paleoclimatic changes in subantarctic, temperate, and arid environments in Argentina. Palynology 7(1):43-70.
315	ExTrAn	Paso Garibaldi	437	-67.8333	-54.7167	-40	14746	Neotoma		Markgraf, V. 1993. Paleoenvironments and paleoclimates in Tierra del Fuego and southernmost Patagonia, South America. Palaeogeography, Palaeoclimatology, Palaeoecology 102(1-2):53-68.
316	ExTrAn	Harberton	94	-67.2968	-54.8708	125	14938	Neotoma	Neotoma	Markgraf, V. 1991. Younger Dryas in southern South America?. Boreas 20(1):63-69.
317	ExTrAn	Punta Burslem	87	-67.9532	-54.9016	947	15568	Manually extracted		McCulloch, R.D., Blaikie, J., Jacob, B., Mansilla, C.A., Morello, F., De Pol-Holz, R., San Román, M., Tisdall, E., Torres, J., 2020. Late glacial and Holocene climate variability, southernmost Patagonia. Quat. Sci. Rev. 229, 1–14.

## Sheet: Comp hw1000-yr
binhw: 20-yr | hw: 1000-yr	SAn AP z-scores				SAn charcoal influx z-scores				SESA AP z-scores				SESA charcoal influx z-scores				CEB AP z-scores				CEB charcoal influx z-scores				NEB AP z-scores				TrAn AP z-scores				TrAn charcoal influx z-scores				Amazonia AP z-scores				Amazonia charcoal influx z-scores				NNeo AP z-scores				NNeo charcoal influx z-scores
Age (yr BP)	LocFit	Mean (of boot)	c0.025	c0.975	LocFit	Mean (of boot)	c0.025	c0.975	LocFit	Mean (of boot)	c0.025	c0.975	LocFit	Mean (of boot)	c0.025	c0.975	LocFit	Mean (of boot)	c0.025	c0.975	LocFit	Mean (of boot)	c0.025	c0.975	LocFit	Mean (of boot)	c0.025	c0.975	LocFit	Mean (of boot)	c0.025	c0.975	LocFit	Mean (of boot)	c0.025	c0.975	LocFit	Mean (of boot)	c0.025	c0.975	LocFit	Mean (of boot)	c0.025	c0.975	LocFit	Mean (of boot)	c0.025	c0.975	LocFit
0	0.311584	0.260898	-0.312579	0.726401	0.0972713	0.0972356	-0.396131	0.558407	1.0137	0.984232	0.60468	1.16975	-0.0586965	-0.0150504	-0.372636	0.661026	0.678452	0.604075	-0.00901427	0.935789	-0.755578	-0.631486	-1.66813	0.413727	0.140238	-0.360419	-2.7318	0.466616	0.0217433	0.0350292	-0.241346	0.295306	-0.0431136	-0.0596384	-0.512164	0.472613	0.665791	0.686541	0.215778	1.06764	-0.111077	-0.152911	-0.630667	0.422632	0.306684	0.304981	-0.15437	0.853328	-0.483741
40	0.309925	0.265105	-0.308652	0.725564	0.0956666	0.093412	-0.391728	0.5558	1.01426	0.986616	0.599553	1.16989	-0.0586013	-0.0147656	-0.363906	0.639586	0.675318	0.608552	0.00791151	0.93735	-0.756006	-0.64427	-1.66918	0.403045	0.151726	-0.351673	-2.66623	0.459368	0.0205579	0.0344743	-0.244804	0.293204	-0.0441406	-0.0607392	-0.507864	0.466729	0.664114	0.687438	0.222358	1.06886	-0.111562	-0.153414	-0.627848	0.416673	0.305071	0.306974	-0.145745	0.855258	-0.482471
80	0.309095	0.27099	-0.297315	0.712338	0.0940938	0.0899721	-0.382888	0.540109	1.01475	0.988533	0.609698	1.16873	-0.0581693	-0.014486	-0.353704	0.615105	0.671682	0.612606	0.0154545	0.935683	-0.754095	-0.654602	-1.67986	0.394885	0.157315	-0.345026	-2.60106	0.476721	0.0172333	0.0311965	-0.248163	0.286554	-0.0436077	-0.0593634	-0.501441	0.456096	0.660771	0.686052	0.225814	1.06408	-0.109641	-0.150416	-0.622125	0.398647	0.302593	0.307862	-0.140221	0.85034	-0.477608
120	0.309191	0.27863	-0.267301	0.708191	0.0925826	0.0870001	-0.378071	0.524083	1.01516	0.989982	0.613696	1.16691	-0.0574485	-0.0142154	-0.344776	0.584657	0.667695	0.61617	0.0268489	0.932451	-0.750026	-0.661868	-1.66901	0.387354	0.156584	-0.341279	-2.54249	0.489901	0.011768	0.0248709	-0.249595	0.275681	-0.0415139	-0.0553293	-0.489111	0.450905	0.655829	0.682128	0.230518	1.05283	-0.105429	-0.143846	-0.612931	0.390269	0.299321	0.307565	-0.126685	0.842555	-0.469178
160	0.310311	0.288123	-0.234654	0.712121	0.0911625	0.0845693	-0.367576	0.510776	1.01545	0.990921	0.614518	1.16251	-0.0564868	-0.0139796	-0.336346	0.562851	0.663506	0.619211	0.0557648	0.928696	-0.743979	-0.665664	-1.64427	0.383689	0.149204	-0.340676	-2.47961	0.515692	0.00416071	0.0151564	-0.249595	0.256618	-0.0378581	-0.0485615	-0.478764	0.432622	0.649357	0.675468	0.239443	1.04092	-0.0990359	-0.133661	-0.598503	0.379175	0.295326	0.305991	-0.121429	0.831236	-0.457208
200	0.312554	0.299114	-0.201602	0.711799	0.0898632	0.0830025	-0.356135	0.491646	1.01529	0.991231	0.648089	1.15782	-0.0553322	-0.0138302	-0.32851	0.535497	0.659265	0.621651	0.0834582	0.915547	-0.736133	-0.665944	-1.62919	0.381755	0.135903	-0.343673	-2.41605	0.522009	-0.00558987	0.00289278	-0.252073	0.237505	-0.0326392	-0.0396268	-0.456265	0.414382	0.641424	0.666385	0.247101	1.03022	-0.0905757	-0.120839	-0.559961	0.378291	0.290678	0.303163	-0.115438	0.801758	-0.441723
240	0.316017	0.31116	-0.175899	0.707988	0.0889753	0.0827639	-0.352988	0.473585	1.01457	0.990689	0.656916	1.15358	-0.0540324	-0.014082	-0.320515	0.522793	0.655122	0.62356	0.111315	0.904216	-0.726668	-0.663566	-1.60101	0.38885	0.11722	-0.350569	-2.34574	0.508457	-0.0174851	-0.01027	-0.255853	0.215834	-0.025856	-0.0292858	-0.427968	0.396094	0.632098	0.655886	0.252504	1.01648	-0.0801604	-0.106995	-0.534378	0.373847	0.285448	0.299128	-0.106723	0.76816	-0.422749
280	0.320798	0.323985	-0.134938	0.712206	0.0894838	0.0839053	-0.3417	0.459907	1.01331	0.989263	0.683006	1.14697	-0.0526355	-0.0148456	-0.319638	0.499639	0.651226	0.625118	0.132916	0.897434	-0.715765	-0.659495	-1.57374	0.385501	0.0935154	-0.361012	-2.27415	0.48269	-0.0314889	-0.0240861	-0.258117	0.194369	-0.0175075	-0.0182089	-0.395117	0.380236	0.621448	0.644338	0.260605	0.999814	-0.0679025	-0.0923458	-0.510806	0.371722	0.279708	0.2938	-0.0948459	0.745712	-0.400311
320	0.326995	0.337209	-0.110812	0.714611	0.0914545	0.0864867	-0.32416	0.445367	1.01152	0.987015	0.689494	1.14065	-0.0511894	-0.0161145	-0.325075	0.487005	0.647726	0.6264	0.163714	0.881866	-0.703603	-0.654256	-1.54338	0.378196	0.0651509	-0.374467	-2.20681	0.457691	-0.0456712	-0.0377141	-0.259116	0.169645	-0.0075926	-0.00694981	-0.36968	0.373341	0.609542	0.631868	0.265988	0.978951	-0.0539144	-0.077466	-0.482489	0.373052	0.273527	0.287139	-0.0850858	0.722043	-0.374437
360	0.334707	0.350615	-0.0727639	0.717189	0.094858	0.0904598	-0.30445	0.440388	1.00922	0.984004	0.675432	1.13415	-0.049742	-0.0178885	-0.327839	0.481815	0.644774	0.627486	0.191117	0.862931	-0.690362	-0.647852	-1.49787	0.378607	0.0324872	-0.390538	-2.13845	0.420186	-0.0589406	-0.0507851	-0.258958	0.147498	0.00388989	0.00439216	-0.338718	0.369769	0.596448	0.618563	0.262747	0.964517	-0.0383086	-0.0624425	-0.454956	0.375143	0.266976	0.279143	-0.0798685	0.702608	-0.345193
400	0.34403	0.364058	-0.0415566	0.709696	0.0996647	0.0958109	-0.296475	0.439419	1.00643	0.980257	0.653407	1.1262	-0.0483413	-0.0201482	-0.3317	0.469896	0.642517	0.628483	0.221014	0.858703	-0.676221	-0.640258	-1.43666	0.365833	-0.00411455	-0.408725	-2.06924	0.385563	-0.0712925	-0.0632571	-0.257839	0.125618	0.016941	0.015753	-0.311331	0.357146	0.582342	0.604527	0.257699	0.942296	-0.0211973	-0.0472547	-0.432904	0.378075	0.260125	0.269799	-0.0804038	0.675455	-0.314746
440	0.355064	0.377378	-0.01032	0.706448	0.105845	0.102498	-0.289973	0.437684	1.00315	0.975675	0.632322	1.12404	-0.0470351	-0.0228419	-0.341074	0.452307	0.641106	0.62946	0.255525	0.841274	-0.661362	-0.631373	-1.40447	0.359815	-0.0442933	-0.428658	-1.9976	0.342575	-0.0827225	-0.0749075	-0.260301	0.104402	0.0309277	0.0271481	-0.277233	0.359317	0.567796	0.589895	0.258673	0.924383	-0.00269322	-0.031889	-0.410302	0.382249	0.252307	0.259076	-0.0808493	0.65054	-0.284411
480	0.367321	0.390408	0.0243608	0.70062	0.11337	0.11047	-0.278882	0.442447	0.999403	0.970207	0.593634	1.11952	-0.0458715	-0.0259617	-0.34782	0.440381	0.640629	0.630317	0.290481	0.819542	-0.645963	-0.621227	-1.36247	0.347746	-0.087688	-0.450013	-1.92625	0.302945	-0.0932261	-0.085743	-0.258028	0.0827869	0.0444314	0.0385944	-0.249738	0.353004	0.552966	0.574815	0.26217	0.905068	0.0167476	-0.0162914	-0.381925	0.382604	0.242943	0.246929	-0.0802987	0.62169	-0.254327
520	0.380057	0.403	0.0491262	0.70621	0.12221	0.119608	-0.263709	0.446435	0.995205	0.963915	0.556496	1.11552	-0.0449905	-0.0294876	-0.353068	0.423528	0.640665	0.630941	0.31327	0.802876	-0.630205	-0.609958	-1.32089	0.339762	-0.133938	-0.472523	-1.85531	0.26594	-0.102799	-0.0957674	-0.260991	0.0617117	0.0573561	0.0500353	-0.225196	0.345216	0.537945	0.559387	0.267971	0.882318	0.0358174	-0.000504151	-0.353926	0.38964	0.232052	0.23334	-0.0861274	0.595495	-0.22463
560	0.393032	0.414972	0.0782599	0.703352	0.132335	0.129824	-0.251922	0.453155	0.990569	0.956852	0.532167	1.11602	-0.0449608	-0.0333462	-0.366332	0.406077	0.641029	0.631224	0.340834	0.785647	-0.614267	-0.597656	-1.28319	0.31994	-0.182681	-0.495899	-1.78258	0.227469	-0.111436	-0.104988	-0.262814	0.0460351	0.0696551	0.0614123	-0.205217	0.352755	0.522825	0.543709	0.264412	0.863727	0.0543563	0.0154359	-0.330432	0.398431	0.219654	0.218311	-0.0955273	0.567206	-0.195456
600	0.406004	0.426145	0.105079	0.704234	0.143716	0.141081	-0.225644	0.466704	0.985511	0.949045	0.496638	1.11564	-0.0458388	-0.0375245	-0.379096	0.398686	0.641625	0.63108	0.363385	0.768274	-0.598701	-0.584272	-1.25212	0.330194	-0.233558	-0.519945	-1.71271	0.181283	-0.119133	-0.113464	-0.263204	0.0339045	0.0812815	0.0727432	-0.183716	0.359449	0.507697	0.527847	0.263775	0.841559	0.0723138	0.0315667	-0.310287	0.405242	0.205767	0.201833	-0.101988	0.534154	-0.166942
640	0.418733	0.436366	0.136459	0.704342	0.156323	0.153308	-0.199325	0.47194	0.980046	0.940515	0.452782	1.1184	-0.0475846	-0.0420027	-0.400525	0.398261	0.642359	0.63043	0.395645	0.759126	-0.58401	-0.569773	-1.20284	0.305681	-0.286206	-0.544509	-1.64882	0.1351	-0.125886	-0.121267	-0.260007	0.018316	0.0921888	0.0840024	-0.159148	0.360982	0.492655	0.511892	0.26147	0.815609	0.0896397	0.047895	-0.290391	0.415974	0.190411	0.183889	-0.113358	0.497274	-0.139225
680	0.430979	0.445546	0.164178	0.700659	0.170128	0.166216	-0.187033	0.487407	0.974188	0.931151	0.424032	1.11653	-0.0501587	-0.0468091	-0.423671	0.39452	0.643136	0.629276	0.409857	0.750532	-0.57009	-0.554424	-1.15301	0.28354	-0.339852	-0.569597	-1.58989	0.0878834	-0.131689	-0.128384	-0.263043	0.00728162	0.10233	0.094957	-0.132854	0.365037	0.477791	0.495945	0.25955	0.791903	0.106283	0.0643715	-0.272144	0.426333	0.173606	0.164603	-0.12391	0.467985	-0.112443
720	0.442501	0.453719	0.185419	0.697282	0.185099	0.179215	-0.174577	0.500379	0.967594	0.92033	0.386906	1.117	-0.0535214	-0.0521752	-0.441015	0.404753	0.64386	0.627677	0.426907	0.742705	-0.556835	-0.538756	-1.10486	0.259623	-0.3928	-0.595262	-1.5367	0.0433563	-0.13654	-0.134492	-0.268233	-0.00261125	0.111658	0.105276	-0.110743	0.367746	0.463197	0.480135	0.249595	0.768773	0.122195	0.0807196	-0.254732	0.436194	0.155369	0.144495	-0.134259	0.447778	-0.0867315
760	0.453059	0.460836	0.207483	0.690148	0.201209	0.192217	-0.167264	0.514341	0.958685	0.90803	0.35027	1.11508	-0.057633	-0.0581696	-0.462023	0.416752	0.644435	0.625648	0.435334	0.734397	-0.544137	-0.52325	-1.05417	0.241635	-0.444695	-0.621278	-1.48985	-0.00514102	-0.140432	-0.139528	-0.273916	-0.00712401	0.120128	0.114897	-0.0938153	0.365439	0.448965	0.464528	0.232565	0.749307	0.137323	0.0967992	-0.231418	0.446228	0.135721	0.123824	-0.146958	0.42147	-0.0622278
800	0.462411	0.466891	0.222734	0.688235	0.217591	0.205223	-0.152754	0.52648	0.947512	0.894443	0.312951	1.11374	-0.0624538	-0.064763	-0.486408	0.41289	0.644768	0.623145	0.44393	0.728538	-0.531889	-0.508012	-0.99692	0.240349	-0.495295	-0.64708	-1.44421	-0.0513422	-0.143361	-0.143381	-0.278705	-0.0132122	0.12769	0.123827	-0.0859543	0.358719	0.435187	0.449202	0.224512	0.736473	0.151619	0.112356	-0.21542	0.452434	0.11468	0.10266	-0.154991	0.396415	-0.0390685
840	0.470319	0.471902	0.237571	0.683106	0.233191	0.218215	-0.137564	0.545443	0.934348	0.879772	0.274194	1.10781	-0.0679443	-0.0719334	-0.507541	0.419865	0.644762	0.620176	0.450562	0.725913	-0.519985	-0.493001	-0.961945	0.239135	-0.544362	-0.67246	-1.40508	-0.0974277	-0.145316	-0.14597	-0.281877	-0.0172083	0.1343	0.132025	-0.0774303	0.359294	0.421957	0.434237	0.218287	0.720676	0.165031	0.127233	-0.201094	0.461066	0.0922665	0.0811814	-0.175188	0.37384	-0.0173907
880	0.47654	0.475837	0.252578	0.683267	0.247941	0.231111	-0.131003	0.56633	0.919469	0.864234	0.239575	1.102	-0.0740646	-0.0796654	-0.52665	0.422712	0.644323	0.6168	0.44849	0.725465	-0.508317	-0.478211	-0.919931	0.229388	-0.591655	-0.697187	-1.36888	-0.145281	-0.146051	-0.147295	-0.280379	-0.0203859	0.13991	0.139456	-0.0660775	0.361444	0.409365	0.419703	0.203501	0.706458	0.177508	0.141282	-0.184738	0.471683	0.068499	0.0595587	-0.194105	0.341238	0.00266899
920	0.480835	0.478754	0.265619	0.677727	0.261778	0.243895	-0.116295	0.580262	0.903149	0.847995	0.220209	1.09481	-0.0807751	-0.0879952	-0.548291	0.424941	0.643355	0.613049	0.441701	0.722354	-0.496778	-0.463714	-0.878297	0.201359	-0.636934	-0.721155	-1.33635	-0.181217	-0.145539	-0.147375	-0.282414	-0.0158403	0.144474	0.146082	-0.0555553	0.353794	0.397505	0.405689	0.189553	0.695467	0.189002	0.154339	-0.1699	0.479527	0.0433968	0.0378457	-0.223987	0.31246	0.0209736
960	0.482963	0.480679	0.271117	0.67955	0.274637	0.256468	-0.114607	0.596777	0.885663	0.831216	0.192179	1.08767	-0.0880363	-0.0970117	-0.571985	0.432739	0.641763	0.609044	0.434777	0.722006	-0.485263	-0.449608	-0.846933	0.207984	-0.679959	-0.744129	-1.30534	-0.214873	-0.143906	-0.14623	-0.284338	-0.00654332	0.147945	0.151871	-0.045894	0.354705	0.386437	0.392289	0.167127	0.685895	0.199461	0.16626	-0.161285	0.486937	0.0174667	0.0161915	-0.250251	0.281529	0.0373863
1000	0.482704	0.481631	0.276655	0.673595	0.286452	0.268624	-0.110092	0.605272	0.867286	0.814079	0.178174	1.08243	-0.0958083	-0.106684	-0.594228	0.43412	0.639451	0.604987	0.42177	0.725127	-0.473663	-0.435941	-0.813268	0.193023	-0.72049	-0.765778	-1.27756	-0.240671	-0.141277	-0.143886	-0.285486	0.000336777	0.150339	0.156832	-0.0306036	0.34938	0.375263	0.379585	0.146759	0.676815	0.208835	0.176843	-0.152352	0.492533	-0.00766541	-0.0053741	-0.272309	0.257461	0.0518454
1040	0.481417	0.481712	0.284816	0.669754	0.297159	0.280228	-0.101825	0.623162	0.848293	0.796763	0.15867	1.07332	-0.104052	-0.116908	-0.614241	0.437203	0.636337	0.601019	0.418393	0.731049	-0.461871	-0.422822	-0.781182	0.202363	-0.758287	-0.785838	-1.25443	-0.264951	-0.137778	-0.140388	-0.284426	0.0114077	0.152286	0.160946	-0.0201101	0.356041	0.363635	0.367661	0.127036	0.670528	0.217073	0.185939	-0.148532	0.495439	-0.0319227	-0.0268623	-0.289793	0.236155	0.0645358
1080	0.480035	0.480974	0.292022	0.665317	0.306694	0.291306	-0.0907674	0.6369	0.828957	0.779432	0.141594	1.06659	-0.112709	-0.127579	-0.635106	0.445237	0.633174	0.597213	0.408563	0.737237	-0.449782	-0.410379	-0.751211	0.176382	-0.79311	-0.804057	-1.23174	-0.281853	-0.133533	-0.135777	-0.284035	0.0178545	0.153966	0.164197	-0.0139576	0.354615	0.351693	0.356611	0.110188	0.658868	0.223763	0.193418	-0.138357	0.499511	-0.0553639	-0.0482981	-0.322667	0.216841	0.0755836
1120	0.478545	0.479474	0.298594	0.662966	0.314992	0.301828	-0.074719	0.650941	0.809555	0.762232	0.126528	1.06127	-0.121555	-0.138592	-0.653384	0.44974	0.630417	0.593642	0.395655	0.745913	-0.437287	-0.398758	-0.729499	0.180047	-0.824718	-0.820022	-1.21252	-0.295207	-0.12867	-0.130089	-0.281398	0.02441	0.155386	0.166617	-0.0121703	0.354349	0.339579	0.346474	0.102158	0.648204	0.228558	0.19916	-0.130083	0.499431	-0.0780473	-0.0697164	-0.352075	0.210521	0.0851084
1160	0.476932	0.477354	0.30713	0.655371	0.321987	0.311699	-0.0624652	0.656832	0.790361	0.745293	0.104671	1.05487	-0.130501	-0.149782	-0.677752	0.463265	0.62799	0.590361	0.378916	0.75763	-0.424635	-0.388176	-0.710648	0.159601	-0.852873	-0.83342	-1.19222	-0.307452	-0.123312	-0.123427	-0.278339	0.0308723	0.156552	0.16834	-0.00809252	0.357642	0.32743	0.337223	0.0829077	0.64471	0.231583	0.203111	-0.123039	0.499136	-0.100032	-0.0911375	-0.372033	0.198643	0.0932292
1200	0.475184	0.474988	0.308837	0.650062	0.327616	0.320473	-0.0518375	0.662669	0.77165	0.728218	0.100116	1.04476	-0.139508	-0.160776	-0.69254	0.467508	0.625821	0.587286	0.360699	0.764192	-0.414064	-0.378729	-0.698619	0.183868	-0.876222	-0.84405	-1.17704	-0.332603	-0.117586	-0.116542	-0.274793	0.0429968	0.15747	0.169532	-0.0094718	0.36575	0.315388	0.328374	0.0659385	0.636451	0.232964	0.205312	-0.115235	0.497021	-0.121375	-0.112436	-0.389029	0.178272	0.100066
1240	0.473285	0.472555	0.31053	0.649771	0.331813	0.327911	-0.0448192	0.666592	0.753696	0.710755	0.102728	1.03373	-0.148534	-0.171438	-0.711912	0.480815	0.623832	0.584319	0.346595	0.777024	-0.405735	-0.370453	-0.673509	0.184979	-0.893354	-0.851716	-1.16464	-0.348903	-0.111617	-0.109767	-0.2721	0.0544805	0.158149	0.170288	-0.00746767	0.375215	0.303592	0.319626	0.0499391	0.631949	0.232825	0.205894	-0.10529	0.489624	-0.142137	-0.133527	-0.410894	0.16834	0.105737
1280	0.471223	0.470161	0.307255	0.645104	0.334514	0.333901	-0.0441178	0.666714	0.735724	0.693106	0.107983	1.02534	-0.157542	-0.181697	-0.729677	0.494182	0.62195	0.581434	0.324442	0.787279	-0.399342	-0.363243	-0.660741	0.172468	-0.904551	-0.856155	-1.15402	-0.355632	-0.10553	-0.103411	-0.272491	0.0615218	0.158595	0.170682	-0.0104913	0.384102	0.292182	0.311018	0.0404184	0.627183	0.231293	0.205075	-0.098074	0.481905	-0.162376	-0.15434	-0.432132	0.164966	0.110362
1320	0.468983	0.467884	0.303419	0.643391	0.3357	0.338354	-0.039382	0.66981	0.716362	0.6755	0.109797	1.01324	-0.16649	-0.191451	-0.748727	0.496219	0.6201	0.578523	0.302051	0.798018	-0.394579	-0.357095	-0.664383	0.206369	-0.910101	-0.857155	-1.14932	-0.363802	-0.0994512	-0.0978167	-0.267136	0.0723732	0.158814	0.170729	-0.0169086	0.39499	0.281298	0.302636	0.0302517	0.623277	0.228494	0.203037	-0.0959093	0.471281	-0.182149	-0.174788	-0.4504	0.141683	0.114061
1360	0.466551	0.465699	0.302788	0.642577	0.33613	0.341228	-0.032564	0.66582	0.695906	0.658091	0.103487	1.00126	-0.175339	-0.200621	-0.762075	0.495277	0.618207	0.575357	0.276154	0.806499	-0.391141	-0.351959	-0.665011	0.212265	-0.910294	-0.854464	-1.14597	-0.35734	-0.0935059	-0.0930627	-0.265917	0.0782419	0.158813	0.170455	-0.0268165	0.401727	0.27108	0.294601	0.0189247	0.623905	0.224551	0.199954	-0.0952025	0.466962	-0.201516	-0.194764	-0.468859	0.125513	0.116953
1400	0.463915	0.463614	0.301328	0.641722	0.336104	0.34251	-0.0209547	0.655563	0.674673	0.640942	0.105956	0.991092	-0.184049	-0.209143	-0.769317	0.492493	0.616196	0.571804	0.254986	0.813669	-0.388722	-0.347731	-0.661156	0.217741	-0.90542	-0.847753	-1.14379	-0.346148	-0.0878468	-0.0892625	-0.267102	0.0848159	0.1586	0.169896	-0.0377626	0.406973	0.261667	0.287046	0.00421539	0.629955	0.219592	0.195998	-0.0918617	0.453798	-0.220535	-0.214131	-0.486199	0.113406	0.119157
1440	0.461059	0.461587	0.298915	0.642045	0.33563	0.34219	-0.0147328	0.647487	0.65298	0.624112	0.108652	0.981252	-0.19258	-0.217007	-0.778887	0.488612	0.613992	0.567756	0.232935	0.820358	-0.387016	-0.344173	-0.658063	0.222897	-0.895768	-0.836955	-1.13711	-0.32544	-0.0833133	-0.0864918	-0.268877	0.087808	0.158181	0.169076	-0.0469592	0.413081	0.2532	0.280108	-0.0112946	0.626647	0.213742	0.191319	-0.0933603	0.44532	-0.239265	-0.232724	-0.503024	0.0975131	0.120792
1480	0.45797	0.459614	0.297673	0.643319	0.334716	0.340364	-0.0133164	0.63484	0.631145	0.607788	0.119564	0.969837	-0.200893	-0.22417	-0.78353	0.489641	0.611521	0.562996	0.215139	0.825714	-0.38572	-0.341031	-0.65897	0.221121	-0.881627	-0.822016	-1.13707	-0.303789	-0.0801778	-0.0847636	-0.270959	0.0936303	0.157563	0.168015	-0.0563756	0.418642	0.245818	0.273928	-0.028951	0.630665	0.207125	0.186083	-0.0922726	0.433061	-0.257689	-0.250387	-0.518071	0.0696996	0.121979
1520	0.454634	0.457721	0.293136	0.643698	0.333371	0.337191	-0.0121089	0.62734	0.609485	0.592196	0.110967	0.959345	-0.208947	-0.230629	-0.785514	0.486188	0.608707	0.557406	0.189186	0.828615	-0.384526	-0.338089	-0.662743	0.242224	-0.863288	-0.802978	-1.12607	-0.273202	-0.0783394	-0.0840678	-0.270905	0.0986456	0.156752	0.166714	-0.0685405	0.422501	0.239661	0.26863	-0.0403842	0.63507	0.199868	0.180417	-0.0913576	0.428281	-0.2744	-0.266966	-0.533798	0.0701256	0.122835
1560	0.451056	0.455879	0.291791	0.645629	0.331602	0.332628	-0.000443861	0.608559	0.588318	0.577532	0.115436	0.949926	-0.216703	-0.23638	-0.787944	0.479183	0.605476	0.550958	0.161875	0.833065	-0.383129	-0.335108	-0.665202	0.251803	-0.841039	-0.779999	-1.11271	-0.231737	-0.0776974	-0.084368	-0.273714	0.0960711	0.155756	0.165147	-0.082018	0.430994	0.235089	0.26433	-0.047578	0.642943	0.192097	0.174414	-0.0903876	0.426048	-0.288939	-0.282314	-0.547995	0.0570428	0.123481
1600	0.447568	0.45405	0.289079	0.641818	0.329419	0.32676	-0.000544362	0.597233	0.567959	0.563914	0.12267	0.93883	-0.224121	-0.241417	-0.785707	0.484146	0.601753	0.54368	0.136345	0.833488	-0.381224	-0.331869	-0.67442	0.272057	-0.81517	-0.753579	-1.10129	-0.181911	-0.078151	-0.0856239	-0.277763	0.0949793	0.153944	0.16325	-0.0975587	0.436554	0.232475	0.261151	-0.0536157	0.642934	0.183936	0.168106	-0.0918648	0.423473	-0.301429	-0.296287	-0.564751	0.0453191	0.124023
1640	0.444323	0.452163	0.289271	0.638241	0.32683	0.319675	-0.00599189	0.589238	0.548728	0.551476	0.132479	0.93012	-0.231143	-0.245686	-0.786678	0.494862	0.597438	0.535664	0.118141	0.831963	-0.378506	-0.328146	-0.679228	0.27708	-0.785971	-0.724439	-1.08061	-0.147065	-0.0795992	-0.0877861	-0.28236	0.0979575	0.150666	0.160858	-0.114329	0.438701	0.231696	0.259211	-0.0574804	0.646015	0.175498	0.161526	-0.0952551	0.420387	-0.311993	-0.308731	-0.58161	0.0351585	0.124369
1680	0.441341	0.450254	0.290602	0.635847	0.323844	0.312627	0.00652228	0.585566	0.530941	0.539827	0.13482	0.919453	-0.237325	-0.248987	-0.785624	0.50405	0.592472	0.527135	0.0971002	0.832469	-0.374668	-0.323796	-0.692078	0.295791	-0.75378	-0.693369	-1.05033	-0.0942308	-0.0819414	-0.0905243	-0.284273	0.096176	0.146033	0.157436	-0.129788	0.448578	0.232621	0.258594	-0.0656403	0.655882	0.166675	0.154611	-0.0990624	0.415413	-0.320754	-0.319264	-0.594747	0.0202185	0.12452
1720	0.438646	0.448442	0.289927	0.63292	0.320468	0.30653	0.00647432	0.575216	0.514916	0.528248	0.136833	0.909779	-0.24248	-0.251286	-0.791674	0.514454	0.586905	0.51829	0.0666771	0.830527	-0.369406	-0.318746	-0.701967	0.305491	-0.720713	-0.661238	-1.01263	-0.0760867	-0.0850767	-0.0935614	-0.292493	0.0938906	0.140154	0.152852	-0.140381	0.44767	0.235116	0.259302	-0.0695032	0.659016	0.157428	0.14728	-0.112019	0.414976	-0.327834	-0.327692	-0.604694	0.0153266	0.124536
1760	0.436258	0.446741	0.289044	0.63	0.316711	0.301483	0.00566651	0.569012	0.500969	0.516756	0.12876	0.900871	-0.246593	-0.252592	-0.788057	0.518277	0.580788	0.509265	0.0492292	0.825573	-0.363009	-0.312976	-0.704362	0.298924	-0.68782	-0.629043	-0.977886	-0.0375174	-0.0889043	-0.0967871	-0.301455	0.0932709	0.13314	0.14707	-0.15296	0.447705	0.239051	0.261233	-0.0701422	0.666327	0.147781	0.139485	-0.116816	0.412475	-0.333355	-0.334062	-0.610654	0.0117204	0.124477
1800	0.434199	0.445192	0.287321	0.627126	0.312582	0.297468	0.0156823	0.564067	0.48939	0.505477	0.12649	0.89266	-0.249646	-0.252897	-0.789789	0.520656	0.574171	0.500172	0.0255262	0.819708	-0.355964	-0.306496	-0.708068	0.295061	-0.65518	-0.597299	-0.951488	-0.00586721	-0.0933234	-0.100033	-0.305008	0.0894108	0.125101	0.140177	-0.167014	0.450176	0.244294	0.264275	-0.0699655	0.670944	0.137756	0.131164	-0.142271	0.412266	-0.337442	-0.338501	-0.613128	0.00451212	0.124403
1840	0.432492	0.443819	0.287293	0.626868	0.308088	0.294478	0.00989514	0.566088	0.479326	0.494499	0.121173	0.883512	-0.251624	-0.252193	-0.792133	0.522235	0.567106	0.491179	0.00538087	0.813531	-0.348307	-0.299323	-0.710584	0.293319	-0.622872	-0.566404	-0.913562	0.0449959	-0.0982332	-0.103291	-0.314341	0.0823106	0.116147	0.132293	-0.182813	0.450267	0.250712	0.268329	-0.0717348	0.676418	0.127377	0.122251	-0.154678	0.406009	-0.340216	-0.341192	-0.620287	-0.000777894	0.124372
1880	0.431159	0.442628	0.286236	0.623819	0.30348	0.292602	0.00819803	0.565931	0.470151	0.483865	0.104827	0.873986	-0.25251	-0.250428	-0.792285	0.52273	0.559643	0.482368	-0.00932482	0.808287	-0.340076	-0.291507	-0.712265	0.310942	-0.590976	-0.53675	-0.875939	0.0705149	-0.103533	-0.106567	-0.317781	0.0809028	0.106387	0.123562	-0.202651	0.447597	0.258173	0.273294	-0.0744449	0.688973	0.116668	0.112687	-0.172046	0.403494	-0.3418	-0.342328	-0.621432	-0.00527259	0.124446
1920	0.430221	0.441637	0.285384	0.62571	0.299721	0.291854	0.014157	0.564433	0.461722	0.473565	0.0786776	0.86581	-0.252287	-0.247542	-0.789757	0.522597	0.551834	0.473778	-0.0232751	0.800086	-0.331307	-0.283079	-0.713428	0.3364	-0.559572	-0.508547	-0.843311	0.104766	-0.109121	-0.109859	-0.325128	0.0783957	0.095933	0.114128	-0.219745	0.443434	0.266547	0.279072	-0.0731097	0.694234	0.105653	0.102432	-0.186878	0.39793	-0.342317	-0.342124	-0.623247	-0.00980848	0.124685
1960	0.429701	0.440826	0.282844	0.6279	0.296925	0.292158	0.0172034	0.563546	0.453901	0.463595	0.068168	0.856557	-0.250939	-0.243549	-0.787179	0.530885	0.543729	0.465508	-0.0384235	0.791639	-0.322038	-0.274124	-0.721676	0.338492	-0.528739	-0.481898	-0.81178	0.104313	-0.114887	-0.113218	-0.333414	0.074768	0.0848936	0.104137	-0.232322	0.447476	0.275699	0.285553	-0.0732013	0.704106	0.0943555	0.0914982	-0.205545	0.390512	-0.341889	-0.340796	-0.621179	-0.0187105	0.125147
2000	0.42962	0.440209	0.281705	0.627534	0.295103	0.293421	0.0212328	0.566973	0.446547	0.453971	0.0618988	0.849841	-0.24845	-0.238506	-0.782458	0.536382	0.53538	0.457596	-0.0413494	0.78132	-0.312304	-0.264705	-0.721741	0.339117	-0.498556	-0.456737	-0.778744	0.137389	-0.120507	-0.116705	-0.338264	0.0715933	0.0733794	0.0937416	-0.248958	0.451377	0.2855	0.292644	-0.0730592	0.713164	0.0827984	0.0799143	-0.229206	0.382128	-0.34064	-0.338539	-0.619113	-0.01246	0.125893
2040	0.43	0.439811	0.282679	0.627783	0.29427	0.295585	0.0250677	0.570378	0.43952	0.444693	0.0460956	0.847631	-0.244803	-0.232478	-0.776498	0.541439	0.526837	0.449991	-0.0435286	0.769542	-0.302145	-0.254919	-0.720976	0.366113	-0.469104	-0.432831	-0.744356	0.153296	-0.125862	-0.120399	-0.341036	0.0657619	0.0615005	0.0831113	-0.260957	0.445386	0.295816	0.300269	-0.0735208	0.72218	0.0710058	0.0676969	-0.250698	0.371752	-0.338815	-0.335545	-0.614224	-0.0118551	0.126982
2080	0.430864	0.439617	0.282985	0.62504	0.294438	0.298618	0.0330149	0.573571	0.432679	0.435747	0.0272163	0.846098	-0.239981	-0.22553	-0.77053	0.540973	0.518152	0.442615	-0.0521361	0.756061	-0.291596	-0.244896	-0.718689	0.372217	-0.44046	-0.409843	-0.714981	0.16582	-0.130945	-0.124386	-0.344558	0.0646929	0.0493668	0.072514	-0.273956	0.4449	0.306517	0.308352	-0.0741372	0.735447	0.0590011	0.0549482	-0.267893	0.359557	-0.336606	-0.332	-0.612466	-0.0149453	0.128475
2120	0.43214	0.439626	0.280757	0.619683	0.29562	0.302438	0.0434083	0.573124	0.425884	0.427096	0.0054191	0.845858	-0.233968	-0.217854	-0.765419	0.541931	0.509374	0.435413	-0.0529199	0.742707	-0.280694	-0.2349	-0.707666	0.391019	-0.412706	-0.38756	-0.696814	0.18565	-0.135745	-0.128757	-0.347291	0.0643586	0.0370885	0.0622632	-0.285413	0.43923	0.317343	0.316754	-0.0755781	0.747623	0.046808	0.0417553	-0.288499	0.347259	-0.333918	-0.328087	-0.611403	-0.0188954	0.130431
2160	0.433009	0.439717	0.281601	0.619715	0.297831	0.306702	0.0495392	0.576865	0.418995	0.418637	-0.0148731	0.844667	-0.226747	-0.210052	-0.763163	0.560097	0.500557	0.428466	-0.0472088	0.731265	-0.269477	-0.22514	-0.712657	0.417387	-0.38592	-0.365908	-0.705621	0.194369	-0.140255	-0.133462	-0.347434	0.0574028	0.0253841	0.0535103	-0.288883	0.431038	0.327397	0.325086	-0.0740348	0.755679	0.03445	0.0282636	-0.301611	0.334496	-0.330654	-0.32379	-0.608316	-0.0123225	0.132911
2200	0.433277	0.439526	0.281546	0.621428	0.301082	0.311022	0.0547155	0.583452	0.411872	0.410135	-0.028324	0.842926	-0.218316	-0.202791	-0.761278	0.565935	0.49177	0.421888	-0.0442021	0.719669	-0.257981	-0.215968	-0.710036	0.409594	-0.359874	-0.344897	-0.733863	0.197573	-0.144467	-0.138284	-0.352153	0.0556034	0.0170914	0.0468741	-0.293018	0.42442	0.336515	0.332495	-0.0708085	0.76166	0.0219509	0.0146838	-0.317663	0.322957	-0.326718	-0.318865	-0.611909	-0.00983705	0.135973
2240	0.432947	0.438954	0.28065	0.620265	0.305387	0.315394	0.0600506	0.594254	0.404374	0.401554	-0.0447914	0.840833	-0.209728	-0.196176	-0.749863	0.564624	0.483208	0.415769	-0.0521111	0.708629	-0.246243	-0.207576	-0.707944	0.405585	-0.332551	-0.324393	-0.784088	0.199789	-0.14837	-0.143177	-0.35575	0.0489068	0.0123516	0.0427773	-0.294407	0.420255	0.344677	0.338774	-0.0629651	0.765136	0.00938146	0.00109826	-0.332676	0.31202	-0.322011	-0.313234	-0.608897	-0.00523751	0.138245
2280	0.432023	0.437938	0.275883	0.61652	0.310759	0.31988	0.0640971	0.59678	0.39636	0.392939	-0.0556177	0.83682	-0.201639	-0.190211	-0.73642	0.568194	0.474983	0.410216	-0.0576699	0.697797	-0.234302	-0.200058	-0.712053	0.406586	-0.303988	-0.304434	-0.824833	0.200974	-0.151957	-0.148011	-0.35598	0.0446602	0.0109265	0.0413407	-0.295098	0.413816	0.351866	0.343946	-0.0647952	0.765369	-0.00307633	-0.0124214	-0.3503	0.303151	-0.316437	-0.306882	-0.595187	0.00197994	0.137735
2320	0.430507	0.436418	0.269613	0.613998	0.317211	0.324494	0.0702997	0.599558	0.387692	0.384359	-0.0686336	0.831785	-0.194039	-0.184867	-0.7257	0.576258	0.467187	0.405384	-0.0577151	0.688161	-0.222508	-0.193489	-0.713872	0.375737	-0.274695	-0.285223	-0.864566	0.205284	-0.155218	-0.152697	-0.355503	0.0397542	0.0125783	0.0424432	-0.289361	0.412109	0.358063	0.348105	-0.0653004	0.763819	-0.0154258	-0.0258245	-0.36535	0.295007	-0.3099	-0.299806	-0.57843	0.00986195	0.134665
2360	0.428403	0.434399	0.261992	0.613557	0.324757	0.329123	0.0786634	0.602307	0.378361	0.375914	-0.0772163	0.821571	-0.186916	-0.180104	-0.717139	0.58189	0.459915	0.401417	-0.0458912	0.677677	-0.212347	-0.187982	-0.708549	0.418849	-0.245177	-0.266862	-0.905245	0.207393	-0.158145	-0.157168	-0.357893	0.032754	0.0170688	0.0458321	-0.286691	0.411758	0.363251	0.351343	-0.0632005	0.760598	-0.0276883	-0.0390652	-0.378287	0.285266	-0.302301	-0.292025	-0.565681	0.0130963	0.12928
2400	0.425714	0.431886	0.25523	0.60979	0.33341	0.333803	0.0839941	0.604334	0.369123	0.367748	-0.0819258	0.820913	-0.180256	-0.17587	-0.711957	0.585529	0.453259	0.39843	-0.0364541	0.669169	-0.203945	-0.183613	-0.708915	0.421139	-0.215944	-0.249491	-0.938744	0.20479	-0.16073	-0.161342	-0.358446	0.0316698	0.02416	0.0512678	-0.280276	0.408199	0.367412	0.353727	-0.0612061	0.759467	-0.0398852	-0.0521279	-0.38917	0.27694	-0.293543	-0.283615	-0.545449	0.0225988	0.121821
2440	0.422444	0.428867	0.249742	0.608252	0.342382	0.338563	0.0865237	0.605323	0.360214	0.360043	-0.0890149	0.809219	-0.174047	-0.172086	-0.702416	0.590298	0.447312	0.396497	-0.0247377	0.663064	-0.197234	-0.180394	-0.711205	0.398346	-0.187503	-0.23316	-0.969471	0.199316	-0.162963	-0.165148	-0.360669	0.0252255	0.0336138	0.0585036	-0.271616	0.4059	0.370528	0.355232	-0.0639346	0.760608	-0.052038	-0.0650252	-0.39684	0.271135	-0.283531	-0.274631	-0.53615	0.0258764	0.112535
2480	0.418595	0.425335	0.242997	0.605391	0.350582	0.34329	0.0940415	0.609148	0.351746	0.352973	-0.0952853	0.804628	-0.168279	-0.168698	-0.684855	0.589545	0.442168	0.39569	-0.00534838	0.655828	-0.192146	-0.178341	-0.704804	0.389156	-0.160362	-0.217821	-0.997241	0.191379	-0.164836	-0.168518	-0.35967	0.0194568	0.0451923	0.0672708	-0.259928	0.410149	0.37258	0.355895	-0.0667419	0.759692	-0.0641679	-0.0777483	-0.409372	0.266431	-0.272166	-0.265055	-0.530779	0.0303254	0.101663
2520	0.414171	0.421292	0.233664	0.600309	0.357875	0.347926	0.102468	0.616595	0.343834	0.346709	-0.0994781	0.801061	-0.162938	-0.165641	-0.678355	0.590548	0.43792	0.396067	0.0202708	0.651234	-0.188614	-0.177494	-0.701963	0.37811	-0.135029	-0.203331	-1.02168	0.181748	-0.166344	-0.171379	-0.360697	0.0149565	0.0586574	0.0772975	-0.250405	0.420391	0.373551	0.355781	-0.0701898	0.755645	-0.0762965	-0.0902877	-0.421244	0.257054	-0.259351	-0.254867	-0.518274	0.0364347	0.0894495
2560	0.409175	0.416747	0.223521	0.596804	0.364132	0.352459	0.106399	0.622247	0.33659	0.341411	-0.0997106	0.798896	-0.158012	-0.162818	-0.676377	0.585274	0.43466	0.397639	0.040701	0.646689	-0.186569	-0.177889	-0.705211	0.37447	-0.112011	-0.18953	-1.04251	0.17053	-0.167544	-0.173658	-0.361807	0.0133764	0.0737711	0.0883039	-0.248382	0.427056	0.373423	0.354935	-0.0735766	0.745037	-0.0884451	-0.102626	-0.431875	0.244836	-0.245257	-0.244061	-0.511101	0.0555847	0.0761387
2600	0.403611	0.411714	0.214953	0.596498	0.369224	0.356878	0.105872	0.619937	0.330127	0.337238	-0.0985969	0.797281	-0.15349	-0.160095	-0.673857	0.573225	0.432482	0.400332	0.0495976	0.640064	-0.185944	-0.17951	-0.70899	0.367096	-0.0918169	-0.176205	-1.05946	0.157944	-0.168484	-0.175276	-0.35595	0.0142216	0.0902952	0.100004	-0.248978	0.438828	0.372178	0.353391	-0.0727851	0.740062	-0.100635	-0.114765	-0.438774	0.236448	-0.23153	-0.232641	-0.499422	0.0600965	0.061974
2640	0.397481	0.406232	0.20185	0.594487	0.373021	0.360977	0.106662	0.619064	0.324559	0.334272	-0.0981043	0.796568	-0.149358	-0.15718	-0.670279	0.563846	0.431479	0.403657	0.0607852	0.637018	-0.18667	-0.182274	-0.706069	0.350708	-0.0749542	-0.163257	-1.07581	0.146835	-0.169194	-0.176206	-0.355496	0.011685	0.107992	0.111957	-0.248629	0.441001	0.369798	0.351244	-0.0717217	0.732205	-0.112888	-0.126657	-0.450954	0.227915	-0.218462	-0.220784	-0.482243	0.0686367	0.0471992
2680	0.390856	0.400405	0.189756	0.59269	0.375394	0.364115	0.105473	0.618835	0.319998	0.332257	-0.0961098	0.794519	-0.145606	-0.153599	-0.661071	0.550316	0.431744	0.406857	0.0831267	0.63697	-0.18868	-0.186125	-0.715293	0.355555	-0.0619306	-0.150508	-1.07994	0.142925	-0.169702	-0.176612	-0.353124	0.0150814	0.126623	0.123945	-0.244878	0.455186	0.366278	0.348911	-0.0699429	0.721607	-0.125225	-0.138123	-0.46689	0.22321	-0.206046	-0.208969	-0.468751	0.0794545	0.0320577
2720	0.384098	0.39429	0.180974	0.589693	0.376213	0.366042	0.097175	0.61549	0.316558	0.331067	-0.0988428	0.788568	-0.14222	-0.149294	-0.64945	0.549981	0.43337	0.409406	0.104187	0.63417	-0.191907	-0.191035	-0.712893	0.341076	-0.0517827	-0.137386	-1.07742	0.134458	-0.170038	-0.176546	-0.354049	0.0155762	0.145945	0.135873	-0.244281	0.460342	0.362702	0.346633	-0.0683885	0.714854	-0.137667	-0.149084	-0.479086	0.218865	-0.194276	-0.197364	-0.455842	0.085189	0.0167935
2760	0.377307	0.387946	0.170563	0.587356	0.375348	0.366626	0.0940319	0.618308	0.314351	0.330726	-0.0995443	0.787899	-0.139189	-0.144422	-0.639384	0.549452	0.436401	0.411045	0.11724	0.629744	-0.196281	-0.196865	-0.723391	0.330401	-0.0407431	-0.123613	-1.06193	0.12427	-0.170232	-0.176093	-0.355905	0.0203305	0.165433	0.147765	-0.239419	0.475828	0.359713	0.344424	-0.0715586	0.708834	-0.150237	-0.159375	-0.484545	0.214175	-0.183146	-0.186013	-0.439017	0.0885018	0.0016501
2800	0.370543	0.381471	0.159923	0.590143	0.372669	0.365694	0.089005	0.616557	0.313492	0.331172	-0.0897577	0.78331	-0.136344	-0.139145	-0.625307	0.545607	0.439059	0.411552	0.115682	0.627597	-0.201736	-0.203446	-0.750005	0.32003	-0.0285413	-0.108993	-1.03709	0.114097	-0.170313	-0.175323	-0.358171	0.0259945	0.184791	0.159775	-0.233683	0.48616	0.357257	0.342211	-0.0711071	0.706808	-0.162954	-0.168921	-0.49091	0.211115	-0.172649	-0.17495	-0.422452	0.0920253	-0.0131287
2840	0.363862	0.374917	0.144476	0.588954	0.368048	0.363029	0.084301	0.609127	0.314092	0.332299	-0.0872927	0.777821	-0.133438	-0.133656	-0.610092	0.54571	0.440473	0.410749	0.116561	0.624175	-0.208202	-0.210514	-0.769423	0.321765	-0.015125	-0.0933504	-1.00682	0.115029	-0.170309	-0.17428	-0.359612	0.0346669	0.203912	0.172087	-0.225499	0.495386	0.355279	0.339935	-0.0817588	0.699639	-0.175101	-0.177682	-0.497059	0.207898	-0.162779	-0.164175	-0.40622	0.102232	-0.0270234
2880	0.357322	0.368355	0.132091	0.588072	0.361355	0.358507	0.0774577	0.604972	0.316265	0.333948	-0.084544	0.770302	-0.130341	-0.128141	-0.594507	0.543586	0.440711	0.408573	0.115683	0.620149	-0.2156	-0.217896	-0.815106	0.314633	-0.000441867	-0.0766681	-0.969547	0.117213	-0.170252	-0.173038	-0.359393	0.0371834	0.222692	0.184875	-0.217804	0.506889	0.353723	0.337598	-0.0904537	0.696797	-0.185807	-0.185583	-0.508924	0.204042	-0.153528	-0.153655	-0.396979	0.10852	-0.0380319
2920	0.350982	0.361862	0.117599	0.587963	0.35246	0.352059	0.0687674	0.598716	0.319421	0.335887	-0.0759745	0.767291	-0.126921	-0.122761	-0.585456	0.546341	0.439839	0.40503	0.112486	0.616756	-0.222569	-0.225424	-0.843344	0.306742	0.0155606	-0.0589646	-0.925931	0.13196	-0.170169	-0.171656	-0.363633	0.0438523	0.241024	0.198318	-0.209136	0.524228	0.352536	0.335184	-0.0975242	0.691473	-0.195086	-0.192552	-0.518391	0.201129	-0.144892	-0.143362	-0.385388	0.122347	-0.0458813
2960	0.344898	0.355493	0.107621	0.588224	0.341286	0.343723	0.0557049	0.588566	0.322222	0.338057	-0.0671718	0.761932	-0.123048	-0.117635	-0.574328	0.532113	0.437926	0.40021	0.109248	0.613328	-0.228327	-0.232918	-0.887546	0.301663	0.0329348	-0.0402142	-0.876649	0.156618	-0.170091	-0.170188	-0.371053	0.0449842	0.258804	0.21259	-0.193949	0.536653	0.35166	0.332632	-0.100045	0.689963	-0.202954	-0.198533	-0.522422	0.200328	-0.136863	-0.133317	-0.374281	0.133195	-0.0506693
3000	0.339129	0.349322	0.0972812	0.587668	0.328795	0.33353	0.0470981	0.57854	0.324639	0.340415	-0.0618036	0.756282	-0.118592	-0.112862	-0.563173	0.526362	0.435038	0.394251	0.102185	0.609411	-0.233003	-0.240235	-0.931428	0.298185	0.0517332	-0.02041	-0.820166	0.183236	-0.170046	-0.168663	-0.371365	0.0472798	0.275927	0.227774	-0.179454	0.550319	0.351042	0.329896	-0.100747	0.689572	-0.209426	-0.203519	-0.526004	0.200139	-0.129435	-0.123551	-0.367356	0.147687	-0.0524932
3040	0.333733	0.343431	0.0832123	0.586462	0.315418	0.321468	0.0367042	0.566968	0.326679	0.342868	-0.0536332	0.75808	-0.113422	-0.108502	-0.556674	0.522678	0.431243	0.387251	0.0952773	0.605574	-0.236725	-0.247266	-0.968022	0.294833	0.072008	0.000458013	-0.75812	0.21632	-0.170064	-0.167125	-0.375824	0.0479328	0.292287	0.243896	-0.165217	0.564726	0.350627	0.326963	-0.108075	0.682923	-0.214518	-0.207446	-0.527303	0.196263	-0.122602	-0.114079	-0.355673	0.157439	-0.0514508
3080	0.328767	0.337904	0.0690401	0.58751	0.301194	0.307559	0.0220084	0.551064	0.32835	0.345278	-0.0471058	0.750919	-0.107408	-0.104437	-0.557137	0.525655	0.426608	0.379369	0.0820316	0.60049	-0.239622	-0.253864	-1.00648	0.282911	0.0938118	0.0224088	-0.692024	0.253029	-0.170124	-0.165626	-0.380192	0.0526434	0.307778	0.260926	-0.144101	0.577472	0.350359	0.323888	-0.112615	0.679423	-0.218246	-0.210279	-0.525157	0.199595	-0.116343	-0.10491	-0.347231	0.161118	-0.0476394
3120	0.324289	0.332857	0.0546102	0.586788	0.286166	0.291948	0.00975323	0.535703	0.329658	0.34754	-0.0339571	0.748161	-0.100418	-0.100243	-0.568588	0.535461	0.421202	0.37099	0.0716516	0.593275	-0.241823	-0.25999	-1.03918	0.279747	0.117197	0.0453884	-0.622634	0.292171	-0.169521	-0.164154	-0.382746	0.0578094	0.322297	0.278308	-0.125594	0.595686	0.350183	0.32067	-0.112517	0.675541	-0.220626	-0.212035	-0.52452	0.201247	-0.108968	-0.0959059	-0.335911	0.159718	-0.0411567
3160	0.320356	0.328483	0.0435304	0.587652	0.270373	0.275384	-0.00269286	0.520831	0.33061	0.349253	-0.0227966	0.745811	-0.0923231	-0.0948093	-0.565613	0.540958	0.415091	0.362599	0.0571554	0.586419	-0.243456	-0.265684	-1.06694	0.269006	0.142216	0.0692404	-0.551186	0.332812	-0.168042	-0.162335	-0.387788	0.0618911	0.335736	0.295205	-0.110366	0.609628	0.350044	0.317386	-0.113115	0.673348	-0.221674	-0.212827	-0.523012	0.201959	-0.0994119	-0.0861087	-0.328589	0.166678	-0.0321001
3200	0.317027	0.324909	0.0333203	0.586122	0.253857	0.258231	-0.0122283	0.503974	0.331213	0.350106	-0.0113708	0.747707	-0.0829917	-0.0876306	-0.579057	0.55337	0.408344	0.354505	0.0390899	0.580789	-0.244649	-0.271078	-1.09368	0.270111	0.168921	0.0937071	-0.482487	0.372118	-0.165719	-0.159982	-0.393695	0.0667322	0.347991	0.311175	-0.0894291	0.618926	0.349887	0.3141	-0.110429	0.666075	-0.221405	-0.212707	-0.518378	0.200653	-0.087842	-0.0749875	-0.319696	0.176843	-0.0205673
3240	0.314404	0.322176	0.0273106	0.585668	0.236656	0.240568	-0.0278233	0.489131	0.331475	0.350091	-0.00301184	0.742113	-0.0722935	-0.0785149	-0.585016	0.557219	0.401027	0.346768	0.0308694	0.572519	-0.245532	-0.276259	-1.13117	0.260773	0.195796	0.11838	-0.421466	0.411432	-0.162586	-0.156985	-0.397108	0.070834	0.358957	0.325811	-0.0694071	0.628083	0.349658	0.310837	-0.106395	0.65684	-0.219835	-0.211777	-0.519632	0.203373	-0.0744249	-0.0624871	-0.309829	0.189851	-0.00665574
3280	0.312639	0.320296	0.0238194	0.587671	0.218814	0.222514	-0.0401893	0.471205	0.331403	0.349218	0.0016965	0.737246	-0.0600981	-0.0671527	-0.598939	0.577833	0.393207	0.339322	0.0131804	0.565243	-0.246232	-0.281234	-1.1346	0.249711	0.221234	0.142875	-0.361455	0.450726	-0.158673	-0.153185	-0.397976	0.0759926	0.368528	0.338876	-0.0515842	0.634578	0.349315	0.307631	-0.103205	0.653047	-0.216979	-0.210088	-0.515363	0.204739	-0.0593274	-0.0486219	-0.297148	0.19747	0.00953703
3320	0.311711	0.319258	0.0211953	0.590835	0.200369	0.204241	-0.050204	0.453091	0.331003	0.347501	0.00636257	0.729413	-0.0462747	-0.0533714	-0.600927	0.598871	0.384954	0.332056	-0.0034842	0.555635	-0.24688	-0.285975	-1.17519	0.24343	0.245297	0.166754	-0.305332	0.487098	-0.154013	-0.148607	-0.400961	0.0821859	0.376453	0.350183	-0.0387542	0.638376	0.348835	0.304517	-0.104426	0.644085	-0.212855	-0.20761	-0.508487	0.207828	-0.0427161	-0.0334276	-0.287429	0.212877	0.0279135
3360	0.311591	0.319046	0.0172829	0.593689	0.181362	0.1858	-0.0657971	0.426688	0.330283	0.344933	0.00897232	0.718492	-0.0297707	-0.037107	-0.605117	0.615606	0.37638	0.32486	-0.0160035	0.546954	-0.247602	-0.290437	-1.20441	0.22544	0.26805	0.189663	-0.249366	0.523168	-0.148638	-0.143254	-0.399609	0.0895796	0.382406	0.359561	-0.0265722	0.64128	0.34816	0.301526	-0.0995304	0.63547	-0.207477	-0.204319	-0.50035	0.211312	-0.0247579	-0.0170208	-0.269304	0.228473	0.048376
3400	0.312249	0.319629	0.0148506	0.596242	0.161835	0.167204	-0.0799585	0.405647	0.32925	0.341472	0.0134355	0.702394	-0.00927896	-0.0182137	-0.60068	0.636255	0.367628	0.317586	-0.0263995	0.538792	-0.248529	-0.294548	-1.18549	0.210411	0.289556	0.211367	-0.199572	0.558139	-0.142579	-0.137146	-0.392307	0.0950346	0.38653	0.366859	-0.0150384	0.64088	0.347229	0.298659	-0.0949278	0.629864	-0.200874	-0.200184	-0.493006	0.21325	-0.0056194	0.000448454	-0.247859	0.248012	0.0708271
3440	0.313653	0.320993	0.0142584	0.598456	0.141827	0.148541	-0.0918032	0.381711	0.327898	0.337143	0.0153756	0.68856	0.0148541	0.00329609	-0.602976	0.650419	0.358768	0.310108	-0.044833	0.53028	-0.249787	-0.298205	-1.21058	0.197619	0.309879	0.231694	-0.153217	0.591805	-0.13587	-0.130304	-0.388933	0.103992	0.388988	0.37196	-0.00365969	0.640029	0.345981	0.295943	-0.0916534	0.620095	-0.193325	-0.195178	-0.487008	0.215328	0.0145326	0.0188422	-0.217226	0.269151	0.0951652
3480	0.315774	0.323094	0.0165886	0.600208	0.12138	0.12989	-0.103806	0.36753	0.325239	0.331982	0.0166407	0.675135	0.042262	0.0272703	-0.603639	0.666901	0.349866	0.302337	-0.0549939	0.522818	-0.251026	-0.301272	-1.24684	0.19043	0.329083	0.250595	-0.138322	0.624515	-0.128542	-0.122751	-0.381169	0.115019	0.389945	0.374827	0.00905063	0.637193	0.344356	0.293409	-0.0860073	0.610667	-0.184995	-0.189254	-0.481396	0.21623	0.0355312	0.038023	-0.191955	0.290522	0.119238
3520	0.318582	0.325881	0.0179241	0.601332	0.100775	0.111242	-0.11087	0.350319	0.320733	0.325998	0.0171465	0.663539	0.0725783	0.0534949	-0.602322	0.674068	0.340989	0.294188	-0.0744932	0.514911	-0.250789	-0.303622	-1.26253	0.196295	0.347232	0.268119	-0.143171	0.65278	-0.120627	-0.114531	-0.37316	0.127022	0.389562	0.375431	0.0222537	0.628763	0.342292	0.291078	-0.08506	0.598111	-0.175969	-0.182401	-0.470632	0.217025	0.0572099	0.0578515	-0.17071	0.311262	0.141252
3560	0.322045	0.329297	0.0217382	0.601915	0.0810507	0.092598	-0.124793	0.322477	0.31449	0.319175	0.0167924	0.650881	0.105436	0.0816115	-0.589012	0.682394	0.332206	0.285582	-0.0979592	0.509478	-0.249149	-0.305128	-1.27535	0.189902	0.364389	0.284266	-0.153665	0.678338	-0.112158	-0.105698	-0.36613	0.140849	0.388003	0.373813	0.0293528	0.618211	0.339731	0.288972	-0.08328	0.584717	-0.16633	-0.174625	-0.464437	0.217781	0.0794018	0.0781767	-0.142223	0.331101	0.161135
3600	0.326133	0.333269	0.0251411	0.604394	0.0623276	0.0739943	-0.144572	0.303603	0.306623	0.311517	0.0149007	0.63993	0.14047	0.111099	-0.596573	0.673385	0.323583	0.276456	-0.123801	0.501814	-0.246313	-0.305776	-1.28989	0.180682	0.380618	0.299088	-0.166255	0.701035	-0.103165	-0.0962791	-0.362679	0.155508	0.385431	0.370328	0.0421026	0.605548	0.33661	0.287098	-0.0780688	0.57264	-0.15616	-0.165905	-0.453263	0.218522	0.10194	0.0987666	-0.120555	0.349487	0.178816
3640	0.330817	0.337711	0.0315377	0.604767	0.0446111	0.0558863	-0.161961	0.288508	0.297241	0.30295	0.0130694	0.631713	0.177312	0.141027	-0.612644	0.677601	0.315189	0.266812	-0.149109	0.498358	-0.242489	-0.305492	-1.31022	0.176793	0.395984	0.312563	-0.17838	0.721182	-0.0936603	-0.0862063	-0.357499	0.167206	0.38201	0.365782	0.0452209	0.592912	0.33287	0.285359	-0.0729401	0.560401	-0.145544	-0.156291	-0.441655	0.219	0.124246	0.119052	-0.097015	0.3665	0.194222
3680	0.336065	0.342553	0.0372532	0.606435	0.0279069	0.0386356	-0.175256	0.27569	0.286456	0.293354	0.0117142	0.626165	0.215596	0.170611	-0.603994	0.676124	0.30709	0.256726	-0.174055	0.49376	-0.237884	-0.3044	-1.32871	0.169024	0.41055	0.324827	-0.192651	0.73081	-0.0834187	-0.0753956	-0.348883	0.182277	0.377901	0.360551	0.0524751	0.577818	0.32845	0.283499	-0.0646188	0.553673	-0.134563	-0.145879	-0.430268	0.220066	0.145051	0.138576	-0.0748112	0.382502	0.207281
3720	0.341848	0.347773	0.043418	0.611645	0.0122207	0.0222938	-0.191131	0.26242	0.274379	0.282798	0.00553493	0.610935	0.254956	0.199566	-0.606741	0.681761	0.299353	0.246299	-0.205093	0.488382	-0.232704	-0.302603	-1.3428	0.1664	0.424329	0.335718	-0.205481	0.739759	-0.0724401	-0.063881	-0.339152	0.194307	0.373269	0.35499	0.0596106	0.564225	0.323289	0.281347	-0.0554292	0.543078	-0.123303	-0.134798	-0.418113	0.220268	0.164284	0.157169	-0.0533309	0.397306	0.217923
3760	0.348135	0.353377	0.0507177	0.611788	-0.00244171	0.00693336	-0.199218	0.242974	0.261121	0.271412	-0.00230263	0.604276	0.295026	0.22782	-0.592857	0.688423	0.292048	0.235634	-0.229465	0.483804	-0.227157	-0.300238	-1.35787	0.167482	0.436229	0.344996	-0.214775	0.745875	-0.0608087	-0.0517384	-0.330836	0.20361	0.368276	0.349273	0.0661061	0.549244	0.317327	0.278765	-0.0477951	0.526408	-0.111845	-0.123189	-0.404442	0.227797	0.18195	0.174715	-0.0359808	0.408863	0.226074
3800	0.354877	0.359375	0.0591483	0.61534	-0.0160747	-0.00736066	-0.210169	0.222767	0.246794	0.259331	-0.00868098	0.593745	0.335438	0.255402	-0.584345	0.68974	0.28524	0.224813	-0.250175	0.478408	-0.22145	-0.297487	-1.38491	0.175161	0.445697	0.352523	-0.224513	0.747378	-0.0486084	-0.0390336	-0.320378	0.215018	0.363086	0.343514	0.0734153	0.53555	0.310503	0.275662	-0.042203	0.51702	-0.100274	-0.111184	-0.389023	0.229163	0.198052	0.191044	-0.0177319	0.422033	0.231663
3840	0.361993	0.365768	0.0687856	0.61826	-0.0286725	-0.0205631	-0.219511	0.217631	0.231507	0.246755	-0.0199908	0.587999	0.375826	0.282334	-0.572151	0.683802	0.278998	0.213935	-0.273336	0.475136	-0.21579	-0.294502	-1.41052	0.181906	0.452618	0.358097	-0.238098	0.752992	-0.0359233	-0.0258662	-0.306959	0.233289	0.357861	0.337811	0.0749699	0.522611	0.30278	0.271927	-0.0400652	0.50731	-0.088672	-0.0989372	-0.374128	0.229293	0.212596	0.206024	-0.00895079	0.433234	0.234617
3880	0.369426	0.372548	0.0792562	0.621443	-0.0402295	-0.0326751	-0.232016	0.209018	0.215373	0.234011	-0.033452	0.577386	0.415824	0.308508	-0.566555	0.688378	0.273388	0.20306	-0.290364	0.467218	-0.210383	-0.29142	-1.39715	0.183996	0.456876	0.361509	-0.251369	0.753647	-0.0228374	-0.0123458	-0.295793	0.252233	0.352733	0.33224	0.0730653	0.509661	0.294364	0.267433	-0.0388821	0.496502	-0.077123	-0.0865974	-0.36289	0.233071	0.225584	0.219497	0.00464678	0.446048	0.234866
3920	0.377118	0.379701	0.0875034	0.62618	-0.0507398	-0.0436634	-0.241595	0.204085	0.198502	0.221232	-0.0500853	0.564976	0.454653	0.333849	-0.549864	0.705149	0.268094	0.192089	-0.29908	0.461553	-0.205437	-0.288367	-1.37891	0.192508	0.458355	0.362581	-0.264278	0.731923	-0.00943464	0.00143137	-0.282686	0.27081	0.347424	0.326851	0.0653502	0.499916	0.2854	0.262085	-0.039029	0.485067	-0.06571	-0.074327	-0.348631	0.237835	0.237023	0.23142	0.0151172	0.451537	0.232336
3960	0.385013	0.387202	0.0977048	0.633306	-0.0601979	-0.0535196	-0.252213	0.203546	0.181005	0.208487	-0.0689907	0.556138	0.491007	0.358391	-0.51845	0.726602	0.261364	0.180921	-0.323179	0.456895	-0.20116	-0.285441	-1.33224	0.206602	0.456941	0.361195	-0.27928	0.713331	0.00420085	0.0153382	-0.27127	0.28921	0.341834	0.321678	0.0610285	0.490606	0.27599	0.255801	-0.0407883	0.474805	-0.0545165	-0.0622696	-0.331042	0.24099	0.246916	0.241843	0.0255534	0.467305	0.226957
4000	0.393052	0.395014	0.10851	0.638398	-0.0685979	-0.0622616	-0.258481	0.204314	0.163255	0.195918	-0.0784431	0.55243	0.524598	0.382133	-0.488086	0.757859	0.253012	0.169587	-0.34148	0.452768	-0.197757	-0.2826	-1.29689	0.212693	0.452518	0.357255	-0.284259	0.701975	0.0179851	0.0292897	-0.259036	0.307429	0.335971	0.316747	0.0509736	0.490976	0.266238	0.248494	-0.0468155	0.462669	-0.0437236	-0.0505922	-0.320862	0.24239	0.255267	0.250807	0.0327165	0.475464	0.218656
4040	0.401179	0.403104	0.117674	0.645346	-0.0759341	-0.0699144	-0.265833	0.206607	0.147333	0.183729	-0.0937783	0.545912	0.555188	0.40502	-0.465763	0.779082	0.243084	0.158099	-0.359468	0.444562	-0.195412	-0.279747	-1.25816	0.219678	0.444971	0.350783	-0.292018	0.735387	0.031834	0.0432383	-0.243178	0.322401	0.329842	0.312049	0.0411931	0.485949	0.256248	0.240133	-0.0533505	0.446232	-0.0337472	-0.039458	-0.309808	0.241386	0.262081	0.258331	0.0372668	0.489852	0.20736
4080	0.409337	0.411384	0.12643	0.653417	-0.0825955	-0.076524	-0.275079	0.206106	0.133622	0.17205	-0.107834	0.538895	0.582536	0.426976	-0.454133	0.807489	0.231625	0.146353	-0.379855	0.432034	-0.193407	-0.27685	-1.22304	0.224608	0.434183	0.342002	-0.296236	0.768863	0.0456637	0.0571061	-0.227491	0.335719	0.323455	0.307492	0.0253916	0.485522	0.246122	0.230742	-0.0579464	0.431646	-0.0245822	-0.0289617	-0.296135	0.236085	0.267363	0.264431	0.0367517	0.499429	0.193601
4120	0.417468	0.419769	0.137008	0.658518	-0.0890734	-0.0822823	-0.280442	0.205884	0.122062	0.161095	-0.119464	0.53067	0.606404	0.447541	-0.441866	0.845262	0.218681	0.134155	-0.389326	0.420537	-0.1911	-0.273527	-1.21898	0.234203	0.42004	0.33128	-0.296671	0.822704	0.05939	0.0707201	-0.212767	0.351282	0.316818	0.302683	0.0284201	0.488931	0.235965	0.220547	-0.0675257	0.418751	-0.0161798	-0.0192125	-0.285067	0.237968	0.271116	0.269083	0.0380544	0.509041	0.179624
4160	0.425516	0.428015	0.150175	0.667788	-0.0953103	-0.0874481	-0.278208	0.200374	0.112595	0.151416	-0.130727	0.5223	0.626552	0.465846	-0.43591	0.878879	0.204299	0.121322	-0.406895	0.405471	-0.188175	-0.269208	-1.1797	0.239674	0.402427	0.318939	-0.304251	0.868345	0.0729289	0.0838031	-0.197892	0.36806	0.309937	0.297486	0.0176308	0.50484	0.22588	0.210422	-0.0827338	0.404698	-0.00849131	-0.0102681	-0.279414	0.231937	0.273388	0.272331	0.0352315	0.513659	0.165699
4200	0.433422	0.436004	0.155629	0.679559	-0.101246	-0.0920935	-0.282118	0.202706	0.105163	0.143186	-0.136639	0.514869	0.64274	0.481584	-0.4251	0.908101	0.188523	0.107706	-0.428016	0.388981	-0.184314	-0.263651	-1.13157	0.243875	0.381226	0.305525	-0.303911	0.912185	0.0861719	0.0962872	-0.187502	0.380839	0.30282	0.291891	0.0144592	0.506791	0.21597	0.200776	-0.0897532	0.391761	-0.00146802	-0.00209056	-0.271075	0.229625	0.274821	0.274266	0.0282946	0.523118	0.151881
4240	0.441131	0.443667	0.162279	0.691918	-0.106819	-0.0962714	-0.289642	0.205946	0.0997072	0.136433	-0.142468	0.508327	0.654729	0.494599	-0.410358	0.936615	0.1714	0.0932838	-0.439903	0.368914	-0.179201	-0.256509	-1.07743	0.244659	0.357435	0.291488	-0.30387	0.921655	0.0987929	0.108089	-0.173724	0.391862	0.295474	0.285923	-0.0111925	0.504359	0.206338	0.191679	-0.0968255	0.381942	0.00493881	0.00539508	-0.259358	0.233998	0.275601	0.274916	0.0189275	0.531582	0.138225
4280	0.448583	0.450949	0.172432	0.69786	-0.111969	-0.0999755	-0.296373	0.200637	0.096169	0.131156	-0.144097	0.50229	0.66228	0.504734	-0.383415	0.95927	0.152976	0.0780778	-0.452077	0.347471	-0.17252	-0.247326	-1.02763	0.248121	0.337119	0.277489	-0.302979	0.937913	0.110682	0.119191	-0.163048	0.404037	0.287907	0.27962	-0.029044	0.514305	0.197089	0.183125	-0.0991527	0.381413	0.0107779	0.0122659	-0.249208	0.23154	0.2757	0.27433	0.0144666	0.534802	0.124787
4320	0.455724	0.457809	0.18227	0.706076	-0.116636	-0.103176	-0.306386	0.186585	0.0944899	0.127342	-0.141848	0.495309	0.665153	0.511843	-0.364917	0.973715	0.133297	0.0621439	-0.467697	0.327346	-0.163955	-0.235783	-0.979559	0.251176	0.320947	0.264165	-0.295853	0.962622	0.121802	0.12958	-0.14672	0.416876	0.280127	0.273038	-0.0411439	0.521097	0.188325	0.175125	-0.103183	0.37485	0.016098	0.018612	-0.248088	0.233496	0.275091	0.27257	0.00934224	0.532462	0.111622
4360	0.462301	0.464205	0.191728	0.71072	-0.12076	-0.105852	-0.31138	0.175061	0.0946115	0.124958	-0.142253	0.48969	0.663108	0.515836	-0.3484	0.976655	0.112408	0.0455663	-0.47479	0.304133	-0.153189	-0.221685	-0.925587	0.25387	0.308596	0.251881	-0.283818	0.958686	0.132112	0.139216	-0.130985	0.428013	0.272139	0.266227	-0.0500304	0.52414	0.180149	0.167657	-0.115386	0.373673	0.0209478	0.0245307	-0.242196	0.239506	0.273743	0.269693	0.00109683	0.529266	0.0987857
4400	0.468105	0.470106	0.205142	0.716838	-0.124279	-0.107951	-0.312111	0.16811	0.0964753	0.124013	-0.144436	0.485405	0.655907	0.516613	-0.342483	0.9703	0.0903555	0.0285477	-0.478988	0.277623	-0.139905	-0.204914	-0.862933	0.253402	0.299745	0.241039	-0.274962	0.931567	0.141576	0.148069	-0.1189	0.434169	0.263952	0.259228	-0.0743452	0.538631	0.172666	0.160671	-0.117685	0.368391	0.0253761	0.0301261	-0.23585	0.244534	0.271631	0.265733	-0.0110116	0.529678	0.0863334
4440	0.473177	0.475484	0.212993	0.725212	-0.127133	-0.109342	-0.319932	0.165583	0.100023	0.124532	-0.137222	0.481351	0.64331	0.51395	-0.329732	0.962689	0.0671849	0.0113276	-0.485089	0.25462	-0.123787	-0.185483	-0.795871	0.256759	0.294073	0.23201	-0.265082	0.927143	0.150154	0.156087	-0.106224	0.43899	0.255574	0.252087	-0.0984598	0.544419	0.165975	0.154107	-0.131938	0.366013	0.0294316	0.0354913	-0.224579	0.247402	0.268724	0.26067	-0.0253203	0.534109	0.0743206
4480	0.47756	0.480312	0.219504	0.731502	-0.129262	-0.109992	-0.327089	0.168499	0.105196	0.126533	-0.130922	0.477941	0.625991	0.507738	-0.312525	0.946313	0.0430314	-0.00599084	-0.497033	0.229641	-0.10452	-0.163517	-0.739173	0.262826	0.291259	0.225005	-0.250357	0.905465	0.157807	0.163256	-0.0937147	0.443384	0.246973	0.244847	-0.122307	0.549504	0.160046	0.147906	-0.139069	0.372096	0.033163	0.0407443	-0.21281	0.258678	0.264995	0.254495	-0.036328	0.531001	0.0628026
4520	0.481298	0.48458	0.226725	0.738446	-0.130605	-0.109881	-0.327958	0.165239	0.111935	0.12999	-0.121899	0.472451	0.607271	0.497975	-0.295742	0.920951	0.019877	-0.0233007	-0.498358	0.204228	-0.0817849	-0.139264	-0.683637	0.277805	0.290982	0.22074	-0.236091	0.907637	0.164498	0.16957	-0.0857552	0.4507	0.23813	0.237533	-0.140947	0.554107	0.154792	0.142028	-0.149451	0.369427	0.0366191	0.0460324	-0.204538	0.274864	0.260416	0.247202	-0.047007	0.525157	0.0518348
4560	0.484432	0.488278	0.23092	0.7436	-0.131102	-0.108976	-0.332298	0.173005	0.11993	0.134883	-0.113365	0.466297	0.587506	0.484825	-0.283126	0.882856	-0.00151569	-0.0403436	-0.499445	0.186666	-0.0552672	-0.112998	-0.62191	0.288032	0.29292	0.219421	-0.220789	0.878578	0.170188	0.175019	-0.0753427	0.452652	0.229086	0.230153	-0.150009	0.566962	0.150128	0.136447	-0.165266	0.369823	0.0398485	0.0514155	-0.203925	0.291481	0.254959	0.238813	-0.0568907	0.519128	0.0414727
4600	0.487006	0.491402	0.238883	0.74349	-0.13067	-0.107157	-0.334789	0.172626	0.128501	0.141161	-0.109225	0.459799	0.566733	0.468799	-0.281434	0.844827	-0.0211952	-0.0567631	-0.495001	0.172014	-0.0246498	-0.0851079	-0.566098	0.311087	0.296751	0.220852	-0.204292	0.812213	0.174838	0.17956	-0.0636218	0.450058	0.219884	0.222692	-0.158594	0.572753	0.14597	0.131118	-0.183478	0.377396	0.0433222	0.0570138	-0.194392	0.306667	0.248595	0.229701	-0.0712175	0.51199	0.0317717
4640	0.489062	0.493962	0.242082	0.747843	-0.128832	-0.104144	-0.336054	0.179203	0.137556	0.148299	-0.100924	0.459071	0.544986	0.451385	-0.27703	0.801419	-0.03921	-0.072236	-0.498184	0.171695	0.00906322	-0.0560287	-0.500615	0.32964	0.302156	0.22547	-0.187267	0.741651	0.17841	0.18321	-0.0532543	0.445719	0.210565	0.215168	-0.165954	0.578251	0.142231	0.12607	-0.198018	0.380729	0.0475789	0.0630892	-0.186829	0.317609	0.241295	0.221073	-0.0828819	0.507206	0.0227871
4680	0.490643	0.495969	0.248127	0.749646	-0.125519	-0.0999828	-0.328976	0.175517	0.147031	0.156011	-0.0987261	0.465307	0.522302	0.432973	-0.26542	0.761904	-0.0556084	-0.0864601	-0.499715	0.174768	0.0426537	-0.0262893	-0.447424	0.356183	0.308811	0.233337	-0.168827	0.687092	0.180865	0.186003	-0.0452845	0.444502	0.201172	0.207624	-0.174493	0.58594	0.138827	0.121285	-0.215391	0.384885	0.0525944	0.0697205	-0.179577	0.3366	0.233032	0.213551	-0.0918312	0.507572	0.0145815
4720	0.491792	0.497404	0.252961	0.751563	-0.120877	-0.0948128	-0.321893	0.183639	0.15686	0.164236	-0.0930697	0.461994	0.498715	0.413503	-0.253767	0.717097	-0.070439	-0.09931	-0.496381	0.181352	0.0756963	0.00363583	-0.403856	0.400807	0.316397	0.244169	-0.158009	0.65499	0.182165	0.188024	-0.0406042	0.435805	0.191746	0.200097	-0.182887	0.584656	0.135672	0.116714	-0.231657	0.39334	0.0583425	0.076927	-0.171225	0.348789	0.225303	0.207326	-0.107601	0.505984	0.00741284
4760	0.492551	0.498229	0.256619	0.748872	-0.115047	-0.0887966	-0.308477	0.193508	0.16698	0.172945	-0.0826632	0.45759	0.474262	0.392963	-0.253522	0.675246	-0.0837502	-0.110732	-0.500533	0.18686	0.107906	0.0333184	-0.362572	0.430228	0.324284	0.257717	-0.143372	0.635722	0.182357	0.189357	-0.0349287	0.425066	0.182329	0.192625	-0.189299	0.585045	0.132682	0.112303	-0.246022	0.395402	0.0647971	0.0846481	-0.167875	0.364013	0.220066	0.20263	-0.118825	0.500586	0.00135054
4800	0.492964	0.498381	0.259074	0.746922	-0.108175	-0.0821073	-0.299362	0.184884	0.177325	0.182123	-0.0751437	0.463106	0.448976	0.371384	-0.251651	0.637651	-0.0955905	-0.120683	-0.505306	0.198495	0.138999	0.0623777	-0.33033	0.464334	0.331804	0.273708	-0.125269	0.631934	0.182194	0.190044	-0.0248462	0.418224	0.172962	0.185243	-0.194154	0.588401	0.129769	0.107978	-0.254945	0.404154	0.0719321	0.0928345	-0.16911	0.374405	0.217201	0.19966	-0.124305	0.499833	-0.00365655
4840	0.493072	0.497812	0.260781	0.746046	-0.100404	-0.0749033	-0.288992	0.183618	0.187832	0.191641	-0.0664017	0.461695	0.422895	0.349132	-0.251447	0.59968	-0.106008	-0.129155	-0.515671	0.209832	0.168688	0.0904143	-0.302934	0.505675	0.339231	0.291832	-0.105463	0.649695	0.181889	0.190176	-0.0177921	0.410898	0.163689	0.177987	-0.197235	0.58863	0.12685	0.103708	-0.264955	0.406567	0.0797214	0.101408	-0.16024	0.391671	0.216577	0.198543	-0.125089	0.495339	-0.00765964
4880	0.492912	0.496496	0.263752	0.743253	-0.0918768	-0.0673617	-0.280471	0.190814	0.198436	0.201352	-0.0558086	0.464537	0.396053	0.326767	-0.243668	0.569939	-0.115052	-0.13607	-0.50977	0.222068	0.196691	0.116999	-0.268726	0.564811	0.34687	0.311629	-0.0775276	0.694913	0.181473	0.189819	-0.0128976	0.404327	0.15455	0.170877	-0.201195	0.587147	0.123839	0.0994741	-0.273878	0.412042	0.0881389	0.110334	-0.153699	0.402198	0.218063	0.199367	-0.126314	0.493262	-0.0107099
4920	0.491789	0.494368	0.266147	0.737985	-0.0827382	-0.0596778	-0.262807	0.195852	0.209073	0.211173	-0.0498392	0.475175	0.368485	0.304511	-0.250481	0.561173	-0.12277	-0.141294	-0.513859	0.233488	0.222721	0.141789	-0.245163	0.612847	0.355024	0.332805	-0.0526931	0.74155	0.180981	0.189062	-0.0108916	0.394312	0.145587	0.163925	-0.195475	0.586348	0.120651	0.095223	-0.284162	0.417436	0.0971584	0.119559	-0.159054	0.419952	0.221527	0.202113	-0.130843	0.497497	-0.0128586
4960	0.489285	0.491391	0.266285	0.735409	-0.0731317	-0.0519681	-0.253849	0.201537	0.219677	0.221022	-0.0468062	0.476636	0.340228	0.282541	-0.265925	0.569447	-0.129211	-0.144825	-0.509376	0.247871	0.246494	0.164558	-0.214417	0.676246	0.363997	0.355303	-0.033805	0.829525	0.180445	0.187959	-0.00607717	0.388404	0.136843	0.157139	-0.205991	0.586922	0.1172	0.0908997	-0.29676	0.423747	0.106754	0.129056	-0.161872	0.435004	0.226837	0.206744	-0.131816	0.504252	-0.0141569
5000	0.485479	0.487508	0.265517	0.727488	-0.0632008	-0.0443238	-0.245583	0.210211	0.230185	0.230723	-0.0406479	0.491403	0.311316	0.261121	-0.266775	0.569754	-0.134423	-0.146675	-0.50517	0.26326	0.267726	0.1851	-0.191228	0.689427	0.374093	0.378939	-0.011863	0.931066	0.179898	0.186539	-0.000854454	0.380459	0.128359	0.150497	-0.221828	0.595878	0.113238	0.0864673	-0.301923	0.427709	0.116899	0.138807	-0.159832	0.443854	0.233862	0.213222	-0.134162	0.512807	-0.0146559
5040	0.480451	0.482621	0.268794	0.723073	-0.0530895	-0.0368458	-0.237371	0.210098	0.240532	0.240097	-0.0336754	0.500581	0.282008	0.240474	-0.275448	0.583218	-0.138455	-0.146799	-0.51859	0.27616	0.28613	0.203155	-0.195847	0.712053	0.385616	0.403521	0.0033117	1.0218	0.179374	0.184844	0.001258	0.374132	0.119948	0.143878	-0.236415	0.59459	0.108283	0.0818488	-0.30976	0.42983	0.127568	0.148752	-0.161991	0.463311	0.242471	0.221508	-0.126385	0.526569	-0.014407
5080	0.474278	0.476706	0.265026	0.716895	-0.0429413	-0.0296503	-0.231754	0.213979	0.25065	0.248997	-0.0364981	0.511034	0.253682	0.220778	-0.280909	0.604168	-0.14089	-0.145101	-0.521313	0.291462	0.301423	0.218805	-0.222287	0.737841	0.398869	0.428889	0.0104154	1.13607	0.178906	0.182975	0.000356703	0.367682	0.110446	0.13696	-0.256445	0.591549	0.102415	0.0770302	-0.31896	0.430069	0.138735	0.158832	-0.168878	0.480562	0.252531	0.231481	-0.114981	0.533653	-0.0134612
5120	0.46704	0.469709	0.256842	0.709443	-0.0329	-0.0229865	-0.227135	0.213983	0.259579	0.256857	-0.0367076	0.518234	0.226593	0.202148	-0.287646	0.629097	-0.141159	-0.141469	-0.521114	0.306766	0.313319	0.232444	-0.244643	0.771669	0.414156	0.454634	0.0214347	1.26324	0.178526	0.181213	-0.000331206	0.361391	0.0997529	0.129602	-0.274736	0.598503	0.0957543	0.0719428	-0.326351	0.42628	0.150373	0.168864	-0.164185	0.492487	0.263912	0.242867	-0.101122	0.546434	-0.0118698
5160	0.458816	0.461627	0.244969	0.698758	-0.0231955	-0.0169283	-0.226303	0.2206	0.26671	0.263038	-0.0485644	0.531193	0.200774	0.184583	-0.289369	0.651142	-0.139264	-0.13583	-0.526845	0.33094	0.321533	0.244081	-0.27387	0.788813	0.431781	0.480201	0.023838	1.38014	0.178268	0.179754	-0.00174387	0.357582	0.0879494	0.121659	-0.296018	0.603761	0.0884184	0.0665263	-0.334269	0.432502	0.162403	0.178665	-0.158896	0.50451	0.276482	0.255429	-0.0830872	0.557454	-0.00968399
5200	0.449686	0.452564	0.233869	0.687892	-0.0143104	-0.0114073	-0.228072	0.234	0.272203	0.267468	-0.0600186	0.53335	0.176256	0.168121	-0.295377	0.670775	-0.135211	-0.12814	-0.525826	0.352803	0.325921	0.253845	-0.300564	0.799513	0.452048	0.505043	0.0111249	1.4859	0.178166	0.178676	-0.00818906	0.361126	0.0751157	0.113048	-0.324077	0.609307	0.0805258	0.0608363	-0.341515	0.442717	0.173755	0.188093	-0.163157	0.513341	0.290109	0.268976	-0.0604094	0.567624	-0.00695496
5240	0.439728	0.442678	0.220705	0.677417	-0.00632906	-0.00634833	-0.232901	0.237366	0.276217	0.270208	-0.0648143	0.538548	0.15307	0.152808	-0.303461	0.695153	-0.129004	-0.118377	-0.527398	0.368453	0.328495	0.261645	-0.326429	0.792143	0.475252	0.528424	-0.0112869	1.55737	0.178251	0.178074	-0.0115128	0.363356	0.0613319	0.103738	-0.354483	0.626202	0.072195	0.0549405	-0.34903	0.453657	0.184002	0.197099	-0.17338	0.527175	0.304567	0.28333	-0.0458089	0.577859	-0.0037339
5280	0.429021	0.432126	0.210465	0.665595	0.000713085	-0.00176144	-0.235187	0.243651	0.278915	0.271383	-0.0767981	0.54545	0.13125	0.138651	-0.312725	0.710804	-0.120647	-0.106557	-0.523751	0.387102	0.329923	0.267083	-0.356914	0.790281	0.497562	0.549533	-0.0341537	1.60719	0.178557	0.177957	-0.0182492	0.361474	0.0466783	0.0936998	-0.392705	0.624391	0.0635445	0.0489096	-0.356792	0.449371	0.193122	0.20562	-0.169919	0.530943	0.319248	0.298323	-0.0260546	0.588757	-7.20171e-05
5320	0.417645	0.421021	0.198294	0.654364	0.00678065	0.00237398	-0.236699	0.250642	0.280456	0.271174	-0.0868112	0.545313	0.110826	0.1256	-0.320944	0.73241	-0.110146	-0.0927223	-0.51867	0.398728	0.330103	0.269807	-0.369615	0.760084	0.515601	0.567812	-0.0568447	1.64193	0.179108	0.178327	-0.0222416	0.360186	0.0312352	0.0829663	-0.434161	0.63528	0.0546927	0.042796	-0.360827	0.447947	0.201095	0.213636	-0.165893	0.540234	0.334013	0.313795	-0.00725863	0.604915	0.00362711
5360	0.405678	0.409482	0.186317	0.642026	0.0118382	0.00601052	-0.237213	0.262049	0.281001	0.269797	-0.0983182	0.550014	0.0918317	0.113617	-0.328666	0.750533	-0.0975064	-0.0769738	-0.511339	0.419597	0.328932	0.269517	-0.387747	0.749302	0.529333	0.582329	-0.0807422	1.68415	0.179853	0.179172	-0.0253208	0.368013	0.0150827	0.0716382	-0.47651	0.653445	0.045758	0.0366454	-0.367269	0.457901	0.2079	0.221067	-0.167777	0.546783	0.348799	0.329558	0.00567583	0.611218	0.00663913
5400	0.3932	0.397633	0.17274	0.630307	0.0158505	0.00903221	-0.243621	0.272474	0.28071	0.267433	-0.111704	0.551651	0.0742976	0.102672	-0.348634	0.762169	-0.0827318	-0.0595471	-0.505309	0.448032	0.326311	0.266282	-0.404467	0.72293	0.538726	0.592417	-0.103437	1.71117	0.18078	0.180462	-0.0328187	0.372414	-0.00169875	0.0597455	-0.518824	0.65881	0.0368589	0.0304883	-0.37267	0.461104	0.213515	0.227891	-0.166696	0.564315	0.363542	0.34548	0.0262391	0.617071	0.00907564
5440	0.380318	0.385571	0.159521	0.620807	0.0187819	0.0114232	-0.246651	0.281824	0.279744	0.264272	-0.128126	0.555687	0.0582561	0.0926781	-0.356379	0.77092	-0.0658275	-0.0405898	-0.497062	0.463995	0.322136	0.260286	-0.417911	0.689023	0.543744	0.59781	-0.122804	1.69147	0.181887	0.182166	-0.0366058	0.376879	-0.0190291	0.0473386	-0.560059	0.670464	0.0281138	0.0243409	-0.380948	0.458443	0.217921	0.234008	-0.175058	0.57054	0.378178	0.361444	0.0409481	0.623888	0.0110774
5480	0.367694	0.373418	0.140317	0.612297	0.0205972	0.0131897	-0.252442	0.293005	0.278264	0.260541	-0.147328	0.561364	0.0437391	0.0835327	-0.356234	0.777443	-0.0467984	-0.0202486	-0.484617	0.483121	0.316306	0.25173	-0.43012	0.65835	0.544355	0.598125	-0.141772	1.66348	0.183177	0.184263	-0.0436198	0.383969	-0.036828	0.0345927	-0.607858	0.692672	0.0196411	0.018209	-0.391408	0.469614	0.221096	0.239181	-0.173459	0.584493	0.392645	0.37734	0.0625531	0.62437	0.0127852
5520	0.355548	0.361279	0.127829	0.601788	0.021261	0.0143271	-0.260363	0.302376	0.276429	0.256464	-0.160694	0.569061	0.0307784	0.0750605	-0.36706	0.796858	-0.0256492	0.00111965	-0.46974	0.507385	0.30872	0.240888	-0.440262	0.624968	0.540525	0.593451	-0.160251	1.57342	0.184649	0.186736	-0.0540717	0.392861	-0.0550152	0.0218456	-0.643272	0.703342	0.0115593	0.0120914	-0.406482	0.463863	0.223019	0.2434	-0.185263	0.596084	0.406878	0.393038	0.0863583	0.636081	0.0143398
5560	0.343833	0.349212	0.11075	0.594459	0.0207379	0.0148087	-0.271528	0.307145	0.274401	0.252216	-0.174195	0.577025	0.019406	0.0670403	-0.371387	0.812126	-0.00238482	0.0229437	-0.451801	0.520126	0.299277	0.228527	-0.449586	0.595875	0.532219	0.583559	-0.178549	1.50528	0.186305	0.189532	-0.0558302	0.400754	-0.0735105	0.0103368	-0.688556	0.713462	0.00395931	0.00595536	-0.423753	0.47015	0.22367	0.246603	-0.189705	0.605085	0.420816	0.408403	0.122233	0.648617	0.0158819
5600	0.332504	0.337302	0.0993503	0.585186	0.0189924	0.0145157	-0.281992	0.314766	0.27234	0.247981	-0.188366	0.584074	0.00950822	0.0591525	-0.37635	0.825153	0.0229899	0.0445663	-0.45119	0.535605	0.287873	0.215731	-0.454392	0.574599	0.519404	0.568586	-0.195829	1.41343	0.188144	0.192503	-0.0590254	0.409711	-0.0921936	0.00113035	-0.733463	0.731527	-0.00344954	-0.000232949	-0.436299	0.473751	0.223027	0.248465	-0.188771	0.620713	0.434394	0.423221	0.144562	0.660577	0.0175524
5640	0.321517	0.325608	0.0824969	0.574068	0.0159892	0.0133132	-0.292751	0.322562	0.270365	0.2438	-0.197564	0.595578	-0.000370744	0.0510942	-0.385239	0.834732	0.0492369	0.0650436	-0.447568	0.577652	0.274409	0.203196	-0.457533	0.557547	0.502046	0.549159	-0.212987	1.34718	0.190167	0.195395	-0.062063	0.421869	-0.107924	-0.00519562	-0.759208	0.748999	-0.0107935	-0.00638874	-0.447017	0.473079	0.22107	0.248576	-0.194055	0.620637	0.447549	0.437281	0.170551	0.670462	0.0194919
5680	0.310824	0.314108	0.0672148	0.562892	0.0116929	0.0111104	-0.300125	0.329179	0.268101	0.239546	-0.212381	0.606273	-0.010504	0.042838	-0.390704	0.840914	0.07179	0.0836359	-0.431313	0.596483	0.258781	0.191294	-0.457856	0.557769	0.480111	0.525973	-0.229823	1.27753	0.192375	0.198161	-0.0638127	0.429226	-0.11893	-0.00854133	-0.775997	0.761517	-0.0180939	-0.0125447	-0.457624	0.47124	0.217777	0.246848	-0.201588	0.628713	0.460217	0.450492	0.199816	0.681904	0.0218413
5720	0.300381	0.302822	0.0509429	0.554727	0.00619298	0.0078284	-0.315302	0.334887	0.265302	0.235091	-0.21503	0.615649	-0.0207533	0.0343521	-0.396712	0.84418	0.0903673	0.100199	-0.425522	0.611486	0.240889	0.180243	-0.455473	0.558907	0.453565	0.499728	-0.245938	1.18866	0.194768	0.200725	-0.0696234	0.436454	-0.125444	-0.00909235	-0.786287	0.771603	-0.0253723	-0.0187829	-0.465679	0.465984	0.213129	0.243209	-0.207507	0.625952	0.472336	0.462688	0.213618	0.690666	0.0247412
5760	0.290143	0.291776	0.0401032	0.546804	-0.000305062	0.00344929	-0.332907	0.339651	0.261814	0.230314	-0.224911	0.626379	-0.0309804	0.0256324	-0.402081	0.84501	0.105135	0.114527	-0.424984	0.633012	0.220631	0.170158	-0.45079	0.576417	0.422519	0.471539	-0.259364	1.1154	0.197348	0.203097	-0.0754601	0.443473	-0.127699	-0.00716242	-0.810821	0.785345	-0.0326501	-0.0251788	-0.475703	0.454619	0.207039	0.237614	-0.210348	0.619227	0.483824	0.473665	0.238505	0.701057	0.0283326
5800	0.280063	0.280961	0.0239057	0.539049	-0.00773125	-0.0020524	-0.344835	0.343099	0.257485	0.225038	-0.239003	0.63533	-0.041047	0.016708	-0.405322	0.845149	0.116259	0.126528	-0.411797	0.651684	0.199815	0.161191	-0.446899	0.582926	0.389194	0.442411	-0.276118	1.06172	0.200113	0.205283	-0.0745032	0.446015	-0.125927	-0.0029096	-0.81387	0.798733	-0.0399488	-0.0318009	-0.483769	0.441545	0.199251	0.230028	-0.216997	0.608615	0.49354	0.483295	0.254471	0.713496	0.0327561
5840	0.270096	0.270381	0.0108681	0.534016	-0.0160168	-0.00870332	-0.362425	0.348877	0.252163	0.218987	-0.252156	0.644019	-0.0508147	0.00768403	-0.407183	0.842348	0.123906	0.136091	-0.407196	0.665665	0.181707	0.153418	-0.437692	0.594407	0.35472	0.412972	-0.282094	1.00564	0.203065	0.207286	-0.0789614	0.451184	-0.120362	0.00354556	-0.815427	0.812464	-0.0472897	-0.0387201	-0.493285	0.425951	0.189799	0.220427	-0.221558	0.596881	0.500957	0.491455	0.265996	0.724837	0.0381525
5880	0.260198	0.260043	-0.0062018	0.528499	-0.0250929	-0.0164442	-0.380764	0.357265	0.245696	0.211975	-0.262044	0.646935	-0.0601453	-0.00130603	-0.413403	0.839943	0.128242	0.142854	-0.397262	0.682376	0.166229	0.146943	-0.426241	0.614491	0.319567	0.383835	-0.292179	0.957351	0.206192	0.209129	-0.0776649	0.458661	-0.111234	0.0118783	-0.810653	0.822246	-0.0546944	-0.0460133	-0.497284	0.407138	0.178752	0.208788	-0.229273	0.578707	0.50625	0.498115	0.275232	0.734195	0.0446625
5920	0.250322	0.249943	-0.020684	0.520553	-0.0348908	-0.025257	-0.39952	0.35973	0.237932	0.203847	-0.273045	0.648147	-0.0689005	-0.0100945	-0.41538	0.835128	0.129432	0.146818	-0.39405	0.689967	0.153238	0.14183	-0.412653	0.636581	0.284206	0.355475	-0.290192	0.920832	0.209391	0.210846	-0.0807552	0.461512	-0.098777	0.0218487	-0.799912	0.83405	-0.0621844	-0.0537315	-0.498816	0.390733	0.166178	0.195118	-0.242331	0.556294	0.509595	0.503274	0.281886	0.742201	0.0522052
5960	0.240423	0.240114	-0.03087	0.51296	-0.0453417	-0.0351479	-0.420138	0.3572	0.228718	0.194421	-0.291154	0.651551	-0.076942	-0.0185089	-0.416404	0.825895	0.127644	0.148232	-0.395404	0.692436	0.142592	0.138078	-0.394956	0.655124	0.249108	0.328138	-0.288462	0.894012	0.212602	0.21248	-0.0795587	0.466571	-0.0832235	0.0332696	-0.783993	0.845168	-0.0697809	-0.0619144	-0.507182	0.372849	0.152142	0.179456	-0.249264	0.536304	0.511167	0.506938	0.288594	0.749485	0.0584293
6000	0.230536	0.230636	-0.0401107	0.505295	-0.0563768	-0.0460989	-0.444104	0.360526	0.217903	0.183504	-0.300846	0.654836	-0.0841316	-0.0263652	-0.420539	0.807274	0.123042	0.147216	-0.39867	0.698574	0.134146	0.135673	-0.373131	0.656537	0.214744	0.302229	-0.292523	0.869238	0.215778	0.214076	-0.0800503	0.471167	-0.0648058	0.0459085	-0.772121	0.849953	-0.0775056	-0.0705726	-0.512736	0.353814	0.136713	0.161814	-0.260345	0.513136	0.51114	0.509114	0.285853	0.755985	0.0628202
6040	0.221393	0.221547	-0.0485364	0.501206	-0.0679274	-0.0580355	-0.463869	0.359067	0.205333	0.170949	-0.306463	0.653861	-0.0903309	-0.0335395	-0.428936	0.783512	0.115794	0.1438	-0.408742	0.696744	0.12776	0.134445	-0.352419	0.674065	0.181584	0.277772	-0.29857	0.853225	0.218873	0.215669	-0.0773965	0.47611	-0.0437565	0.0600479	-0.763954	0.8596	-0.0853798	-0.0797139	-0.518586	0.325732	0.119959	0.142229	-0.281305	0.494167	0.509691	0.509832	0.281353	0.76217	0.0655716
6080	0.213111	0.212961	-0.0595784	0.495504	-0.0799246	-0.0705972	-0.488567	0.352036	0.190857	0.156608	-0.30732	0.650182	-0.0954017	-0.039988	-0.435411	0.758683	0.106066	0.138123	-0.411776	0.693277	0.123288	0.134116	-0.332867	0.692457	0.1501	0.254732	-0.304266	0.83572	0.221842	0.217264	-0.0740568	0.479654	-0.0203079	0.076269	-0.7597	0.866395	-0.093425	-0.0893892	-0.509889	0.300527	0.101947	0.121044	-0.294542	0.45629	0.506994	0.509275	0.267918	0.76718	0.0668772
6120	0.205606	0.205032	-0.0697537	0.490099	-0.0922997	-0.0832227	-0.509932	0.343593	0.174322	0.140373	-0.313183	0.639905	-0.0992057	-0.0457894	-0.439913	0.734795	0.0940229	0.130313	-0.421871	0.693694	0.120589	0.134583	-0.309709	0.707186	0.120761	0.233151	-0.308521	0.817292	0.224639	0.218861	-0.0708028	0.489118	0.00530728	0.0947026	-0.748321	0.86963	-0.101663	-0.0997534	-0.503037	0.271873	0.0827438	0.0991579	-0.304941	0.441645	0.503225	0.507706	0.263679	0.774573	0.0669307
6160	0.198798	0.197793	-0.0806831	0.485055	-0.104984	-0.0957677	-0.530313	0.33388	0.155576	0.12239	-0.31814	0.624912	-0.101658	-0.0510525	-0.441352	0.711699	0.0798317	0.120354	-0.432303	0.69077	0.119519	0.135803	-0.288056	0.714544	0.0940399	0.212865	-0.312616	0.806272	0.227216	0.220437	-0.0672379	0.493731	0.0328566	0.1153	-0.712707	0.872808	-0.110284	-0.110914	-0.491368	0.245846	0.0624178	0.0770323	-0.324559	0.428329	0.498558	0.505332	0.248691	0.777034	0.0659258
6200	0.192602	0.191225	-0.0845088	0.480922	-0.117908	-0.108149	-0.548754	0.322951	0.134826	0.102883	-0.323253	0.60874	-0.10384	-0.0558763	-0.442365	0.694034	0.0637003	0.108298	-0.445494	0.675545	0.119935	0.137753	-0.266242	0.712321	0.0704061	0.193833	-0.312639	0.793133	0.229529	0.221947	-0.0629304	0.500159	0.0622721	0.137886	-0.684982	0.87616	-0.119563	-0.122971	-0.501584	0.214198	0.0410362	0.0551647	-0.342032	0.403377	0.49317	0.502261	0.236707	0.7826	0.0640564
6240	0.186936	0.185281	-0.0881541	0.476381	-0.130964	-0.120219	-0.567768	0.311921	0.11314	0.082066	-0.335541	0.592953	-0.106225	-0.0603509	-0.444449	0.670816	0.0463599	0.0942437	-0.458391	0.654188	0.121695	0.1404	-0.244281	0.711977	0.0503308	0.17598	-0.310784	0.781031	0.231532	0.223323	-0.0595894	0.506022	0.0936892	0.162307	-0.647622	0.876846	-0.129615	-0.136023	-0.519151	0.18232	0.0186665	0.0338013	-0.356632	0.379639	0.487234	0.498638	0.221074	0.783569	0.0615161
6280	0.181719	0.179909	-0.0920925	0.471331	-0.143127	-0.131807	-0.579949	0.307147	0.0907193	0.0602112	-0.346596	0.567035	-0.10882	-0.0645871	-0.444501	0.654463	0.0280223	0.078253	-0.468351	0.639607	0.124655	0.143694	-0.222187	0.711509	0.0336126	0.159247	-0.312283	0.76861	0.233177	0.224526	-0.0573542	0.514617	0.126742	0.188419	-0.604738	0.884879	-0.140553	-0.150157	-0.520705	0.154251	-0.00462371	0.0130612	-0.369299	0.343945	0.480927	0.494562	0.209519	0.78647	0.0584986
6320	0.176866	0.175024	-0.0962689	0.465678	-0.154023	-0.142805	-0.591757	0.302596	0.0676959	0.0376545	-0.359985	0.535911	-0.111628	-0.0687845	-0.441547	0.631601	0.00868228	0.0603617	-0.477271	0.629809	0.128673	0.147585	-0.204867	0.716103	0.0175445	0.143611	-0.309184	0.758592	0.23442	0.225508	-0.0501095	0.522392	0.161037	0.216096	-0.562069	0.888901	-0.152492	-0.165471	-0.523418	0.122244	-0.028767	-0.00688752	-0.38275	0.321592	0.474596	0.490102	0.196253	0.793245	0.0551977
6360	0.172296	0.170527	-0.100306	0.460373	-0.163719	-0.153097	-0.600442	0.297418	0.0442018	0.014669	-0.37366	0.507905	-0.114654	-0.0731292	-0.440208	0.610124	-0.011665	0.0406759	-0.487275	0.611079	0.133627	0.152075	-0.196493	0.71387	0.00180593	0.128775	-0.307132	0.748526	0.235213	0.226232	-0.0512112	0.526116	0.196181	0.245169	-0.523053	0.898218	-0.165546	-0.182068	-0.529497	0.084751	-0.0521302	-0.0258504	-0.399351	0.306823	0.468728	0.485296	0.179962	0.79501	0.0518072
6400	0.167926	0.166339	-0.103807	0.450046	-0.172283	-0.162617	-0.607516	0.29166	0.0203691	-0.00851175	-0.383826	0.480277	-0.117905	-0.0777416	-0.438511	0.590177	-0.0330245	0.0191891	-0.494376	0.579704	0.139599	0.157183	-0.182478	0.709661	-0.0135794	0.114366	-0.302087	0.737398	0.235512	0.226667	-0.0529732	0.528051	0.231781	0.275441	-0.482653	0.901864	-0.179831	-0.200052	-0.53247	0.0535765	-0.0726408	-0.0435457	-0.412645	0.28252	0.463311	0.480153	0.166329	0.798617	0.0485207
6440	0.163673	0.162329	-0.105299	0.439142	-0.179779	-0.171343	-0.609762	0.284997	-0.00367015	-0.0316317	-0.399123	0.447772	-0.121384	-0.0827022	-0.435305	0.576135	-0.0554012	-0.00416926	-0.503552	0.563868	0.146511	0.162917	-0.167707	0.70096	-0.0285876	0.100294	-0.298691	0.7244	0.235239	0.226775	-0.0624128	0.532676	0.267443	0.306699	-0.432211	0.910347	-0.195459	-0.219522	-0.5422	0.0102928	-0.0903868	-0.0596474	-0.426662	0.265058	0.458309	0.474675	0.150219	0.804582	0.0455319
6480	0.159455	0.158364	-0.108833	0.432382	-0.186277	-0.179256	-0.609232	0.276164	-0.027784	-0.054382	-0.411269	0.417366	-0.125097	-0.0880295	-0.433431	0.554803	-0.0788001	-0.0294054	-0.519038	0.539624	0.154233	0.169255	-0.152135	0.689653	-0.0431947	0.0863602	-0.293719	0.708756	0.234241	0.226532	-0.0625537	0.53582	0.302774	0.338595	-0.391258	0.917458	-0.212546	-0.240524	-0.564397	-0.0246852	-0.105467	-0.0739749	-0.438352	0.265886	0.453685	0.468859	0.135705	0.808741	0.0430347
6520	0.15519	0.154363	-0.108359	0.424939	-0.191842	-0.186304	-0.612561	0.269673	-0.0518405	-0.0765149	-0.422807	0.395838	-0.129048	-0.0936844	-0.430782	0.522849	-0.103226	-0.056458	-0.538242	0.501199	0.162633	0.17614	-0.144733	0.687271	-0.0573769	0.0723281	-0.288254	0.693379	0.232618	0.225936	-0.0633428	0.535445	0.337382	0.370315	-0.360543	0.938415	-0.231206	-0.263073	-0.587556	-0.0606086	-0.117982	-0.0864062	-0.446123	0.253336	0.449405	0.462729	0.122047	0.813526	0.0412227
6560	0.150834	0.150249	-0.106278	0.418482	-0.196541	-0.192441	-0.616652	0.263368	-0.0757075	-0.0978239	-0.433403	0.37422	-0.133243	-0.0995594	-0.429953	0.511418	-0.128684	-0.0852675	-0.556383	0.469048	0.171581	0.183397	-0.130126	0.677366	-0.0711104	0.0579912	-0.284815	0.673118	0.230512	0.224994	-0.0684495	0.535686	0.370872	0.400602	-0.320167	0.953733	-0.251554	-0.287046	-0.601547	-0.0947828	-0.12803	-0.0968477	-0.449439	0.2473	0.445432	0.45642	0.104173	0.819574	0.0390337
6600	0.146556	0.146042	-0.106866	0.404962	-0.200441	-0.197555	-0.622891	0.25659	-0.099253	-0.118016	-0.442944	0.350741	-0.137687	-0.105427	-0.434713	0.501229	-0.15518	-0.115604	-0.575408	0.436807	0.180945	0.190787	-0.116556	0.668444	-0.0843711	0.0431915	-0.280115	0.645702	0.228061	0.223774	-0.0698971	0.534234	0.402851	0.428974	-0.271437	0.963719	-0.273703	-0.31167	-0.614358	-0.125825	-0.13571	-0.105336	-0.456379	0.238054	0.441732	0.450332	0.0872403	0.821493	0.0349879
6640	0.1424	0.141789	-0.103441	0.396202	-0.203608	-0.201668	-0.624421	0.247688	-0.122345	-0.13697	-0.452972	0.324394	-0.142383	-0.111138	-0.434541	0.482181	-0.182717	-0.147135	-0.601478	0.39972	0.190596	0.198124	-0.111885	0.659597	-0.0971354	0.0279528	-0.276295	0.613763	0.225408	0.222388	-0.0792485	0.533922	0.432927	0.455015	-0.232326	0.972048	-0.297768	-0.335942	-0.643409	-0.155555	-0.141122	-0.111972	-0.463011	0.231574	0.438267	0.444594	0.070121	0.824853	0.02915
6680	0.138381	0.137569	-0.0990558	0.38858	-0.206111	-0.204834	-0.623795	0.238558	-0.144852	-0.154757	-0.462263	0.295935	-0.147339	-0.116607	-0.432384	0.46937	-0.211302	-0.179657	-0.628206	0.362785	0.200401	0.205306	-0.112608	0.65769	-0.109379	0.0123919	-0.274324	0.575612	0.22269	0.220979	-0.0847947	0.534147	0.460705	0.478602	-0.222684	0.978075	-0.323864	-0.359474	-0.665875	-0.180143	-0.144366	-0.116945	-0.464622	0.222067	0.435004	0.439261	0.0599647	0.824496	0.0215904
6720	0.134512	0.133512	-0.0968017	0.376543	-0.208014	-0.207091	-0.629332	0.229062	-0.166641	-0.171474	-0.469553	0.269521	-0.152549	-0.121762	-0.429236	0.45545	-0.240938	-0.212985	-0.651772	0.327833	0.210231	0.21224	-0.109969	0.646708	-0.121079	-0.00334212	-0.272922	0.534629	0.220049	0.219706	-0.0895546	0.532537	0.485793	0.499709	-0.199571	0.981954	-0.351392	-0.382124	-0.68304	-0.207644	-0.14554	-0.120365	-0.470976	0.228185	0.431906	0.434483	0.0544213	0.820309	0.0123793
6760	0.13081	0.129637	-0.0947211	0.36407	-0.209386	-0.208437	-0.630878	0.222954	-0.187933	-0.187213	-0.476232	0.244209	-0.15738	-0.126539	-0.426267	0.439409	-0.271632	-0.246918	-0.681603	0.296908	0.219953	0.218806	-0.113472	0.632788	-0.13221	-0.0189676	-0.272756	0.492765	0.217625	0.21867	-0.100589	0.533268	0.507956	0.518282	-0.185414	0.985168	-0.377582	-0.403878	-0.705153	-0.225394	-0.144743	-0.122269	-0.481146	0.232071	0.428937	0.430402	0.0504894	0.819785	0.00158714
6800	0.127289	0.12599	-0.0942859	0.353601	-0.210224	-0.208861	-0.628176	0.215973	-0.208873	-0.202041	-0.482539	0.215876	-0.161503	-0.130861	-0.425861	0.418357	-0.303462	-0.281288	-0.711776	0.266307	0.229438	0.224913	-0.115584	0.630378	-0.142691	-0.0340427	-0.272939	0.442238	0.215557	0.21799	-0.0994844	0.532188	0.529194	0.534303	-0.167575	0.983948	-0.402142	-0.424734	-0.734027	-0.239191	-0.142076	-0.12275	-0.486431	0.232234	0.426062	0.42716	0.0497873	0.82028	-0.0107158
6840	0.123963	0.122585	-0.0899201	0.344735	-0.210215	-0.208318	-0.619127	0.214052	-0.229214	-0.216019	-0.49044	0.189737	-0.165017	-0.134668	-0.424148	0.399375	-0.336404	-0.315895	-0.743106	0.234274	0.238553	0.23042	-0.116507	0.622505	-0.152406	-0.0483322	-0.273579	0.400069	0.213986	0.217751	-0.109769	0.531542	0.550072	0.547815	-0.135708	0.984828	-0.42507	-0.444682	-0.755284	-0.243635	-0.137637	-0.121929	-0.495572	0.238003	0.423297	0.424832	0.0510967	0.820078	-0.0244593
6880	0.120849	0.119425	-0.0927592	0.336397	-0.209249	-0.206757	-0.617205	0.215298	-0.248708	-0.229214	-0.496006	0.159453	-0.168019	-0.137984	-0.426095	0.384003	-0.370309	-0.35053	-0.773562	0.199935	0.247169	0.235222	-0.116554	0.613633	-0.161351	-0.061768	-0.275217	0.36683	0.213052	0.218028	-0.112292	0.530095	0.570398	0.558898	-0.13163	0.991907	-0.446365	-0.463704	-0.785414	-0.238554	-0.131526	-0.120042	-0.510447	0.246907	0.421188	0.423402	0.0557144	0.819396	-0.039573
6920	0.11796	0.116524	-0.0926545	0.330245	-0.207258	-0.204137	-0.609	0.212661	-0.267108	-0.241671	-0.5005	0.138564	-0.170607	-0.140865	-0.426531	0.373152	-0.405025	-0.384925	-0.802376	0.167874	0.255155	0.239337	-0.125314	0.607611	-0.169523	-0.0740925	-0.276817	0.346171	0.212895	0.21887	-0.119167	0.530767	0.589983	0.567663	-0.122453	0.994063	-0.466025	-0.481776	-0.814613	-0.236874	-0.123913	-0.117323	-0.513961	0.249438	0.419854	0.422847	0.0628358	0.817723	-0.0559865
6960	0.115311	0.11387	-0.0872868	0.321691	-0.204171	-0.200399	-0.595835	0.212417	-0.284169	-0.253363	-0.503521	0.116625	-0.172878	-0.143387	-0.425127	0.370448	-0.440403	-0.41882	-0.834558	0.133952	0.262102	0.24286	-0.131153	0.598826	-0.176919	-0.0852458	-0.278314	0.305596	0.213654	0.220308	-0.120483	0.529036	0.608636	0.574264	-0.112488	0.992112	-0.484048	-0.498795	-0.847158	-0.230862	-0.116442	-0.113899	-0.518972	0.263536	0.419252	0.423141	0.0575605	0.81448	-0.0736296
7000	0.112918	0.11143	-0.0836904	0.310875	-0.199916	-0.19544	-0.589562	0.214062	-0.299643	-0.264242	-0.506764	0.099085	-0.17493	-0.145667	-0.423319	0.366074	-0.476291	-0.452009	-0.867951	0.0993397	0.267641	0.245892	-0.135505	0.592575	-0.183538	-0.09518	-0.280383	0.265726	0.215413	0.222363	-0.122806	0.527818	0.626167	0.579222	-0.103856	0.99139	-0.500433	-0.514591	-0.878729	-0.223542	-0.109788	-0.109888	-0.51802	0.273255	0.419335	0.424256	0.0668326	0.811113	-0.092432
7040	0.110796	0.109158	-0.0853905	0.298041	-0.194425	-0.189183	-0.578702	0.217239	-0.313282	-0.274278	-0.509562	0.0822359	-0.176862	-0.147866	-0.42256	0.366483	-0.512541	-0.484304	-0.897176	0.0635572	0.271816	0.248533	-0.138269	0.589361	-0.189376	-0.104133	-0.282823	0.22667	0.21792	0.225035	-0.127908	0.531334	0.642385	0.583452	-0.0845217	0.993234	-0.515177	-0.529107	-0.901268	-0.220932	-0.103976	-0.105447	-0.517194	0.276639	0.42006	0.426104	0.0739849	0.807234	-0.112323
7080	0.108959	0.106983	-0.0800074	0.291016	-0.187627	-0.181596	-0.563966	0.221243	-0.324841	-0.28328	-0.509601	0.0634619	-0.178769	-0.150283	-0.423873	0.367036	-0.549001	-0.515642	-0.923817	0.0383137	0.274671	0.250893	-0.140104	0.582916	-0.194431	-0.112487	-0.285443	0.191	0.221069	0.228257	-0.128637	0.541326	0.6571	0.587371	-0.0721501	1.00061	-0.528279	-0.542245	-0.923253	-0.213179	-0.0990333	-0.101011	-0.517985	0.275782	0.421381	0.428378	0.0820128	0.806113	-0.133233
7120	0.107333	0.104824	-0.0767344	0.285606	-0.17945	-0.172688	-0.556601	0.220552	-0.334072	-0.290976	-0.508432	0.0564877	-0.180752	-0.153107	-0.424572	0.358133	-0.585522	-0.546089	-0.94571	0.0046814	0.276253	0.253053	-0.137296	0.582226	-0.1987	-0.120474	-0.287571	0.153156	0.224795	0.23191	-0.127721	0.543451	0.670121	0.591318	-0.0746783	1.00744	-0.539737	-0.553632	-0.930872	-0.210661	-0.0949878	-0.0969919	-0.522885	0.276016	0.423254	0.430937	0.0883763	0.803069	-0.155091
7160	0.105636	0.102645	-0.0750929	0.280157	-0.169826	-0.162463	-0.547932	0.220513	-0.340729	-0.297292	-0.510655	0.0532538	-0.182906	-0.156282	-0.435828	0.346544	-0.621952	-0.575633	-0.972954	-0.0282766	0.276608	0.255061	-0.135068	0.597001	-0.202182	-0.128133	-0.28887	0.116055	0.229028	0.23588	-0.126166	0.559021	0.681258	0.595235	-0.0673754	1.00418	-0.549549	-0.56313	-0.938805	-0.20509	-0.0918662	-0.0935418	-0.522486	0.282445	0.425634	0.43372	0.0966769	0.801622	-0.177742
7200	0.103828	0.100433	-0.0758321	0.276061	-0.158683	-0.151017	-0.533873	0.22701	-0.344563	-0.30219	-0.516238	0.0428921	-0.18533	-0.159705	-0.436573	0.339597	-0.658142	-0.604262	-0.998221	-0.0669006	0.27578	0.256949	-0.137476	0.610545	-0.204873	-0.135045	-0.289966	0.0816635	0.233703	0.240034	-0.121327	0.568061	0.690321	0.59905	-0.0542054	1.00048	-0.557715	-0.570733	-0.956218	-0.199986	-0.0896954	-0.0907319	-0.526052	0.292426	0.428477	0.436574	0.0924767	0.796774	-0.20062
7240	0.101892	0.0981712	-0.0764908	0.276266	-0.145951	-0.138553	-0.516041	0.234936	-0.34533	-0.305674	-0.515589	0.0405544	-0.188121	-0.163249	-0.438982	0.334016	-0.693942	-0.631991	-1.02217	-0.0940988	0.273816	0.258626	-0.133865	0.627084	-0.206771	-0.141084	-0.290607	0.0480772	0.238751	0.244308	-0.124732	0.573989	0.697118	0.602722	-0.0421418	0.997496	-0.564231	-0.576492	-0.966176	-0.19756	-0.0885024	-0.0885779	-0.532727	0.291451	0.431737	0.439382	0.0952906	0.791535	-0.223557
7280	0.0998097	0.0958524	-0.0762086	0.267732	-0.131559	-0.125169	-0.500188	0.248815	-0.342945	-0.307878	-0.517823	0.052828	-0.191378	-0.16674	-0.454128	0.32147	-0.729201	-0.658832	-1.04806	-0.121759	0.270762	0.259861	-0.130125	0.647246	-0.207874	-0.146365	-0.289845	0.0185083	0.244106	0.248617	-0.126942	0.582966	0.70146	0.606169	-0.0426067	1.00035	-0.569098	-0.580459	-0.972524	-0.192887	-0.0883143	-0.0871241	-0.529433	0.283945	0.435369	0.442108	0.098149	0.788476	-0.246459
7320	0.0975627	0.0934614	-0.0769153	0.264276	-0.115438	-0.111027	-0.478918	0.260939	-0.339661	-0.308983	-0.517349	0.0559191	-0.193873	-0.169858	-0.459692	0.313183	-0.763768	-0.684641	-1.07383	-0.141692	0.266662	0.260359	-0.1301	0.667924	-0.208289	-0.150997	-0.288531	0.0119904	0.249699	0.252914	-0.127094	0.590379	0.703156	0.609319	-0.0269932	1.00015	-0.57239	-0.582675	-0.978629	-0.188843	-0.0891579	-0.0864624	-0.525205	0.284461	0.43933	0.444709	0.103621	0.785033	-0.269232
7360	0.0951331	0.0909914	-0.0780624	0.261589	-0.0984388	-0.0963338	-0.46499	0.272248	-0.33631	-0.309029	-0.520945	0.0524503	-0.194418	-0.172248	-0.463634	0.304395	-0.796514	-0.709183	-1.09317	-0.157497	0.261563	0.259926	-0.131032	0.681357	-0.20804	-0.154968	-0.289043	0.00588859	0.255464	0.257161	-0.123887	0.598402	0.702926	0.612089	-0.00912735	1.00935	-0.574256	-0.583196	-0.974088	-0.186843	-0.0910604	-0.0867735	-0.526361	0.280156	0.443573	0.447199	0.108101	0.780236	-0.291782
7400	0.0925031	0.0884235	-0.0844588	0.264731	-0.0819102	-0.0812053	-0.447661	0.283056	-0.332956	-0.308106	-0.526305	0.0569151	-0.193163	-0.173711	-0.471774	0.299252	-0.824551	-0.732464	-1.11899	-0.173392	0.255511	0.258362	-0.133776	0.69117	-0.207065	-0.158116	-0.334867	-0.00453855	0.261333	0.261332	-0.123285	0.60516	0.702013	0.614354	0.010256	1.00723	-0.574842	-0.582094	-0.976403	-0.183856	-0.0940487	-0.0882011	-0.531881	0.279867	0.447764	0.449597	0.125024	0.774378	-0.314016
7440	0.0896544	0.085721	-0.0827692	0.261223	-0.0658501	-0.0657762	-0.42572	0.297797	-0.329662	-0.306386	-0.531134	0.0682887	-0.190261	-0.17408	-0.481692	0.303352	-0.847999	-0.754431	-1.1413	-0.198826	0.24855	0.255506	-0.130658	0.69985	-0.205302	-0.160098	-0.422213	-0.0273409	0.267239	0.26544	-0.120042	0.611972	0.700461	0.615959	0.0235718	1.01546	-0.574294	-0.579446	-0.972621	-0.177141	-0.0981498	-0.0909314	-0.53532	0.285294	0.451564	0.451944	0.133904	0.768154	-0.335839
7480	0.0865692	0.0828415	-0.0946926	0.260044	-0.0502421	-0.0502537	-0.411432	0.313919	-0.326491	-0.304043	-0.539459	0.0701235	-0.185863	-0.173095	-0.493047	0.302584	-0.867188	-0.774817	-1.16314	-0.199044	0.240727	0.251249	-0.137807	0.71981	-0.20269	-0.160725	-0.501485	-0.0456616	0.273114	0.269476	-0.114768	0.615104	0.698305	0.616795	0.0509641	1.01637	-0.572759	-0.57536	-0.957596	-0.166571	-0.103391	-0.0950854	-0.53544	0.286703	0.45498	0.454296	0.136818	0.763591	-0.357157
7520	0.0832294	0.0797422	-0.101111	0.263047	-0.0350698	-0.034749	-0.399732	0.33165	-0.323506	-0.301227	-0.545614	0.0760994	-0.180121	-0.170541	-0.502342	0.300446	-0.882448	-0.79349	-1.18776	-0.199932	0.231964	0.245326	-0.15091	0.73004	-0.199165	-0.159867	-0.56044	-0.0562273	0.278891	0.273419	-0.108357	0.623831	0.69558	0.616672	0.0612363	1.01572	-0.570383	-0.570002	-0.941079	-0.160383	-0.109849	-0.100737	-0.535604	0.278246	0.45802	0.456694	0.140794	0.762121	-0.377877
7560	0.0796169	0.0763203	-0.111162	0.263292	-0.0203168	-0.0195264	-0.385148	0.347384	-0.320769	-0.298265	-0.551038	0.0826621	-0.173187	-0.166275	-0.512803	0.289731	-0.894109	-0.81023	-1.21013	-0.197522	0.221547	0.237646	-0.154848	0.733324	-0.194666	-0.15734	-0.590561	-0.0556318	0.284392	0.277117	-0.105395	0.632689	0.692321	0.615464	0.0613966	1.00677	-0.567313	-0.563648	-0.928454	-0.147206	-0.117695	-0.107885	-0.536979	0.275982	0.460694	0.458988	0.145472	0.765811	-0.397904
7600	0.0757138	0.0723301	-0.122062	0.260677	-0.00596668	-0.00478546	-0.373352	0.363015	-0.318344	-0.29589	-0.558498	0.0884728	-0.165212	-0.160309	-0.520538	0.281951	-0.902501	-0.824361	-1.22961	-0.190864	0.209439	0.228232	-0.163847	0.739775	-0.18913	-0.153174	-0.585158	-0.0520767	0.289055	0.280303	-0.101174	0.639601	0.688562	0.612955	0.0668602	0.997381	-0.563695	-0.55701	-0.916295	-0.143594	-0.126785	-0.116367	-0.546568	0.265182	0.463009	0.461104	0.147897	0.770615	-0.417145
7640	0.0715019	0.0676404	-0.131751	0.260539	0.00799684	0.00945678	-0.359508	0.376764	-0.316293	-0.294387	-0.566451	0.0994401	-0.156348	-0.15288	-0.533191	0.273813	-0.907955	-0.835337	-1.24689	-0.167932	0.195741	0.217139	-0.178076	0.747641	-0.182496	-0.147292	-0.533893	-0.0438449	0.292815	0.282898	-0.0963543	0.642576	0.684339	0.609182	0.0873403	0.984082	-0.559677	-0.550506	-0.896227	-0.133527	-0.136942	-0.126048	-0.552482	0.245615	0.464973	0.46314	0.156943	0.773533	-0.435505
7680	0.0667105	0.0621574	-0.143007	0.259818	0.0215902	0.0231705	-0.351641	0.392589	-0.314679	-0.293743	-0.578637	0.100991	-0.146748	-0.144261	-0.540661	0.271293	-0.9108	-0.843353	-1.26296	-0.173154	0.180558	0.204463	-0.189947	0.747894	-0.174701	-0.138716	-0.476946	-0.0321569	0.295677	0.284765	-0.0940011	0.64462	0.679685	0.604213	0.0806105	0.975879	-0.555403	-0.544285	-0.881888	-0.134922	-0.14799	-0.13678	-0.56365	0.231574	0.466596	0.465191	0.159387	0.778228	-0.452891
7720	0.0608455	0.0558222	-0.158742	0.256849	0.0348297	0.0363231	-0.342971	0.406751	-0.313565	-0.293938	-0.594056	0.108787	-0.136562	-0.134737	-0.550427	0.271217	-0.911367	-0.84852	-1.27967	-0.152996	0.163992	0.190301	-0.20939	0.743829	-0.165684	-0.127621	-0.416909	-0.0157022	0.297644	0.285901	-0.0932752	0.644791	0.674636	0.598138	0.0766669	0.965019	-0.551022	-0.5384	-0.865525	-0.139372	-0.159753	-0.148463	-0.583033	0.224503	0.467885	0.467389	0.158427	0.784775	-0.469209
7760	0.0539188	0.0485875	-0.166764	0.249322	0.0477319	0.0489063	-0.330992	0.41853	-0.313014	-0.294944	-0.602927	0.116916	-0.125943	-0.124555	-0.545365	0.271059	-0.909984	-0.850959	-1.28876	-0.151212	0.146146	0.174786	-0.224983	0.73638	-0.155381	-0.114836	-0.357417	0.00509703	0.298722	0.286343	-0.0922555	0.644823	0.669227	0.591054	0.0702415	0.963233	-0.546678	-0.5329	-0.854466	-0.15756	-0.172054	-0.160936	-0.595239	0.207388	0.468848	0.469801	0.158914	0.796811	-0.484343
7800	0.0459563	0.0404173	-0.176761	0.245734	0.060313	0.0608924	-0.318808	0.431808	-0.313089	-0.296739	-0.61754	0.118465	-0.115042	-0.11389	-0.54717	0.265951	-0.906984	-0.85079	-1.29832	-0.144262	0.127125	0.158057	-0.244401	0.734038	-0.143815	-0.100856	-0.297661	0.0277333	0.298914	0.286109	-0.0910246	0.639811	0.663493	0.583089	0.0602807	0.966212	-0.54252	-0.527828	-0.838027	-0.149865	-0.184716	-0.173951	-0.595557	0.186509	0.469495	0.472515	0.157058	0.802873	-0.49542
7840	0.0369834	0.0312945	-0.189612	0.237143	0.0725894	0.0722196	-0.314935	0.44162	-0.313802	-0.299296	-0.633115	0.124313	-0.104012	-0.102929	-0.548578	0.268113	-0.902695	-0.848039	-1.30953	-0.149403	0.107031	0.140205	-0.263683	0.727307	-0.131832	-0.0860216	-0.242116	0.0504248	0.298225	0.285224	-0.0894344	0.634448	0.657467	0.574394	0.0531534	0.968617	-0.538693	-0.523242	-0.826299	-0.152709	-0.197564	-0.187142	-0.611764	0.184375	0.469833	0.475616	0.144922	0.813744	-0.500773
7880	0.027026	0.0212199	-0.200489	0.234358	0.0845561	0.082857	-0.306442	0.457007	-0.315007	-0.302589	-0.651927	0.131417	-0.0926683	-0.091905	-0.551899	0.271087	-0.897448	-0.842866	-1.31702	-0.151873	0.0859663	0.121359	-0.279803	0.721766	-0.119711	-0.0709925	-0.239381	0.0691792	0.296659	0.283706	-0.0884061	0.624325	0.651186	0.565124	0.0411513	0.960237	-0.535559	-0.519207	-0.816838	-0.152661	-0.210421	-0.200277	-0.624947	0.166725	0.469871	0.479168	0.125205	0.82616	-0.500836
7920	0.0161095	0.0102204	-0.21608	0.225559	0.0956319	0.0927645	-0.300024	0.469413	-0.316696	-0.306573	-0.66972	0.137532	-0.0805818	-0.0809413	-0.560916	0.286325	-0.891539	-0.83554	-1.32153	-0.127482	0.0640354	0.101692	-0.299075	0.708397	-0.107503	-0.056429	-0.237001	0.0891634	0.294221	0.281568	-0.0849197	0.616996	0.644523	0.555435	0.0250941	0.950311	-0.533483	-0.515763	-0.810728	-0.142034	-0.22311	-0.213094	-0.638695	0.155084	0.470047	0.483217	0.114315	0.840742	-0.496038
7960	0.00425979	-0.00167935	-0.230611	0.217785	0.10557	0.101877	-0.291505	0.47522	-0.31888	-0.311141	-0.686453	0.136243	-0.0678126	-0.0699683	-0.56179	0.297896	-0.884863	-0.826349	-1.32578	-0.10621	0.0413411	0.0813373	-0.316878	0.692724	-0.0952614	-0.0424375	-0.234783	0.112142	0.290915	0.278835	-0.0807024	0.607155	0.636558	0.545502	0.0127224	0.941584	-0.532432	-0.512959	-0.80754	-0.135189	-0.235455	-0.225419	-0.651608	0.149409	0.472204	0.487861	0.109432	0.862477	-0.486813
8000	-0.00849759	-0.0144579	-0.243432	0.205975	0.114398	0.11016	-0.282978	0.484371	-0.32157	-0.316222	-0.702565	0.135671	-0.0544278	-0.0588512	-0.566373	0.314516	-0.877398	-0.815639	-1.3305	-0.0824624	0.0179866	0.0605729	-0.336816	0.675832	-0.0830399	-0.0290181	-0.232718	0.134994	0.286745	0.275533	-0.0769102	0.594433	0.627183	0.535318	0.000377083	0.932611	-0.532372	-0.510824	-0.807492	-0.143274	-0.24728	-0.237105	-0.666166	0.149832	0.47639	0.493241	0.106548	0.879744	-0.47359
8040	-0.022137	-0.0280077	-0.256253	0.195779	0.122144	0.117553	-0.282459	0.487914	-0.324776	-0.321709	-0.717945	0.133272	-0.0404947	-0.0474752	-0.576372	0.329311	-0.869197	-0.803651	-1.33236	-0.0550214	-0.00592499	0.0396216	-0.352565	0.658955	-0.0708911	-0.0164222	-0.231232	0.156596	0.281716	0.271746	-0.0678236	0.583212	0.616448	0.524777	-0.0253202	0.925238	-0.533268	-0.509377	-0.80382	-0.137946	-0.258408	-0.247868	-0.674296	0.147545	0.482419	0.499578	0.111129	0.893684	-0.456803
8080	-0.0366327	-0.0421237	-0.268829	0.177146	0.128835	0.123971	-0.269577	0.493012	-0.328509	-0.327323	-0.73137	0.128889	-0.0260803	-0.0352585	-0.577659	0.355748	-0.860311	-0.790796	-1.33383	-0.037217	-0.0302898	0.0185887	-0.364394	0.643812	-0.0588679	-0.0048271	-0.231391	0.176873	0.275832	0.267646	-0.0663889	0.576124	0.604405	0.513756	-0.0476021	0.922344	-0.535083	-0.50882	-0.81007	-0.1267	-0.268663	-0.257226	-0.679586	0.148457	0.490103	0.506807	0.110694	0.913635	-0.436882
8120	-0.051959	-0.0566453	-0.281445	0.159091	0.134498	0.129408	-0.261094	0.503103	-0.332779	-0.332917	-0.746885	0.132067	-0.0112517	-0.0220393	-0.576683	0.381347	-0.850794	-0.77725	-1.3344	-0.016064	-0.0542938	-0.00246958	-0.381291	0.627366	-0.0470232	0.00584972	-0.231655	0.198895	0.269255	0.263349	-0.0579694	0.569708	0.591108	0.502128	-0.0851032	0.919048	-0.537784	-0.509359	-0.818465	-0.115955	-0.27755	-0.265074	-0.681687	0.149976	0.499254	0.514763	0.0983345	0.932163	-0.414258
8160	-0.0680904	-0.071544	-0.292506	0.141848	0.139161	0.1339	-0.25185	0.504405	-0.337598	-0.338532	-0.764174	0.128664	0.00392399	-0.00790331	-0.567048	0.399792	-0.840698	-0.763042	-1.33294	0.0105675	-0.0772301	-0.0235188	-0.397039	0.612317	-0.0354101	0.0158511	-0.2321	0.223683	0.262689	0.25901	-0.0540164	0.561751	0.576607	0.489763	-0.117625	0.915499	-0.541335	-0.510962	-0.823314	-0.101984	-0.284542	-0.271389	-0.684596	0.150664	0.509688	0.523369	0.0914064	0.946311	-0.389365
8200	-0.0850011	-0.0867771	-0.305069	0.130625	0.142852	0.137511	-0.241755	0.503107	-0.342974	-0.344226	-0.777094	0.11832	0.0193796	0.00706911	-0.557481	0.421201	-0.830075	-0.748234	-1.33262	0.0345966	-0.099032	-0.0444478	-0.41075	0.591836	-0.0240815	0.0246929	-0.232463	0.252821	0.256292	0.254727	-0.0427721	0.549148	0.560955	0.476513	-0.150801	0.908955	-0.545702	-0.513572	-0.84083	-0.0822487	-0.28963	-0.276223	-0.696104	0.151292	0.521215	0.532436	0.0928931	0.957422	-0.362632
8240	-0.102282	-0.102267	-0.321505	0.115506	0.145599	0.140273	-0.232456	0.504921	-0.34892	-0.350057	-0.785501	0.107171	0.035048	0.0228055	-0.551904	0.443559	-0.818979	-0.732936	-1.33129	0.0627697	-0.119633	-0.0650516	-0.425498	0.563371	-0.0130904	0.0321852	-0.23248	0.281669	0.250151	0.250543	-0.0311547	0.531979	0.544203	0.462215	-0.170264	0.899484	-0.550848	-0.51713	-0.854229	-0.0772552	-0.292807	-0.279584	-0.711215	0.161265	0.53365	0.54189	0.098444	0.97515	-0.334491
8280	-0.119419	-0.117958	-0.331088	0.0971559	0.147428	0.142234	-0.227974	0.503702	-0.355446	-0.35608	-0.797853	0.095465	0.0508621	0.0391245	-0.550492	0.466407	-0.80746	-0.717254	-1.32794	0.0992585	-0.138966	-0.085165	-0.440384	0.545508	-0.00248962	0.0381346	-0.232458	0.316055	0.244352	0.246531	-0.0272767	0.514091	0.526403	0.446717	-0.194164	0.891733	-0.55674	-0.521579	-0.864137	-0.0746617	-0.294068	-0.281475	-0.718894	0.184417	0.546806	0.551586	0.101096	0.982919	-0.305375
8320	-0.136341	-0.133817	-0.337584	0.0848936	0.148367	0.143497	-0.223078	0.503826	-0.362562	-0.362346	-0.813097	0.0863371	0.0667547	0.0558746	-0.54631	0.481465	-0.795573	-0.70148	-1.32331	0.125193	-0.156965	-0.104571	-0.453022	0.52569	0.00657749	0.0423139	-0.233821	0.34887	0.238982	0.242745	-0.0177378	0.497729	0.507609	0.429848	-0.226916	0.876988	-0.563341	-0.526856	-0.878923	-0.0711697	-0.293405	-0.281849	-0.738155	0.190096	0.560495	0.561424	0.10193	0.993859	-0.275714
8360	-0.15298	-0.149768	-0.350162	0.0691277	0.148444	0.144119	-0.215767	0.500104	-0.370279	-0.368912	-0.824518	0.0824221	0.0826588	0.0729693	-0.543313	0.500668	-0.783369	-0.685852	-1.31714	0.155	-0.173564	-0.12306	-0.465328	0.50915	0.0104439	0.0443179	-0.234368	0.378997	0.234129	0.239248	-0.00624125	0.480611	0.48787	0.41146	-0.257493	0.865391	-0.570617	-0.532905	-0.894586	-0.0547237	-0.290814	-0.280681	-0.749788	0.202991	0.57453	0.571368	0.10463	1.0071	-0.24594
8400	-0.169265	-0.165707	-0.363603	0.0502777	0.147687	0.14417	-0.210658	0.492993	-0.378776	-0.375842	-0.838041	0.0807906	0.0985073	0.090358	-0.537365	0.521621	-0.770901	-0.670544	-1.31292	0.18368	-0.188695	-0.140396	-0.477944	0.494175	0.00929322	0.0437159	-0.235047	0.401991	0.229878	0.236089	0.000635573	0.462438	0.46724	0.39146	-0.271102	0.84605	-0.578533	-0.539695	-0.910079	-0.0428638	-0.286288	-0.277854	-0.764922	0.234602	0.588725	0.581382	0.10827	1.01826	-0.216541
8440	-0.185126	-0.181568	-0.378029	0.0348042	0.14625	0.143719	-0.204802	0.489767	-0.38818	-0.383229	-0.855726	0.0761496	0.11472	0.10804	-0.522188	0.548846	-0.758222	-0.655851	-1.30424	0.210211	-0.202292	-0.156304	-0.484932	0.479864	0.00366509	0.0403079	-0.234061	0.41955	0.226317	0.233317	0.0179247	0.451708	0.44577	0.369843	-0.278164	0.827525	-0.587038	-0.547216	-0.924479	-0.0360444	-0.27982	-0.273263	-0.77389	0.255496	0.602874	0.59141	0.116024	1.04414	-0.187974
8480	-0.200494	-0.197322	-0.392898	0.0208054	0.144795	0.142766	-0.202869	0.486851	-0.398348	-0.391113	-0.865911	0.0696692	0.132406	0.126096	-0.493989	0.558214	-0.745386	-0.64203	-1.29664	0.231964	-0.214289	-0.170457	-0.496082	0.466823	-0.00590094	0.0338356	-0.232237	0.440139	0.223533	0.230979	0.0197709	0.437503	0.42351	0.346711	-0.314387	0.800916	-0.596009	-0.55545	-0.937339	-0.0468499	-0.271405	-0.266832	-0.778287	0.270875	0.616174	0.601395	0.124014	1.05721	-0.160369
8520	-0.2153	-0.212765	-0.407293	0.0053187	0.143421	0.141373	-0.20535	0.482666	-0.409134	-0.399499	-0.879341	0.0638342	0.151521	0.144604	-0.469593	0.572859	-0.733196	-0.629314	-1.28791	0.253496	-0.224618	-0.18259	-0.504639	0.445877	-0.0188653	0.0241831	-0.230066	0.461086	0.221611	0.22917	0.0239702	0.425828	0.400348	0.322395	-0.34212	0.781521	-0.6054	-0.564384	-0.947341	-0.0359738	-0.261036	-0.258371	-0.779353	0.29917	0.62839	0.611306	0.135697	1.06691	-0.133831
8560	-0.229473	-0.22753	-0.422998	-0.00851299	0.142137	0.139792	-0.195144	0.472026	-0.420393	-0.408348	-0.892394	0.0647857	0.17197	0.164026	-0.460921	0.593787	-0.722273	-0.618014	-1.27722	0.270049	-0.233214	-0.192533	-0.515709	0.434146	-0.0346885	0.0114639	-0.228489	0.459452	0.220639	0.228008	0.0280628	0.414508	0.37626	0.297125	-0.373801	0.755812	-0.615175	-0.573992	-0.957157	-0.0370845	-0.248708	-0.247452	-0.774062	0.326736	0.63968	0.621051	0.151318	1.07424	-0.108471
8600	-0.242944	-0.241298	-0.435142	-0.0182418	0.140953	0.138109	-0.19015	0.463561	-0.431979	-0.41753	-0.901915	0.0619762	0.193653	0.184632	-0.451605	0.614493	-0.712642	-0.608521	-1.26679	0.298618	-0.240009	-0.20016	-0.522237	0.418441	-0.0528308	-0.00390692	-0.225635	0.443936	0.220703	0.227575	0.0360504	0.404363	0.351356	0.271085	-0.40489	0.73239	-0.625299	-0.583855	-0.964039	-0.0314094	-0.234413	-0.233933	-0.764227	0.349633	0.650199	0.630718	0.172183	1.089	-0.084395
8640	-0.255643	-0.254018	-0.445648	-0.0280479	0.139881	0.136384	-0.204412	0.455235	-0.443748	-0.426935	-0.910567	0.0539132	0.216474	0.20632	-0.440674	0.645746	-0.704328	-0.601023	-1.25735	0.300721	-0.244937	-0.205345	-0.527682	0.409381	-0.0727528	-0.0221365	-0.232022	0.419769	0.221891	0.227891	0.0357484	0.399735	0.325744	0.244426	-0.434491	0.706076	-0.635738	-0.593825	-0.971616	-0.0242269	-0.218147	-0.217807	-0.740718	0.370414	0.660106	0.640458	0.182168	1.10179	-0.0617126
8680	-0.267501	-0.26554	-0.458326	-0.0377157	0.138931	0.134685	-0.203465	0.452088	-0.455554	-0.436469	-0.921682	0.0415589	0.240336	0.228972	-0.427885	0.662023	-0.697354	-0.595595	-1.25006	0.310852	-0.247785	-0.208011	-0.533385	0.41434	-0.0939149	-0.0427156	-0.252747	0.399734	0.224183	0.228945	0.042253	0.391784	0.299535	0.217321	-0.462336	0.680425	-0.646455	-0.603834	-0.979912	-0.0295938	-0.199896	-0.199217	-0.732979	0.39197	0.669556	0.650445	0.209472	1.10531	-0.0405317
8720	-0.278447	-0.275756	-0.471233	-0.0493457	0.138111	0.133055	-0.19248	0.442737	-0.467252	-0.446047	-0.930977	0.0269067	0.265141	0.25242	-0.413212	0.675485	-0.691745	-0.592326	-1.24648	0.30872	-0.247868	-0.208125	-0.534034	0.42376	-0.115778	-0.0648823	-0.292213	0.353658	0.227209	0.230725	0.0500827	0.392713	0.272838	0.189927	-0.487912	0.654465	-0.657416	-0.613837	-0.988371	-0.0305055	-0.179519	-0.178337	-0.72552	0.413173	0.678707	0.660788	0.230777	1.10522	-0.0209604
8760	-0.288409	-0.284621	-0.490448	-0.0613329	0.137434	0.131544	-0.195444	0.436393	-0.478696	-0.455559	-0.937961	0.0131662	0.290791	0.276419	-0.398713	0.705253	-0.687526	-0.591278	-1.24113	0.306534	-0.245136	-0.20565	-0.533387	0.435022	-0.137801	-0.0875857	-0.351055	0.30005	0.230886	0.233188	0.0493291	0.394414	0.245761	0.16241	-0.512682	0.62849	-0.668586	-0.623784	-0.991546	-0.033266	-0.157067	-0.155438	-0.714307	0.435037	0.687714	0.671581	0.253699	1.10683	-0.00310694
8800	-0.296933	-0.292115	-0.506698	-0.0651704	0.13691	0.130278	-0.188924	0.430235	-0.489741	-0.464903	-0.942114	0.00498557	0.31719	0.300735	-0.380978	0.727303	-0.68472	-0.592313	-1.23924	0.297233	-0.239618	-0.200581	-0.531401	0.454264	-0.159446	-0.110218	-0.408425	0.253422	0.235168	0.236304	0.0497909	0.398971	0.218414	0.134951	-0.53445	0.610034	-0.67993	-0.633609	-0.99809	-0.0403121	-0.132679	-0.130781	-0.695305	0.455747	0.696736	0.682843	0.273116	1.10783	0.0129204
8840	-0.303756	-0.298201	-0.516169	-0.0680026	0.136547	0.12937	-0.189949	0.425817	-0.500243	-0.47401	-0.939409	-0.00562046	0.34424	0.325185	-0.359861	0.758773	-0.683352	-0.595295	-1.2383	0.2806	-0.231345	-0.192921	-0.52955	0.458973	-0.179659	-0.132135	-0.465048	0.227183	0.240008	0.240023	0.0565459	0.412359	0.190907	0.107699	-0.556008	0.591316	-0.691413	-0.643261	-1.00159	-0.0463534	-0.106495	-0.10464	-0.667831	0.471246	0.705927	0.694542	0.30099	1.11167	0.0270136
8880	-0.308916	-0.302842	-0.526407	-0.0695961	0.136358	0.128883	-0.195984	0.42704	-0.510056	-0.482805	-0.940899	-0.0201231	0.371843	0.34955	-0.345256	0.786955	-0.683446	-0.600136	-1.23414	0.267634	-0.220346	-0.182701	-0.527129	0.483568	-0.197589	-0.152936	-0.519853	0.17959	0.24536	0.244302	0.0547739	0.421791	0.163349	0.0807926	-0.58014	0.56279	-0.703	-0.652674	-1.00795	-0.051391	-0.0786545	-0.0773275	-0.641227	0.489079	0.715446	0.706649	0.328592	1.11373	0.0390642
8920	-0.312451	-0.306044	-0.533745	-0.0675028	0.136351	0.128887	-0.198688	0.422285	-0.51904	-0.491231	-0.938666	-0.0386116	0.399903	0.373564	-0.332645	0.810546	-0.685027	-0.606703	-1.23275	0.253742	-0.206652	-0.169856	-0.523996	0.506185	-0.213385	-0.172413	-0.575619	0.138799	0.251178	0.249102	0.0582622	0.434799	0.135849	0.054415	-0.605016	0.541076	-0.714655	-0.661688	-1.01031	-0.055426	-0.0492962	-0.0491144	-0.618759	0.502065	0.725449	0.719072	0.359549	1.11512	0.0489641
8960	-0.314399	-0.307837	-0.542026	-0.062797	0.136538	0.129412	-0.198673	0.420577	-0.527268	-0.499269	-0.931609	-0.0517586	0.428322	0.396823	-0.323959	0.833498	-0.688119	-0.614908	-1.23113	0.229118	-0.190292	-0.154202	-0.520369	0.536256	-0.2272	-0.190464	-0.626654	0.100817	0.257414	0.254386	0.0623164	0.447009	0.108517	0.0287363	-0.623328	0.518184	-0.726343	-0.670164	-1.01458	-0.0552058	-0.0185598	-0.0202296	-0.601758	0.516436	0.736092	0.731654	0.380519	1.10499	0.0566052
9000	-0.314797	-0.308244	-0.552231	-0.0594923	0.137166	0.130479	-0.207147	0.427504	-0.534917	-0.506936	-0.925971	-0.0720186	0.456209	0.419055	-0.301149	0.855443	-0.692746	-0.624694	-1.23328	0.2103	-0.171297	-0.13552	-0.512368	0.571766	-0.23919	-0.206882	-0.67075	0.0693172	0.264022	0.260134	0.0653361	0.460134	0.0814616	0.00393296	-0.637316	0.498051	-0.737989	-0.677939	-1.01884	-0.0600848	0.0134156	0.00916903	-0.581052	0.545972	0.74648	0.744009	0.410425	1.10298	0.0618445
9040	-0.313685	-0.307281	-0.554856	-0.0591083	0.138559	0.13221	-0.214201	0.440647	-0.542135	-0.514306	-0.92374	-0.0940522	0.480624	0.439808	-0.291401	0.877025	-0.698932	-0.635922	-1.23821	0.190507	-0.149697	-0.113781	-0.503658	0.597614	-0.249509	-0.22181	-0.71324	0.0424896	0.270956	0.266352	0.0657843	0.476897	0.0547924	-0.0199546	-0.653347	0.471962	-0.747788	-0.684591	-1.02168	-0.0614964	0.0464904	0.0390601	-0.550265	0.568029	0.754627	0.755173	0.438177	1.10036	0.063933
9080	-0.311099	-0.305	-0.564016	-0.0550693	0.140623	0.134601	-0.210988	0.452293	-0.549072	-0.521636	-0.91641	-0.111932	0.501498	0.45857	-0.283712	0.890151	-0.70694	-0.648394	-1.24548	0.172115	-0.125522	-0.0889001	-0.493778	0.619603	-0.258312	-0.235628	-0.744755	0.0190197	0.278168	0.273055	0.070012	0.491326	0.0286815	-0.0429004	-0.667559	0.440147	-0.754867	-0.68919	-1.02583	-0.052965	0.0805255	0.0694802	-0.525145	0.582526	0.76072	0.764752	0.464089	1.09653	0.0628749
9120	-0.307078	-0.301448	-0.569466	-0.0473247	0.143261	0.137568	-0.218867	0.451303	-0.555877	-0.529116	-0.911218	-0.127419	0.519052	0.475351	-0.276915	0.910664	-0.717266	-0.662049	-1.24665	0.140893	-0.0988007	-0.0607159	-0.483324	0.666233	-0.265754	-0.248429	-0.783235	-0.00471174	0.285612	0.280203	0.0752344	0.504776	0.00343569	-0.0649162	-0.684188	0.406732	-0.759328	-0.691352	-1.02799	-0.0433067	0.115381	0.100417	-0.47572	0.599575	0.765011	0.772609	0.475969	1.09613	0.0590299
9160	-0.30166	-0.29673	-0.572112	-0.0472413	0.146374	0.141022	-0.213356	0.467897	-0.562697	-0.536855	-0.902026	-0.14292	0.533508	0.490161	-0.271189	0.924958	-0.729761	-0.676829	-1.25133	0.10159	-0.0695645	-0.0290832	-0.46294	0.714953	-0.271989	-0.260227	-0.825354	-0.0140154	0.293242	0.287759	0.0801088	0.517965	-0.0208063	-0.0860221	-0.701126	0.374549	-0.761273	-0.691056	-1.03116	-0.0306598	0.150919	0.131834	-0.429032	0.616488	0.767758	0.778655	0.494707	1.09446	0.0527581
9200	-0.294882	-0.290944	-0.573113	-0.0386534	0.149863	0.144864	-0.218628	0.487876	-0.569682	-0.544951	-0.895759	-0.15798	0.545089	0.50293	-0.262439	0.936484	-0.744242	-0.692711	-1.25757	0.0796543	-0.0378431	0.00598886	-0.449412	0.750489	-0.277172	-0.270772	-0.864686	-0.0248639	0.301011	0.29566	0.085174	0.52985	-0.0439185	-0.106229	-0.719729	0.34336	-0.760804	-0.688369	-1.03634	-0.0165831	0.186998	0.163661	-0.391708	0.630031	0.769213	0.782946	0.498875	1.09059	0.0444193
9240	-0.286783	-0.284121	-0.574116	-0.0266217	0.15363	0.148984	-0.226137	0.506139	-0.576981	-0.553499	-0.890498	-0.167602	0.554017	0.513489	-0.258499	0.943918	-0.760529	-0.709685	-1.26322	0.0442817	-0.00366503	0.0441836	-0.428504	0.785444	-0.281458	-0.280029	-0.902413	-0.0190336	0.308743	0.303823	0.0877008	0.543056	-0.065775	-0.125539	-0.729902	0.31457	-0.758022	-0.683406	-1.04108	-0.014546	0.22348	0.195811	-0.35199	0.646088	0.769633	0.785636	0.504333	1.08793	0.0343735
9280	-0.2774	-0.276291	-0.57374	-0.0128287	0.157575	0.1532	-0.236257	0.527485	-0.584741	-0.562595	-0.887657	-0.184762	0.560513	0.521755	-0.261063	0.953031	-0.778442	-0.727839	-1.27224	0.00749051	0.0329745	0.0850976	-0.406094	0.838238	-0.285001	-0.288052	-0.937396	-0.0187214	0.315993	0.312183	0.0969943	0.55513	-0.08625	-0.143899	-0.744931	0.278567	-0.75303	-0.676302	-1.04073	-0.000602144	0.260172	0.22824	-0.333058	0.666626	0.769271	0.787023	0.512511	1.08782	0.0229805
9320	-0.266774	-0.2675	-0.57258	0.00590684	0.161602	0.157327	-0.245775	0.550579	-0.593113	-0.572317	-0.891887	-0.202646	0.5648	0.527746	-0.270154	0.959338	-0.7978	-0.747278	-1.28026	-0.00903179	0.0718172	0.128164	-0.384711	0.885076	-0.287969	-0.29472	-0.968847	-0.0131196	0.322746	0.320673	0.10479	0.56679	-0.105217	-0.161185	-0.765272	0.259848	-0.74593	-0.667189	-1.03995	0.0157635	0.296656	0.260863	-0.31758	0.685363	0.768382	0.78746	0.510989	1.08743	0.0106003
9360	-0.255018	-0.257801	-0.574686	0.0157387	0.16561	0.161228	-0.255884	0.581853	-0.602244	-0.582752	-0.895326	-0.221332	0.567101	0.531523	-0.259079	0.964974	-0.818422	-0.768006	-1.28312	-0.022532	0.112495	0.172759	-0.360543	0.928719	-0.290999	-0.299943	-0.995281	0.00126131	0.329022	0.329231	0.111478	0.576477	-0.122551	-0.177264	-0.787064	0.239051	-0.736824	-0.656204	-1.03949	0.0362341	0.33271	0.293567	-0.301729	0.699865	0.767222	0.787271	0.499065	1.08657	-0.00240721
9400	-0.24231	-0.247221	-0.568639	0.0304527	0.169502	0.164767	-0.26664	0.605891	-0.612283	-0.593983	-0.899865	-0.243678	0.567637	0.53317	-0.262151	0.973266	-0.840128	-0.789995	-1.29295	-0.05107	0.15464	0.218255	-0.34556	0.968779	-0.294209	-0.303732	-1.00405	0.00427315	0.334845	0.337811	0.12057	0.586288	-0.138126	-0.191887	-0.779687	0.217142	-0.725814	-0.643526	-1.03425	0.055479	0.368142	0.32618	-0.255241	0.7093	0.766044	0.786784	0.486275	1.08257	-0.0156821
9440	-0.228821	-0.235811	-0.558157	0.0428071	0.173179	0.16788	-0.278133	0.632348	-0.623379	-0.606061	-0.906065	-0.263738	0.566631	0.532819	-0.271687	0.98107	-0.862738	-0.813173	-1.30237	-0.0832349	0.197884	0.26381	-0.324171	1.02943	-0.297374	-0.30604	-1.01464	0.0196972	0.340234	0.346356	0.12761	0.591623	-0.151815	-0.204657	-0.781514	0.19595	-0.713001	-0.629335	-1.03048	0.0758702	0.402762	0.35855	-0.238642	0.721059	0.765105	0.786324	0.470437	1.08294	-0.0288646
9480	-0.214724	-0.223656	-0.549918	0.0568276	0.176543	0.170522	-0.288961	0.660351	-0.635628	-0.619013	-0.911808	-0.288866	0.564305	0.530616	-0.277607	0.989162	-0.886069	-0.837425	-1.31114	-0.10559	0.24186	0.308495	-0.312141	1.05892	-0.300265	-0.306677	-1.02873	0.0270486	0.345213	0.354777	0.133058	0.603179	-0.163493	-0.215161	-0.805914	0.190446	-0.698488	-0.613825	-1.0282	0.0922962	0.436378	0.390471	-0.188558	0.728011	0.764657	0.786167	0.451065	1.08696	-0.0415946
9520	-0.200189	-0.210918	-0.54604	0.0704962	0.179499	0.172535	-0.301201	0.687762	-0.648844	-0.632872	-0.917112	-0.313229	0.56088	0.526937	-0.285928	0.994859	-0.909943	-0.862551	-1.31977	-0.122849	0.286198	0.351753	-0.298438	1.10178	-0.302655	-0.305565	-1.03027	0.048128	0.349803	0.362814	0.143854	0.612886	-0.173033	-0.223277	-0.816656	0.180523	-0.682378	-0.59716	-1.02843	0.0918039	0.468798	0.421611	-0.144879	0.736593	0.764854	0.78622	0.439868	1.09582	-0.0535123
9560	-0.185389	-0.197805	-0.529646	0.0860984	0.182138	0.173881	-0.314721	0.701139	-0.662928	-0.647673	-0.925463	-0.338084	0.556697	0.522573	-0.29454	1.00238	-0.934178	-0.888378	-1.33004	-0.151977	0.330532	0.393143	-0.290639	1.14527	-0.304318	-0.302656	-1.03204	0.0662889	0.354025	0.369992	0.152702	0.622428	-0.180311	-0.228949	-0.806149	0.189637	-0.664771	-0.579728	-1.01523	0.109412	0.499832	0.451468	-0.0928888	0.747476	0.764867	0.78614	0.428894	1.1025	-0.0642577
9600	-0.170495	-0.18448	-0.519419	0.0975502	0.184558	0.174647	-0.324598	0.716077	-0.677806	-0.66335	-0.93773	-0.363946	0.552585	0.517612	-0.303301	1.01695	-0.958593	-0.914665	-1.34079	-0.174217	0.374492	0.432412	-0.279224	1.19173	-0.305026	-0.297987	-1.03093	0.0870543	0.357901	0.375986	0.16439	0.630657	-0.185199	-0.232161	-0.83188	0.194514	-0.646213	-0.561933	-1.00712	0.136675	0.529288	0.479722	-0.051825	0.763885	0.764285	0.785719	0.420577	1.10502	-0.073471
9640	-0.155679	-0.171201	-0.518699	0.112983	0.1868	0.174959	-0.340507	0.735218	-0.693404	-0.679797	-0.948141	-0.391514	0.548648	0.51209	-0.312139	1.02711	-0.982948	-0.941174	-1.35099	-0.191194	0.417711	0.469236	-0.26732	1.23771	-0.304551	-0.291764	-1.02635	0.116349	0.361453	0.380515	0.164555	0.630726	-0.187619	-0.232976	-0.846686	0.209529	-0.627705	-0.543945	-0.997706	0.157209	0.556975	0.506123	-0.0234233	0.780328	0.762886	0.784615	0.39863	1.10912	-0.0821696
9680	-0.141113	-0.158211	-0.511379	0.1255	0.188903	0.174999	-0.356671	0.75446	-0.709648	-0.696897	-0.96007	-0.420391	0.544864	0.50608	-0.319392	1.04248	-1.00667	-0.967673	-1.35945	-0.186317	0.459821	0.503488	-0.25893	1.26997	-0.302668	-0.284031	-1.01754	0.144751	0.364702	0.383517	0.170959	0.633081	-0.188341	-0.231496	-0.827933	0.215423	-0.609418	-0.52579	-0.988811	0.175674	0.582701	0.530549	-0.00788108	0.791937	0.760449	0.782459	0.386369	1.10591	-0.0927375
9720	-0.126968	-0.145593	-0.500901	0.139223	0.190905	0.174924	-0.37281	0.770046	-0.726463	-0.714513	-0.973256	-0.446857	0.54121	0.499766	-0.327454	1.05824	-1.02972	-0.993975	-1.37785	-0.222463	0.500454	0.535217	-0.246156	1.30294	-0.299148	-0.274793	-1.00518	0.174831	0.367671	0.384972	0.170774	0.630535	-0.187781	-0.227847	-0.818235	0.226777	-0.591496	-0.507476	-0.974872	0.191571	0.606275	0.552884	0.0203214	0.804086	0.756755	0.778983	0.372497	1.10966	-0.105167
9760	-0.113416	-0.133485	-0.492823	0.149505	0.192847	0.174988	-0.386393	0.786077	-0.743776	-0.732432	-0.98981	-0.470187	0.537663	0.493212	-0.348154	1.07097	-1.05215	-1.01994	-1.39598	-0.261231	0.539242	0.564561	-0.232507	1.34406	-0.293764	-0.264074	-1.00315	0.205036	0.37038	0.384869	0.170204	0.630594	-0.186075	-0.222218	-0.834669	0.240847	-0.574086	-0.489015	-0.961088	0.228619	0.627506	0.57304	0.0483598	0.817797	0.751583	0.773908	0.363308	1.11199	-0.119391
9800	-0.100628	-0.122072	-0.482644	0.160647	0.194768	0.175462	-0.401492	0.802856	-0.761512	-0.750546	-1.00564	-0.492018	0.5342	0.486203	-0.368006	1.08233	-1.07403	-1.04552	-1.41964	-0.294413	0.575817	0.591747	-0.222261	1.3776	-0.28629	-0.251767	-0.998533	0.235469	0.372622	0.383248	0.163577	0.62683	-0.183361	-0.214841	-0.840199	0.257129	-0.557334	-0.470432	-0.945082	0.259645	0.646202	0.590965	0.0775993	0.83668	0.744712	0.767056	0.348	1.11876	-0.135346
9840	-0.0887773	-0.11147	-0.470888	0.171848	0.196707	0.176442	-0.411639	0.817293	-0.779598	-0.768735	-1.01968	-0.512444	0.530798	0.478607	-0.382674	1.09255	-1.09542	-1.07066	-1.44543	-0.314534	0.610442	0.617084	-0.203782	1.42517	-0.276571	-0.237972	-0.970098	0.267684	0.373698	0.380163	0.164264	0.620465	-0.179773	-0.205972	-0.850969	0.281638	-0.541386	-0.451767	-0.927543	0.268466	0.662172	0.606681	0.106562	0.845156	0.73592	0.758261	0.331671	1.1233	-0.152964
9880	-0.0780479	-0.101757	-0.447393	0.179824	0.198704	0.178004	-0.419527	0.828663	-0.797958	-0.786826	-1.03495	-0.525157	0.527434	0.470384	-0.410675	1.10291	-1.11638	-1.09536	-1.47991	-0.352079	0.644805	0.640978	-0.19151	1.45674	-0.265099	-0.222805	-0.961078	0.330934	0.373536	0.375685	0.159403	0.616663	-0.175448	-0.196063	-0.879718	0.305954	-0.526389	-0.433262	-0.914227	0.267724	0.675672	0.620274	0.130134	0.855976	0.724989	0.74735	0.316891	1.12789	-0.172179
9920	-0.0686771	-0.0930067	-0.427592	0.196118	0.200797	0.180159	-0.428844	0.841928	-0.816519	-0.804666	-1.05086	-0.545876	0.524086	0.461616	-0.442108	1.10698	-1.13699	-1.11966	-1.50752	-0.387746	0.678763	0.663933	-0.180046	1.48746	-0.252179	-0.206495	-0.947453	0.365054	0.372108	0.369875	0.148792	0.610685	-0.170522	-0.185892	-0.884163	0.337669	-0.512487	-0.415257	-0.905489	0.29446	0.687221	0.631772	0.157708	0.865	0.711697	0.734138	0.306569	1.1292	-0.192927
9960	-0.0606472	-0.0852579	-0.420386	0.204582	0.203027	0.182887	-0.436869	0.859369	-0.835207	-0.822148	-1.06761	-0.568172	0.52073	0.452344	-0.462252	1.11026	-1.15729	-1.14364	-1.54639	-0.366548	0.712026	0.686678	-0.160265	1.52725	-0.238016	-0.189429	-0.935066	0.407554	0.369388	0.3628	0.141231	0.607724	-0.165132	-0.176542	-0.896927	0.358086	-0.499828	-0.398207	-0.894985	0.325556	0.696698	0.641227	0.177975	0.873631	0.695823	0.718509	0.289635	1.13439	-0.215141
10000	-0.0538869	-0.078533	-0.413963	0.213498	0.205433	0.186305	-0.440532	0.875695	-0.853948	-0.83914	-1.08575	-0.582974	0.517345	0.442667	-0.491571	1.1162	-1.17736	-1.16733	-1.59276	-0.404766	0.744304	0.70953	-0.143476	1.56107	-0.222817	-0.171946	-0.920641	0.463951	0.36535	0.354561	0.133911	0.600936	-0.159413	-0.168541	-0.912336	0.382764	-0.488557	-0.382596	-0.879671	0.343913	0.703975	0.648746	0.213661	0.88146	0.677147	0.700663	0.267194	1.13277	-0.238755
10040	-0.0483251	-0.072818	-0.405452	0.225649	0.208053	0.190548	-0.446178	0.883887	-0.872078	-0.855293	-1.1037	-0.598747	0.513906	0.433243	-0.526204	1.1224	-1.19727	-1.19077	-1.63501	-0.428745	0.775305	0.73253	-0.113078	1.58415	-0.206789	-0.154534	-0.89672	0.508215	0.359968	0.345365	0.126914	0.594444	-0.153501	-0.162222	-0.915753	0.411088	-0.478821	-0.36943	-0.866831	0.355581	0.708925	0.654247	0.24069	0.884723	0.655449	0.681457	0.233984	1.12882	-0.263703
10080	-0.0438904	-0.0680256	-0.403256	0.229591	0.210937	0.195505	-0.44639	0.894066	-0.88861	-0.870162	-1.11996	-0.612405	0.510392	0.424523	-0.55537	1.1329	-1.21706	-1.21411	-1.66326	-0.465148	0.80474	0.755643	-0.0903353	1.59998	-0.190136	-0.137306	-0.885655	0.558919	0.353214	0.335533	0.121948	0.579365	-0.147532	-0.157551	-0.916388	0.446498	-0.470765	-0.360066	-0.860616	0.358473	0.711419	0.657578	0.26451	0.884476	0.632694	0.661471	0.204616	1.12023	-0.28992
10120	-0.0405117	-0.0640484	-0.405343	0.235893	0.214158	0.201037	-0.443038	0.907861	-0.903501	-0.883685	-1.13403	-0.623504	0.506845	0.41671	-0.583943	1.13814	-1.23681	-1.23725	-1.69481	-0.510788	0.832317	0.778891	-0.0696419	1.61655	-0.173066	-0.120218	-0.861786	0.594785	0.345062	0.325346	0.112789	0.569448	-0.141644	-0.154324	-0.916839	0.474427	-0.464536	-0.354501	-0.850653	0.354095	0.711329	0.65853	0.285466	0.886275	0.610919	0.641229	0.182026	1.11975	-0.317339
10160	-0.0381177	-0.0608161	-0.398818	0.24103	0.217734	0.207026	-0.439162	0.92102	-0.91672	-0.89588	-1.1465	-0.636369	0.503889	0.409924	-0.592911	1.14587	-1.25658	-1.25992	-1.72741	-0.559278	0.857745	0.802021	-0.0401885	1.63414	-0.155784	-0.10328	-0.844171	0.638291	0.335487	0.314985	0.104654	0.556865	-0.135971	-0.152325	-0.934769	0.505765	-0.460143	-0.352468	-0.83905	0.352094	0.708528	0.656954	0.305583	0.879331	0.590201	0.621235	0.155845	1.12175	-0.345895
10200	-0.0366371	-0.058306	-0.396475	0.245769	0.221672	0.213356	-0.43546	0.933377	-0.928236	-0.9067	-1.16154	-0.645982	0.501539	0.404231	-0.606761	1.14969	-1.27641	-1.2818	-1.76239	-0.610506	0.880734	0.824617	0.00387522	1.65141	-0.138496	-0.0865645	-0.819705	0.678908	0.324461	0.30448	0.0944515	0.54542	-0.130649	-0.151343	-0.949218	0.530297	-0.456664	-0.353673	-0.829326	0.362764	0.702888	0.652705	0.317365	0.869382	0.57062	0.601897	0.131851	1.12135	-0.375522
10240	-0.0359988	-0.0565266	-0.39122	0.248648	0.225982	0.219932	-0.430488	0.936226	-0.938018	-0.916076	-1.16994	-0.660274	0.499616	0.399652	-0.612372	1.15123	-1.2941	-1.30247	-1.80035	-0.641587	0.900994	0.846137	0.037043	1.6584	-0.12141	-0.0706247	-0.798247	0.712177	0.311957	0.293918	0.0873151	0.527815	-0.125828	-0.151158	-0.958864	0.54614	-0.453842	-0.357828	-0.824016	0.360621	0.694281	0.645531	0.323436	0.864541	0.552254	0.583627	0.10991	1.12803	-0.406028
10280	-0.0361315	-0.0555024	-0.388428	0.24961	0.230673	0.226728	-0.426421	0.937723	-0.946036	-0.923971	-1.1765	-0.66665	0.49794	0.396199	-0.616027	1.15104	-1.30818	-1.32121	-1.83382	-0.698696	0.918233	0.865923	0.0815354	1.65978	-0.10473	-0.0554485	-0.772484	0.745125	0.29795	0.283297	0.0748318	0.517272	-0.121656	-0.151606	-0.973667	0.5577	-0.451606	-0.364664	-0.825551	0.367933	0.682579	0.635286	0.31272	0.859251	0.535181	0.566699	0.0916082	1.13619	-0.43622
10320	-0.0369639	-0.0552684	-0.385105	0.249906	0.235755	0.23372	-0.418173	0.94241	-0.952257	-0.93034	-1.18353	-0.670202	0.496332	0.393874	-0.619372	1.14919	-1.31854	-1.3374	-1.87048	-0.738177	0.932161	0.88329	0.129332	1.66668	-0.0886635	-0.0410286	-0.747792	0.767591	0.282413	0.272637	0.0615593	0.508878	-0.118263	-0.152491	-0.987383	0.566358	-0.449886	-0.373837	-0.827072	0.371814	0.667655	0.62183	0.295396	0.851262	0.519479	0.551388	0.0620862	1.13095	-0.46577
10360	-0.0384249	-0.0558263	-0.384588	0.246656	0.241235	0.240876	-0.406316	0.939273	-0.956653	-0.935114	-1.18847	-0.674334	0.494613	0.392659	-0.624894	1.1457	-1.32509	-1.35051	-1.9012	-0.768033	0.942487	0.897568	0.179366	1.65838	-0.073879	-0.0274433	-0.723559	0.791474	0.266062	0.261908	0.0520486	0.502024	-0.115776	-0.153677	-1.00185	0.572902	-0.44861	-0.384722	-0.825114	0.364079	0.64938	0.60503	0.284931	0.844956	0.505227	0.537889	0.0336268	1.13406	-0.494614
10400	-0.0404431	-0.0571843	-0.381371	0.244315	0.247123	0.248197	-0.396409	0.931057	-0.95919	-0.938233	-1.19593	-0.674056	0.492604	0.392396	-0.621764	1.14126	-1.32772	-1.36	-1.92505	-0.799487	0.948929	0.908176	0.22853	1.63575	-0.0616895	-0.0147675	-0.701151	0.801907	0.250926	0.251089	0.0408303	0.490087	-0.114324	-0.155239	-1.01346	0.580426	-0.447709	-0.396617	-0.835337	0.359855	0.627627	0.584887	0.248603	0.840843	0.492504	0.526311	0.0111683	1.12828	-0.522693
10440	-0.0430007	-0.0593593	-0.379363	0.241585	0.253428	0.255684	-0.387513	0.926533	-0.95984	-0.939681	-1.19665	-0.677063	0.490124	0.392793	-0.61843	1.13612	-1.32633	-1.36533	-1.95024	-0.829954	0.951484	0.914753	0.274287	1.62081	-0.0519342	-0.0030721	-0.674815	0.826268	0.23717	0.240173	0.0250096	0.481404	-0.114036	-0.157442	-1.01822	0.578173	-0.447113	-0.408766	-0.838127	0.342613	0.602239	0.561453	0.221854	0.834157	0.481386	0.516814	-0.0107753	1.1294	-0.549945
10480	-0.0463262	-0.0623563	-0.381839	0.240736	0.26016	0.263182	-0.378375	0.925216	-0.95857	-0.93947	-1.19149	-0.6767	0.486995	0.393679	-0.615491	1.13021	-1.32082	-1.36613	-1.96979	-0.843755	0.950127	0.917065	0.301535	1.5924	-0.0443631	0.00734857	-0.646993	0.835312	0.224845	0.229353	0.0148657	0.470339	-0.115039	-0.16054	-1.02554	0.581929	-0.446751	-0.420377	-0.834573	0.340065	0.57244	0.534631	0.18455	0.833775	0.471954	0.508923	-0.039707	1.13821	-0.576308
10520	-0.0503926	-0.0661354	-0.383341	0.242318	0.267326	0.270269	-0.366904	0.91464	-0.955349	-0.937661	-1.18751	-0.675263	0.483036	0.394525	-0.615728	1.12485	-1.31108	-1.36181	-1.9887	-0.842403	0.944741	0.914939	0.334987	1.56699	-0.0387261	0.0162279	-0.61019	0.833822	0.214003	0.218905	0.0031503	0.461054	-0.117462	-0.164752	-1.03122	0.589011	-0.446552	-0.430288	-0.833181	0.339101	0.538253	0.504307	0.139469	0.82914	0.464286	0.500897	-0.061934	1.13755	-0.601721
10560	-0.0551261	-0.0705883	-0.387356	0.235201	0.274936	0.276877	-0.359837	0.912397	-0.950159	-0.934581	-1.18707	-0.668336	0.47807	0.394788	-0.612593	1.12084	-1.29701	-1.35163	-2.00696	-0.830938	0.935207	0.90842	0.356302	1.53993	-0.0347732	0.0234918	-0.576802	0.811243	0.204695	0.209321	-0.00570218	0.45274	-0.121434	-0.170155	-1.03864	0.580218	-0.446445	-0.435834	-0.828975	0.33363	0.500119	0.470553	0.0699493	0.820584	0.458459	0.491866	-0.090182	1.13384	-0.626124
10600	-0.0604525	-0.075638	-0.390121	0.229403	0.282999	0.283045	-0.355818	0.897069	-0.943418	-0.930333	-1.18548	-0.665873	0.471916	0.394146	-0.608461	1.11008	-1.27851	-1.3355	-2.01318	-0.807588	0.921407	0.897769	0.366578	1.51477	-0.0322543	0.0291918	-0.542146	0.815992	0.196973	0.200886	-0.017728	0.443316	-0.127082	-0.176761	-1.04362	0.567893	-0.446362	-0.436308	-0.818414	0.347942	0.45848	0.433486	0.00366004	0.81228	0.453823	0.481685	-0.11337	1.1329	-0.649454
10640	-0.0662978	-0.0811782	-0.39133	0.230519	0.291247	0.288775	-0.351497	0.892957	-0.935374	-0.924847	-1.18185	-0.659435	0.464394	0.39224	-0.601409	1.09413	-1.25548	-1.31357	-2.01076	-0.788816	0.903222	0.883304	0.377266	1.4828	-0.0309193	0.0333105	-0.50547	0.807681	0.190889	0.193809	-0.0284578	0.439892	-0.134534	-0.184563	-1.04507	0.52936	-0.446231	-0.432153	-0.802061	0.363843	0.413776	0.393384	-0.044868	0.795626	0.447772	0.47032	-0.136162	1.1299	-0.671651
10680	-0.0725881	-0.0871466	-0.394324	0.226171	0.299117	0.294054	-0.339182	0.881393	-0.926063	-0.918076	-1.17267	-0.656041	0.455302	0.388687	-0.594841	1.07421	-1.22781	-1.28595	-2.02149	-0.757625	0.880535	0.865295	0.399782	1.44457	-0.0305183	0.0355926	-0.467161	0.797191	0.186495	0.18815	-0.0400444	0.432765	-0.14392	-0.193546	-1.04893	0.517926	-0.445981	-0.424022	-0.780839	0.369088	0.366448	0.350597	-0.109378	0.76982	0.44025	0.457814	-0.15745	1.12418	-0.692654
10720	-0.0792493	-0.093444	-0.400229	0.217827	0.306421	0.298835	-0.328321	0.869017	-0.915521	-0.910061	-1.15885	-0.649896	0.443999	0.383156	-0.589287	1.0506	-1.1954	-1.25289	-2.02547	-0.730449	0.853228	0.843998	0.407441	1.40398	-0.0308011	0.0360845	-0.4276	0.793468	0.183841	0.183949	-0.0495568	0.430384	-0.155368	-0.203668	-1.0517	0.503628	-0.445529	-0.412573	-0.765562	0.37613	0.316938	0.30536	-0.172729	0.74735	0.431467	0.444251	-0.190774	1.11647	-0.7124
10760	-0.0862073	-0.0999877	-0.4111	0.217241	0.312983	0.302962	-0.317484	0.857196	-0.903785	-0.900824	-1.14116	-0.6447	0.430326	0.375375	-0.59288	1.02577	-1.15815	-1.21461	-2.02331	-0.701717	0.821182	0.819764	0.414925	1.38475	-0.0315177	0.0350099	-0.38856	0.786224	0.18298	0.181218	-0.0592707	0.432234	-0.169005	-0.214826	-1.04487	0.484369	-0.442964	-0.398472	-0.754551	0.381548	0.265686	0.257925	-0.241923	0.717774	0.421633	0.429849	-0.216789	1.10668	-0.730829
10800	-0.0933881	-0.106737	-0.417755	0.219124	0.318623	0.30636	-0.303179	0.84079	-0.890891	-0.890329	-1.12994	-0.634004	0.414365	0.365095	-0.604224	1.00128	-1.11643	-1.17147	-2.01939	-0.665719	0.784278	0.792841	0.409222	1.35091	-0.032418	0.0327232	-0.352453	0.770213	0.183962	0.179934	-0.0728714	0.435325	-0.18457	-0.226906	-1.03912	0.454678	-0.437012	-0.382367	-0.744279	0.393021	0.213134	0.208669	-0.309448	0.687215	0.410956	0.41484	-0.243754	1.09546	-0.747879
10840	-0.100718	-0.113655	-0.4224	0.218334	0.323162	0.308917	-0.278859	0.818925	-0.876874	-0.878556	-1.11746	-0.625266	0.396198	0.352104	-0.617586	0.975399	-1.07127	-1.12407	-2.00544	-0.604522	0.7424	0.763592	0.402342	1.31556	-0.033252	0.0294116	-0.319557	0.760308	0.186841	0.180088	-0.0810099	0.439083	-0.199523	-0.239679	-1.03919	0.425805	-0.427722	-0.364875	-0.735376	0.407282	0.159722	0.158019	-0.374248	0.646709	0.399647	0.399478	-0.274182	1.0812	-0.76349
10880	-0.108122	-0.120708	-0.427794	0.215456	0.326422	0.310532	-0.267913	0.784163	-0.861772	-0.865456	-1.09255	-0.611441	0.375906	0.336332	-0.62512	0.94401	-1.02292	-1.07297	-2.00352	-0.565253	0.695429	0.732551	0.391343	1.30005	-0.0332819	0.0251587	-0.287621	0.760878	0.191667	0.181659	-0.0897982	0.450674	-0.213472	-0.252727	-1.03531	0.411891	-0.415142	-0.346414	-0.724572	0.420248	0.105892	0.106395	-0.432476	0.614859	0.387916	0.384105	-0.306152	1.06619	-0.776661
10920	-0.115528	-0.127871	-0.443298	0.214523	0.328224	0.311094	-0.245242	0.751355	-0.845621	-0.850951	-1.07862	-0.600479	0.353573	0.317793	-0.639524	0.909585	-0.971592	-1.01871	-1.97379	-0.524302	0.643246	0.700282	0.37156	1.28092	-0.0320944	0.0200288	-0.253238	0.748832	0.197692	0.184609	-0.10176	0.461584	-0.226528	-0.265648	-1.02866	0.393996	-0.399321	-0.32733	-0.716753	0.429354	0.0520841	0.0541828	-0.495789	0.570389	0.37597	0.368983	-0.314282	1.06746	-0.786556
10960	-0.12286	-0.135169	-0.452445	0.207987	0.328389	0.310539	-0.231084	0.72777	-0.828456	-0.834956	-1.06173	-0.589656	0.329279	0.296456	-0.65338	0.870654	-0.917508	-0.961963	-1.95335	-0.485906	0.585733	0.666843	0.350931	1.29615	-0.0300394	0.0140466	-0.235679	0.704047	0.202979	0.188793	-0.109506	0.474314	-0.238802	-0.27807	-1.01867	0.374981	-0.380309	-0.307901	-0.701757	0.410106	-0.00126008	0.00194124	-0.565826	0.522142	0.364021	0.354503	-0.329984	1.04641	-0.793455
11000	-0.130189	-0.142626	-0.465076	0.211342	0.326739	0.308918	-0.222036	0.714039	-0.810315	-0.817465	-1.04706	-0.582856	0.303107	0.272625	-0.675568	0.832026	-0.860888	-0.903528	-1.92042	-0.445878	0.52488	0.632124	0.32392	1.31673	-0.0274675	0.00718591	-0.233658	0.664528	0.207419	0.193893	-0.118111	0.489096	-0.250402	-0.290002	-1.01035	0.35504	-0.358155	-0.288405	-0.67785	0.39626	-0.0536997	-0.0497254	-0.628087	0.48999	0.352278	0.34146	-0.344358	1.02069	-0.797634
11040	-0.137946	-0.150355	-0.477829	0.201105	0.323095	0.30624	-0.207423	0.699732	-0.791232	-0.798457	-1.03223	-0.573286	0.275139	0.246843	-0.699553	0.790704	-0.801954	-0.844204	-1.8879	-0.39486	0.465458	0.596442	0.296252	1.33468	-0.0247294	-0.00056117	-0.265481	0.644259	0.210995	0.19913	-0.12926	0.502173	-0.261438	-0.30147	-0.998436	0.332085	-0.332908	-0.26843	-0.664724	0.406921	-0.104375	-0.100059	-0.695635	0.451605	0.34095	0.330165	-0.354317	1.00253	-0.799374
11080	-0.146134	-0.158408	-0.48758	0.19081	0.317279	0.302445	-0.192948	0.686036	-0.771246	-0.778115	-1.02721	-0.548309	0.245457	0.219465	-0.711231	0.748552	-0.740926	-0.784661	-1.83992	-0.331333	0.407557	0.559793	0.268785	1.35852	-0.0221757	-0.00911283	-0.303489	0.610893	0.213686	0.203872	-0.135661	0.517035	-0.272022	-0.312497	-0.985078	0.315568	-0.304616	-0.24755	-0.663609	0.406192	-0.151031	-0.14856	-0.752447	0.412385	0.330248	0.320522	-0.36203	0.979033	-0.798954
11120	-0.154716	-0.166827	-0.505435	0.190579	0.309111	0.297545	-0.18324	0.67187	-0.750506	-0.756676	-1.02433	-0.525285	0.214143	0.190817	-0.726958	0.716534	-0.678025	-0.725315	-1.81571	-0.275799	0.351069	0.521976	0.227545	1.38166	-0.0201568	-0.0183821	-0.34109	0.600097	0.215474	0.207583	-0.144846	0.527873	-0.282263	-0.323105	-0.974848	0.296411	-0.273329	-0.225728	-0.668859	0.395862	-0.193611	-0.195076	-0.800569	0.379661	0.320389	0.312386	-0.373206	0.970049	-0.796652
11160	-0.163656	-0.175627	-0.524284	0.189235	0.298466	0.291628	-0.17296	0.661901	-0.729724	-0.734394	-1.02127	-0.482771	0.181278	0.161284	-0.745842	0.674455	-0.61347	-0.666722	-1.78465	-0.216692	0.295886	0.482935	0.184467	1.42042	-0.0190236	-0.0283486	-0.377031	0.60791	0.216339	0.210115	-0.152161	0.544595	-0.29227	-0.333309	-0.967056	0.258599	-0.239096	-0.202887	-0.663682	0.402958	-0.23237	-0.239631	-0.854818	0.346784	0.311707	0.305521	-0.382175	0.957746	-0.792747
11200	-0.172918	-0.184762	-0.539633	0.183701	0.287203	0.284873	-0.168775	0.647157	-0.709013	-0.711573	-1.01829	-0.454457	0.146945	0.131295	-0.767907	0.638802	-0.547484	-0.609397	-1.75604	-0.16234	0.241901	0.442556	0.138903	1.51728	-0.0191264	-0.0390379	-0.41225	0.630366	0.216263	0.211327	-0.155344	0.553226	-0.302154	-0.343258	-0.975062	0.243506	-0.201965	-0.179058	-0.666729	0.443884	-0.267564	-0.281908	-0.911342	0.325814	0.304125	0.299633	-0.36847	0.941931	-0.787519
11240	-0.182466	-0.194191	-0.562849	0.183487	0.276319	0.277558	-0.163396	0.638341	-0.688367	-0.688489	-1.01908	-0.426885	0.111259	0.101238	-0.789637	0.606673	-0.480285	-0.553985	-1.72384	-0.105324	0.189004	0.400918	0.0819602	1.55394	-0.020816	-0.0502081	-0.447191	0.663501	0.215226	0.211178	-0.167395	0.560959	-0.312025	-0.353116	-0.971207	0.234947	-0.161986	-0.154194	-0.657487	0.475598	-0.299448	-0.321796	-0.947502	0.296991	0.297423	0.294361	-0.37857	0.925193	-0.781245
11280	-0.192264	-0.203884	-0.588392	0.185448	0.265828	0.269805	-0.153304	0.625762	-0.667782	-0.665352	-1.02308	-0.382273	0.0769113	0.0714225	-0.811781	0.564523	-0.412096	-0.500932	-1.702	-0.0560507	0.137088	0.3581	0.02707	1.59568	-0.0244428	-0.0612266	-0.48768	0.703351	0.213209	0.209617	-0.181762	0.562548	-0.321992	-0.363001	-0.973136	0.225684	-0.119208	-0.128289	-0.651354	0.492675	-0.328277	-0.359429	-1.00158	0.261278	0.291383	0.289343	-0.38471	0.906663	-0.774205
11320	-0.202276	-0.213821	-0.60716	0.187327	0.255741	0.261726	-0.145075	0.614929	-0.647252	-0.642446	-1.02505	-0.334365	0.045708	0.0421632	-0.834384	0.52526	-0.343135	-0.450345	-1.67867	0.00321879	0.0860449	0.315328	-0.0335545	1.60876	-0.0303576	-0.0718123	-0.531144	0.745952	0.210194	0.20665	-0.192458	0.55902	-0.332167	-0.373173	-0.976032	0.205425	-0.0751414	-0.101375	-0.649446	0.508893	-0.354307	-0.394554	-1.05387	0.250093	0.285783	0.284222	-0.381572	0.886015	-0.766678
11360	-0.212465	-0.223986	-0.624505	0.189268	0.24607	0.253379	-0.140716	0.596635	-0.626772	-0.620069	-1.02871	-0.277909	0.0178479	0.0138864	-0.857489	0.492294	-0.274804	-0.402358	-1.64918	0.0532151	0.0357671	0.272745	-0.0921572	1.62026	-0.0388527	-0.0820372	-0.571535	0.78734	0.20616	0.202296	-0.202313	0.556989	-0.342659	-0.384078	-0.984092	0.2046	-0.0335301	-0.0736483	-0.638314	0.542869	-0.377793	-0.42699	-1.08825	0.236673	0.280406	0.278636	-0.376536	0.862888	-0.758942
11400	-0.222795	-0.234349	-0.642049	0.183049	0.236828	0.244815	-0.142865	0.586284	-0.606338	-0.598437	-1.03101	-0.230785	-0.00647073	-0.0128922	-0.876374	0.462564	-0.214041	-0.357222	-1.61432	0.101957	-0.0138535	0.230621	-0.151442	1.66091	-0.0486318	-0.0918834	-0.606301	0.823551	0.20109	0.196579	-0.213445	0.552957	-0.353817	-0.395946	-0.985149	0.20127	0.00552235	-0.0455334	-0.625279	0.556885	-0.39899	-0.457006	-1.1266	0.223335	0.27503	0.272234	-0.371486	0.846441	-0.751277
11440	-0.233231	-0.244917	-0.656692	0.182457	0.228027	0.236078	-0.137207	0.577106	-0.585945	-0.57775	-1.03222	-0.18494	-0.0270495	-0.0376854	-0.907233	0.439142	-0.161343	-0.315086	-1.57515	0.169328	-0.062925	0.189444	-0.211258	1.65573	-0.0586866	-0.101005	-0.642092	0.850621	0.194963	0.189518	-0.224487	0.546509	-0.365792	-0.408991	-0.989421	0.168514	0.0421055	-0.0172905	-0.620814	0.573494	-0.418154	-0.484704	-1.19246	0.230642	0.269438	0.264619	-0.378388	0.8342	-0.743962
11480	-0.243735	-0.255734	-0.663968	0.185022	0.219679	0.227376	-0.148057	0.565103	-0.565587	-0.558167	-1.03564	-0.129345	-0.0436901	-0.0597995	-0.932364	0.416399	-0.115989	-0.276194	-1.53535	0.221178	-0.111555	0.149891	-0.273868	1.64867	-0.0685502	-0.10913	-0.677712	0.864585	0.187774	0.181141	-0.235897	0.534106	-0.378483	-0.423105	-0.98643	0.147696	0.076309	0.0108861	-0.609732	0.621401	-0.435539	-0.510274	-1.23851	0.236218	0.263409	0.255426	-0.381723	0.82656	-0.736474
11520	-0.254273	-0.266871	-0.674055	0.183221	0.211796	0.218936	-0.149992	0.560175	-0.545261	-0.540067	-1.03825	-0.084654	-0.0561942	-0.0781236	-0.939174	0.396799	-0.0772585	-0.241344	-1.50579	0.276261	-0.159852	0.112933	-0.33203	1.60705	-0.0777554	-0.11592	-0.712735	0.860552	0.17951	0.17151	-0.247366	0.523904	-0.391792	-0.438131	-0.997726	0.139275	0.108222	0.0387284	-0.580298	0.637728	-0.451402	-0.534123	-1.26673	0.232824	0.256724	0.24449	-0.372227	0.815307	-0.725327
11560	-0.26507	-0.278445	-0.692915	0.176466	0.204391	0.210788	-0.151587	0.550963	-0.52496	-0.523752	-1.04043	-0.0314513	-0.0643633	-0.0922837	-0.966248	0.381865	-0.0444289	-0.211162	-1.47808	0.318678	-0.207135	0.0791937	-0.386039	1.63029	-0.0858351	-0.121099	-0.744535	0.85006	0.170121	0.160704	-0.258763	0.509725	-0.405618	-0.453884	-1.01266	0.120242	0.137936	0.0660206	-0.549701	0.67917	-0.465996	-0.556587	-1.32435	0.229099	0.249162	0.231789	-0.377097	0.79147	-0.710336
11600	-0.276629	-0.290491	-0.704285	0.168471	0.197475	0.202932	-0.149267	0.54198	-0.504681	-0.509205	-1.04128	0.0149753	-0.0679992	-0.102296	-0.977745	0.368711	-0.0167792	-0.185374	-1.43689	0.354107	-0.24233	0.0492956	-0.432603	1.51799	-0.0923222	-0.123818	-0.774215	0.861637	0.159551	0.148802	-0.273743	0.495654	-0.419862	-0.470187	-1.01127	0.0932632	0.165538	0.0925743	-0.529475	0.697802	-0.479579	-0.577856	-1.35347	0.226549	0.240506	0.217395	-0.393458	0.768511	-0.6918
11640	-0.288915	-0.303065	-0.717691	0.16036	0.191061	0.195368	-0.146891	0.532478	-0.484417	-0.496381	-1.04374	0.0599298	-0.0669034	-0.108197	-0.983047	0.353947	0.00641177	-0.163524	-1.43181	0.384098	-0.26289	0.0239119	-0.4817	1.42329	-0.0967496	-0.123307	-0.793318	0.83752	0.147748	0.135798	-0.28684	0.483797	-0.434424	-0.486838	-1.02673	0.0621752	0.191119	0.118229	-0.500095	0.709394	-0.493908	-0.598238	-1.38001	0.218006	0.230535	0.201406	-0.397994	0.738772	-0.670021
11680	-0.301873	-0.316222	-0.736481	0.14937	0.185162	0.188065	-0.146092	0.528622	-0.464051	-0.485229	-1.04639	0.0988902	-0.0608777	-0.110125	-0.980335	0.353414	0.0258655	-0.145166	-1.39474	0.407864	-0.270187	0.0038504	-0.521371	1.26733	-0.0986502	-0.119122	-0.797714	0.847746	0.134657	0.121648	-0.301152	0.471156	-0.449206	-0.503543	-1.04881	0.0393435	0.214769	0.142841	-0.459932	0.733506	-0.51117	-0.618014	-1.39343	0.203148	0.219409	0.183941	-0.403534	0.718648	-0.645298
11720	-0.315452	-0.329974	-0.755007	0.138335	0.179693	0.180957	-0.151508	0.518602	-0.44365	-0.475735	-1.04465	0.132332	-0.0497237	-0.108283	-0.972655	0.351505	0.0423033	-0.129489	-1.36928	0.437324	-0.265592	-0.0106947	-0.55606	1.17457	-0.0975569	-0.110617	-0.785698	0.843904	0.120224	0.106304	-0.313883	0.449592	-0.464108	-0.520026	-1.06465	0.0276166	0.236577	0.166262	-0.431659	0.737965	-0.530866	-0.637301	-1.41066	0.197409	0.20756	0.165074	-0.406104	0.692231	-0.617931
11760	-0.329596	-0.34433	-0.773454	0.132304	0.174106	0.174021	-0.157279	0.503136	-0.423746	-0.467943	-1.04182	0.157113	-0.0332431	-0.102796	-0.965966	0.347595	0.0564466	-0.115257	-1.38024	0.458	-0.250478	-0.0192319	-0.585286	1.08235	-0.0930026	-0.0973732	-0.764788	0.834622	0.104395	0.0897318	-0.323744	0.429085	-0.479029	-0.535975	-1.08493	-0.000487787	0.256632	0.188383	-0.404585	0.742709	-0.552464	-0.656208	-1.41895	0.183258	0.194744	0.144855	-0.413728	0.671177	-0.588221
11800	-0.344253	-0.359274	-0.790938	0.123855	0.168261	0.167256	-0.163272	0.506427	-0.404881	-0.461896	-1.04267	0.182604	-0.0112373	-0.0939091	-0.960061	0.346812	0.0690166	-0.101488	-1.36499	0.480208	-0.226214	-0.0212548	-0.618252	1.11869	-0.0845201	-0.0794118	-0.744687	0.822039	0.0871168	0.0718834	-0.342318	0.406708	-0.493872	-0.55109	-1.10401	-0.0152145	0.275025	0.209035	-0.375668	0.740908	-0.575431	-0.674598	-1.43159	0.164135	0.180703	0.123338	-0.426065	0.644073	-0.556466
11840	-0.35937	-0.374765	-0.806167	0.108068	0.162101	0.160657	-0.173746	0.497124	-0.387595	-0.457675	-1.03973	0.201919	0.0122438	-0.0820166	-0.936694	0.360458	0.0807348	-0.0874044	-1.346	0.503441	-0.194172	-0.016944	-0.649817	1.21249	-0.0716425	-0.0570495	-0.69683	0.808231	0.0683353	0.0526912	-0.358602	0.380831	-0.508535	-0.565097	-1.11576	-0.031285	0.291845	0.228006	-0.339674	0.7508	-0.599234	-0.692182	-1.44589	0.156985	0.16518	0.100524	-0.444008	0.615594	-0.522969
11880	-0.374893	-0.390727	-0.818808	0.090554	0.155565	0.154208	-0.175108	0.489181	-0.372431	-0.455403	-1.03523	0.210967	0.0330591	-0.0678694	-0.939138	0.36713	0.0923224	-0.0721409	-1.35989	0.518242	-0.155724	-0.00705493	-0.679603	1.2772	-0.054129	-0.030658	-0.658803	0.795269	0.0479966	0.0321097	-0.377765	0.364441	-0.52292	-0.577948	-1.12193	-0.0497241	0.307229	0.2452	-0.302547	0.756641	-0.623342	-0.708827	-1.45949	0.138798	0.147918	0.0764063	-0.456597	0.588409	-0.488027
11920	-0.390769	-0.406957	-0.83105	0.0849836	0.148597	0.147851	-0.183844	0.485888	-0.359928	-0.455188	-1.03025	0.215577	0.0512689	-0.0521608	-0.927149	0.3754	0.104425	-0.0550808	-1.31781	0.531094	-0.112241	0.0071153	-0.713421	1.3765	-0.033144	-0.000851957	-0.607329	0.785224	0.0260468	0.0101014	-0.394137	0.337369	-0.536927	-0.589835	-1.12968	-0.0527908	0.321746	0.260612	-0.2775	0.757878	-0.647221	-0.724243	-1.45748	0.129539	0.128657	0.0510441	-0.458306	0.561926	-0.451942
11960	-0.406945	-0.423041	-0.856894	0.0721414	0.141137	0.141188	-0.197825	0.485491	-0.350629	-0.457178	-1.02836	0.205397	0.0669337	-0.0357123	-0.918175	0.39918	0.114889	-0.0359197	-1.25854	0.550473	-0.0650933	0.0244105	-0.742646	1.43107	-0.00914158	0.0316779	-0.555579	0.772083	0.00243205	-0.0133082	-0.417782	0.307339	-0.550736	-0.600925	-1.13371	-0.0600354	0.335565	0.274261	-0.25144	0.749201	-0.67034	-0.738005	-1.4637	0.0991059	0.107142	0.0247547	-0.473585	0.525523	-0.415014
12000	-0.423366	-0.438708	-0.865389	0.0660852	0.133128	0.133464	-0.211072	0.481107	-0.345074	-0.461196	-1.02633	0.190932	0.0801141	-0.0206371	-0.915041	0.433872	0.122818	-0.0149716	-1.20775	0.565616	-0.0156534	0.0434748	-0.780869	1.40434	0.0176203	0.066187	-0.4884	0.753013	-0.0229015	-0.0379786	-0.439136	0.283136	-0.565114	-0.611303	-1.13689	-0.0651834	0.348723	0.286177	-0.247674	0.736789	-0.692166	-0.750052	-1.46161	0.097554	0.0831134	-0.00207377	-0.487651	0.487656	-0.377543
12040	-0.439981	-0.453245	-0.871998	0.0557921	0.124509	0.124604	-0.214503	0.468661	-0.343805	-0.466595	-1.02723	0.173147	0.0908705	-0.00798015	-0.90709	0.469072	0.128717	0.00693273	-1.12262	0.599573	0.0347079	0.0635584	-0.827318	1.41215	0.0468837	0.102067	-0.428565	0.736646	-0.0493788	-0.063376	-0.460255	0.257629	-0.579888	-0.620991	-1.13768	-0.0745458	0.361255	0.296833	-0.228238	0.723088	-0.712166	-0.760416	-1.4636	0.100459	0.0563148	-0.0292712	-0.502662	0.446288	-0.339828
12080	-0.456735	-0.466451	-0.89646	0.0401233	0.115224	0.114573	-0.228168	0.462974	-0.347362	-0.473317	-1.02228	0.144379	0.0992635	0.00223307	-0.908288	0.503941	0.133094	0.0296578	-1.03367	0.621359	0.0846192	0.0842399	-0.87702	1.39154	0.0783908	0.138681	-0.370518	0.766987	-0.0757258	-0.089148	-0.488012	0.234039	-0.594803	-0.630019	-1.13845	-0.070079	0.373198	0.306649	-0.207571	0.71476	-0.729808	-0.769249	-1.45579	0.088322	0.0264882	-0.056814	-0.523378	0.410577	-0.30216
12120	-0.472429	-0.477947	-0.9149	0.0367379	0.105214	0.10323	-0.250225	0.456569	-0.356288	-0.481519	-1.02042	0.121988	0.105353	0.00997244	-0.899289	0.541217	0.136456	0.0531566	-0.9261	0.632418	0.132709	0.104027	-0.92405	1.33086	0.111884	0.175631	-0.289945	0.769291	-0.10181	-0.114966	-0.510521	0.210466	-0.609606	-0.638413	-1.14081	-0.0734896	0.384586	0.315925	-0.201681	0.708383	-0.74456	-0.776756	-1.45812	0.0628101	-0.00662388	-0.0846299	-0.535537	0.373804	-0.264132
12160	-0.485656	-0.487561	-0.923802	0.0250099	0.09442	0.0905036	-0.261572	0.461891	-0.371123	-0.49123	-1.01129	0.0916653	0.109201	0.0151135	-0.901417	0.585092	0.13931	0.0772419	-0.838065	0.661878	0.176847	0.121438	-1.00698	1.2208	0.147104	0.212724	-0.204142	0.808003	-0.127529	-0.140637	-0.534456	0.194192	-0.624042	-0.646193	-1.14728	-0.0827562	0.395456	0.32491	-0.199733	0.698603	-0.755888	-0.783391	-1.44538	0.031562	-0.0432791	-0.112651	-0.558917	0.330799	-0.225425
12200	-0.496523	-0.495326	-0.934684	0.010231	0.0827838	0.076322	-0.276767	0.453578	-0.392358	-0.502339	-1.00663	0.0588007	0.110866	0.0172265	-0.904452	0.629048	0.142162	0.101406	-0.730362	0.672136	0.21546	0.136308	-1.07739	1.09078	0.183795	0.249909	-0.117353	0.832247	-0.152785	-0.165931	-0.556337	0.169436	-0.637857	-0.653363	-1.15313	-0.0950855	0.405843	0.333883	-0.187632	0.685421	-0.763384	-0.78946	-1.44393	0.0168638	-0.0830446	-0.140848	-0.575915	0.290332	-0.186071
12240	-0.50514	-0.501335	-0.94407	-0.00393864	0.0702469	0.0606764	-0.294198	0.424929	-0.416417	-0.514884	-1.00229	0.0237764	0.110411	0.0163839	-0.906358	0.665153	0.14552	0.125035	-0.625874	0.688231	0.249017	0.148506	-1.16725	0.959988	0.221698	0.287329	-0.0405204	0.87623	-0.177475	-0.190674	-0.581399	0.149473	-0.650797	-0.659896	-1.15529	-0.107847	0.415784	0.343059	-0.191838	0.674868	-0.770477	-0.795096	-1.43619	-0.0136177	-0.121054	-0.169328	-0.602496	0.249137	-0.146102
12280	-0.511621	-0.505684	-0.95476	-0.00368615	0.0563166	0.0436109	-0.317186	0.409557	-0.440784	-0.528867	-0.996797	-0.0158061	0.107894	0.0128927	-0.907529	0.688184	0.14989	0.147841	-0.521147	0.704208	0.278017	0.15782	-1.2803	0.873554	0.260555	0.325094	0.0376359	0.911491	-0.2015	-0.214704	-0.603373	0.130973	-0.662608	-0.665731	-1.16519	-0.124166	0.425313	0.352491	-0.189676	0.663281	-0.778748	-0.800705	-1.42922	-0.0635612	-0.156305	-0.198109	-0.625168	0.208642	-0.105552
12320	-0.516076	-0.508534	-0.956659	-0.000855628	0.0402727	0.0251861	-0.326486	0.393672	-0.465357	-0.544112	-0.994607	-0.0581409	0.103376	0.00682146	-0.906701	0.715741	0.15578	0.169507	-0.466712	0.72415	0.302954	0.16391	-1.39482	0.917442	0.300108	0.36343	0.118044	0.937318	-0.224759	-0.237894	-0.630316	0.109253	-0.673037	-0.670787	-1.16789	-0.139275	0.434466	0.361874	-0.206666	0.667024	-0.787935	-0.806682	-1.42623	-0.114908	-0.18879	-0.22699	-0.651499	0.169153	-0.0644518
12360	-0.518617	-0.510067	-0.955018	-0.00952698	0.0222337	0.0054955	-0.343416	0.384375	-0.490038	-0.56037	-0.984977	-0.103118	0.0969187	-0.0022999	-0.905707	0.746547	0.163696	0.189997	-0.409313	0.7931	0.324325	0.166672	-1.49871	0.960788	0.3401	0.402478	0.183709	0.948201	-0.247151	-0.260109	-0.65579	0.10108	-0.681828	-0.674905	-1.16291	-0.161907	0.443279	0.370881	-0.206543	0.665831	-0.797776	-0.81306	-1.42222	-0.161276	-0.2185	-0.255827	-0.680003	0.129753	-0.0228354
12400	-0.519355	-0.510472	-0.95244	-0.0110055	0.00233391	-0.0153756	-0.363262	0.36551	-0.514724	-0.57738	-0.97826	-0.13867	0.0874217	-0.0147177	-0.904595	0.767837	0.174146	0.209341	-0.358354	0.818577	0.342628	0.166378	-1.58908	1.02127	0.380526	0.442362	0.238749	0.963323	-0.268576	-0.281195	-0.675014	0.0861577	-0.688729	-0.677896	-1.15936	-0.18061	0.451789	0.379357	-0.222011	0.670513	-0.80801	-0.819835	-1.41509	-0.216309	-0.245427	-0.284517	-0.715438	0.0953027	0.019265
12440	-0.518402	-0.51002	-0.95062	-0.0154914	-0.0192924	-0.0373593	-0.392527	0.348438	-0.539318	-0.595047	-0.974678	-0.183239	0.0732612	-0.0302286	-0.913966	0.768437	0.187635	0.227421	-0.310798	0.861559	0.358359	0.162792	-1.71441	1.07943	0.421693	0.48306	0.266475	0.988404	-0.288933	-0.300786	-0.693732	0.0821068	-0.693484	-0.679715	-1.15218	-0.2007	0.460029	0.387166	-0.227059	0.668644	-0.818376	-0.826738	-1.41526	-0.272853	-0.269562	-0.312299	-0.743485	0.0558175	0.0618168
12480	-0.51587	-0.508849	-0.948699	-0.0146571	-0.0425111	-0.060564	-0.418887	0.310914	-0.563718	-0.6132	-0.969483	-0.227751	0.0547508	-0.0490514	-0.927023	0.759048	0.204672	0.243455	-0.267949	0.948618	0.372013	0.155485	-1.86034	1.12311	0.463322	0.52447	0.295957	1.00512	-0.308122	-0.318543	-0.713613	0.0715828	-0.69584	-0.68038	-1.14738	-0.220942	0.467491	0.394338	-0.244398	0.665494	-0.828611	-0.833878	-1.38831	-0.331109	-0.290895	-0.337515	-0.75804	0.0224504	0.104787
12520	-0.511869	-0.507315	-0.95509	-0.0152711	-0.0671879	-0.0849218	-0.445158	0.280434	-0.587825	-0.63122	-0.965871	-0.259341	0.0322284	-0.0714118	-0.941087	0.767669	0.221206	0.255129	-0.239082	1.0004	0.384088	0.144578	-1.99367	1.14865	0.505111	0.566514	0.316306	1.04297	-0.326042	-0.3338	-0.728781	0.0633158	-0.695568	-0.67992	-1.14229	-0.240331	0.473617	0.401251	-0.261574	0.658151	-0.838454	-0.841581	-1.37793	-0.381694	-0.30942	-0.359417	-0.771708	-0.0124923	0.148144
12560	-0.506513	-0.505516	-0.96023	-0.0107379	-0.0931886	-0.110341	-0.470372	0.25463	-0.611538	-0.648819	-0.965626	-0.300275	0.0060319	-0.0970777	-0.945061	0.709823	0.230584	0.261398	-0.202789	1.04977	0.39508	0.130255	-2.0737	1.17256	0.546756	0.608938	0.33897	1.0771	-0.342593	-0.346215	-0.740663	0.0572508	-0.693105	-0.678386	-1.13655	-0.254524	0.47833	0.408099	-0.266035	0.646327	-0.847644	-0.849361	-1.3727	-0.437074	-0.325127	-0.377761	-0.792024	-0.0447171	0.191855
12600	-0.499911	-0.503562	-0.95623	-0.0101555	-0.120379	-0.136761	-0.486222	0.230251	-0.634757	-0.666008	-0.966432	-0.329727	-0.0235008	-0.12568	-0.950545	0.642546	0.233382	0.262658	-0.195477	1.07572	0.405486	0.11273	-2.08759	1.1826	0.587953	0.651185	0.358408	1.13035	-0.35686	-0.355562	-0.744195	0.0524777	-0.688898	-0.675836	-1.12802	-0.260154	0.481552	0.414657	-0.233496	0.631167	-0.855918	-0.856843	-1.36558	-0.466595	-0.338007	-0.39244	-0.804159	-0.0698142	0.235886
12640	-0.492181	-0.501424	-0.949848	-0.00740451	-0.148625	-0.164123	-0.506357	0.201216	-0.657384	-0.682803	-0.976173	-0.365618	-0.0560318	-0.156826	-0.960899	0.575428	0.230272	0.258984	-0.181617	1.0865	0.415802	0.092333	-2.09016	1.17862	0.6284	0.692759	0.383153	1.17918	-0.367439	-0.361951	-0.743592	0.0519988	-0.683216	-0.672363	-1.12542	-0.259976	0.483203	0.420576	-0.197042	0.622558	-0.863015	-0.863868	-1.3611	-0.499625	-0.348052	-0.403481	-0.818111	-0.0848234	0.280206
12680	-0.484163	-0.498944	-0.943592	-0.00693518	-0.177792	-0.192389	-0.530679	0.172374	-0.679316	-0.699235	-0.977446	-0.393315	-0.0912233	-0.190017	-0.975696	0.502576	0.221924	0.250428	-0.187256	1.0721	0.426525	0.0692254	-2.15999	1.16045	0.667793	0.73318	0.402424	1.19039	-0.374451	-0.36548	-0.753976	0.0514057	-0.676329	-0.668125	-1.12213	-0.261409	0.483205	0.425656	-0.159735	0.607139	-0.868673	-0.870184	-1.36041	-0.514051	-0.355253	-0.411005	-0.827736	-0.0938205	0.324782
12720	-0.476451	-0.495969	-0.942568	0.00574557	-0.207745	-0.221467	-0.546089	0.13698	-0.700455	-0.715348	-0.981031	-0.41316	-0.128737	-0.224821	-1.00412	0.481284	0.209006	0.237322	-0.196416	1.06366	0.436972	0.0433401	-2.1694	1.12793	0.705829	0.771879	0.426459	1.21286	-0.378043	-0.36632	-0.743926	0.0558211	-0.668506	-0.663346	-1.11605	-0.25105	0.48148	0.429675	-0.110394	0.600373	-0.872631	-0.875434	-1.36757	-0.523278	-0.359604	-0.415182	-0.8339	-0.104553	0.368356
12760	-0.469071	-0.492379	-0.935205	0.0119418	-0.238352	-0.25124	-0.56625	0.101739	-0.720787	-0.73118	-0.984403	-0.436765	-0.168236	-0.260681	-1.02982	0.441561	0.19219	0.22037	-0.203106	0.998169	0.437155	0.0145984	-2.214	1.08092	0.742205	0.808318	0.446494	1.232	-0.378365	-0.364632	-0.735654	0.057131	-0.660017	-0.658312	-1.10873	-0.250562	0.47795	0.432351	-0.058892	0.608399	-0.874627	-0.879261	-1.37223	-0.519358	-0.361735	-0.416206	-0.837086	-0.104609	0.40755
12800	-0.462046	-0.488028	-0.929823	0.0136622	-0.269485	-0.281642	-0.588876	0.0564788	-0.740888	-0.746787	-0.986013	-0.454247	-0.209381	-0.296832	-1.05175	0.365078	0.172146	0.200203	-0.211111	0.961176	0.42533	-0.0170192	-2.19486	1.02226	0.776618	0.842167	0.467806	1.24272	-0.375565	-0.360621	-0.721439	0.0626663	-0.65113	-0.653362	-1.1007	-0.236236	0.472535	0.433721	-0.00544098	0.620101	-0.874297	-0.881371	-1.36962	-0.502704	-0.362238	-0.414349	-0.838192	-0.0989998	0.442108
12840	-0.455404	-0.48279	-0.919555	0.0136614	-0.301365	-0.312619	-0.607424	0.0124652	-0.760788	-0.762239	-0.995854	-0.470227	-0.251835	-0.332693	-1.07106	0.323557	0.149544	0.177707	-0.226092	0.914594	0.402289	-0.0517963	-2.1879	0.954379	0.808764	0.873153	0.491259	1.25377	-0.369792	-0.354486	-0.706893	0.0705297	-0.642116	-0.648809	-1.09822	-0.239763	0.465157	0.43367	0.0498396	0.631055	-0.871085	-0.881458	-1.37548	-0.491974	-0.36124	-0.409875	-0.83168	-0.0955372	0.471964
12880	-0.449168	-0.476564	-0.908743	0.0203851	-0.333998	-0.344106	-0.631255	-0.0354588	-0.780371	-0.777608	-0.996205	-0.486569	-0.29526	-0.36793	-1.08145	0.268223	0.125054	0.15375	-0.236189	0.880651	0.368825	-0.0901759	-2.15986	0.88488	0.83834	0.901166	0.509038	1.2677	-0.361194	-0.346448	-0.702446	0.0819564	-0.633243	-0.644873	-1.10056	-0.241342	0.455739	0.431911	0.112004	0.643229	-0.86526	-0.879225	-1.37894	-0.478172	-0.358867	-0.403076	-0.822021	-0.0926828	0.49705
12920	-0.443364	-0.469657	-0.893647	0.028816	-0.367184	-0.375998	-0.653957	-0.0838742	-0.799524	-0.792957	-1.00812	-0.496237	-0.339318	-0.402226	-1.10904	0.227568	0.0993458	0.128986	-0.260295	0.844438	0.325729	-0.132431	-2.20228	0.798039	0.863986	0.926349	0.523723	1.30927	-0.349921	-0.336642	-0.687641	0.0942288	-0.62478	-0.64169	-1.10498	-0.229345	0.4442	0.427907	0.175986	0.645243	-0.857192	-0.874488	-1.38525	-0.464869	-0.355247	-0.394326	-0.809586	-0.092327	0.517297
12960	-0.438018	-0.462189	-0.88411	0.0328407	-0.400726	-0.408116	-0.668018	-0.128443	-0.818132	-0.808294	-1.02586	-0.518464	-0.382239	-0.434852	-1.11546	0.22458	0.0730901	0.103904	-0.287966	0.809221	0.273793	-0.178958	-2.17458	0.70126	0.885111	0.949089	0.54635	1.37065	-0.336121	-0.325051	-0.683522	0.106963	-0.616998	-0.639342	-1.11169	-0.211279	0.430464	0.421171	0.207044	0.654881	-0.847254	-0.867313	-1.38418	-0.449117	-0.350508	-0.384631	-0.795082	-0.0926341	0.53264
13000	-0.433154	-0.454441	-0.873974	0.0232614	-0.434424	-0.440275	-0.680291	-0.175932	-0.836079	-0.823246	-1.04494	-0.533215	-0.420485	-0.464678	-1.12538	0.205259	0.0469568	0.0781655	-0.31735	0.775371	0.213809	-0.229942	-2.12264	0.602963	0.902349	0.97018	0.565382	1.43631	-0.319943	-0.31169	-0.675942	0.130281	-0.610165	-0.637931	-1.12057	-0.176548	0.414451	0.41162	0.223969	0.655746	-0.835818	-0.858005	-1.38697	-0.427144	-0.344776	-0.374943	-0.794003	-0.0945884	0.54301
13040	-0.428798	-0.446793	-0.863243	0.0265558	-0.468081	-0.472352	-0.694775	-0.219343	-0.853252	-0.837394	-1.05815	-0.539844	-0.454142	-0.491304	-1.13338	0.188434	0.0216162	0.0512848	-0.346449	0.710616	0.14657	-0.285503	-2.11178	0.508498	0.916337	0.990291	0.575458	1.4937	-0.301535	-0.29652	-0.657221	0.153837	-0.604551	-0.637567	-1.12966	-0.156494	0.396092	0.399155	0.239688	0.655401	-0.823254	-0.847003	-1.38051	-0.407487	-0.33818	-0.365496	-0.783654	-0.0964992	0.548339
13080	-0.424975	-0.439515	-0.850755	0.0311864	-0.501498	-0.504199	-0.711567	-0.264849	-0.869536	-0.850767	-1.07713	-0.54604	-0.483459	-0.514507	-1.14273	0.200525	-0.0026478	0.0238117	-0.38247	0.689364	0.0728659	-0.345315	-2.11312	0.404115	0.927709	1.01003	0.592579	1.55002	-0.281046	-0.27959	-0.645928	0.182882	-0.600425	-0.638338	-1.13823	-0.138561	0.375516	0.384057	0.216382	0.642368	-0.809935	-0.834759	-1.38194	-0.389213	-0.330845	-0.356472	-0.770257	-0.0923846	0.548561
13120	-0.421711	-0.432922	-0.84096	0.0389077	-0.534475	-0.53566	-0.731118	-0.314592	-0.884816	-0.863415	-1.09451	-0.556227	-0.508688	-0.534207	-1.14828	0.209114	-0.027117	-0.00381852	-0.416494	0.660661	-0.00650982	-0.408529	-2.11067	0.293994	0.937101	1.02974	0.59728	1.62315	-0.258625	-0.260947	-0.626272	0.210416	-0.598284	-0.64031	-1.14648	-0.122275	0.353016	0.36677	0.175871	0.633956	-0.796232	-0.82182	-1.38362	-0.371264	-0.3229	-0.347898	-0.759959	-0.0888656	0.543607
13160	-0.41903	-0.427191	-0.827008	0.0343671	-0.566816	-0.56662	-0.76465	-0.357025	-0.898978	-0.875364	-1.11343	-0.562803	-0.530077	-0.550331	-1.15079	0.224051	-0.0516675	-0.0312263	-0.443144	0.635288	-0.0907657	-0.474463	-2.12206	0.184933	0.945148	1.04963	0.623612	1.71768	-0.234819	-0.240689	-0.608681	0.231378	-0.598582	-0.643515	-1.15352	-0.111132	0.328887	0.347683	0.128777	0.628293	-0.782517	-0.808705	-1.38557	-0.357468	-0.314472	-0.339826	-0.75409	-0.0909224	0.53341
13200	-0.416972	-0.422466	-0.817884	0.0278486	-0.59832	-0.596968	-0.785854	-0.398285	-0.911906	-0.886648	-1.12796	-0.577016	-0.547879	-0.562883	-1.15429	0.263072	-0.0759525	-0.0579094	-0.48071	0.615847	-0.17911	-0.542384	-2.15581	0.0846049	0.952486	1.06941	0.648058	1.76093	-0.210373	-0.218896	-0.595674	0.252758	-0.601216	-0.647966	-1.1583	-0.10863	0.303429	0.327215	0.0701508	0.62736	-0.769161	-0.795841	-1.38413	-0.341007	-0.305687	-0.332244	-0.751203	-0.0865368	0.517903
13240	-0.415907	-0.418876	-0.818186	0.0215622	-0.62879	-0.626562	-0.812662	-0.442353	-0.923487	-0.897309	-1.13859	-0.585243	-0.562344	-0.572077	-1.16395	0.283925	-0.0996249	-0.0830199	-0.506207	0.614343	-0.27075	-0.61149	-2.14453	-0.00995827	0.95975	1.08876	0.664357	1.81346	-0.185378	-0.195647	-0.577999	0.270037	-0.60607	-0.653673	-1.16256	-0.117103	0.276939	0.305732	0.0148774	0.628722	-0.756536	-0.783612	-1.3837	-0.323871	-0.296674	-0.325109	-0.749515	-0.0785413	0.497018
13280	-0.41589	-0.416533	-0.816544	0.0142274	-0.658028	-0.65525	-0.836128	-0.480755	-0.933605	-0.907344	-1.14837	-0.601995	-0.573721	-0.5781	-1.17009	0.320277	-0.122338	-0.105822	-0.523236	0.58622	-0.364895	-0.681117	-2.12382	-0.107758	0.967576	1.10726	0.679691	1.86391	-0.159917	-0.171009	-0.564083	0.288601	-0.61303	-0.660567	-1.17387	-0.118709	0.249714	0.283579	-0.0508645	0.635908	-0.745014	-0.772327	-1.37967	-0.292658	-0.287856	-0.318441	-0.749786	-0.0778264	0.470688
13320	-0.416781	-0.415545	-0.809072	0.00600739	-0.685834	-0.68287	-0.856228	-0.5201	-0.942445	-0.916781	-1.16275	-0.613368	-0.582261	-0.581056	-1.17419	0.344428	-0.143744	-0.125635	-0.527668	0.571623	-0.460229	-0.750568	-2.11067	-0.209209	0.976599	1.12354	0.68481	1.90154	-0.134073	-0.145044	-0.53618	0.305268	-0.621982	-0.668547	-1.17862	-0.125916	0.222051	0.261303	-0.108821	0.653009	-0.734967	-0.762142	-1.3763	-0.281184	-0.280268	-0.312261	-0.746989	-0.0812739	0.439136
13360	-0.418444	-0.415994	-0.80245	-0.0105643	-0.712061	-0.709268	-0.877927	-0.556057	-0.950632	-0.925649	-1.17344	-0.625523	-0.588215	-0.581245	-1.17886	0.360912	-0.163497	-0.141981	-0.529239	0.554887	-0.555324	-0.818985	-2.11067	-0.307846	0.987455	1.13603	0.684439	1.9195	-0.107929	-0.11782	-0.506169	0.324581	-0.632811	-0.677454	-1.18318	-0.141886	0.194249	0.239438	-0.176133	0.665269	-0.726765	-0.753063	-1.37277	-0.265647	-0.274036	-0.306561	-0.737876	-0.0707286	0.407042
13400	-0.42074	-0.417734	-0.803547	-0.0126373	-0.73689	-0.734305	-0.899668	-0.591337	-0.958104	-0.933931	-1.1803	-0.632066	-0.591833	-0.578814	-1.18205	0.380765	-0.181249	-0.154563	-0.530588	0.53211	-0.649376	-0.885638	-2.11067	-0.410815	1.00078	1.14394	0.676179	1.94919	-0.0815684	-0.0895148	-0.473577	0.344167	-0.645403	-0.687084	-1.18748	-0.160016	0.166605	0.218115	-0.240772	0.681503	-0.718951	-0.744613	-1.37783	-0.242251	-0.269215	-0.301375	-0.72563	-0.0644629	0.376167
13440	-0.42353	-0.420655	-0.804289	-0.0231786	-0.760341	-0.757969	-0.919272	-0.619312	-0.964765	-0.941588	-1.18656	-0.641763	-0.593365	-0.574015	-1.17871	0.38926	-0.196653	-0.163285	-0.537923	0.499432	-0.741578	-0.950056	-2.11067	-0.516346	1.01678	1.14638	0.648374	1.97211	-0.0550743	-0.0605633	-0.437761	0.362068	-0.659644	-0.697419	-1.18821	-0.181381	0.139416	0.197212	-0.304756	0.690647	-0.708779	-0.736425	-1.37564	-0.224776	-0.265856	-0.297347	-0.709535	-0.0589464	0.346658
13480	-0.426677	-0.424615	-0.803219	-0.0365947	-0.782391	-0.780302	-0.945905	-0.648182	-0.970518	-0.948525	-1.1911	-0.650485	-0.593062	-0.56723	-1.17453	0.408757	-0.209363	-0.16855	-0.547844	0.468763	-0.831126	-1.01185	-2.08099	-0.61295	1.03481	1.14294	0.628645	1.85164	-0.0285298	-0.0313288	-0.417084	0.375738	-0.675419	-0.708567	-1.18786	-0.196704	0.11298	0.176822	-0.340322	0.703472	-0.696501	-0.727096	-1.38977	-0.208034	-0.264014	-0.29538	-0.702513	-0.058405	0.318659
13520	-0.430042	-0.429203	-0.81154	-0.053918	-0.803017	-0.801217	-0.966699	-0.670687	-0.975268	-0.954642	-1.19999	-0.659023	-0.590528	-0.558687	-1.17788	0.425183	-0.219031	-0.171419	-0.566216	0.447191	-0.917214	-1.07063	-2.05148	-0.71193	1.05412	1.13327	0.618027	1.74909	-0.00201782	-0.00249394	-0.39583	0.403858	-0.692613	-0.720639	-1.19001	-0.219662	0.087594	0.156686	-0.397283	0.716139	-0.682417	-0.715868	-1.39339	-0.188551	-0.263743	-0.295531	-0.705296	-0.0631807	0.292315
13560	-0.433488	-0.434108	-0.818583	-0.0618865	-0.822197	-0.820641	-0.979384	-0.693041	-0.97892	-0.959811	-1.20223	-0.668924	-0.58363	-0.548576	-1.1815	0.444015	-0.225311	-0.172153	-0.573255	0.434977	-0.999039	-1.12592	-2.08511	-0.7405	1.07396	1.11805	0.585437	1.65035	0.0243785	0.0255229	-0.381118	0.420444	-0.711113	-0.733762	-1.19655	-0.245275	0.0635563	0.136477	-0.446382	0.719955	-0.666827	-0.702394	-1.3858	-0.163401	-0.265096	-0.29777	-0.685497	-0.0557103	0.267771
13600	-0.436875	-0.439001	-0.827498	-0.069259	-0.839908	-0.838525	-0.996232	-0.700671	-0.981375	-0.9639	-1.2045	-0.681507	-0.572505	-0.537025	-1.19112	0.473028	-0.227855	-0.171107	-0.586352	0.439095	-1.07579	-1.17735	-2.09172	-0.7405	1.09358	1.09825	0.544216	1.549	0.050576	0.0524292	-0.363828	0.442754	-0.730804	-0.748025	-1.19756	-0.275995	0.0411329	0.115817	-0.481359	0.717449	-0.650033	-0.686576	-1.38008	-0.136953	-0.268126	-0.301986	-0.667442	-0.0522807	0.245172
13640	-0.440066	-0.443756	-0.836311	-0.0773841	-0.856126	-0.854819	-1.01588	-0.70661	-0.98254	-0.966793	-1.2073	-0.693414	-0.557526	-0.524058	-1.19811	0.491847	-0.226446	-0.168721	-0.598251	0.426231	-1.14668	-1.22458	-2.11	-0.7405	1.11224	1.07533	0.49481	1.43333	0.0764916	0.0781438	-0.342332	0.460808	-0.751572	-0.763452	-1.20107	-0.312748	0.0199871	0.0943129	-0.539991	0.707429	-0.632335	-0.668454	-1.37296	-0.113674	-0.272887	-0.307969	-0.663996	-0.0529494	0.224664
13680	-0.442923	-0.448235	-0.835687	-0.0933383	-0.870829	-0.869477	-1.02952	-0.709286	-0.982318	-0.968374	-1.20769	-0.707018	-0.539064	-0.509578	-1.20861	0.506251	-0.223644	-0.165829	-0.596584	0.411176	-1.21088	-1.26749	-2.11059	-0.7405	1.12917	1.05021	0.432784	1.30961	0.102042	0.102587	-0.324972	0.471447	-0.773142	-0.780054	-1.20535	-0.351685	-0.000192498	0.0714608	-0.589624	0.691095	-0.614032	-0.64831	-1.36508	-0.0844726	-0.279432	-0.315494	-0.661644	-0.0437774	0.206392
13720	-0.445307	-0.452307	-0.851791	-0.106391	-0.883995	-0.882468	-1.04504	-0.715816	-0.980614	-0.968593	-1.20692	-0.709523	-0.517492	-0.493703	-1.21486	0.525269	-0.220528	-0.162989	-0.602949	0.390412	-1.2676	-1.30613	-2.11067	-0.7405	1.14364	1.02404	0.308624	1.25279	0.126805	0.125691	-0.308656	0.491282	-0.794169	-0.797811	-1.20887	-0.396665	-0.0195814	0.0468383	-0.640734	0.668043	-0.595426	-0.626694	-1.35686	-0.0569723	-0.287816	-0.324281	-0.681649	-0.0305882	0.1905
13760	-0.447105	-0.455883	-0.865434	-0.118567	-0.895599	-0.893787	-1.0579	-0.718953	-0.97733	-0.967484	-1.20346	-0.702773	-0.493182	-0.476525	-1.22221	0.54406	-0.217045	-0.160318	-0.605555	0.379594	-1.31603	-1.34033	-2.11067	-0.7405	1.15489	0.997441	0.189569	1.24304	0.15022	0.147391	-0.29491	0.511294	-0.814312	-0.816498	-1.21176	-0.440121	-0.0383551	0.0203216	-0.68724	0.63578	-0.576817	-0.604498	-1.35694	-0.0215594	-0.298091	-0.334005	-0.711432	-0.0126221	0.177135
13800	-0.448523	-0.458893	-0.86815	-0.126471	-0.90562	-0.903443	-1.07387	-0.716057	-0.972372	-0.965109	-1.19919	-0.698101	-0.466506	-0.458077	-1.22771	0.574847	-0.213142	-0.157778	-0.60608	0.364968	-1.35536	-1.3698	-2.11067	-0.738812	1.16217	0.971052	-0.00898564	1.2373	0.172217	0.167635	-0.282367	0.536842	-0.833501	-0.835564	-1.2194	-0.49002	-0.0566891	-0.00814084	-0.746982	0.610774	-0.558506	-0.582242	-1.362	0.0129326	-0.31012	-0.344343	-0.728829	0.00348533	0.16644
13840	-0.449692	-0.461305	-0.87205	-0.127734	-0.914034	-0.911428	-1.08596	-0.714952	-0.965646	-0.961544	-1.19183	-0.696683	-0.437835	-0.43873	-1.23968	0.600236	-0.208768	-0.155098	-0.607246	0.359688	-1.3848	-1.39426	-2.11067	-0.716155	1.16473	0.943893	-0.242144	1.23521	0.192726	0.186384	-0.273669	0.57189	-0.851661	-0.854341	-1.21924	-0.534796	-0.0747587	-0.0386596	-0.802271	0.594586	-0.540792	-0.560524	-1.36411	0.0368635	-0.320599	-0.355042	-0.762945	0.0228022	0.158561
13880	-0.450681	-0.463186	-0.878643	-0.127896	-0.920819	-0.917722	-1.09688	-0.713433	-0.957948	-0.956817	-1.18327	-0.689185	-0.407543	-0.418839	-1.25116	0.620867	-0.203869	-0.152221	-0.609551	0.35633	-1.40367	-1.41349	-2.11067	-0.670849	1.16182	0.915617	-0.496513	1.23248	0.211681	0.203592	-0.258933	0.589741	-0.868721	-0.871689	-1.21603	-0.579991	-0.0927396	-0.0712684	-0.852765	0.586226	-0.523977	-0.540368	-1.36184	0.0582345	-0.328436	-0.365781	-0.791047	0.0470453	0.153643
13920	-0.451559	-0.464602	-0.884885	-0.126084	-0.926153	-0.922327	-1.10408	-0.711964	-0.949911	-0.950945	-1.17381	-0.686946	-0.376002	-0.398677	-1.26444	0.649615	-0.198392	-0.149147	-0.610342	0.358087	-1.41255	-1.42746	-2.11067	-0.607709	1.15343	0.886856	-0.754167	1.23002	0.229013	0.219174	-0.249411	0.615745	-0.884608	-0.887244	-1.21683	-0.618176	-0.110807	-0.105776	-0.865934	0.572031	-0.508361	-0.522638	-1.35428	0.074507	-0.333792	-0.375612	-0.834878	0.0771039	0.151831
13960	-0.452395	-0.465606	-0.889857	-0.129789	-0.930411	-0.925348	-1.10769	-0.710068	-0.941482	-0.94406	-1.16506	-0.670772	-0.343583	-0.378466	-1.27912	0.699793	-0.192285	-0.145842	-0.621876	0.361121	-1.41222	-1.43634	-2.11067	-0.531551	1.14268	0.857449	-0.998941	1.22815	0.244653	0.233062	-0.242527	0.634237	-0.899249	-0.901022	-1.21137	-0.642601	-0.129137	-0.1413	-0.855891	0.553781	-0.494297	-0.507963	-1.34085	0.0930853	-0.336831	-0.382941	-0.879632	0.105386	0.151977
14000	-0.453256	-0.46648	-0.89414	-0.133769	-0.933613	-0.926844	-1.11385	-0.714502	-0.932605	-0.936445	-1.15117	-0.658344	-0.310659	-0.358655	-1.30058	0.745085	-0.185495	-0.142233	-0.624275	0.36415	-1.40337	-1.44036	-2.11067	-0.447191	1.13021	0.828091	-1.23579	1.22687	0.258535	0.245222	-0.229049	0.651317	-0.912573	-0.913113	-1.20438	-0.660329	-0.147904	-0.173966	-0.894354	0.522344	-0.483872	-0.496726	-1.32782	0.106831	-0.337716	-0.387368	-0.917544	0.130392	0.152035
14040	-0.454211	-0.467438	-0.894425	-0.133728	-0.935774	-0.926879	-1.11509	-0.710844	-0.923226	-0.928232	-1.1433	-0.646845	-0.277602	-0.339513	-1.31029	0.794352	-0.17797	-0.138296	-0.626609	0.373083	-1.3867	-1.43971	-2.11067	-0.359445	1.11626	0.799814	-1.43123	1.22308	0.270589	0.255616	-0.226602	0.667526	-0.924505	-0.923623	-1.19521	-0.673642	-0.167284	-0.201628	-0.903086	0.507061	-0.47783	-0.488982	-1.3176	0.124225	-0.336609	-0.388837	-0.948502	0.153604	0.151899
14080	-0.455329	-0.468703	-0.894001	-0.126205	-0.936903	-0.92557	-1.11442	-0.704085	-0.913291	-0.919456	-1.13842	-0.639921	-0.245112	-0.321086	-1.30737	0.839335	-0.169656	-0.134002	-0.62916	0.384431	-1.36294	-1.4345	-2.11067	-0.273128	1.10107	0.773982	-1.54341	1.22178	0.280747	0.264236	-0.222013	0.679187	-0.934975	-0.932591	-1.18921	-0.687606	-0.187453	-0.224187	-0.899563	0.493922	-0.475871	-0.484767	-1.30969	0.130954	-0.333674	-0.387446	-0.978623	0.171281	0.151489
14120	-0.456678	-0.470349	-0.899799	-0.119176	-0.937015	-0.923128	-1.11222	-0.700631	-0.902746	-0.91011	-1.13048	-0.634136	-0.215374	-0.303332	-1.31569	0.888989	-0.160502	-0.12929	-0.629236	0.390762	-1.33276	-1.4246	-2.11067	-0.193057	1.08489	0.751541	-1.55315	1.21971	0.288942	0.271098	-0.219492	0.687017	-0.943909	-0.939971	-1.18202	-0.700316	-0.208586	-0.241782	-0.870717	0.48248	-0.477695	-0.484028	-1.30528	0.138967	-0.329073	-0.383378	-1.00368	0.194285	0.150726
14160	-0.458326	-0.472438	-0.899109	-0.113458	-0.936121	-0.919815	-1.11182	-0.694768	-0.891535	-0.900124	-1.1281	-0.617095	-0.188692	-0.286436	-1.31632	0.919265	-0.150453	-0.124072	-0.63295	0.396297	-1.29688	-1.41014	-2.11067	-0.124047	1.06794	0.73311	-1.45516	1.21801	0.295106	0.27622	-0.213686	0.699607	-0.951234	-0.945726	-1.18219	-0.699021	-0.230858	-0.254354	-0.85715	0.473574	-0.483001	-0.486652	-1.29252	0.146727	-0.322968	-0.376926	-1.01392	0.224256	0.14953
14200	-0.460343	-0.475046	-0.896809	-0.110046	-0.934235	-0.91579	-1.11082	-0.688815	-0.879605	-0.889482	-1.13084	-0.606894	-0.165024	-0.270399	-1.32511	0.944236	-0.139459	-0.118259	-0.629948	0.399661	-1.25601	-1.39155	-2.11067	-0.0709155	1.05048	0.719089	-1.3447	1.21602	0.29917	0.279648	-0.213289	0.712358	-0.956879	-0.94989	-1.17936	-0.704862	-0.250902	-0.261833	-0.859819	0.465042	-0.49149	-0.492462	-1.2949	0.149658	-0.315523	-0.368299	-1.02872	0.258228	0.147821
14240	-0.462795	-0.478254	-0.898582	-0.103055	-0.931367	-0.911217	-1.10792	-0.680849	-0.866901	-0.878188	-1.12383	-0.596593	-0.144329	-0.255277	-1.32781	0.972308	-0.127978	-0.111804	-0.633481	0.40306	-1.21083	-1.36909	-2.11067	-0.038477	1.03273	0.709703	-1.19546	1.21399	0.301066	0.281434	-0.209547	0.714795	-0.960769	-0.952456	-1.17798	-0.712457	-0.264583	-0.264291	-0.847692	0.466434	-0.502862	-0.500985	-1.28072	0.149372	-0.306901	-0.357745	-1.04014	0.291953	0.14552
14280	-0.465753	-0.482093	-0.912856	-0.0984893	-0.927531	-0.90618	-1.10277	-0.672235	-0.853369	-0.866344	-1.11519	-0.589866	-0.126564	-0.241188	-1.32084	1.0009	-0.116637	-0.104671	-0.632558	0.414374	-1.16206	-1.34291	-2.11061	-0.0306252	1.01493	0.704414	-1.08212	1.21184	0.300803	0.281646	-0.209319	0.718135	-0.962371	-0.953296	-1.17772	-0.71379	-0.272371	-0.261868	-0.838142	0.466468	-0.516817	-0.511935	-1.26691	0.141497	-0.297264	-0.34567	-1.05041	0.325652	0.142546
14320	-0.469396	-0.486595	-0.918197	-0.0975804	-0.922738	-0.900736	-1.09749	-0.662984	-0.838953	-0.854049	-1.10663	-0.576995	-0.111687	-0.228411	-1.31081	1.02058	-0.105428	-0.0968578	-0.626414	0.425631	-1.11039	-1.31238	-2.11054	-0.0306252	0.997332	0.702439	-0.963387	1.21009	0.298543	0.280366	-0.206818	0.72783	-0.961347	-0.952405	-1.17743	-0.707384	-0.274749	-0.254918	-0.817419	0.461134	-0.533054	-0.525021	-1.25461	0.132648	-0.286775	-0.332489	-1.05703	0.359264	0.138819
14360	-0.474408	-0.491925	-0.925754	-0.101205	-0.917002	-0.894946	-1.08961	-0.652263	-0.8236	-0.841389	-1.10332	-0.567306	-0.0996573	-0.217169	-1.3053	1.03345	-0.0943422	-0.0884111	-0.614659	0.429647	-1.05654	-1.27792	-2.11032	-0.0424573	0.980165	0.70326	-0.833174	1.20857	0.294426	0.277665	-0.206241	0.731923	-0.957842	-0.949734	-1.17569	-0.69516	-0.272203	-0.243968	-0.799188	0.455472	-0.551275	-0.539723	-1.26252	0.126229	-0.276742	-0.318703	-1.06086	0.39275	0.134261
14400	-0.480824	-0.498281	-0.941535	-0.0945457	-0.910335	-0.889188	-1.08413	-0.638047	-0.807512	-0.828428	-1.09518	-0.555139	-0.0904321	-0.207688	-1.32849	1.04008	-0.0833694	-0.07942	-0.60341	0.430323	-1.00119	-1.24031	-2.11001	-0.056324	0.963669	0.706486	-0.719767	1.20694	0.288593	0.273598	-0.206027	0.730577	-0.951995	-0.945192	-1.1758	-0.685987	-0.265217	-0.229735	-0.77536	0.487627	-0.571178	-0.55574	-1.25477	0.103778	-0.268783	-0.305269	-1.06796	0.423992	0.128791
14440	-0.488558	-0.505632	-0.955125	-0.0888419	-0.902791	-0.884538	-1.08431	-0.630581	-0.793301	-0.815366	-1.08228	-0.541748	-0.0839698	-0.200206	-1.34095	1.03312	-0.0725005	-0.0699942	-0.5803	0.426371	-0.945066	-1.20024	-2.11012	-0.0682729	0.947604	0.711613	-0.611911	1.20573	0.281182	0.268236	-0.210246	0.725827	-0.94395	-0.938759	-1.1757	-0.667959	-0.254276	-0.21277	-0.740662	0.463322	-0.592465	-0.57263	-1.26208	0.094491	-0.262632	-0.293306	-1.06729	0.443587	0.122329
14480	-0.497527	-0.513954	-0.96659	-0.0919859	-0.896553	-0.881279	-1.07738	-0.619168	-0.781578	-0.80311	-1.06398	-0.531702	-0.0802284	-0.194856	-1.33759	1.02805	-0.061726	-0.0602876	-0.557433	0.428719	-0.890368	-1.15849	-2.1101	-0.0788867	0.931359	0.718274	-0.504007	1.2047	0.272336	0.261768	-0.221653	0.723387	-0.933848	-0.930468	-1.17372	-0.659425	-0.239865	-0.194679	-0.715954	0.459619	-0.614834	-0.589449	-1.27681	0.0695401	-0.258002	-0.283238	-1.0613	0.458796	0.114796
14520	-0.507646	-0.523195	-0.978177	-0.0899065	-0.892716	-0.87936	-1.07471	-0.613568	-0.772236	-0.792387	-1.04873	-0.518861	-0.0791662	-0.192098	-1.33748	1.03064	-0.0510364	-0.0504877	-0.537148	0.421695	-0.838754	-1.11573	-2.10985	-0.0887481	0.915234	0.726008	-0.401188	1.2057	0.262194	0.254388	-0.225376	0.719849	-0.921832	-0.920408	-1.17606	-0.651096	-0.22247	-0.17758	-0.676238	0.425424	-0.637987	-0.606027	-1.29106	0.0387749	-0.254606	-0.275004	-1.04431	0.471282	0.106112
14560	-0.51883	-0.533191	-0.992531	-0.0922591	-0.891112	-0.878785	-1.0734	-0.610116	-0.76517	-0.783177	-1.03744	-0.51654	-0.0807413	-0.192275	-1.34965	1.02135	-0.0404221	-0.0407276	-0.51213	0.413467	-0.790493	-1.07239	-2.11001	-0.0984397	0.899551	0.734606	-0.310299	1.20579	0.250896	0.246241	-0.235032	0.720461	-0.908043	-0.908612	-1.17872	-0.631516	-0.202573	-0.162447	-0.653508	0.420291	-0.661379	-0.622502	-1.3031	0.029976	-0.252159	-0.26843	-1.03925	0.492552	0.0967045
14600	-0.530994	-0.543816	-1.012	-0.0917543	-0.891572	-0.879576	-1.07323	-0.610637	-0.760274	-0.775564	-1.03296	-0.515793	-0.0849118	-0.195605	-1.3699	0.980332	-0.0298738	-0.0311594	-0.488778	0.404996	-0.745852	-1.02885	-2.11067	-0.108544	0.884631	0.743937	-0.221958	1.20602	0.238583	0.237405	-0.248864	0.718472	-0.892624	-0.895081	-1.18378	-0.612451	-0.180661	-0.149709	-0.631667	0.408874	-0.683456	-0.639093	-1.30375	0.0191177	-0.250374	-0.263231	-1.05136	0.505173	0.0901261
14640	-0.544054	-0.554988	-1.02759	-0.0928985	-0.893927	-0.881773	-1.07527	-0.613488	-0.757442	-0.7698	-1.02606	-0.513654	-0.0914533	-0.201854	-1.38959	0.937355	-0.0193819	-0.0218101	-0.471247	0.394499	-0.7051	-0.985591	-2.11067	-0.053732	0.870796	0.753714	-0.14103	1.20754	0.225394	0.22796	-0.255659	0.710061	-0.875715	-0.879884	-1.17677	-0.598958	-0.157218	-0.139356	-0.620538	0.378689	-0.703997	-0.655988	-1.30527	0.00707921	-0.248964	-0.259044	-1.06249	0.526129	0.0868647
14680	-0.557926	-0.56655	-1.04751	-0.0965484	-0.89801	-0.885313	-1.07185	-0.609549	-0.756568	-0.765953	-1.0221	-0.508179	-0.0984786	-0.210966	-1.40841	0.899646	-0.00893697	-0.0127762	-0.45077	0.376679	-0.668505	-0.943465	-2.11067	-0.0306252	0.858368	0.763763	-0.0730061	1.20982	0.211472	0.217966	-0.256358	0.700055	-0.857461	-0.863094	-1.17756	-0.579846	-0.13273	-0.13135	-0.604012	0.35395	-0.72301	-0.673311	-1.30715	0.00441241	-0.247645	-0.255422	-1.06515	0.53087	0.0866604
14720	-0.572525	-0.578335	-1.06377	-0.101304	-0.90365	-0.890064	-1.07646	-0.613659	-0.757546	-0.764116	-1.01937	-0.508914	-0.10562	-0.223183	-1.40962	0.857005	0.00147051	-0.00417079	-0.423266	0.36704	-0.636335	-0.903171	-2.11067	-0.0306252	0.847668	0.773854	-0.0151522	1.2126	0.196955	0.207454	-0.261882	0.683602	-0.838001	-0.844699	-1.17711	-0.555866	-0.107679	-0.125909	-0.591647	0.337122	-0.740502	-0.690845	-1.3126	-0.0164091	-0.246128	-0.251875	-1.05434	0.550321	0.0892532
14760	-0.587765	-0.590263	-1.08111	-0.108593	-0.910679	-0.895893	-1.08537	-0.617441	-0.76027	-0.764403	-1.01915	-0.514738	-0.113029	-0.238422	-1.44233	0.799608	0.01185	0.00391234	-0.400013	0.364628	-0.608858	-0.865001	-2.11068	-0.0306252	0.839017	0.783964	0.0380237	1.21563	0.181983	0.196435	-0.274801	0.666181	-0.817479	-0.824677	-1.1682	-0.528703	-0.0842734	-0.123254	-0.57407	0.316989	-0.756479	-0.708557	-1.31767	-0.0118755	-0.244129	-0.247903	-1.05414	0.583108	0.094383
14800	-0.603564	-0.602257	-1.09278	-0.110878	-0.918929	-0.902666	-1.09081	-0.610389	-0.764634	-0.766904	-1.02519	-0.528051	-0.120856	-0.256499	-1.46618	0.737507	0.0219434	0.0112833	-0.365355	0.348305	-0.586341	-0.8275	-2.1114	0.0805104	0.832738	0.793984	0.0796721	1.21886	0.166698	0.184918	-0.283076	0.648845	-0.796036	-0.803234	-1.16637	-0.501241	-0.0701164	-0.123666	-0.55811	0.301508	-0.770947	-0.726357	-1.32527	-0.00441174	-0.241361	-0.243042	-1.04927	0.594931	0.10179
14840	-0.619835	-0.614037	-1.11173	-0.119492	-0.92823	-0.910251	-1.09526	-0.616346	-0.770533	-0.771513	-1.02433	-0.54008	-0.129255	-0.277856	-1.51075	0.674652	0.0307129	0.0177586	-0.349217	0.338273	-0.569054	-0.791186	-2.11248	0.152122	0.829152	0.803758	0.127027	1.2219	0.151773	0.17292	-0.294467	0.630834	-0.77391	-0.780726	-1.16426	-0.476809	-0.0653486	-0.127446	-0.546863	0.295574	-0.783915	-0.743915	-1.33591	0.00469588	-0.237538	-0.236883	-1.03012	0.611081	0.111214
14880	-0.635817	-0.625136	-1.14012	-0.123815	-0.938414	-0.9185	-1.10332	-0.617067	-0.77786	-0.778064	-1.0237	-0.561812	-0.138376	-0.302707	-1.54431	0.616944	0.0379802	0.0231946	-0.335128	0.328554	-0.557263	-0.757034	-2.13222	0.326794	0.82858	0.81318	0.162868	1.22744	0.137863	0.160534	-0.305455	0.615881	-0.751594	-0.757494	-1.15793	-0.448811	-0.0691557	-0.134925	-0.535882	0.280664	-0.795388	-0.760938	-1.34104	0.0163461	-0.232425	-0.229148	-1.01306	0.607815	0.122395
14920	-0.649089	-0.635491	-1.15694	-0.126934	-0.949312	-0.927179	-1.10612	-0.616182	-0.78651	-0.786376	-1.02888	-0.586427	-0.148371	-0.329797	-1.55597	0.555541	0.0436611	0.0274661	-0.324866	0.326164	-0.551237	-0.72527	-2.15992	0.459401	0.831325	0.822041	0.199949	1.24331	0.124979	0.147926	-0.310692	0.611937	-0.729248	-0.73383	-1.15078	-0.422447	-0.0807231	-0.146533	-0.532856	0.256456	-0.805374	-0.777303	-1.34253	0.0245801	-0.226268	-0.220154	-0.988964	0.607171	0.135073
14960	-0.659522	-0.644829	-1.16787	-0.13209	-0.960755	-0.936151	-1.11374	-0.63016	-0.796077	-0.796108	-1.022	-0.611308	-0.159392	-0.355708	-1.59846	0.492583	0.0476715	0.0305433	-0.31604	0.328144	-0.551245	-0.696572	-2.19195	0.683588	0.835068	0.829975	0.23582	1.28897	0.113128	0.135277	-0.317933	0.599405	-0.707	-0.710022	-1.14641	-0.394067	-0.0992366	-0.162425	-0.531647	0.20814	-0.813879	-0.79239	-1.35557	0.0231122	-0.219394	-0.210516	-0.964074	0.618424	0.148988
15000	-0.667205	-0.652405	-1.17784	-0.144967	-0.97253	-0.945367	-1.12278	-0.646227	-0.80562	-0.806651	-1.02222	-0.627313	-0.17159	-0.379731	-1.62408	0.43903	0.0499271	0.0324322	-0.305854	0.331088	-0.557553	-0.672192	-2.22769	0.677912	0.838074	0.836699	0.264739	1.33404	0.10232	0.122998	-0.316931	0.590962	-0.684976	-0.68637	-1.14261	-0.362129	-0.123881	-0.182269	-0.537052	0.150289	-0.82091	-0.805875	-1.35809	0.0201963	-0.212102	-0.200646	-0.937084	0.62982	0.16388
15040	-0.672229	-0.657953	-1.17888	-0.138362	-0.984209	-0.954765	-1.13299	-0.654259	-0.815112	-0.817839	-1.03088	-0.64229	-0.185117	-0.401889	-1.66506	0.390559	0.0503438	0.0330225	-0.304316	0.351218	-0.568751	-0.65332	-2.25196	0.565712	0.840382	0.842271	0.285608	1.37132	0.0925606	0.111353	-0.319328	0.575306	-0.663304	-0.663168	-1.13792	-0.327496	-0.153843	-0.205506	-0.546764	0.0953539	-0.826474	-0.81765	-1.36264	0.0428201	-0.204691	-0.191042	-0.91385	0.635941	0.179489
15080	-0.674681	-0.661344	-1.18346	-0.137871	-0.995645	-0.964288	-1.14121	-0.659762	-0.824588	-0.829532	-1.03699	-0.657246	-0.200125	-0.421858	-1.68698	0.339225	0.0488374	0.0322059	-0.308665	0.36448	-0.578029	-0.641046	-2.27574	0.449395	0.84203	0.846706	0.305918	1.38932	0.0838599	0.100497	-0.332605	0.561588	-0.64211	-0.640697	-1.12901	-0.282495	-0.188308	-0.231872	-0.554642	0.0560954	-0.830578	-0.827694	-1.36572	0.0448595	-0.197461	-0.182113	-0.896106	0.645835	0.195555
15120	-0.67465	-0.662722	-1.18714	-0.128849	-1.00674	-0.973843	-1.14919	-0.664545	-0.834083	-0.841458	-1.05331	-0.681598	-0.216764	-0.439435	-1.69355	0.285205	0.0453238	0.029974	-0.309859	0.377364	-0.584833	-0.637144	-2.28683	0.329498	0.843057	0.850053	0.322242	1.40718	0.0762258	0.0905356	-0.338322	0.540767	-0.62152	-0.619198	-1.11989	-0.241323	-0.226461	-0.261051	-0.568851	0.0059537	-0.833228	-0.836082	-1.36815	0.0386279	-0.190711	-0.174272	-0.87012	0.658472	0.211819
15160	-0.672227	-0.661904	-1.18633	-0.120179	-1.01741	-0.983312	-1.15448	-0.67299	-0.843634	-0.853369	-1.06366	-0.693683	-0.235188	-0.454856	-1.69536	0.238079	0.0397188	0.0264637	-0.313337	0.40774	-0.58939	-0.643564	-2.27905	0.209461	0.843504	0.852174	0.337323	1.39998	0.0696664	0.0815458	-0.346466	0.524648	-0.601662	-0.59883	-1.11115	-0.192504	-0.267487	-0.292578	-0.574704	0.00194685	-0.835007	-0.842957	-1.38076	0.0540893	-0.184739	-0.167845	-0.85593	0.664989	0.228019
15200	-0.667499	-0.65888	-1.1828	-0.112196	-1.02754	-0.992569	-1.17003	-0.671407	-0.853277	-0.865153	-1.07574	-0.703463	-0.255456	-0.468336	-1.70077	0.188852	0.0319382	0.021687	-0.324414	0.439297	-0.591932	-0.66252	-2.29011	0.0894194	0.843408	0.853013	0.350616	1.35674	0.0641901	0.0736046	-0.350991	0.524451	-0.582662	-0.579697	-1.10279	-0.156177	-0.310573	-0.325996	-0.57757	-0.000648725	-0.836948	-0.84858	-1.4021	0.0754604	-0.179847	-0.163166	-0.842352	0.671384	0.244218
15240	-0.660557	-0.653766	-1.1774	-0.102084	-1.03706	-1.0015	-1.18197	-0.682354	-0.863047	-0.876629	-1.08756	-0.713157	-0.275692	-0.479787	-1.6832	0.144834	0.0218978	0.0154853	-0.342969	0.448419	-0.592686	-0.695651	-2.23586	-0.0306139	0.84281	0.852686	0.364331	1.31336	0.059805	0.0667697	-0.35536	0.514162	-0.564647	-0.561962	-1.09284	-0.119967	-0.354904	-0.360985	-0.580395	0.00236976	-0.839094	-0.853119	-1.42436	0.0843691	-0.176332	-0.160468	-0.836526	0.669427	0.260238
15280	-0.651488	-0.646679	-1.17553	-0.0927042	-1.04585	-1.01002	-1.19602	-0.683764	-0.87298	-0.887659	-1.10658	-0.713306	-0.295175	-0.489525	-1.65785	0.101527	0.00951349	0.0078753	-0.353853	0.459475	-0.591883	-0.740866	-2.17294	-0.106118	0.841747	0.8514	0.377358	1.278	0.0565195	0.0610919	-0.358783	0.507438	-0.547743	-0.54573	-1.08297	-0.0865353	-0.399665	-0.397239	-0.580417	0.00441189	-0.841467	-0.856678	-1.43656	0.0890792	-0.174494	-0.159986	-0.831005	0.675335	0.275527
15320	-0.640382	-0.637512	-1.16131	-0.0803119	-1.05384	-1.01802	-1.21191	-0.691134	-0.883112	-0.898327	-1.1328	-0.71902	-0.314005	-0.497885	-1.61153	0.0595193	-0.00529892	-0.00103669	-0.372435	0.463106	-0.589751	-0.794569	-2.17908	-0.165904	0.840259	0.849341	0.388705	1.2686	0.0543418	0.056621	-0.364933	0.509884	-0.532078	-0.53112	-1.06766	-0.0427436	-0.444047	-0.434527	-0.594126	0.00509353	-0.844089	-0.859282	-1.44467	0.0880734	-0.174632	-0.161933	-0.822517	0.676919	0.289533
15360	-0.627328	-0.625804	-1.15644	-0.0647684	-1.06091	-1.02543	-1.22426	-0.697687	-0.89348	-0.908791	-1.15184	-0.724973	-0.332281	-0.505196	-1.58227	0.0192347	-0.0222372	-0.0110675	-0.405757	0.466736	-0.58652	-0.853787	-3.14928	-0.196855	0.838386	0.846564	0.398665	1.27399	0.0532803	0.0533699	-0.362356	0.501427	-0.517778	-0.518376	-1.05088	0.00785405	-0.487496	-0.472745	-0.61076	0.00573096	-0.846982	-0.861083	-1.44859	0.0908213	-0.177045	-0.166396	-0.830123	0.672724	0.301701
15400	-0.612416	-0.611499	-1.14342	-0.0472799	-1.06699	-1.03222	-1.23288	-0.703179	-0.904118	-0.919216	-1.17401	-0.73125	-0.350102	-0.511658	-1.50796	-0.0175071	-0.0358255	-0.0219424	-0.453309	0.469216	-0.58242	-0.915465	-4.18603	-0.211586	0.836165	0.843115	0.408507	1.28142	0.0529724	0.0512821	-0.362229	0.491123	-0.505041	-0.507764	-1.03468	0.0580411	-0.529634	-0.511821	-0.639051	0.00589491	-0.850167	-0.862143	-1.45039	0.109231	-0.182024	-0.172877	-0.833086	0.649728	0.31148
15440	-0.595566	-0.594708	-1.135	-0.0323084	-1.07197	-1.03837	-1.24283	-0.703587	-0.915064	-0.929644	-1.18724	-0.735659	-0.367568	-0.517177	-1.43662	-0.0486329	-0.0445876	-0.0331521	-0.502868	0.472509	-0.57768	-0.978055	-5.22327	-0.206401	0.833651	0.838942	0.418718	1.28902	0.0530278	0.0503495	-0.362358	0.481168	-0.495897	-0.499335	-1.0336	0.0893908	-0.570051	-0.551519	-0.683505	0.00589491	-0.853668	-0.862278	-1.45124	0.109298	-0.18881	-0.180483	-0.843713	0.626445	0.318318
15480	-0.576587	-0.575528	-1.11847	-0.014692	-1.07576	-1.04381	-1.24721	-0.70628	-0.926352	-0.939878	-1.19501	-0.729929	-0.384778	-0.521835	-1.3587	-0.0806308	-0.0489439	-0.0435541	-0.546178	0.474984	-0.572528	-1.04056	-6.26342	-0.216902	0.831041	0.834177	0.429256	1.2968	0.0534121	0.050284	-0.360822	0.469826	-0.49101	-0.493157	-1.02801	0.110286	-0.608338	-0.591159	-0.714172	0.00589491	-0.857505	-0.861672	-1.45299	0.110536	-0.196728	-0.18895	-0.852716	0.602942	0.321661
15520	-0.555719	-0.554143	-1.09484	0.0052984	-1.07826	-1.04852	-1.25588	-0.703681	-0.938172	-0.949812	-1.20921	-0.725156	-0.40183	-0.525888	-1.31209	-0.111009	-0.0493147	-0.0529085	-0.578107	0.4768	-0.567195	-1.10149	-7.30295	-0.221046	0.828422	0.829083	0.440144	1.3053	0.0540914	0.0508579	-0.358787	0.481647	-0.490094	-0.489508	-1.01493	0.135901	-0.644086	-0.630024	-0.790252	0.00589491	-0.861702	-0.860568	-1.45446	0.11267	-0.205704	-0.198097	-0.863416	0.581629	0.320956
15560	-0.533217	-0.530883	-1.06625	0.026598	-1.07983	-1.05264	-1.26003	-0.689391	-0.950583	-0.959428	-1.2288	-0.732679	-0.418824	-0.530062	-1.26535	-0.136726	-0.0461205	-0.0607463	-0.632368	0.472845	-0.56191	-1.15768	-8.34343	-0.235618	0.825838	0.823686	0.451382	1.31487	0.0550315	0.0519206	-0.360097	0.483978	-0.49286	-0.488694	-1.00754	0.159056	-0.676887	-0.667509	-0.876949	0.00589491	-0.866279	-0.859166	-1.45393	0.132943	-0.215666	-0.207837	-0.86656	0.566409	0.315652
15600	-0.509335	-0.505938	-1.04669	0.0463197	-1.08137	-1.05624	-1.26447	-0.674847	-0.963423	-0.968714	-1.24213	-0.725341	-0.435859	-0.535231	-1.22444	-0.163793	-0.0397816	-0.0663772	-0.663756	0.482162	-0.556823	-1.2075	-9.38847	-0.226438	0.823333	0.817889	0.463871	1.32424	0.0561981	0.053374	-0.363967	0.483524	-0.49902	-0.490912	-0.995554	0.16844	-0.706331	-0.702851	-0.95491	0.00589491	-0.87126	-0.857686	-1.45528	0.15398	-0.22654	-0.218126	-0.892376	0.534426	0.305195
15640	-0.484329	-0.479745	-1.01937	0.0719727	-1.08294	-1.05943	-1.26846	-0.679126	-0.97653	-0.977654	-1.24064	-0.726789	-0.453035	-0.542148	-1.21934	-0.190927	-0.0307184	-0.0688233	-0.699237	0.472372	-0.547267	-1.2494	-10.428	-0.221769	0.82095	0.811533	0.474633	1.33292	0.0575573	0.0550931	-0.36365	0.476836	-0.508286	-0.496324	-0.986578	0.167062	-0.732008	-0.735163	-1.02171	0.00589491	-0.876665	-0.856383	-1.45557	0.173477	-0.238253	-0.228883	-0.924503	0.501807	0.289033
15680	-0.458452	-0.452662	-1.00009	0.089548	-1.08459	-1.0622	-1.2728	-0.678124	-0.989742	-0.986177	-1.24715	-0.726267	-0.47045	-0.551106	-1.20977	-0.218317	-0.0193513	-0.0675948	-0.724616	0.474262	-0.530777	-1.28085	-11.47	-0.196187	0.818732	0.804425	0.482675	1.33897	0.0590748	0.0569656	-0.364665	0.47331	-0.520369	-0.505089	-0.979514	0.172244	-0.753511	-0.763558	-1.08977	0.00589491	-0.882518	-0.855496	-1.45565	0.179179	-0.250732	-0.239998	-0.944283	0.476016	0.266612
15720	-0.43196	-0.424925	-0.975048	0.116912	-1.08638	-1.06452	-1.27579	-0.677773	-1.0029	-0.994231	-1.26442	-0.727567	-0.488204	-0.562264	-1.21653	-0.241476	-0.00610069	-0.0631781	-0.744807	0.471033	-0.507874	-1.30223	-12.5109	-0.196933	0.816723	0.796427	0.450568	1.34397	0.0607165	0.0588955	-0.359997	0.472248	-0.534982	-0.517187	-0.978373	0.177375	-0.77043	-0.786748	-1.15262	0.00589491	-0.888835	-0.855185	-1.45564	0.163542	-0.263905	-0.251343	-0.965452	0.455974	0.237382
15760	-0.405107	-0.396983	-0.944649	0.143646	-1.08835	-1.06641	-1.27856	-0.665172	-1.01583	-1.00182	-1.28047	-0.725522	-0.506437	-0.576525	-1.23087	-0.26138	0.00861309	-0.0562154	-0.727865	0.463123	-0.479077	-1.31247	-13.5509	-0.169619	0.814968	0.787375	0.363658	1.34755	0.0624484	0.0608258	-0.353699	0.474265	-0.551836	-0.532485	-0.980224	0.163155	-0.782356	-0.803293	-1.20144	0.00589491	-0.895357	-0.855605	-1.45541	0.143501	-0.277697	-0.262757	-0.987625	0.431309	0.200788
15800	-0.378147	-0.369537	-0.921217	0.167589	-1.09056	-1.06791	-1.28104	-0.659002	-1.02839	-1.00882	-1.28192	-0.71693	-0.528396	-0.594522	-1.23487	-0.28492	0.0243696	-0.0471803	-0.722248	0.452703	-0.444908	-1.3118	-14.591	-0.110034	0.813508	0.777062	0.27378	1.34923	0.0642361	0.0626885	-0.352013	0.473135	-0.570644	-0.550437	-0.986144	0.149031	-0.78888	-0.811984	-1.23263	0.00589491	-0.901708	-0.856836	-1.4554	0.114732	-0.292035	-0.274079	-1.00067	0.412187	0.15858
15840	-0.351336	-0.344165	-0.896693	0.190754	-1.09305	-1.06902	-1.28386	-0.655885	-1.0404	-1.0151	-1.27664	-0.713257	-0.55585	-0.616619	-1.24917	-0.306915	0.0407486	-0.0361872	-0.734631	0.454024	-0.405887	-1.30094	-15.631	-0.0657588	0.812388	0.7654	0.18406	1.35007	0.0660457	0.0643283	-0.34846	0.488832	-0.591116	-0.570265	-0.98727	0.130412	-0.789592	-0.81214	-1.24261	0.00589491	-0.907584	-0.858822	-1.45075	0.0828044	-0.306847	-0.285272	-1.01724	0.389251	0.119586
15880	-0.324928	-0.321539	-0.882004	0.205994	-1.09589	-1.06985	-1.2864	-0.66208	-1.05171	-1.02046	-1.27867	-0.707349	-0.588483	-0.643206	-1.26734	-0.258633	0.0573295	-0.0231076	-0.701601	0.460144	-0.362534	-1.2807	-16.671	-0.0306252	0.811652	0.752316	0.093119	1.34997	0.067843	0.0653157	-0.343432	0.486094	-0.612966	-0.591405	-1.00126	0.109778	-0.784085	-0.803721	-1.22779	0.00589491	-0.912685	-0.861772	-1.44122	0.0518683	-0.322059	-0.296626	-1.04184	0.370687	0.0847111
15920	-0.299177	-0.302003	-0.86866	0.227218	-1.0991	-1.07047	-1.28862	-0.646105	-1.06215	-1.02513	-1.27593	-0.696118	-0.62598	-0.67471	-1.27961	-0.254469	0.0736921	-0.00769225	-0.712729	0.469847	-0.31537	-1.25136	-17.711	0.0502874	0.811342	0.737694	0.00552997	1.34931	0.0695929	0.0654689	-0.35715	0.483386	-0.635904	-0.613548	-1.00901	0.0806069	-0.772319	-0.786314	-1.18226	0.004212	-0.916706	-0.86461	-1.42723	0.00978353	-0.337599	-0.308526	-1.06669	0.350229	0.0539273
15960	-0.274338	-0.287016	-0.847326	0.235782	-1.10276	-1.07096	-1.29074	-0.640611	-1.07156	-1.02986	-1.276	-0.686771	-0.668023	-0.711145	-1.30872	-0.27366	0.091692	0.0107314	-0.691982	0.476654	-0.264915	-1.21485	-18.7511	0.163474	0.810414	0.721501	-0.0899364	1.34661	0.0703752	0.0644066	-0.367243	0.483559	-0.659643	-0.636412	-1.021	0.046441	-0.755137	-0.761248	-1.12134	-0.0217541	-0.919347	-0.865589	-1.41102	-0.0224092	-0.353318	-0.321153	-1.08932	0.323654	0.0272074
16000	-0.253391	-0.277225	-0.844669	0.231733	-1.1069	-1.07142	-1.29422	-0.628834	-1.07978	-1.03513	-1.28102	-0.687275	-0.714299	-0.75247	-1.33553	-0.27907	0.113237	0.0322929	-0.657553	0.491006	-0.211691	-1.17385	-19.7911	0.282154	0.804924	0.70371	-0.187695	1.34381	0.0694286	0.0618655	-0.375071	0.481107	-0.683904	-0.659766	-1.03659	0.00626158	-0.733228	-0.730799	-1.06466	-0.0372285	-0.920304	-0.864423	-1.40623	-0.0516258	-0.369002	-0.334602	-1.11015	0.330228	0.00452395
16040	-0.239918	-0.272974	-0.838562	0.22707	-1.11158	-1.07194	-1.29699	-0.625352	-1.08677	-1.04099	-1.28753	-0.677566	-0.76449	-0.798637	-1.35136	-0.332264	0.137986	0.0567553	-0.62304	0.498844	-0.156217	-1.12992	-20.831	0.412959	0.794749	0.684528	-0.28868	1.34038	0.0668026	0.0577103	-0.383036	0.483603	-0.708464	-0.683432	-1.04873	-0.0396769	-0.707273	-0.696189	-1.00866	-0.0429501	-0.919274	-0.86104	-1.39606	-0.0635562	-0.384685	-0.3489	-1.12975	0.31046	-0.0141506
16080	-0.233648	-0.27414	-0.847882	0.236301	-1.11684	-1.07259	-1.30146	-0.618374	-1.09404	-1.04759	-1.29709	-0.666257	-0.81828	-0.849476	-1.38034	-0.393171	0.165595	0.0842139	-0.562469	0.503799	-0.0990147	-1.08431	-21.8103	0.546735	0.780166	0.663936	-0.383694	1.33527	0.0625463	0.0519946	-0.391821	0.4836	-0.733116	-0.707217	-1.05934	-0.0857908	-0.677952	-0.658313	-0.946463	-0.0474454	-0.915957	-0.855408	-1.37956	-0.0913236	-0.400415	-0.364138	-1.14859	0.307686	-0.0288438
16120	-0.234287	-0.28062	-0.851588	0.227423	-1.12224	-1.07344	-1.30696	-0.603048	-1.10217	-1.05508	-1.30739	-0.656481	-0.875355	-0.904764	-1.42311	-0.455492	0.195724	0.114614	-0.54629	0.521564	-0.0406035	-1.03698	-22.5957	0.673409	0.761452	0.641752	-0.463148	1.32968	0.0567092	0.0447582	-0.400666	0.474656	-0.757654	-0.730905	-1.07195	-0.135197	-0.645947	-0.61841	-0.891774	-0.050489	-0.910048	-0.847691	-1.36867	-0.132062	-0.41624	-0.38038	-1.16271	0.308628	-0.0395829
16160	-0.241541	-0.292248	-0.851537	0.209077	-1.12747	-1.07455	-1.31483	-0.601713	-1.11121	-1.06366	-1.32025	-0.648211	-0.935398	-0.964211	-1.46362	-0.588675	0.228031	0.148004	-0.502381	0.53854	0.0184955	-0.982946	-23.2986	0.802469	0.738882	0.617826	-0.528431	1.32386	0.0493407	0.0361104	-0.415388	0.461414	-0.781873	-0.754326	-1.08048	-0.197937	-0.61194	-0.577374	-0.839344	-0.0583607	-0.901245	-0.838084	-1.35759	-0.181606	-0.432208	-0.397724	-1.18117	0.302775	-0.0463956
16200	-0.255117	-0.308784	-0.857164	0.178852	-1.13252	-1.07599	-1.3211	-0.59108	-1.12121	-1.0735	-1.33044	-0.646113	-0.998093	-1.02648	-1.49917	-0.676473	0.262173	0.183929	-0.432776	0.570687	0.0719733	-0.917763	-22.5944	0.922393	0.712733	0.592239	-0.581714	1.31772	0.0404899	0.0261492	-0.433791	0.456789	-0.805567	-0.777452	-1.09135	-0.246084	-0.576611	-0.535891	-0.793483	-0.0710031	-0.889247	-0.826819	-1.34648	-0.208635	-0.448366	-0.416276	-1.19207	0.29446	-0.0493093
16240	-0.274721	-0.329932	-0.869384	0.14771	-1.13739	-1.07783	-1.32833	-0.569797	-1.1322	-1.08485	-1.35103	-0.650421	-1.06312	-1.09014	-1.532	-0.723721	0.297808	0.222589	-0.37588	0.605171	0.103225	-0.838631	-21.6306	0.998241	0.683282	0.564822	-0.624997	1.3101	0.0302062	0.0149987	-0.452811	0.443462	-0.828531	-0.800124	-1.10306	-0.306942	-0.540642	-0.494956	-0.750887	-0.0824062	-0.87375	-0.814122	-1.33202	-0.228472	-0.464762	-0.436156	-1.20203	0.299136	-0.0483514
16280	-0.300061	-0.355305	-0.875936	0.128377	-1.14206	-1.08009	-1.33426	-0.550777	-1.14425	-1.09787	-1.3717	-0.662373	-1.13018	-1.15436	-1.56807	-0.781668	0.334595	0.264346	-0.338706	0.649108	0.113488	-0.747702	-20.4685	1.0836	0.650803	0.535287	-0.664217	1.30211	0.0185391	0.00277863	-0.468306	0.430308	-0.850557	-0.822059	-1.11518	-0.37039	-0.504713	-0.45539	-0.712872	-0.091868	-0.854452	-0.800415	-1.31181	-0.238132	-0.481444	-0.457475	-1.21184	0.291123	-0.0435495
16320	-0.330843	-0.38421	-0.893385	0.0722146	-1.14653	-1.08278	-1.34403	-0.539996	-1.15739	-1.11272	-1.39973	-0.661622	-1.19893	-1.21799	-1.65176	-0.833976	0.372191	0.308361	-0.291582	0.691683	0.105245	-0.65224	-18.0793	1.19288	0.615574	0.503519	-0.701351	1.28516	0.00553765	-0.0104233	-0.484693	0.422055	-0.871441	-0.843018	-1.12415	-0.434666	-0.469508	-0.417849	-0.678612	-0.0840626	-0.831596	-0.786233	-1.29178	-0.255011	-0.49846	-0.480259	-1.22235	0.262702	-0.034931
16360	-0.366774	-0.416321	-0.904884	0.0116731	-1.15078	-1.08584	-1.35023	-0.527242	-1.17168	-1.1295	-1.42847	-0.660725	-1.25928	-1.27951	-1.7662	-0.859647	0.410255	0.3534	-0.241922	0.744647	0.0809777	-0.56049	-15.3458	1.25738	0.57787	0.469355	-0.732453	1.25112	-0.00874863	-0.0246509	-0.495572	0.398686	-0.890976	-0.862874	-1.13056	-0.496259	-0.435705	-0.382966	-0.64203	-0.0514372	-0.808305	-0.771923	-1.27623	-0.268022	-0.515857	-0.503933	-1.23251	0.237265	-0.0225234
16400	-0.40756	-0.451423	-0.926479	-0.0484294	-1.1548	-1.08885	-1.36154	-0.51593	-1.18716	-1.14825	-1.45486	-0.667075	-1.30224	-1.33514	-1.83147	-0.847176	0.448444	0.398387	-0.214881	0.797497	0.043168	-0.479784	-12.481	1.25296	0.537969	0.432599	-0.740001	1.23237	-0.0242705	-0.0399246	-0.511458	0.387015	-0.908957	-0.88146	-1.13758	-0.555561	-0.403988	-0.351513	-0.604661	-0.025185	-0.78522	-0.757588	-1.26431	-0.284776	-0.533683	-0.52774	-1.25124	0.201994	-0.00638462
16440	-0.452908	-0.488478	-0.94182	-0.114937	-1.15858	-1.09166	-1.37107	-0.505187	-1.20387	-1.16833	-1.48007	-0.667647	-1.32923	-1.38014	-1.92394	-0.802154	0.486417	0.441596	-0.19166	0.84628	-0.0057017	-0.416716	-11.4259	1.25086	0.496146	0.393266	-0.762583	1.19613	-0.0409786	-0.0564166	-0.532813	0.37407	-0.925178	-0.898674	-1.14495	-0.61221	-0.375036	-0.323987	-0.576108	-0.00649564	-0.762453	-0.743239	-1.25287	-0.275683	-0.551985	-0.551185	-1.26426	0.170302	0.0122551
16480	-0.502524	-0.526386	-0.949801	-0.173535	-1.16211	-1.09426	-1.3794	-0.49887	-1.22187	-1.18859	-1.50577	-0.67745	-1.34163	-1.41325	-2.04345	-0.76313	0.523832	0.481394	-0.159774	0.893006	-0.0631493	-0.377911	-9.89457	1.26874	0.452415	0.351288	-0.786506	1.12637	-0.058825	-0.074453	-0.541118	0.360195	-0.939433	-0.914548	-1.14932	-0.65474	-0.349355	-0.299466	-0.544156	0.00164667	-0.740118	-0.729137	-1.2393	-0.277592	-0.570804	-0.573965	-1.2612	0.153286	0.0325241
16520	-0.556103	-0.564873	-0.9908	-0.231363	-1.16538	-1.09659	-1.38938	-0.492122	-1.2412	-1.20883	-1.53681	-0.699847	-1.34085	-1.43485	-2.19934	-0.690656	0.558408	0.516939	-0.136268	0.941495	-0.126693	-0.367042	-8.0938	1.17547	0.40653	0.306691	-0.81589	1.04411	-0.0781408	-0.0941256	-0.563396	0.339016	-0.951517	-0.929187	-1.15509	-0.686164	-0.326331	-0.277778	-0.514157	0.00257061	-0.718327	-0.716622	-1.23435	-0.262113	-0.589938	-0.595791	-1.27835	0.124592	0.0540895
16560	-0.609841	-0.603942	-1.02499	-0.275404	-1.16838	-1.09864	-1.39457	-0.486889	-1.26191	-1.22881	-1.55577	-0.716194	-1.3283	-1.44497	-2.27155	-0.622057	0.584443	0.54687	-0.107121	0.991499	-0.19385	-0.381514	-6.24696	1.01218	0.358551	0.259568	-0.842911	0.991041	-0.0991056	-0.115363	-0.591278	0.324443	-0.961476	-0.942693	-1.15724	-0.724562	-0.305856	-0.259032	-0.488886	-0.0028702	-0.697193	-0.705401	-1.23004	-0.229627	-0.608952	-0.616522	-1.29761	0.105751	0.0766181
16600	-0.660915	-0.643411	-1.04838	-0.320169	-1.1711	-1.10036	-1.40124	-0.488716	-1.28335	-1.24809	-1.57627	-0.733484	-1.30537	-1.44333	-2.2739	-0.491044	0.602234	0.570042	-0.0935758	1.0355	-0.262138	-0.414791	-4.49567	0.869836	0.308542	0.210189	-0.860067	0.920074	-0.12157	-0.138061	-0.615359	0.300533	-0.971445	-0.955154	-1.16053	-0.751913	-0.287971	-0.243351	-0.462518	-0.0138221	-0.67683	-0.694762	-1.23439	-0.20714	-0.627409	-0.635981	-1.31142	0.0871438	0.099777
16640	-0.709361	-0.683411	-1.08067	-0.347246	-1.17351	-1.10178	-1.40851	-0.492588	-1.30287	-1.26629	-1.59561	-0.752236	-1.27347	-1.43182	-2.30561	-0.437964	0.612497	0.585299	-0.083163	1.07388	-0.329076	-0.464848	-2.8795	0.711297	0.256565	0.158746	-0.868034	0.830283	-0.145385	-0.162101	-0.639073	0.276264	-0.981929	-0.96677	-1.16576	-0.782972	-0.272719	-0.230813	-0.432526	-0.0294316	-0.657349	-0.684223	-1.21988	-0.164556	-0.644872	-0.653914	-1.31769	0.063473	0.123233
16680	-0.755217	-0.724199	-1.11969	-0.371509	-1.17557	-1.10294	-1.41423	-0.492718	-1.3202	-1.28298	-1.6103	-0.772231	-1.23399	-1.41145	-2.35355	-0.402903	0.615946	0.592709	-0.0779011	1.08538	-0.392181	-0.529727	-3.20669	0.537322	0.202684	0.10569	-0.86749	0.727529	-0.170401	-0.187349	-0.664322	0.257518	-0.992903	-0.977984	-1.17251	-0.803086	-0.260143	-0.221589	-0.411653	-0.0485487	-0.638863	-0.673221	-1.22977	-0.120902	-0.660904	-0.67	-1.31915	0.0453985	0.146654
16720	-0.79852	-0.765575	-1.15522	-0.389683	-1.17727	-1.10387	-1.4212	-0.484725	-1.33534	-1.29773	-1.61875	-0.788524	-1.18834	-1.3827	-2.47276	-0.30155	0.613297	0.59276	-0.0730453	1.09935	-0.448971	-0.602887	-3.51873	0.390369	0.146963	0.051383	-0.859115	0.622791	-0.196468	-0.213673	-0.685085	0.213821	-1.00434	-0.989126	-1.17963	-0.812515	-0.250284	-0.215619	-0.38544	-0.0564198	-0.621487	-0.661246	-1.23612	-0.0636855	-0.675069	-0.683923	-1.32336	0.0271307	0.169705
16760	-0.839306	-0.807259	-1.19803	-0.413758	-1.17861	-1.10463	-1.42873	-0.477692	-1.34827	-1.3104	-1.62729	-0.80901	-1.13792	-1.34619	-2.63507	-0.179299	0.605265	0.586107	-0.0684664	1.10519	-0.497316	-0.676647	-3.38266	0.199719	0.0894641	-0.0038102	-0.843624	0.506835	-0.223437	-0.240916	-0.695085	0.1703	-1.01623	-1.00027	-1.18379	-0.827279	-0.243184	-0.21275	-0.383444	-0.0675673	-0.605331	-0.647439	-1.25615	-0.00900809	-0.68693	-0.695394	-1.33498	0.0128256	0.192055
16800	-0.877613	-0.848725	-1.26279	-0.438832	-1.17959	-1.10525	-1.4358	-0.472335	-1.35896	-1.32091	-1.62873	-0.82711	-1.08413	-1.30347	-2.78865	-0.0761729	0.592565	0.573541	-0.0639378	1.08288	-0.544083	-0.749334	-3.50556	0.0834018	0.0302517	-0.0595347	-0.82166	0.389428	-0.25116	-0.268872	-0.704202	0.133138	-1.02853	-1.01163	-1.19072	-0.840779	-0.238886	-0.212967	-0.385659	-0.0757324	-0.59051	-0.631757	-1.28432	0.0530676	-0.696049	-0.704116	-1.3408	-0.0101305	0.21337
16840	-0.913477	-0.889087	-1.32292	-0.445229	-1.18022	-1.1058	-1.44267	-0.483167	-1.3674	-1.32926	-1.62363	-0.841049	-1.02836	-1.25665	-2.86552	0.0136848	0.575912	0.556475	-0.0598318	1.06654	-0.592812	-0.82085	-2.65305	-0.0210014	-0.0306113	-0.115421	-0.807283	0.27303	-0.279486	-0.297158	-0.718468	0.0972725	-1.04122	-1.02325	-1.20037	-0.850154	-0.237431	-0.216297	-0.38967	-0.088171	-0.577136	-0.614819	-1.30859	0.109159	-0.701989	-0.709887	-1.34622	-0.033407	0.233317
16880	-0.946935	-0.92821	-1.38737	-0.449724	-1.1805	-1.10636	-1.44934	-0.483294	-1.37357	-1.33543	-1.61993	-0.875544	-0.972036	-1.20591	-2.71808	0.110217	0.556022	0.535939	-0.0560295	1.06898	-0.643528	-0.889456	-2.29366	-0.0306252	-0.0930615	-0.171064	-0.79159	0.135943	-0.308267	-0.325359	-0.728835	0.0546726	-1.05427	-1.03515	-1.20781	-0.850976	-0.238862	-0.222448	-0.402322	-0.0970799	-0.565322	-0.596866	-1.32533	0.154947	-0.704314	-0.713164	-1.37321	-0.0504385	0.251563
16920	-0.978025	-0.965959	-1.44839	-0.473986	-1.18043	-1.10696	-1.45266	-0.479464	-1.37746	-1.33934	-1.61494	-0.890151	-0.916915	-1.15278	-2.58801	0.215045	0.533609	0.513153	-0.0519754	1.05401	-0.696255	-0.954995	-2.11067	-0.0762608	-0.157036	-0.226076	-0.771053	0.00151867	-0.337352	-0.353221	-0.739407	0.0277089	-1.06767	-1.0473	-1.22253	-0.854109	-0.243221	-0.2299	-0.409924	-0.101907	-0.555928	-0.57827	-1.35161	0.203934	-0.702586	-0.714587	-1.38262	-0.058433	0.267776
16960	-1.00678	-1.00231	-1.51214	-0.489989	-1.18002	-1.10762	-1.45795	-0.482175	-1.37905	-1.34127	-1.60973	-0.907994	-0.864314	-1.099	-2.55882	0.292607	0.509388	0.489429	-0.0476947	1.02338	-0.751021	-1.01463	-2.11067	-0.0479163	-0.222422	-0.280089	-0.740859	-0.10812	-0.366593	-0.380312	-0.754557	0.00101707	-1.08139	-1.05964	-1.22321	-0.853461	-0.25055	-0.235584	-0.41092	-0.102457	-0.550062	-0.560049	-1.37903	0.253069	-0.696369	-0.714493	-1.40521	-0.0647347	0.281621
17000	-1.03324	-1.03721	-1.56574	-0.503999	-1.17927	-1.10834	-1.46448	-0.481262	-1.37832	-1.34149	-1.60542	-0.92074	-0.814476	-1.04601	-2.42244	0.4159	0.484076	0.465632	-0.0436358	0.998727	-0.80785	-1.06341	-2.11067	-0.0491891	-0.286662	-0.332634	-0.713993	-0.193891	-0.395841	-0.406492	-0.76633	-0.0264161	-1.09541	-1.07204	-1.23193	-0.85544	-0.26089	-0.23878	-0.414863	-0.102454	-0.54714	-0.542887	-1.41934	0.291177	-0.685226	-0.713306	-1.43015	-0.0698082	0.292767
17040	-1.05745	-1.07066	-1.60599	-0.534716	-1.17818	-1.10914	-1.47121	-0.491154	-1.37525	-1.3402	-1.5935	-0.926203	-0.767632	-0.994554	-2.35994	0.577809	0.458386	0.442327	-0.0392705	0.964601	-0.866767	-1.09892	-2.11067	-0.0604782	-0.348335	-0.383542	-0.676896	-0.282683	-0.424948	-0.431769	-0.777361	-0.0549932	-1.10969	-1.08443	-1.25138	-0.846059	-0.274225	-0.239725	-0.413034	-0.100389	-0.546543	-0.527557	-1.44606	0.32836	-0.672033	-0.711501	-1.43171	-0.0735621	0.29953
17080	-1.07945	-1.10246	-1.6704	-0.552192	-1.17675	-1.11001	-1.47635	-0.507372	-1.36983	-1.33768	-1.58592	-0.937943	-0.724012	-0.945289	-2.35329	0.709999	0.432909	0.419854	-0.0350787	0.925566	-0.927799	-1.1228	-2.11067	-0.0306252	-0.407436	-0.432808	-0.633707	-0.363061	-0.4541	-0.456214	-0.786169	-0.0806966	-1.12421	-1.09668	-1.26045	-0.843016	-0.286835	-0.238794	-0.419255	-0.0731976	-0.547651	-0.515002	-1.4665	0.358487	-0.660828	-0.709529	-1.43557	-0.0821981	0.298769
17120	-1.09985	-1.13238	-1.71051	-0.574013	-1.175	-1.11093	-1.4812	-0.51836	-1.36204	-1.3342	-1.57579	-0.95212	-0.683849	-0.899286	-2.35704	0.798544	0.406922	0.397922	-0.0314118	0.88529	-0.99097	-1.13766	-2.11067	-0.0329817	-0.463962	-0.480286	-0.614908	-0.425155	-0.483354	-0.479936	-0.793605	-0.0844934	-1.13895	-1.10856	-1.2736	-0.827389	-0.29665	-0.236481	-0.423118	-0.0389705	-0.549846	-0.505498	-1.49842	0.383077	-0.651604	-0.707623	-1.44388	-0.0926561	0.290634
17160	-1.11906	-1.1603	-1.75741	-0.608712	-1.17291	-1.11189	-1.48458	-0.532253	-1.35364	-1.33004	-1.5639	-0.969966	-0.647374	-0.85704	-2.31568	0.953687	0.38041	0.376689	-0.028339	0.835325	-1.05631	-1.14652	-2.11067	-0.0306252	-0.517908	-0.525983	-0.696347	-0.462328	-0.512517	-0.503062	-0.80616	-0.120348	-1.15273	-1.11989	-1.28797	-0.819259	-0.303879	-0.233313	-0.419791	-0.00922353	-0.552508	-0.499475	-1.5319	0.399334	-0.644344	-0.705983	-1.45312	-0.104277	0.275407
17200	-1.13723	-1.18592	-1.79102	-0.649896	-1.17079	-1.11284	-1.48878	-0.536768	-1.34671	-1.32547	-1.55628	-0.986852	-0.614817	-0.818358	-2.28726	1.14449	0.353678	0.356018	-0.0273489	0.777587	-1.12383	-1.15348	-2.11067	0.0229405	-0.569272	-0.569956	-0.793101	-0.470993	-0.541398	-0.525667	-0.817413	-0.136515	-1.1645	-1.13056	-1.29692	-0.796198	-0.308729	-0.229758	-0.417199	0.0154819	-0.555018	-0.497523	-1.56165	0.41282	-0.639029	-0.704832	-1.46428	-0.114349	0.253369
17240	-1.15453	-1.20907	-1.81808	-0.691446	-1.16922	-1.11378	-1.49063	-0.543952	-1.341	-1.32073	-1.55733	-0.981961	-0.586411	-0.782936	-2.28585	1.22007	0.327034	0.334843	-0.0225243	0.742582	-1.19358	-1.16305	-2.11067	0.11621	-0.61805	-0.612764	-0.8876	-0.431471	-0.569805	-0.54782	-0.823081	-0.151164	-1.17446	-1.14051	-1.31227	-0.781085	-0.31141	-0.226299	-0.414436	0.0408662	-0.556757	-0.49925	-1.57969	0.428379	-0.63564	-0.704391	-1.47293	-0.131183	0.224804
17280	-1.17112	-1.22979	-1.84102	-0.728838	-1.16814	-1.1147	-1.49049	-0.545962	-1.33626	-1.31595	-1.56054	-0.987497	-0.562386	-0.750853	-2.28712	1.33361	0.300782	0.312813	-0.0167349	0.691413	-1.26556	-1.1787	-2.11067	0.158239	-0.664238	-0.65454	-0.993369	-0.409082	-0.597547	-0.569579	-0.838308	-0.170495	-1.18281	-1.14937	-1.32276	-0.763378	-0.31213	-0.223337	-0.416849	0.0795863	-0.557105	-0.504128	-1.59559	0.433034	-0.634157	-0.704922	-1.48279	-0.149655	0.189992
17320	-1.18715	-1.24795	-1.85193	-0.759686	-1.1675	-1.1156	-1.48994	-0.554438	-1.33224	-1.31118	-1.56479	-0.992808	-0.542973	-0.722381	-2.28666	1.39858	0.27523	0.289997	-0.0183645	0.664017	-1.33982	-1.2043	-2.11067	0.195415	-0.707833	-0.695362	-1.08245	-0.402255	-0.624433	-0.590974	-0.858736	-0.182987	-1.18976	-1.15692	-1.33381	-0.759025	-0.311096	-0.221115	-0.41266	0.113177	-0.555444	-0.511058	-1.61708	0.437787	-0.634563	-0.706857	-1.49553	-0.175744	0.149216
17360	-1.20279	-1.26377	-1.85848	-0.787061	-1.16723	-1.11662	-1.48807	-0.575998	-1.32867	-1.30654	-1.57047	-0.998123	-0.528405	-0.696629	-2.28755	1.41285	0.250683	0.266582	-0.0305592	0.65213	-1.41364	-1.24385	-2.11067	0.284441	-0.748831	-0.735438	-1.16532	-0.394942	-0.65027	-0.612013	-0.878074	-0.192491	-1.19551	-1.16328	-1.34469	-0.740748	-0.308517	-0.220075	-0.417782	0.126001	-0.551154	-0.518865	-1.63166	0.440219	-0.636837	-0.710616	-1.50684	-0.207383	0.102759
17400	-1.2182	-1.27755	-1.87202	-0.818363	-1.16726	-1.11793	-1.48492	-0.590831	-1.32531	-1.30255	-1.57737	-1.00006	-0.518912	-0.673089	-2.29046	1.40387	0.227447	0.242864	-0.0595961	0.64401	-1.48125	-1.29918	-2.11067	0.291359	-0.787228	-0.77474	-1.23462	-0.391767	-0.674867	-0.632602	-0.893727	-0.205802	-1.20025	-1.16864	-1.35676	-0.736943	-0.304602	-0.220546	-0.419588	0.1196	-0.543616	-0.527592	-1.65345	0.430744	-0.640962	-0.716089	-1.52455	-0.236504	0.0509009
17440	-1.23354	-1.28968	-1.89279	-0.850361	-1.16753	-1.11948	-1.48062	-0.601822	-1.32189	-1.29941	-1.58194	-1.00697	-0.514725	-0.652694	-2.29203	1.39665	0.205829	0.219246	-0.088934	0.626866	-1.54278	-1.36806	-2.11067	0.345893	-0.823021	-0.813222	-1.29521	-0.412183	-0.698032	-0.652553	-0.925185	-0.217692	-1.20419	-1.17315	-1.36618	-0.730472	-0.299559	-0.222503	-0.4209	0.130518	-0.53221	-0.536572	-1.736	0.427356	-0.646918	-0.723192	-1.51236	-0.274262	-0.00607476
17480	-1.24896	-1.30059	-1.90719	-0.891567	-1.16796	-1.12124	-1.47527	-0.614005	-1.31817	-1.29696	-1.59226	-1.01274	-0.515091	-0.636082	-2.29366	1.39723	0.186135	0.196234	-0.122507	0.616183	-1.59859	-1.44503	-2.11067	0.395181	-0.856308	-0.850593	-1.3638	-0.427014	-0.719574	-0.671672	-0.949758	-0.231616	-1.20752	-1.17693	-1.37569	-0.716301	-0.293596	-0.225656	-0.424695	0.141942	-0.516392	-0.54504	-1.73382	0.409475	-0.654686	-0.731781	-1.51282	-0.312168	-0.0678864
17520	-1.26463	-1.31072	-1.91784	-0.911626	-1.1685	-1.12324	-1.46897	-0.626068	-1.31388	-1.29522	-1.59968	-1.02078	-0.517581	-0.623149	-2.30513	1.43108	0.168671	0.174247	-0.152081	0.5999	-1.64902	-1.52782	-2.11067	0.403241	-0.887883	-0.88649	-1.4215	-0.454741	-0.739301	-0.689767	-0.972698	-0.242248	-1.21046	-1.18015	-1.38326	-0.708324	-0.286922	-0.229769	-0.43317	0.142366	-0.499513	-0.552594	-1.70801	0.420948	-0.664248	-0.741613	-1.494	-0.358398	-0.134252
17560	-1.2807	-1.3205	-1.92077	-0.936833	-1.16907	-1.12546	-1.46267	-0.641229	-1.30878	-1.29424	-1.6073	-1.0301	-0.521831	-0.614048	-2.33228	1.43214	0.153742	0.153625	-0.176925	0.591377	-1.69443	-1.6134	-2.11067	0.45829	-0.917798	-0.920507	-1.46236	-0.492641	-0.757022	-0.706671	-0.996684	-0.251765	-1.21319	-1.18291	-1.38371	-0.703739	-0.279744	-0.234666	-0.44321	0.159891	-0.483804	-0.559348	-1.67455	0.425676	-0.675158	-0.752374	-1.48547	-0.393826	-0.204889
17600	-1.29734	-1.33037	-1.95323	-0.943589	-1.16961	-1.12785	-1.45672	-0.660322	-1.3026	-1.29403	-1.62094	-1.03573	-0.527581	-0.609583	-2.35228	1.4281	0.141656	0.134732	-0.201287	0.568384	-1.73517	-1.69613	-2.28879	0.508644	-0.945906	-0.952195	-1.50051	-0.551339	-0.772548	-0.722263	-1.02106	-0.260583	-1.21592	-1.18515	-1.38947	-0.69688	-0.272271	-0.240055	-0.453175	0.181739	-0.469458	-0.565488	-1.65901	0.429749	-0.685309	-0.763862	-1.49461	-0.43174	-0.279516
17640	-1.31463	-1.34069	-1.96054	-0.955307	-1.17006	-1.13036	-1.45028	-0.685452	-1.2951	-1.29472	-1.63456	-1.04176	-0.534571	-0.609375	-2.36094	1.42125	0.13271	0.118019	-0.221527	0.549482	-1.77158	-1.77035	-2.51735	0.444278	-0.972059	-0.981082	-1.54083	-0.622287	-0.785973	-0.736473	-1.04034	-0.269056	-1.21885	-1.18683	-1.39009	-0.689312	-0.264968	-0.245754	-0.4636	0.192746	-0.456664	-0.571183	-1.79155	0.422838	-0.694496	-0.775888	-1.49552	-0.464592	-0.357405
17680	-1.33163	-1.35165	-1.95127	-0.969608	-1.17034	-1.13295	-1.44112	-0.709078	-1.28613	-1.29664	-1.66067	-1.04675	-0.542541	-0.612082	-2.35556	1.40678	0.124852	0.103657	-0.238297	0.543049	-1.80402	-1.83233	-2.78088	0.290568	-0.996111	-1.00692	-1.56179	-0.659706	-0.79754	-0.749265	-1.06393	-0.280266	-1.22218	-1.18793	-1.39281	-0.674659	-0.258537	-0.251665	-0.474363	0.204739	-0.445615	-0.576192	-1.87641	0.416811	-0.70281	-0.788252	-1.49667	-0.494082	-0.432802
17720	-1.34797	-1.36346	-1.95535	-0.979947	-1.1704	-1.13553	-1.43441	-0.731112	-1.27819	-1.29993	-1.69787	-1.04761	-0.55123	-0.616331	-2.33344	1.39513	0.11632	0.0914214	-0.268778	0.536641	-1.83284	-1.87561	-3.07054	0.283925	-1.01791	-1.02944	-1.57349	-0.704054	-0.807398	-0.76057	-1.08429	-0.284526	-1.2257	-1.18856	-1.39697	-0.674074	-0.253076	-0.257713	-0.490614	0.208914	-0.436503	-0.579432	-1.86946	0.405033	-0.710344	-0.800745	-1.50944	-0.524312	-0.503822
17760	-1.3636	-1.37604	-1.96951	-0.97961	-1.17048	-1.13805	-1.42315	-0.752958	-1.27226	-1.30459	-1.74972	-1.05642	-0.560378	-0.621509	-2.29368	1.3899	0.107121	0.0810395	-0.29622	0.539377	-1.85838	-1.89968	-3.36663	0.335272	-1.03732	-1.04851	-1.56513	-0.764269	-0.8157	-0.770352	-1.10467	-0.287199	-1.22782	-1.18841	-1.3982	-0.66577	-0.248662	-0.263822	-0.517627	0.189002	-0.429517	-0.580861	-2.00668	0.377134	-0.717187	-0.813175	-1.52105	-0.546535	-0.570208
17800	-1.37845	-1.38902	-1.98045	-0.989229	-1.17076	-1.14045	-1.4139	-0.778401	-1.26827	-1.31048	-1.80194	-1.06412	-0.569727	-0.627189	-2.25121	1.38767	0.097261	0.0720005	-0.321705	0.538566	-1.88101	-1.90501	-3.52068	0.265337	-1.05419	-1.06401	-1.54702	-0.811425	-0.822595	-0.778671	-1.11965	-0.29836	-1.22834	-1.18715	-1.39716	-0.658311	-0.245374	-0.269896	-0.54278	0.188939	-0.424851	-0.581453	-2.13091	0.343748	-0.723431	-0.825319	-1.52282	-0.554232	-0.631703
17840	-1.39244	-1.40204	-1.99078	-0.999164	-1.17126	-1.14273	-1.40586	-0.802678	-1.2661	-1.31751	-1.85235	-1.05967	-0.579014	-0.63332	-2.20883	1.38027	0.0867464	0.0640847	-0.347402	0.536827	-1.90108	-1.89344	-3.62112	0.302368	-1.06836	-1.07653	-1.51518	-0.858002	-0.828234	-0.785711	-1.13147	-0.294141	-1.22721	-1.18464	-1.39814	-0.651201	-0.243287	-0.275831	-0.568501	0.168613	-0.422694	-0.58216	-2.22752	0.304146	-0.729168	-0.836899	-1.5276	-0.548449	-0.688052
17880	-1.40552	-1.41505	-1.99519	-1.00513	-1.17198	-1.14502	-1.39823	-0.828019	-1.26567	-1.32633	-1.89879	-1.04731	-0.587981	-0.639459	-2.1686	1.36531	0.0755836	0.057084	-0.370683	0.536179	-1.91892	-1.86934	-3.55628	0.42905	-1.0797	-1.08678	-1.48336	-0.867023	-0.832769	-0.791622	-1.14809	-0.29227	-1.22444	-1.18081	-1.39567	-0.647117	-0.24248	-0.281507	-0.601719	0.137921	-0.42324	-0.583471	-2.28138	0.255198	-0.734489	-0.84751	-1.53376	-0.540815	-0.738997
17920	-1.4176	-1.42767	-2.00291	-0.999175	-1.17293	-1.14735	-1.3886	-0.850159	-1.26688	-1.33746	-1.96754	-1.03259	-0.596367	-0.644506	-2.13149	1.35749	0.0637787	0.0499844	-0.393665	0.532729	-1.93529	-1.83759	-3.43611	0.566002	-1.08806	-1.09537	-1.45464	-0.873841	-0.836349	-0.796417	-1.15602	-0.288384	-1.21998	-1.17558	-1.39205	-0.651152	-0.24303	-0.286844	-0.640977	0.115264	-0.426678	-0.584204	-2.27842	0.195738	-0.739486	-0.856849	-1.56281	-0.530955	-0.784281
17960	-1.42863	-1.4393	-2.01534	-0.992492	-1.17413	-1.14978	-1.38073	-0.868887	-1.26965	-1.34986	-2.01593	-1.01427	-0.603912	-0.648309	-2.09915	1.34998	0.0513381	0.0418868	-0.416764	0.521825	-1.95534	-1.8022	-3.23308	0.646375	-1.09328	-1.10284	-1.42623	-0.879703	-0.839127	-0.800011	-1.17069	-0.286298	-1.21381	-1.16889	-1.38785	-0.658474	-0.245015	-0.292246	-0.664795	0.0940139	-0.433201	-0.583782	-2.16662	0.14755	-0.744248	-0.864666	-1.58911	-0.503969	-0.823648
18000	-1.43853	-1.44961	-2.02729	-0.983452	-1.17556	-1.15237	-1.37225	-0.885169	-1.27386	-1.36308	-2.09345	-1.00134	-0.610357	-0.65118	-2.07905	1.3415	0.038268	0.0324268	-0.434495	0.536491	-1.97971	-1.7669	-3.02003	0.704061	-1.09644	-1.10966	-1.40141	-0.885255	-0.841251	-0.802441	-1.17927	-0.283765	-1.20592	-1.16074	-1.38109	-0.680006	-0.248511	-0.297722	-0.711067	0.0782985	-0.442999	-0.582812	-2.0046	0.110576	-0.748869	-0.870652	-1.61825	-0.470654	-0.856841
18040	-1.44724	-1.45847	-2.03882	-0.968407	-1.17726	-1.15511	-1.35763	-0.897211	-1.27943	-1.37678	-2.1672	-0.990805	-0.614773	-0.653108	-2.05954	1.32863	0.0245748	0.0214655	-0.452862	0.622717	-2.00727	-1.73505	-2.75768	0.827389	-1.10099	-1.11622	-1.37687	-0.890097	-0.842875	-0.803813	-1.18089	-0.282555	-1.19628	-1.15114	-1.37291	-0.67094	-0.253596	-0.30337	-0.746584	0.0480664	-0.456265	-0.581996	-1.87745	0.066996	-0.753439	-0.87446	-1.61106	-0.429799	-0.883604
18080	-1.45469	-1.46584	-2.03858	-0.956941	-1.17921	-1.15799	-1.34847	-0.901807	-1.28627	-1.39034	-2.28655	-0.977891	-0.61491	-0.654038	-2.04181	1.32132	0.0102647	0.00915853	-0.471362	0.681748	-2.03692	-1.70801	-2.50048	0.955196	-1.10692	-1.12267	-1.36708	-0.895544	-0.844147	-0.804176	-1.1808	-0.28571	-1.18486	-1.14006	-1.36246	-0.667693	-0.260347	-0.309306	-0.786333	0.0234631	-0.472194	-0.581943	-1.75953	0.0329739	-0.758016	-0.875804	-1.612	-0.388449	-0.903679
18120	-1.46081	-1.47165	-2.05	-0.957868	-1.18144	-1.16099	-1.34294	-0.911757	-1.29428	-1.40321	-2.41632	-0.96809	-0.611406	-0.654043	-2.02837	1.31054	-0.00465596	-0.00443124	-0.486754	0.69635	-2.06754	-1.68399	-2.34633	0.991614	-1.11398	-1.12924	-1.36383	-0.900549	-0.845219	-0.803569	-1.17951	-0.291738	-1.17165	-1.1276	-1.35028	-0.670685	-0.268843	-0.315571	-0.825396	0.0234071	-0.484633	-0.581145	-1.61728	-0.00149036	-0.760947	-0.874379	-1.615	-0.339913	-0.916809
18160	-1.46553	-1.47582	-2.06953	-0.957814	-1.18395	-1.16405	-1.33674	-0.912475	-1.30337	-1.41512	-2.50662	-0.956804	-0.605168	-0.653191	-2.02073	1.29385	-0.0201809	-0.0189698	-0.505363	0.67339	-2.09801	-1.65743	-2.2039	0.976915	-1.12189	-1.13611	-1.38563	-0.904287	-0.846213	-0.802064	-1.16885	-0.29563	-1.15661	-1.11392	-1.33865	-0.66778	-0.279159	-0.32201	-0.874349	0.0357034	-0.492703	-0.578382	-1.56668	-0.0299988	-0.761186	-0.869863	-1.62783	-0.285981	-0.922739
18200	-1.46887	-1.47822	-2.08697	-0.936005	-1.18675	-1.16705	-1.32982	-0.90784	-1.31344	-1.4257	-2.58488	-0.949066	-0.597103	-0.651227	-2.01459	1.27572	-0.0363039	-0.0344132	-0.529955	0.618892	-2.12721	-1.61813	-2.22181	1.01639	-1.13041	-1.14309	-1.41907	-0.910438	-0.845818	-0.799769	-1.16822	-0.301255	-1.13973	-1.09906	-1.32669	-0.651903	-0.291159	-0.328597	-0.909211	0.0235874	-0.496657	-0.573872	-1.55437	-0.0563739	-0.758624	-0.861946	-1.64114	-0.226026	-0.921212
18240	-1.47132	-1.47879	-2.08978	-0.926665	-1.18985	-1.16989	-1.32575	-0.903769	-1.32422	-1.43454	-2.64803	-0.946416	-0.588118	-0.647641	-2.00035	1.24998	-0.0531623	-0.050701	-0.544611	0.540861	-2.15404	-1.56588	-2.27301	1.20285	-1.13927	-1.15004	-1.44313	-0.916836	-0.843431	-0.796762	-1.16384	-0.309624	-1.12098	-1.0834	-1.3139	-0.663179	-0.303102	-0.33544	-0.952995	0.0180943	-0.496745	-0.567574	-1.5358	-0.0774521	-0.75315	-0.850272	-1.64172	-0.176431	-0.91197
18280	-1.47303	-1.47765	-2.11249	-0.925156	-1.19329	-1.17248	-1.32369	-0.905281	-1.33485	-1.44119	-2.67409	-0.94076	-0.57912	-0.642834	-1.9928	1.22318	-0.0708882	-0.0675481	-0.562624	0.462754	-2.17738	-1.50201	-2.34673	1.70426	-1.1482	-1.15684	-1.46267	-0.92367	-0.839291	-0.793157	-1.15898	-0.312769	-1.10039	-1.06751	-1.30488	-0.680244	-0.314591	-0.34266	-0.99969	0.00627062	-0.49322	-0.559579	-1.51554	-0.0949634	-0.744655	-0.834631	-1.63132	-0.111619	-0.899236
18320	-1.47404	-1.47502	-2.13113	-0.915954	-1.1974	-1.17478	-1.32059	-0.903436	-1.34517	-1.44522	-2.63812	-0.937637	-0.571016	-0.637212	-1.90596	1.20935	-0.0890789	-0.0845429	-0.575624	0.401013	-2.19611	-1.429	-2.4176	3.24493	-1.15696	-1.16333	-1.48044	-0.931848	-0.83364	-0.789153	-1.15409	-0.312386	-1.07984	-1.05168	-1.29169	-0.680002	-0.325628	-0.350451	-1.03639	0.00213274	-0.486334	-0.549818	-1.48723	-0.0993945	-0.733027	-0.815146	-1.61407	-0.0543346	-0.888919
18360	-1.47439	-1.47097	-2.14279	-0.915022	-1.20214	-1.17701	-1.31957	-0.896635	-1.35512	-1.44683	-2.58798	-0.939743	-0.564712	-0.631438	-1.79201	1.19874	-0.107311	-0.101179	-0.585708	0.335049	-2.20911	-1.34975	-2.4859	4.70547	-1.16526	-1.16935	-1.48606	-0.946166	-0.826717	-0.784891	-1.15047	-0.318927	-1.06032	-1.03599	-1.27932	-0.685482	-0.336217	-0.358968	-1.03577	-0.00184818	-0.476338	-0.538111	-1.46649	-0.106993	-0.718157	-0.793029	-1.59471	0.00027258	-0.881015
18400	-1.47415	-1.46568	-2.15404	-0.901041	-1.2074	-1.17916	-1.31891	-0.885645	-1.36466	-1.44767	-2.5041	-0.939095	-0.561115	-0.62751	-1.70247	1.17435	-0.125162	-0.117265	-0.597291	0.370897	-2.21527	-1.26583	-2.56343	5.82145	-1.17287	-1.17481	-1.47481	-0.963899	-0.818764	-0.780419	-1.15576	-0.335415	-1.04188	-1.02053	-1.26853	-0.682942	-0.346359	-0.368168	-1.02558	-0.011934	-0.463484	-0.52567	-1.44168	-0.103251	-0.699934	-0.769059	-1.57415	0.054596	-0.87549
18440	-1.47335	-1.45994	-2.14549	-0.890383	-1.21306	-1.18119	-1.31893	-0.873189	-1.37374	-1.44843	-2.45843	-0.934977	-0.561133	-0.626024	-1.70301	1.15358	-0.142208	-0.132502	-0.601525	0.412116	-2.21348	-1.17939	-2.63766	7.02248	-1.1795	-1.17967	-1.4529	-0.985498	-0.810021	-0.775728	-1.15673	-0.343581	-1.02454	-1.00532	-1.25828	-0.674653	-0.356058	-0.378325	-1.01213	-0.0226274	-0.448023	-0.513483	-1.41373	-0.0962377	-0.678249	-0.743487	-1.55395	0.103566	-0.872308
18480	-1.47204	-1.45434	-2.14297	-0.873548	-1.21903	-1.18316	-1.31956	-0.856547	-1.38232	-1.44903	-2.38447	-0.925132	-0.565672	-0.627262	-1.71059	1.14324	-0.158026	-0.146531	-0.595494	0.437303	-2.20261	-1.09626	-2.67631	7.87922	-1.18491	-1.18402	-1.42271	-1.00985	-0.800729	-0.770895	-1.16024	-0.344551	-1.00837	-0.990453	-1.24948	-0.667705	-0.365315	-0.389379	-1.01101	-0.0357037	-0.430209	-0.501378	-1.37817	-0.093658	-0.65299	-0.716575	-1.52687	0.161743	-0.871434
18520	-1.47027	-1.44913	-2.1485	-0.87816	-1.22518	-1.18509	-1.31984	-0.848119	-1.39033	-1.44942	-2.3122	-0.921859	-0.575639	-0.631636	-1.7319	1.12604	-0.172194	-0.159086	-0.600728	0.354552	-2.18469	-1.02277	-2.68562	8.31477	-1.18984	-1.18822	-1.39044	-1.03765	-0.791127	-0.766007	-1.16397	-0.357113	-0.993392	-0.976007	-1.24569	-0.659719	-0.374134	-0.401081	-0.973256	-0.0466648	-0.410292	-0.489131	-1.35653	-0.0862311	-0.624048	-0.688622	-1.50366	0.217046	-0.872834
18560	-1.4681	-1.44433	-2.15218	-0.841431	-1.2314	-1.18699	-1.32298	-0.834943	-1.39774	-1.44967	-2.20184	-0.919228	-0.59194	-0.639559	-1.74689	1.09281	-0.184287	-0.169742	-0.601761	0.360198	-2.16396	-0.965364	-2.66591	8.26272	-1.19547	-1.19242	-1.35845	-1.06422	-0.781458	-0.761168	-1.16003	-0.369308	-0.979658	-0.962005	-1.24133	-0.65368	-0.382517	-0.413233	-0.952587	-0.0550932	-0.388524	-0.476543	-1.32707	-0.104346	-0.591313	-0.659554	-1.48163	0.264341	-0.876471
18600	-1.46556	-1.44002	-2.15338	-0.840938	-1.2376	-1.18881	-1.32135	-0.80623	-1.40449	-1.44989	-2.13672	-0.925762	-0.614628	-0.651264	-1.77131	1.05306	-0.193883	-0.178435	-0.601351	0.322435	-2.13999	-0.925331	-2.59033	7.82596	-1.20193	-1.19683	-1.32812	-1.09111	-0.771961	-0.756474	-1.16246	-0.369715	-0.967208	-0.948447	-1.23429	-0.644179	-0.390466	-0.425577	-0.956187	-0.0682854	-0.365157	-0.463639	-1.29178	-0.0775465	-0.554674	-0.629304	-1.45606	0.310101	-0.882312
18640	-1.46271	-1.4362	-2.13419	-0.810214	-1.24365	-1.19055	-1.32262	-0.779686	-1.41054	-1.45006	-2.09736	-0.929513	-0.639061	-0.666626	-1.8093	1.01244	-0.200559	-0.185328	-0.607338	0.297442	-2.11228	-0.903534	-2.47925	7.39106	-1.20934	-1.20155	-1.30041	-1.12246	-0.762877	-0.752012	-1.16848	-0.366673	-0.956085	-0.935454	-1.22981	-0.626819	-0.397983	-0.437738	-0.972632	-0.0800577	-0.340444	-0.450514	-1.26211	-0.0783609	-0.516577	-0.59786	-1.42814	0.355349	-0.89032
18680	-1.45959	-1.43286	-2.13199	-0.781876	-1.24945	-1.1922	-1.32367	-0.75843	-1.41584	-1.45013	-2.06816	-0.944743	-0.664223	-0.68512	-1.86831	0.981245	-0.203892	-0.191421	-0.617394	0.285437	-2.08033	-0.900965	-2.37467	6.74525	-1.21784	-1.20684	-1.30546	-1.14355	-0.754446	-0.747867	-1.17433	-0.355768	-0.946331	-0.923111	-1.23061	-0.607516	-0.405073	-0.449329	-0.962946	-0.0927344	-0.315308	-0.437112	-1.23379	-0.0667051	-0.482718	-0.565254	-1.4025	0.39792	-0.900461
18720	-1.45626	-1.42992	-2.0764	-0.755872	-1.25489	-1.19365	-1.32334	-0.737713	-1.42033	-1.44992	-2.05204	-0.95303	-0.689903	-0.705815	-1.92987	0.964825	-0.203458	-0.197131	-0.641545	0.289645	-2.04366	-0.917315	-2.2564	6.33789	-1.22755	-1.21283	-1.31066	-1.15152	-0.746903	-0.744132	-1.17973	-0.348124	-0.937988	-0.91167	-1.23275	-0.580977	-0.411736	-0.459891	-0.939406	-0.103137	-0.29143	-0.423474	-1.20897	-0.054003	-0.453007	-0.531571	-1.38019	0.435692	-0.9127
18760	-1.45268	-1.42712	-2.08865	-0.735056	-1.25985	-1.19485	-1.32292	-0.717529	-1.42396	-1.44926	-2.05128	-0.950882	-0.715895	-0.728412	-1.99067	0.927691	-0.198834	-0.202013	-0.659871	0.299187	-2.00177	-0.950823	-2.15272	6.01179	-1.23859	-1.21941	-1.32597	-1.1349	-0.740182	-0.740897	-1.18576	-0.3361	-0.931099	-0.9016	-1.23667	-0.549686	-0.41797	-0.468993	-0.918505	-0.116306	-0.269274	-0.409818	-1.16507	-0.0275753	-0.42711	-0.49708	-1.36929	0.473521	-0.927001
18800	-1.44853	-1.42406	-2.1035	-0.72943	-1.26423	-1.19577	-1.32256	-0.700028	-1.42636	-1.44792	-2.03924	-0.953965	-0.741988	-0.752897	-2.04969	0.893324	-0.189974	-0.20565	-0.676294	0.308545	-1.95417	-0.998692	-2.11067	5.58507	-1.25108	-1.22677	-1.36092	-1.08898	-0.734215	-0.738319	-1.19852	-0.336558	-0.925706	-0.893079	-1.24181	-0.517318	-0.422054	-0.47632	-0.927414	-0.117145	-0.249269	-0.396522	-1.11685	-0.026481	-0.404695	-0.462357	-1.34997	0.516252	-0.943329
18840	-1.44372	-1.42057	-2.1214	-0.713806	-1.26829	-1.19679	-1.32366	-0.68767	-1.4271	-1.44577	-2.01891	-0.96683	-0.767976	-0.778364	-2.10521	0.856814	-0.179538	-0.207344	-0.730435	0.325652	-1.90036	-1.05579	-2.11067	5.15006	-1.26516	-1.23511	-1.40079	-1.04126	-0.729043	-0.736593	-1.20413	-0.309037	-0.921852	-0.886078	-1.2464	-0.493507	-0.422808	-0.481506	-0.929229	-0.122385	-0.231843	-0.383676	-1.08359	-0.000814848	-0.385427	-0.429067	-1.33854	0.555756	-0.96165
18880	-1.43817	-1.41648	-2.14076	-0.700408	-1.27277	-1.19818	-1.32693	-0.678933	-1.42647	-1.44277	-1.98599	-0.967554	-0.793649	-0.80422	-2.15496	0.811729	-0.168125	-0.206772	-0.772695	0.349301	-1.83986	-1.11537	-2.11067	4.69163	-1.28094	-1.24446	-1.44234	-0.991618	-0.724706	-0.735819	-1.21382	-0.288187	-0.918935	-0.880451	-1.25236	-0.459578	-0.420482	-0.484164	-0.934365	-0.12817	-0.217426	-0.370935	-1.05543	0.0222628	-0.368976	-0.398632	-1.32415	0.590057	-0.981385
18920	-1.43179	-1.41166	-2.16008	-0.696338	-1.27756	-1.19983	-1.32841	-0.677027	-1.42475	-1.43915	-1.96103	-0.971471	-0.818798	-0.830192	-2.19818	0.757597	-0.15573	-0.204082	-0.817468	0.36986	-1.77216	-1.16907	-2.11067	4.16856	-1.29856	-1.25481	-1.48168	-0.939484	-0.721244	-0.736255	-1.23165	-0.273125	-0.915555	-0.87595	-1.25639	-0.424035	-0.415323	-0.482997	-0.951621	-0.134165	-0.206447	-0.358475	-1.04996	0.0526687	-0.355006	-0.371294	-1.30628	0.618118	-0.999329
18960	-1.42451	-1.40603	-2.15469	-0.695114	-1.28255	-1.20169	-1.33168	-0.680596	-1.42221	-1.43525	-1.93102	-0.972719	-0.843215	-0.856018	-2.23347	0.701007	-0.14235	-0.199035	-0.857244	0.402138	-1.69677	-1.20992	-2.11067	3.56432	-1.31813	-1.26601	-1.52642	-0.884124	-0.718697	-0.737946	-1.24181	-0.257827	-0.911652	-0.872282	-1.26228	-0.396061	-0.407579	-0.477434	-0.96486	-0.132772	-0.199334	-0.346902	-1.04874	0.0835252	-0.343186	-0.347323	-1.29883	0.64255	-1.01513
19000	-1.41625	-1.39951	-2.16124	-0.663891	-1.28763	-1.20371	-1.3312	-0.688643	-1.41914	-1.43124	-1.90418	-0.970641	-0.866692	-0.881314	-2.25995	0.646212	-0.127981	-0.191305	-0.90084	0.44639	-1.6132	-1.23261	-2.11067	2.9431	-1.33963	-1.27786	-1.56808	-0.827307	-0.717106	-0.740872	-1.25675	-0.259698	-0.907213	-0.869192	-1.26382	-0.360328	-0.397499	-0.467867	-0.967835	-0.131731	-0.196517	-0.336913	-1.06129	0.120359	-0.333182	-0.326821	-1.28023	0.665263	-1.029
19040	-1.40693	-1.39209	-2.17073	-0.659113	-1.29266	-1.2058	-1.33292	-0.700049	-1.41583	-1.42733	-1.88008	-0.949155	-0.88902	-0.906116	-2.27649	0.584091	-0.112622	-0.180827	-0.941002	0.49444	-1.52096	-1.23581	-2.11067	2.28588	-1.35889	-1.29005	-1.61526	-0.768034	-0.716511	-0.744946	-1.26806	-0.24868	-0.902226	-0.866232	-1.26746	-0.319207	-0.385332	-0.454738	-0.973874	-0.133028	-0.198425	-0.329145	-1.06983	0.157329	-0.324661	-0.309463	-1.26714	0.683384	-1.04113
19080	-1.39647	-1.38378	-2.17135	-0.681772	-1.29754	-1.20791	-1.33377	-0.711575	-1.41254	-1.42363	-1.86746	-0.945152	-0.90999	-0.930339	-2.28541	0.518743	-0.0962667	-0.167721	-0.954515	0.545002	-1.42033	-1.22027	-2.11067	1.74086	-1.37432	-1.30222	-1.66035	-0.707373	-0.716953	-0.75009	-1.27893	-0.24529	-0.89668	-0.862914	-1.26896	-0.286622	-0.371325	-0.438631	-0.979297	-0.130632	-0.205487	-0.324029	-1.07238	0.206812	-0.317291	-0.294843	-1.25671	0.696817	-1.05173
19120	-1.38479	-1.37455	-2.12848	-0.712894	-1.30214	-1.20997	-1.3337	-0.71944	-1.40957	-1.42033	-1.84932	-0.925151	-0.929394	-0.95336	-2.48731	0.445065	-0.0789135	-0.152261	-0.995801	0.596111	-1.31761	-1.18522	-2.11067	1.3534	-1.38636	-1.31393	-1.70112	-0.645455	-0.718472	-0.756196	-1.29024	-0.243263	-0.890563	-0.858756	-1.27104	-0.249791	-0.355728	-0.420087	-0.993256	-0.127492	-0.218131	-0.321873	-1.08785	0.270474	-0.310737	-0.28272	-1.24961	0.706706	-1.061
19160	-1.37182	-1.36436	-2.12119	-0.735318	-1.30634	-1.21193	-1.33388	-0.721455	-1.40719	-1.41751	-1.84881	-0.89996	-0.947038	-0.973956	-2.4896	0.378054	-0.0605587	-0.134987	-1.01184	0.641091	-1.21434	-1.13686	-2.11067	1.01064	-1.39545	-1.32498	-1.7405	-0.582442	-0.721108	-0.763148	-1.30366	-0.2468	-0.883864	-0.853589	-1.27412	-0.21385	-0.338787	-0.399581	-0.981698	-0.122465	-0.236788	-0.323406	-1.11395	0.331088	-0.304597	-0.272897	-1.2456	0.721132	-1.06915
19200	-1.35748	-1.35311	-2.13578	-0.763758	-1.31003	-1.21373	-1.33532	-0.72479	-1.40568	-1.4153	-1.85116	-0.903828	-0.962896	-0.991788	-2.4896	0.313736	-0.0411987	-0.116275	-1.02308	0.692043	-1.11068	-1.0756	-2.11067	0.822368	-1.40201	-1.33522	-1.77684	-0.518467	-0.724902	-0.770798	-1.31786	-0.242358	-0.87657	-0.847102	-1.27287	-0.178894	-0.320752	-0.377712	-0.977017	-0.108888	-0.261885	-0.329082	-1.14399	0.386754	-0.297931	-0.265084	-1.23995	0.740783	-1.07638
19240	-1.34168	-1.34101	-2.10857	-0.765693	-1.31308	-1.21531	-1.33822	-0.736465	-1.40533	-1.4139	-1.84973	-0.906865	-0.976868	-1.00698	-2.4896	0.262299	-0.0208303	-0.0962634	-1.07654	0.7579	-1.00672	-1.00137	-2.11067	0.410054	-1.4065	-1.34448	-1.80308	-0.454287	-0.729893	-0.779058	-1.32991	-0.25228	-0.86867	-0.838572	-1.27241	-0.14559	-0.301871	-0.355091	-0.962577	-0.091795	-0.293804	-0.33916	-1.17987	0.436051	-0.290612	-0.258946	-1.24382	0.759032	-1.08289
19280	-1.32435	-1.32829	-2.08542	-0.771144	-1.31538	-1.21663	-1.34521	-0.744595	-1.40642	-1.41364	-1.85514	-0.904043	-0.98882	-1.01951	-2.4896	0.229912	0.000549991	-0.0752186	-1.16134	0.812258	-0.90261	-0.915384	-2.11067	0.287906	-1.40933	-1.35258	-1.82761	-0.390107	-0.736162	-0.787968	-1.34478	-0.258119	-0.860152	-0.827814	-1.26867	-0.113752	-0.282392	-0.332279	-0.930158	-0.0730824	-0.329792	-0.35375	-1.21612	0.489344	-0.282739	-0.254255	-1.25164	0.7685	-1.08889
19320	-1.30649	-1.3148	-2.07238	-0.791797	-1.3168	-1.21774	-1.35172	-0.751737	-1.4092	-1.41485	-1.87598	-0.908296	-0.998615	-1.02898	-2.4896	0.223188	0.0229455	-0.0531822	-1.21675	0.855986	-0.798466	-0.819863	-2.11067	0.250944	-1.41096	-1.35951	-1.85428	-0.325927	-0.7448	-0.79777	-1.35818	-0.263863	-0.851004	-0.815015	-1.26662	-0.0830901	-0.262563	-0.309848	-0.914923	-0.0521068	-0.367585	-0.373254	-1.25244	0.551657	-0.27441	-0.250641	-1.25978	0.772982	-1.09458
19360	-1.29051	-1.30038	-2.04628	-0.811992	-1.31724	-1.21884	-1.35564	-0.761425	-1.41251	-1.41742	-1.89468	-0.918436	-1.00612	-1.03435	-2.48904	0.254181	0.0462791	-0.0304244	-1.248	0.908936	-0.694414	-0.716949	-2.11067	0.138693	-1.41181	-1.36579	-1.87794	-0.261747	-0.756124	-0.80854	-1.3679	-0.27081	-0.841216	-0.800414	-1.25912	-0.0535929	-0.243201	-0.288517	-0.910793	-0.0398988	-0.406543	-0.395598	-1.28876	0.608679	-0.265724	-0.247145	-1.26115	0.777508	-1.10016
19400	-1.27636	-1.28546	-2.02033	-0.812767	-1.31723	-1.21982	-1.35882	-0.764125	-1.41566	-1.42083	-1.90548	-0.930709	-1.01119	-1.0351	-2.48578	0.25046	0.0644898	-0.00807028	-1.31525	0.965018	-0.59058	-0.609926	-2.11067	0.194168	-1.41233	-1.37185	-1.89739	-0.197567	-0.76992	-0.820661	-1.37642	-0.277637	-0.830774	-0.784293	-1.25052	-0.0364608	-0.225958	-0.269098	-0.885167	-0.0217037	-0.446027	-0.417195	-1.32509	0.650163	-0.25678	-0.243465	-1.2643	0.79268	-1.10584
19440	-1.26392	-1.27056	-1.99536	-0.812901	-1.3172	-1.22057	-1.36218	-0.768266	-1.41855	-1.42467	-1.90464	-0.936355	-1.0137	-1.03132	-2.48005	0.258474	0.0745037	0.0126836	-1.39724	1.03589	-0.487089	-0.501137	-2.11067	0.347506	-1.41294	-1.37806	-1.91076	-0.133387	-0.785977	-0.834519	-1.39461	-0.293954	-0.819437	-0.766933	-1.2437	-0.0155863	-0.210729	-0.251896	-0.865619	0.000696585	-0.485396	-0.437071	-1.36141	0.69972	-0.247677	-0.239404	-1.26594	0.815175	-1.11182
19480	-1.25304	-1.25606	-1.96502	-0.823961	-1.31715	-1.221	-1.37203	-0.770769	-1.42112	-1.4288	-1.91591	-0.946411	-1.01351	-1.02342	-2.47235	0.27923	0.0773136	0.0311088	-1.46459	1.02114	-0.384067	-0.393373	-2.11067	0.507884	-1.41408	-1.38456	-1.92165	-0.0692075	-0.804079	-0.850281	-1.41122	-0.314816	-0.80486	-0.748517	-1.23941	-0.00389446	-0.197298	-0.236703	-0.864054	0.0180312	-0.524011	-0.455183	-1.39772	0.741775	-0.238513	-0.234769	-1.27422	0.824275	-1.11831
19520	-1.24358	-1.24218	-1.92872	-0.82525	-1.31708	-1.221	-1.3927	-0.769616	-1.42327	-1.43301	-1.92325	-0.957709	-1.01049	-1.01205	-2.45729	0.316867	0.0739126	0.0461174	-1.53011	1.01641	-0.28164	-0.288747	-2.11067	0.667251	-1.41604	-1.39127	-1.92724	-0.00502752	-0.824013	-0.867839	-1.42822	-0.339931	-0.786618	-0.729025	-1.22809	0.0192576	-0.185453	-0.223239	-0.858444	0.0313196	-0.561233	-0.471531	-1.43399	0.769715	-0.229387	-0.229452	-1.29015	0.841254	-1.12508
19560	-1.23541	-1.22892	-1.89128	-0.815002	-1.317	-1.22046	-1.41302	-0.769352	-1.42492	-1.43708	-1.9281	-0.964752	-1.00449	-0.997968	-2.43975	0.36298	0.0652937	0.0562695	-1.57051	1.03521	-0.179931	-0.188116	-2.11067	0.8267	-1.41797	-1.39795	-1.92895	0.0591524	-0.845567	-0.887011	-1.44237	-0.361405	-0.764941	-0.708478	-1.21606	0.0269142	-0.174978	-0.211217	-0.847962	0.0531165	-0.596422	-0.485862	-1.47022	0.81245	-0.220397	-0.223386	-1.30231	0.858429	-1.13169
19600	-1.22839	-1.21634	-1.84164	-0.791212	-1.31691	-1.21931	-1.40825	-0.777605	-1.42601	-1.4407	-1.92643	-0.978352	-0.995383	-0.982037	-2.42665	0.409182	0.0524498	0.0614454	-1.59368	1.01049	-0.0790683	-0.0917803	-2.11067	0.976263	-1.41932	-1.40424	-1.96434	0.100663	-0.868526	-0.907444	-1.4539	-0.390771	-0.740062	-0.68722	-1.2028	0.0315096	-0.165659	-0.200323	-0.829667	0.0796006	-0.628938	-0.497296	-1.49995	0.838105	-0.211642	-0.216581	-1.30555	0.875681	-1.13782
19640	-1.22238	-1.20446	-1.77052	-0.751999	-1.31681	-1.21743	-1.41418	-0.769185	-1.42645	-1.44357	-1.9311	-0.983588	-0.983034	-0.9652	-2.41941	0.453962	0.0363739	0.0618257	-1.6017	0.983792	0.0208243	0.000250774	-2.11067	1.10289	-1.41966	-1.40955	-2.01988	0.0914994	-0.892676	-0.928858	-1.46803	-0.422341	-0.71221	-0.665475	-1.18837	0.0437991	-0.157283	-0.190139	-0.860098	0.111593	-0.658142	-0.505667	-1.50606	0.887796	-0.203222	-0.209035	-1.32067	0.89065	-1.14316
19680	-1.21724	-1.19339	-1.71583	-0.713447	-1.31672	-1.21477	-1.4212	-0.754655	-1.42615	-1.44546	-1.93229	-0.982963	-0.967307	-0.948723	-2.40975	0.502243	0.018059	0.0568644	-1.59915	0.969141	0.12275	0.0883253	-2.11067	1.15162	-1.41858	-1.413	-2.07208	0.0853445	-0.917805	-0.95098	-1.48219	-0.454049	-0.681618	-0.643354	-1.17489	0.0610686	-0.149635	-0.180233	-0.859478	0.135905	-0.683394	-0.510999	-1.50581	0.942679	-0.195233	-0.200757	-1.31691	0.905083	-1.14741
19720	-1.21284	-1.18391	-1.62287	-0.684746	-1.31664	-1.21125	-1.41257	-0.734604	-1.42503	-1.44616	-1.93842	-0.985706	-0.948613	-0.933268	-2.39845	0.561536	-0.00150182	0.047206	-1.58151	0.904816	0.229152	0.173262	-2.11067	1.2417	-1.41566	-1.41379	-2.12645	0.0648687	-0.943699	-0.973615	-1.49117	-0.478915	-0.648516	-0.620957	-1.17572	0.0798769	-0.142501	-0.170219	-0.858406	0.178578	-0.704054	-0.51338	-1.50006	0.998893	-0.187091	-0.19174	-1.31725	0.924342	-1.15026
19760	-1.20904	-1.17668	-1.56068	-0.664654	-1.31657	-1.20685	-1.41063	-0.727521	-1.42303	-1.44557	-1.94441	-0.991714	-0.938558	-0.919294	-2.38605	0.623269	-0.0213157	0.0340601	-1.54393	0.854152	0.338412	0.256026	-2.11067	1.33107	-1.41049	-1.41132	-2.13785	-0.027953	-0.970144	-0.996484	-1.50206	-0.502137	-0.613135	-0.598492	-1.16636	0.0989779	-0.135667	-0.159655	-0.852937	0.208941	-0.719482	-0.51324	-1.48979	1.03086	-0.178188	-0.181984	-1.32627	0.937824	-1.15141
19800	-1.2057	-1.17162	-1.49106	-0.651878	-1.31652	-1.20191	-1.40855	-0.708948	-1.42005	-1.44358	-1.96691	-0.979506	-0.940748	-0.907271	-2.3729	0.679032	-0.0403895	0.0187029	-1.48981	0.817547	0.448907	0.337009	-2.11067	1.40274	-1.40264	-1.40461	-2.17683	-0.133836	-0.996926	-1.01911	-1.50932	-0.53277	-0.575707	-0.575955	-1.17002	0.119018	-0.128919	-0.14817	-0.849165	0.24758	-0.72904	-0.510626	-1.47567	1.07067	-0.168658	-0.171813	-1.31493	0.950002	-1.15053
19840	-1.20268	-1.16863	-1.47625	-0.645034	-1.31649	-1.19725	-1.40644	-0.69025	-1.41602	-1.44013	-1.97767	-0.963692	-0.953725	-0.898029	-2.35981	0.731413	-0.0577304	0.00232336	-1.43849	0.738651	0.559017	0.416432	-2.11067	1.45836	-1.3917	-1.3929	-2.12938	-0.180421	-1.02374	-1.04124	-1.52451	-0.563408	-0.536462	-0.553472	-1.17627	0.137238	-0.122043	-0.135565	-0.847098	0.286082	-0.731863	-0.505967	-1.45843	1.09202	-0.158638	-0.161202	-1.32346	0.969415	-1.14734
19880	-1.20183	-1.16785	-1.43868	-0.64249	-1.31649	-1.1931	-1.39639	-0.674706	-1.41096	-1.43497	-1.98375	-0.945643	-0.976027	-0.894252	-2.34743	0.782432	-0.0723454	-0.0140086	-1.37858	0.678692	0.667119	0.493813	-2.11067	1.49955	-1.37726	-1.37599	-2.10028	-0.266103	-1.0485	-1.06234	-1.53259	-0.593978	-0.495632	-0.531321	-1.17967	0.155602	-0.114824	-0.12247	-0.846826	0.316647	-0.726404	-0.500766	-1.43884	1.10939	-0.148261	-0.150314	-1.33307	0.982412	-1.14151
19920	-1.20569	-1.16975	-1.41989	-0.642372	-1.31607	-1.18945	-1.38596	-0.661237	-1.40554	-1.42753	-1.99632	-0.924152	-1.0062	-0.89591	-2.34215	0.8387	-0.0832413	-0.0290804	-1.29621	0.635419	0.77159	0.568319	-2.11067	1.52281	-1.35889	-1.3541	-2.01089	-0.36658	-1.07059	-1.0816	-1.53905	-0.625441	-0.453448	-0.509436	-1.18459	0.17429	-0.107173	-0.110446	-0.847446	0.341669	-0.713372	-0.495504	-1.41765	1.12417	-0.137663	-0.139389	-1.34084	0.993999	-1.13275
19960	-1.21397	-1.17427	-1.42734	-0.641838	-1.31196	-1.18621	-1.37739	-0.654809	-1.4	-1.4181	-2.00412	-0.89734	-1.04277	-0.902427	-2.33797	0.894583	-0.0891693	-0.0422044	-1.21754	0.589959	0.87081	0.638216	-2.11067	1.53369	-1.33617	-1.32786	-1.94704	-0.45598	-1.09023	-1.09884	-1.55191	-0.645316	-0.410141	-0.487625	-1.1895	0.193491	-0.100463	-0.100024	-0.84993	0.351182	-0.693847	-0.489982	-1.39529	1.18879	-0.12698	-0.128628	-1.34046	1.00523	-1.12074
20000	-1.22634	-1.18097	-1.44213	-0.642894	-1.30389	-1.18322	-1.37003	-0.644129	-1.39447	-1.40725	-2.01561	-0.871863	-1.08429	-0.913479	-2.32906	0.94897	-0.0898479	-0.0539544	-1.14968	0.553465	0.963156	0.701555	-2.11067	1.54632	-1.3087	-1.29809	-1.94801	-0.526858	-1.10766	-1.11426	-1.56166	-0.660231	-0.365941	-0.465907	-1.20165	0.211921	-0.095104	-0.0916434	-0.852841	0.363905	-0.668906	-0.484262	-1.37356	1.24159	-0.116345	-0.118178	-1.33352	1.02033	-1.10518
20040	-1.24248	-1.1895	-1.46108	-0.633643	-1.29234	-1.18039	-1.37211	-0.630458	-1.38908	-1.39586	-2.02741	-0.842134	-1.1293	-0.928557	-2.32239	1.00114	-0.0864816	-0.0642048	-1.08882	0.518826	1.04701	0.757047	-2.11067	1.55228	-1.27735	-1.26591	-1.94654	-0.545152	-1.12312	-1.12806	-1.57189	-0.674478	-0.324086	-0.444457	-1.21245	0.233099	-0.0910607	-0.0856044	-0.845897	0.370803	-0.639629	-0.478618	-1.35201	1.2656	-0.105894	-0.108142	-1.33077	1.03536	-1.08577
20080	-1.26207	-1.19947	-1.47944	-0.625689	-1.27778	-1.17764	-1.36838	-0.630158	-1.38398	-1.38462	-2.04172	-0.809529	-1.17634	-0.947019	-2.31917	1.03688	-0.0803014	-0.0726488	-1.04235	0.497061	1.12074	0.803779	-2.11067	1.55176	-1.24525	-1.2324	-1.93902	-0.542139	-1.13685	-1.14053	-1.58716	-0.684855	-0.287774	-0.423512	-1.21718	0.255059	-0.0882999	-0.0821261	-0.827247	0.367496	-0.607094	-0.472773	-1.33188	1.26536	-0.0957616	-0.0987171	-1.3301	1.04684	-1.06218
20120	-1.28477	-1.21061	-1.49999	-0.631511	-1.2607	-1.17494	-1.37993	-0.630087	-1.3793	-1.37427	-2.05919	-0.776002	-1.22394	-0.968676	-2.32027	1.0618	-0.0725386	-0.0797149	-1.05394	0.474737	1.18273	0.841632	-2.11067	1.55839	-1.21279	-1.19825	-1.93752	-0.541945	-1.14906	-1.15197	-1.60566	-0.70561	-0.256578	-0.40301	-1.21618	0.276212	-0.0867876	-0.0812465	-0.814846	0.365236	-0.572379	-0.466445	-1.31447	1.20748	-0.0860834	-0.0901131	-1.33242	1.05855	-1.03438
20160	-1.31027	-1.22269	-1.51615	-0.634186	-1.24159	-1.17223	-1.39299	-0.627655	-1.37518	-1.36545	-2.08711	-0.742848	-1.27065	-0.993242	-2.32117	1.07159	-0.0644243	-0.0868558	-0.990959	0.460018	1.23136	0.870416	-2.11067	1.57246	-1.18025	-1.16398	-1.93615	-0.541427	-1.16001	-1.16259	-1.62382	-0.705599	-0.230066	-0.382763	-1.20774	0.301265	-0.0864902	-0.0827989	-0.822796	0.363722	-0.536563	-0.459474	-1.29807	1.18825	-0.0769942	-0.0825298	-1.33043	1.06795	-1.00319
20200	-1.33823	-1.23557	-1.53872	-0.626841	-1.22091	-1.16946	-1.40682	-0.627296	-1.37176	-1.35861	-2.12573	-0.707181	-1.31501	-1.02012	-2.32248	1.08536	-0.0571895	-0.0949627	-0.928707	0.474327	1.26501	0.889515	-2.11067	1.57418	-1.14789	-1.12978	-1.93516	-0.541427	-1.16992	-1.17264	-1.64751	-0.706752	-0.207808	-0.363168	-1.20774	0.325335	-0.0873739	-0.0867384	-0.827873	0.358649	-0.500725	-0.451729	-1.27762	1.11477	-0.0686288	-0.076214	-1.3304	1.07473	-0.968992
20240	-1.36834	-1.24937	-1.56264	-0.620992	-1.19917	-1.16662	-1.42069	-0.627855	-1.36917	-1.35402	-2.16336	-0.672317	-1.35556	-1.04876	-2.32382	1.07689	-0.0520653	-0.104674	-0.930074	0.470002	1.28426	0.899732	-2.11067	1.56811	-1.11597	-1.09576	-1.93445	-0.541427	-1.17903	-1.18229	-1.66637	-0.69836	-0.189372	-0.3446	-1.20774	0.356095	-0.089405	-0.0932521	-0.835894	0.350234	-0.465943	-0.443448	-1.2528	0.993935	-0.0611595	-0.0714342	-1.3224	1.07881	-0.932108
20280	-1.40027	-1.26413	-1.58907	-0.610998	-1.17683	-1.16352	-1.43363	-0.628161	-1.36755	-1.3521	-2.21396	-0.63858	-1.39089	-1.07855	-2.3252	1.05715	-0.050283	-0.116468	-0.910987	0.474521	1.30056	0.901982	-2.11067	1.55719	-1.08476	-1.06209	-1.82266	-0.541427	-1.18758	-1.19153	-1.69474	-0.691251	-0.174328	-0.326899	-1.20684	0.38932	-0.0925495	-0.102484	-0.845402	0.34255	-0.433295	-0.434707	-1.22531	0.863237	-0.0548208	-0.0685868	-1.32352	1.08067	-0.892855
20320	-1.4337	-1.27967	-1.61687	-0.60335	-1.15437	-1.15946	-1.44516	-0.622726	-1.36704	-1.35323	-2.27177	-0.598358	-1.42456	-1.10932	-2.32658	1.02881	-0.0530736	-0.130826	-0.898423	0.478611	1.31567	0.897247	-2.11067	1.54823	-1.05452	-1.02897	-1.63263	-0.541427	-1.1958	-1.20034	-1.72051	-0.664144	-0.162245	-0.310208	-1.20539	0.445487	-0.0967739	-0.114513	-0.845128	0.333315	-0.403861	-0.425357	-1.19618	0.739577	-0.0496353	-0.0678561	-1.31897	1.08228	-0.851552
20360	-1.4683	-1.29574	-1.649	-0.595492	-1.13229	-1.15425	-1.44884	-0.61965	-1.36777	-1.35771	-2.35059	-0.561609	-1.45912	-1.14267	-2.32796	0.992859	-0.0616682	-0.147979	-0.884249	0.487213	1.32949	0.887061	-2.11067	1.64962	-1.02552	-0.996573	-1.54458	-0.541427	-1.20391	-1.20858	-1.74722	-0.661308	-0.152692	-0.295588	-1.20584	0.473204	-0.102044	-0.12864	-0.858458	0.317187	-0.378719	-0.415576	-1.1666	0.734449	-0.0456048	-0.0692584	-1.31935	1.08193	-0.808517
20400	-1.50374	-1.31198	-1.67937	-0.591242	-1.11107	-1.1481	-1.4559	-0.613958	-1.36988	-1.36537	-2.44389	-0.529496	-1.49426	-1.17925	-2.32934	0.950178	-0.0772979	-0.166771	-0.861703	0.46848	1.34189	0.872877	-2.11067	1.78369	-0.998016	-0.96515	-1.5016	-0.541427	-1.21206	-1.21552	-1.76784	-0.653006	-0.145238	-0.283612	-1.20675	0.49796	-0.108327	-0.142777	-0.870995	0.303063	-0.358947	-0.405706	-1.13803	0.680143	-0.0427309	-0.0727637	-1.31861	1.08194	-0.764071
20440	-1.53814	-1.32833	-1.71711	-0.589934	-1.09117	-1.14112	-1.46863	-0.611017	-1.37267	-1.37587	-2.55132	-0.501689	-1.52968	-1.21938	-2.33072	0.871969	-0.101194	-0.186485	-0.912206	0.451895	1.35278	0.85487	-2.11067	1.85954	-0.972285	-0.934745	-1.45748	-0.541427	-1.21858	-1.2205	-1.78459	-0.636175	-0.139451	-0.274552	-1.20779	0.506491	-0.115588	-0.155765	-0.877918	0.307206	-0.343728	-0.396339	-1.13733	0.643441	-0.0410155	-0.0783791	-1.31698	1.07765	-0.718531
20480	-1.57013	-1.34465	-1.75408	-0.589268	-1.07486	-1.13338	-1.48054	-0.61037	-1.3746	-1.38904	-2.65553	-0.477056	-1.56509	-1.26316	-2.3321	0.654396	-0.134587	-0.207801	-0.974761	0.420719	1.36202	0.833944	-2.11067	1.85919	-0.948586	-0.905599	-1.41257	-0.541427	-1.223	-1.22316	-1.79891	-0.609869	-0.134902	-0.268547	-1.21225	0.517589	-0.123794	-0.167346	-0.886124	0.303134	-0.329603	-0.388012	-1.1156	0.54749	-0.04046	-0.0861167	-1.31557	1.07515	-0.672218
20520	-1.59973	-1.36123	-1.79553	-0.586191	-1.06592	-1.12511	-1.49177	-0.608299	-1.37574	-1.40436	-2.76465	-0.468797	-1.60019	-1.3104	-2.33347	0.406645	-0.176738	-0.229419	-1.0345	0.407829	1.3695	0.811753	-2.11067	1.79646	-0.927184	-0.878033	-1.36721	-0.541427	-1.22554	-1.22346	-1.814	-0.585107	-0.131158	-0.265668	-1.24009	0.533981	-0.132948	-0.177371	-0.898107	0.304631	-0.316443	-0.381328	-1.13092	0.563173	-0.0410663	-0.0959764	-1.31601	1.07141	-0.62545
20560	-1.62696	-1.37804	-1.83717	-0.581532	-1.06355	-1.11662	-1.51576	-0.592879	-1.37622	-1.42151	-2.87917	-0.462413	-1.63468	-1.3605	-2.33481	0.353216	-0.216648	-0.248138	-1.08964	0.43408	1.37512	0.790182	-2.11067	1.6852	-0.907193	-0.852367	-1.30854	-0.541427	-1.22641	-1.22152	-1.83432	-0.563585	-0.12779	-0.265398	-1.2418	0.54434	-0.142928	-0.185692	-0.902662	0.325086	-0.304235	-0.376808	-1.15243	0.57697	-0.0428361	-0.107798	-1.33483	1.06849	-0.578546
20600	-1.65186	-1.39473	-1.8802	-0.58257	-1.06673	-1.10812	-1.53188	-0.585662	-1.37613	-1.44005	-2.99068	-0.448439	-1.66827	-1.41241	-2.33602	0.364172	-0.252549	-0.262657	-1.13955	0.569736	1.37875	0.770289	-2.11067	1.53939	-0.887917	-0.828825	-1.26169	-0.541427	-1.22584	-1.21756	-1.86317	-0.5395	-0.124658	-0.267289	-1.2418	0.549354	-0.153506	-0.192171	-0.910386	0.350106	-0.292966	-0.374822	-1.29037	0.611393	-0.0457709	-0.12143	-1.35768	1.06371	-0.531825
20640	-1.67443	-1.41096	-1.92192	-0.582702	-1.07446	-1.09984	-1.55942	-0.581682	-1.37561	-1.45953	-3.09479	-0.441827	-1.70065	-1.46503	-2.33708	0.372915	-0.284601	-0.272039	-1.20628	0.72897	1.38029	0.750958	-2.11067	1.54119	-0.869802	-0.807579	-1.21794	-0.541427	-1.22404	-1.21182	-1.86866	-0.515898	-0.122848	-0.271398	-1.24181	0.548094	-0.164453	-0.196757	-0.915864	0.378246	-0.282624	-0.375464	-1.29055	0.651457	-0.0498726	-0.13671	-1.36719	1.05783	-0.485606
20680	-1.69472	-1.42601	-1.9652	-0.566104	-1.08575	-1.09196	-1.57617	-0.573327	-1.37477	-1.47956	-3.20422	-0.433694	-1.73153	-1.51784	-2.33822	0.387103	-0.312961	-0.276574	-1.27199	0.845932	1.37961	0.731494	-2.11067	1.57327	-0.853293	-0.789035	-1.17815	-0.541427	-1.22124	-1.20441	-1.88525	-0.495142	-0.122423	-0.277466	-1.26202	0.547118	-0.175541	-0.199357	-0.919054	0.416531	-0.273195	-0.378613	-1.25882	0.680637	-0.0551428	-0.15346	-1.37714	1.0515	-0.440208
20720	-1.71273	-1.4399	-2.00819	-0.541756	-1.09959	-1.08465	-1.58706	-0.561708	-1.37371	-1.49997	-3.30695	-0.435638	-1.76061	-1.57015	-2.33925	0.403027	-0.337789	-0.277468	-1.34029	1.04493	1.3766	0.712202	-2.11067	1.61365	-0.838836	-0.773553	-1.13711	-0.541427	-1.21764	-1.19554	-1.90295	-0.482075	-0.123278	-0.285005	-1.29612	0.549736	-0.186541	-0.199786	-0.928947	0.461972	-0.264666	-0.383399	-1.24307	0.69811	-0.0615832	-0.17147	-1.42057	1.04054	-0.396162
20760	-1.72849	-1.45278	-2.05005	-0.512118	-1.11498	-1.07741	-1.64368	-0.54665	-1.37257	-1.52063	-3.40771	-0.437843	-1.78759	-1.62107	-2.34132	0.417635	-0.359243	-0.275971	-1.4045	1.25031	1.37115	0.69362	-2.11067	1.65547	-0.826875	-0.761487	-1.09783	-0.541427	-1.21348	-1.1862	-1.90993	-0.462374	-0.125312	-0.293873	-1.34475	0.549315	-0.197225	-0.197811	-0.931386	0.500713	-0.257025	-0.389054	-1.28469	0.693573	-0.0691432	-0.190312	-1.47084	1.03542	-0.358927
20800	-1.74204	-1.46447	-2.09064	-0.473305	-1.13092	-1.06826	-1.66623	-0.519754	-1.37144	-1.5414	-3.52278	-0.428303	-1.81218	-1.66897	-2.34283	0.416014	-0.377482	-0.272845	-1.45443	1.5133	1.36313	0.676551	-2.11067	1.69676	-0.817858	-0.75345	-1.06477	-0.541427	-1.20896	-1.17742	-1.92638	-0.447221	-0.128419	-0.303361	-1.35364	0.548965	-0.207363	-0.193326	-0.928528	0.540489	-0.250258	-0.395385	-1.29438	0.652269	-0.0761394	-0.208824	-1.53057	1.03198	-0.330783
20840	-1.75338	-1.47472	-2.13044	-0.436402	-1.1464	-1.05572	-1.69739	-0.476549	-1.37046	-1.56245	-3.63279	-0.424391	-1.83407	-1.70966	-2.34354	0.394236	-0.392665	-0.269079	-1.52725	1.84715	1.35121	0.661769	-2.11067	1.73133	-0.812228	-0.750483	-1.03728	-0.541278	-1.20431	-1.16993	-1.93791	-0.443652	-0.132498	-0.312888	-1.37599	0.547941	-0.216728	-0.186305	-0.913736	0.578389	-0.244354	-0.399115	-1.29878	0.591746	-0.0817445	-0.225807	-1.58176	1.02944	-0.311726
20880	-1.76256	-1.48272	-2.16665	-0.396141	-1.16043	-1.03976	-1.70973	-0.412338	-1.36973	-1.58822	-3.73073	-0.426367	-1.85027	-1.74022	-2.34451	0.375804	-0.40495	-0.265642	-1.57022	2.11994	1.33459	0.649443	-2.11067	1.76029	-0.810431	-0.752873	-1.0133	-0.541427	-1.19975	-1.16524	-1.94201	-0.439546	-0.137444	-0.322251	-1.38361	0.551864	-0.225091	-0.177014	-0.905933	0.607236	-0.239298	-0.397123	-1.3229	0.541408	-0.0859333	-0.240725	-1.65204	1.02794	-0.301753
20920	-1.76958	-1.48802	-2.20105	-0.356737	-1.172	-1.0202	-1.70969	-0.315227	-1.36937	-1.62291	-3.79056	-0.421925	-1.85828	-1.76024	-2.34727	0.355412	-0.414496	-0.263404	-1.64272	2.36236	1.31358	0.638154	-2.14906	1.78412	-0.812914	-0.760451	-1.08185	-0.541426	-1.19549	-1.16461	-1.96054	-0.438389	-0.143153	-0.330986	-1.38079	0.554403	-0.232223	-0.165855	-0.89401	0.615557	-0.235079	-0.389024	-1.34074	0.488647	-0.0886809	-0.253337	-1.72049	1.02807	-0.30086
20960	-1.77446	-1.49089	-2.23336	-0.322644	-1.18011	-0.997133	-1.70974	-0.190773	-1.36951	-1.66607	-3.87265	-0.422334	-1.85859	-1.76899	-2.36362	0.385315	-0.421463	-0.264491	-1.72979	2.65321	1.28849	0.628165	-2.28481	1.80318	-0.82012	-0.772932	-1.21809	-0.541427	-1.19188	-1.16817	-1.98813	-0.440574	-0.149524	-0.338398	-1.37343	0.559204	-0.237896	-0.15298	-0.890113	0.622601	-0.231683	-0.375484	-1.4014	0.441367	-0.0899622	-0.263737	-1.79245	1.02765	-0.309041
21000	-1.77666	-1.4919	-2.26398	-0.301211	-1.1838	-0.970908	-1.70956	-0.0460627	-1.37087	-1.71754	-4.06604	-0.419707	-1.85167	-1.76573	-2.45748	0.411869	-0.426007	-0.270848	-1.80741	2.99075	1.25964	0.620233	-2.41816	1.81626	-0.832497	-0.790103	-1.17589	-0.541427	-1.19068	-1.1756	-2.01646	-0.432048	-0.156451	-0.3438	-1.35841	0.561455	-0.241882	-0.138597	-0.891813	0.637196	-0.229113	-0.356751	-1.44229	0.532106	-0.0897523	-0.272171	-1.85682	1.03352	-0.326294
[truncated: 3 more columns]

## Sheet: Comp hw400-yr
binhw: 20-yr | hw: 400-yr	SAn AP z-scores				SAn charcoal influx z-scores				SESA AP z-scores				SESA charcoal influx z-scores				CEB AP z-scores				CEB charcoal influx z-scores				NEB AP z-scores				TrAn AP z-scores				TrAn charcoal influx z-scores				Amazonia AP z-scores				Amazonia charcoal influx z-scores				NNeo AP z-scores				NNeo charcoal influx z-scores
Age (yr BP)	LocFit	Mean (of boot)	c0.025	c0.975	LocFit	Mean (of boot)	c0.025	c0.975	LocFit	Mean (of boot)	c0.025	c0.975	LocFit	Mean (of boot)	c0.025	c0.975	LocFit	Mean (of boot)	c0.025	c0.975	LocFit	Mean (of boot)	c0.025	c0.975	LocFit	Mean (of boot)	c0.025	c0.975	LocFit	Mean (of boot)	c0.025	c0.975	LocFit	Mean (of boot)	c0.025	c0.975	LocFit	Mean (of boot)	c0.025	c0.975	LocFit	Mean (of boot)	c0.025	c0.975	LocFit	Mean (of boot)	c0.025	c0.975	LocFit
0	0.00095722	-0.0244902	-0.794867	0.649501	0.201883	0.194999	-0.311161	0.672675	0.945617	0.917008	0.31574	1.2243	-0.111218	-0.053628	-0.647811	0.865732	0.519235	0.424124	-0.356087	0.946976	-0.528905	-0.449058	-2.15638	0.66601	0.288461	-0.133362	-2.13114	1.30023	0.174822	0.172946	-0.173317	0.522403	-0.155087	-0.173283	-0.797165	0.567242	0.706507	0.704822	0.161424	1.13474	-0.21769	-0.234393	-0.805611	0.413325	0.252859	0.252912	-0.26389	0.903502	-0.624042
40	0.010833	0.00152886	-0.712583	0.631868	0.195548	0.193787	-0.283153	0.649595	0.947876	0.925049	0.368297	1.21351	-0.110394	-0.058274	-0.644796	0.815372	0.528234	0.426824	-0.358613	0.921848	-0.522757	-0.466534	-2.06288	0.435299	0.280276	-0.204312	-2.13114	0.937568	0.170255	0.16896	-0.166522	0.505241	-0.154425	-0.172941	-0.796965	0.524302	0.705093	0.705367	0.203879	1.11278	-0.216313	-0.234683	-0.782506	0.386567	0.257787	0.261979	-0.225486	0.885568	-0.626575
80	0.0393319	0.0411183	-0.635253	0.646616	0.180595	0.183658	-0.297362	0.638064	0.955593	0.937118	0.41934	1.20697	-0.105256	-0.0597958	-0.621988	0.762747	0.543311	0.441918	-0.341509	0.908981	-0.535701	-0.491887	-2.00898	0.359099	0.270275	-0.254254	-2.13114	0.627865	0.158321	0.158762	-0.168398	0.481869	-0.150518	-0.168205	-0.797801	0.49389	0.708094	0.708169	0.21347	1.10317	-0.212593	-0.232794	-0.7619	0.344057	0.272089	0.27712	-0.195099	0.879539	-0.628438
120	0.0854155	0.0929171	-0.547853	0.652425	0.159153	0.16546	-0.31736	0.624312	0.968584	0.952499	0.488115	1.20331	-0.0968551	-0.0582198	-0.588002	0.70601	0.563165	0.467457	-0.306139	0.917215	-0.563293	-0.525456	-1.95486	0.374595	0.254536	-0.289262	-2.13114	0.410395	0.139462	0.141407	-0.171754	0.455167	-0.143385	-0.158221	-0.780431	0.467142	0.714181	0.712041	0.237087	1.10297	-0.20666	-0.228999	-0.74355	0.318605	0.295827	0.296836	-0.159468	0.880096	-0.626793
160	0.148045	0.15561	-0.434805	0.668826	0.133354	0.140913	-0.350387	0.628133	0.986518	0.970203	0.552429	1.19402	-0.0862435	-0.0533343	-0.521707	0.624719	0.586493	0.500712	-0.284252	0.922662	-0.601087	-0.563052	-1.8737	0.390795	0.231778	-0.311542	-2.13114	0.410373	0.11412	0.116325	-0.194685	0.418366	-0.133315	-0.14219	-0.742829	0.44627	0.717093	0.715844	0.242476	1.1037	-0.198648	-0.223403	-0.733145	0.320822	0.324967	0.319841	-0.135598	0.892161	-0.620278
200	0.218603	0.222309	-0.317349	0.703834	0.105327	0.11308	-0.391718	0.618569	1.00574	0.988218	0.609327	1.19326	-0.0744719	-0.0455389	-0.448996	0.552594	0.613191	0.538544	-0.235443	0.922099	-0.644638	-0.601097	-1.81937	0.410941	0.222965	-0.321924	-2.13875	0.458581	0.0827377	0.0848629	-0.227093	0.375166	-0.120257	-0.122272	-0.695034	0.430406	0.716485	0.718013	0.246186	1.11397	-0.188731	-0.215041	-0.720592	0.303859	0.348934	0.343222	-0.121242	0.898493	-0.607557
240	0.284633	0.285004	-0.207626	0.727933	0.0770782	0.0847999	-0.42592	0.599657	1.02397	1.00469	0.661545	1.19529	-0.0630938	-0.0370839	-0.389827	0.491868	0.646248	0.579421	-0.149888	0.945922	-0.6895	-0.640759	-1.81927	0.42441	0.228763	-0.32199	-2.15302	0.525441	0.0457578	0.0495044	-0.264444	0.329482	-0.103683	-0.100877	-0.627623	0.43471	0.71233	0.7171	0.24431	1.12078	-0.176143	-0.202312	-0.693629	0.30602	0.366598	0.361575	-0.0888631	0.892219	-0.587294
280	0.343523	0.339528	-0.125631	0.740639	0.0498707	0.0571133	-0.458065	0.593651	1.0402	1.01867	0.693779	1.19177	-0.0546991	-0.0286531	-0.344565	0.481704	0.683177	0.622948	-0.0609013	0.970866	-0.731445	-0.683631	-1.84123	0.41878	0.243302	-0.313147	-2.15993	0.594385	0.00368479	0.0113381	-0.290076	0.290004	-0.0830667	-0.0777103	-0.57743	0.411619	0.704601	0.712734	0.243973	1.12206	-0.159568	-0.184154	-0.655913	0.304544	0.377314	0.373299	-0.0778271	0.877009	-0.558155
320	0.392725	0.382628	-0.0611588	0.761818	0.0249144	0.0309834	-0.489151	0.547606	1.0534	1.02923	0.731058	1.19575	-0.048668	-0.0204599	-0.310225	0.458873	0.720879	0.667416	0.043454	0.99064	-0.777605	-0.729029	-1.88057	0.416138	0.260709	-0.30112	-2.15291	0.65852	-0.0396973	-0.028305	-0.319261	0.245353	-0.0578815	-0.0516603	-0.503074	0.400539	0.69327	0.704531	0.244012	1.12249	-0.137686	-0.159511	-0.623501	0.309085	0.38044	0.377855	-0.0750896	0.877407	-0.518804
360	0.429692	0.413009	-0.0124246	0.76915	0.00344353	0.00767477	-0.508549	0.49804	1.06256	1.03553	0.776756	1.1909	-0.0440115	-0.0127165	-0.288841	0.434163	0.756253	0.710447	0.1545	1.00801	-0.827934	-0.772871	-1.86705	0.405955	0.275112	-0.293093	-2.12626	0.702076	-0.0817182	-0.0690871	-0.344532	0.193121	-0.0276007	-0.0217396	-0.434207	0.387135	0.67831	0.691903	0.252135	1.10583	-0.109181	-0.128192	-0.585978	0.343332	0.37533	0.374974	-0.0695762	0.867815	-0.467968
400	0.451876	0.430603	0.02145	0.768195	-0.013308	-0.0112235	-0.504192	0.438417	1.06666	1.03712	0.77217	1.18552	-0.0397408	-0.00608164	-0.270789	0.420614	0.7862	0.748706	0.278095	1.02023	-0.874924	-0.808216	-1.81315	0.41644	0.28064	-0.292975	-2.06466	0.716601	-0.121478	-0.110888	-0.371643	0.133349	0.00830239	0.0124969	-0.369778	0.367445	0.659759	0.674209	0.259691	1.07407	-0.0727334	-0.0905585	-0.531509	0.375839	0.36135	0.364595	-0.066122	0.839648	-0.408384
440	0.456731	0.439721	0.0442461	0.765086	-0.024106	-0.0239315	-0.487948	0.38299	1.06514	1.03421	0.748911	1.17709	-0.034867	-0.00186393	-0.262514	0.408253	0.807622	0.777153	0.381919	1.02287	-0.911067	-0.827955	-1.72992	0.421837	0.273588	-0.301771	-2.00381	0.701841	-0.158079	-0.152015	-0.404979	0.0829992	0.0469846	0.0485784	-0.299882	0.390944	0.638132	0.65174	0.250263	1.04633	-0.0270263	-0.0480522	-0.466778	0.409179	0.342316	0.347669	-0.0853154	0.83312	-0.344093
480	0.454022	0.446433	0.0666384	0.769474	-0.0277166	-0.0289618	-0.473727	0.351194	1.06152	1.02815	0.682924	1.17391	-0.0284011	0.000211204	-0.262409	0.401701	0.81736	0.791362	0.478073	1.01239	-0.928856	-0.825688	-1.60958	0.422355	0.254888	-0.316537	-1.93614	0.665264	-0.19062	-0.188767	-0.436292	0.0353409	0.0811378	0.0824072	-0.255493	0.431438	0.614004	0.627082	0.254711	1.01961	0.0265464	-0.00349508	-0.419759	0.445652	0.32197	0.326802	-0.105301	0.806886	-0.277838
520	0.455365	0.452209	0.0752624	0.765577	-0.023385	-0.026417	-0.464472	0.345004	1.05684	1.01989	0.610722	1.16871	-0.0201016	0.000682505	-0.275756	0.397786	0.813548	0.790552	0.546536	0.97994	-0.920784	-0.799833	-1.49527	0.423853	0.225743	-0.331874	-1.8665	0.610451	-0.218202	-0.219733	-0.456434	-0.0102761	0.110224	0.111717	-0.207218	0.466314	0.587924	0.601423	0.257376	0.975715	0.0782826	0.0415748	-0.362649	0.470775	0.300627	0.303292	-0.12028	0.758477	-0.212359
560	0.459842	0.458757	0.0916595	0.766818	-0.0117136	-0.016462	-0.451089	0.354706	1.05124	1.0102	0.563541	1.16833	-0.0140199	-0.000333039	-0.29657	0.394628	0.797612	0.775524	0.570804	0.955506	-0.879343	-0.752277	-1.41634	0.422178	0.18736	-0.343192	-1.80192	0.554477	-0.239878	-0.243016	-0.461048	-0.0366852	0.133964	0.13463	-0.176825	0.492801	0.560445	0.575237	0.262574	0.929042	0.125663	0.0849487	-0.304138	0.500263	0.278603	0.278188	-0.132133	0.724543	-0.150398
600	0.466532	0.465787	0.109653	0.775112	0.00698972	0.000562936	-0.440432	0.40549	1.04482	0.999636	0.489255	1.16961	-0.0113385	-0.00254195	-0.319731	0.394866	0.77133	0.748316	0.532204	0.926102	-0.81226	-0.686084	-1.33228	0.429878	0.140944	-0.351923	-1.73982	0.52536	-0.253176	-0.257793	-0.463468	-0.0610024	0.152077	0.150798	-0.166763	0.520073	0.532119	0.548321	0.261552	0.886872	0.166955	0.125048	-0.252628	0.522909	0.256213	0.252768	-0.136735	0.68904	-0.0946955
640	0.474512	0.472277	0.132701	0.784357	0.0324402	0.0241892	-0.417086	0.439547	1.03771	0.988452	0.41419	1.16916	-0.012555	-0.0057994	-0.348042	0.396118	0.736481	0.711243	0.488368	0.902678	-0.739054	-0.607323	-1.22079	0.453592	0.0877	-0.363718	-1.67641	0.478122	-0.257994	-0.263972	-0.466037	-0.0745337	0.164284	0.16044	-0.166072	0.543825	0.503496	0.519922	0.237916	0.852097	0.200428	0.159957	-0.218208	0.54282	0.233773	0.228046	-0.158134	0.651702	-0.047994
680	0.482861	0.478094	0.152362	0.788011	0.0643531	0.0540862	-0.395246	0.500502	1.03003	0.976104	0.362114	1.17261	-0.0181668	-0.0113292	-0.37978	0.405828	0.694843	0.667353	0.434622	0.872922	-0.662899	-0.525125	-1.09457	0.463022	0.0280879	-0.383281	-1.60951	0.41048	-0.25558	-0.261961	-0.466958	-0.0840048	0.170304	0.165386	-0.165622	0.546505	0.475043	0.489414	0.189417	0.814512	0.22435	0.187446	-0.194716	0.563238	0.211791	0.205125	-0.181545	0.618096	-0.0124309
720	0.490658	0.484005	0.167537	0.793564	0.102444	0.0901141	-0.366673	0.560166	1.02149	0.959865	0.300097	1.17321	-0.0286711	-0.0220656	-0.411787	0.416856	0.648195	0.620967	0.380503	0.842398	-0.586871	-0.448823	-0.982141	0.465949	-0.0397798	-0.412298	-1.5308	0.332501	-0.247178	-0.253429	-0.460954	-0.0777371	0.170752	0.167857	-0.160015	0.530265	0.446519	0.457256	0.136132	0.782711	0.236989	0.204398	-0.17586	0.56538	0.19225	0.185092	-0.204203	0.59008	0.0154063
760	0.497484	0.489799	0.178762	0.784898	0.146427	0.131184	-0.342131	0.627603	1.01055	0.939703	0.223593	1.17692	-0.0445655	-0.0382316	-0.446645	0.417295	0.598739	0.576008	0.330631	0.807144	-0.514046	-0.383994	-0.879083	0.457079	-0.116152	-0.447344	-1.44592	0.244644	-0.234035	-0.239909	-0.457684	-0.0569039	0.169734	0.168759	-0.154788	0.510568	0.418455	0.425332	0.0770535	0.753672	0.237109	0.21105	-0.167691	0.581887	0.174293	0.167202	-0.232542	0.563679	0.0380955
800	0.503214	0.494933	0.194518	0.768415	0.193498	0.175853	-0.296246	0.678016	0.997611	0.917515	0.143624	1.17699	-0.0651152	-0.0590521	-0.486236	0.427675	0.555542	0.535812	0.298143	0.769808	-0.447502	-0.332231	-0.800178	0.407246	-0.201099	-0.48187	-1.36073	0.157341	-0.217398	-0.223275	-0.446025	-0.0388435	0.168398	0.168591	-0.140956	0.497643	0.39162	0.395458	0.0194346	0.726654	0.231345	0.209344	-0.177051	0.585156	0.15627	0.150055	-0.260306	0.53499	0.0575148
840	0.507484	0.498572	0.206456	0.755819	0.239816	0.22285	-0.246315	0.718391	0.983353	0.89511	0.0800798	1.17269	-0.0814193	-0.0835169	-0.551292	0.432554	0.522413	0.504063	0.289743	0.727938	-0.390313	-0.294894	-0.725763	0.32035	-0.294691	-0.516701	-1.28043	0.0525459	-0.198562	-0.205103	-0.434823	-0.0112337	0.167442	0.167675	-0.145628	0.487435	0.366779	0.368654	-0.0217635	0.705495	0.223013	0.201126	-0.181603	0.56783	0.136531	0.131503	-0.282989	0.493532	0.0755428
880	0.509929	0.500121	0.227068	0.73678	0.284246	0.270775	-0.184223	0.745786	0.968455	0.873513	0.0245277	1.16893	-0.0925069	-0.110307	-0.609659	0.431852	0.500327	0.484851	0.288312	0.707016	-0.348549	-0.27315	-0.681579	0.19768	-0.396996	-0.556948	-1.21473	-0.0639176	-0.18032	-0.1864	-0.414209	0.0140557	0.167569	0.166563	-0.142017	0.473647	0.344701	0.345596	-0.0750559	0.69284	0.213065	0.189079	-0.192542	0.563578	0.113424	0.109578	-0.307858	0.471367	0.0940577
920	0.510185	0.499881	0.247582	0.717102	0.325662	0.317621	-0.13132	0.767067	0.953592	0.85262	-0.0401914	1.16742	-0.0994753	-0.136165	-0.66303	0.431217	0.490262	0.480559	0.28017	0.68594	-0.330507	-0.268126	-0.64324	0.103068	-0.507758	-0.608533	-1.16207	-0.19105	-0.163658	-0.167922	-0.396651	0.0444974	0.169476	0.166397	-0.132693	0.461084	0.326153	0.326304	-0.0953336	0.678929	0.202454	0.175228	-0.210109	0.549234	0.0853003	0.0823292	-0.328539	0.421215	0.114938
960	0.507887	0.49901	0.269605	0.698323	0.362935	0.359448	-0.0866124	0.782994	0.939442	0.828327	-0.0859713	1.16207	-0.103422	-0.153631	-0.713558	0.436254	0.493193	0.489536	0.284341	0.682921	-0.332462	-0.278349	-0.638404	0.0879603	-0.620635	-0.674454	-1.11615	-0.349007	-0.148473	-0.150026	-0.37942	0.0771175	0.173866	0.168281	-0.127655	0.455931	0.311905	0.309357	-0.0959255	0.663531	0.192131	0.162048	-0.224364	0.535526	0.0514357	0.0480828	-0.348898	0.395518	0.140062
1000	0.502736	0.498317	0.293889	0.6852	0.394939	0.394374	-0.0497874	0.809496	0.923034	0.800211	-0.116989	1.1553	-0.105444	-0.16113	-0.741678	0.443304	0.510098	0.506437	0.296897	0.686363	-0.349996	-0.29965	-0.659968	0.113437	-0.73079	-0.753402	-1.09138	-0.5272	-0.134661	-0.132926	-0.362703	0.101457	0.180922	0.17144	-0.143224	0.451409	0.302454	0.29507	-0.0989022	0.64553	0.183048	0.151017	-0.244631	0.523745	0.0143	0.00803241	-0.377168	0.366612	0.168583
1040	0.499217	0.499118	0.305373	0.685049	0.420566	0.421569	-0.030542	0.835652	0.896044	0.77038	-0.147579	1.14553	-0.10664	-0.160748	-0.762933	0.446775	0.541787	0.527889	0.31025	0.707084	-0.378692	-0.328484	-0.707235	0.13999	-0.835098	-0.838987	-1.08659	-0.694592	-0.122117	-0.116922	-0.35447	0.123585	0.185776	0.174545	-0.144073	0.447381	0.297448	0.285097	-0.0929037	0.629622	0.176157	0.143695	-0.269694	0.522489	-0.0253701	-0.0363322	-0.409496	0.320667	0.193389
1080	0.499461	0.502301	0.302287	0.688634	0.440843	0.440775	-0.00818137	0.846565	0.860415	0.740789	-0.162788	1.13543	-0.108047	-0.154782	-0.768032	0.461753	0.576035	0.550944	0.325052	0.725711	-0.414133	-0.36174	-0.73901	0.178742	-0.930433	-0.925082	-1.09561	-0.80799	-0.110738	-0.102496	-0.344767	0.136035	0.187154	0.176718	-0.127792	0.452329	0.296379	0.281124	-0.060085	0.614125	0.175594	0.141812	-0.274165	0.51153	-0.0670497	-0.0834452	-0.438189	0.275346	0.212121
1120	0.502356	0.507885	0.310798	0.692728	0.456959	0.452246	0.00176541	0.858017	0.818674	0.712341	-0.169005	1.12586	-0.10994	-0.145716	-0.773013	0.515288	0.604714	0.572531	0.330079	0.755364	-0.451902	-0.395575	-0.787338	0.219984	-1.01367	-1.00007	-1.14339	-0.772743	-0.100448	-0.0902162	-0.345033	0.148598	0.18518	0.177162	-0.107995	0.44148	0.298741	0.284409	-0.025183	0.605678	0.184162	0.147503	-0.267853	0.525153	-0.110214	-0.131956	-0.456745	0.243207	0.222732
1160	0.506789	0.515187	0.319874	0.698635	0.469048	0.456966	0.00336312	0.87795	0.773348	0.684771	-0.165564	1.10895	-0.112625	-0.137131	-0.778425	0.568225	0.627705	0.591137	0.340667	0.789274	-0.486121	-0.425081	-0.858165	0.274456	-1.08168	-1.05506	-1.22015	-0.744299	-0.0920416	-0.0807	-0.345278	0.148582	0.179977	0.175373	-0.0930227	0.429526	0.304027	0.295295	0.00792857	0.601853	0.200112	0.161691	-0.241269	0.523526	-0.154337	-0.180653	-0.497733	0.188956	0.223175
1200	0.511647	0.52129	0.324513	0.717189	0.477241	0.458567	-0.00212182	0.879203	0.726965	0.654466	-0.169814	1.08624	-0.116527	-0.133856	-0.778088	0.602503	0.64489	0.605793	0.330679	0.818311	-0.504999	-0.444495	-0.927681	0.337529	-1.13103	-1.09007	-1.23247	-0.715836	-0.0857679	-0.0743237	-0.348407	0.153491	0.171665	0.171602	-0.0853155	0.418004	0.31173	0.308397	0.0274873	0.610712	0.221693	0.182645	-0.209556	0.540244	-0.198895	-0.227346	-0.54	0.168729	0.211402
1240	0.515819	0.523971	0.333607	0.719089	0.481673	0.459284	-0.00482915	0.889585	0.68205	0.621298	-0.159211	1.06502	-0.122073	-0.136517	-0.786686	0.630116	0.656151	0.616105	0.327569	0.84689	-0.509066	-0.450623	-0.987686	0.342516	-1.15957	-1.10651	-1.26892	-0.674218	-0.081425	-0.070959	-0.33328	0.169214	0.160369	0.166256	-0.0758942	0.424055	0.321341	0.318717	0.0349086	0.62786	0.247156	0.20788	-0.188704	0.552898	-0.241107	-0.269033	-0.59124	0.142384	0.185366
1280	0.518111	0.521525	0.335623	0.712963	0.482475	0.460155	-0.0135773	0.892109	0.639057	0.587525	-0.143756	1.03628	-0.129687	-0.143985	-0.779383	0.650464	0.661369	0.621885	0.313523	0.864381	-0.501066	-0.444562	-1.02663	0.346091	-1.16642	-1.10411	-1.29455	-0.623829	-0.0788107	-0.0698206	-0.324655	0.176269	0.146322	0.159952	-0.0716327	0.433676	0.329033	0.325269	0.0186286	0.643301	0.274748	0.234055	-0.15212	0.572139	-0.27718	-0.302482	-0.631043	0.116023	0.143024
1320	0.515184	0.51358	0.336486	0.707792	0.479858	0.460998	-0.0111091	0.887609	0.597132	0.555614	-0.114014	1.00087	-0.139795	-0.155015	-0.782565	0.640087	0.660425	0.62325	0.299032	0.872477	-0.483742	-0.430549	-1.04615	0.352966	-1.15068	-1.08092	-1.30407	-0.586668	-0.0777227	-0.0699657	-0.312249	0.177216	0.134471	0.153593	-0.0947423	0.443976	0.332391	0.32826	0.00110821	0.661106	0.302718	0.259078	-0.115614	0.584442	-0.305582	-0.324868	-0.666784	0.129347	0.0923372
1360	0.506627	0.500631	0.321349	0.688191	0.475034	0.461206	-0.0130103	0.881943	0.558625	0.528053	-0.0708242	0.975384	-0.153166	-0.168793	-0.79527	0.618963	0.655615	0.620503	0.285137	0.871002	-0.459838	-0.414815	-1.02483	0.317483	-1.11149	-1.03586	-1.29441	-0.579766	-0.0779587	-0.0710176	-0.313276	0.175208	0.127297	0.148474	-0.114792	0.452338	0.33255	0.328508	-0.0183346	0.678036	0.328531	0.281305	-0.0818627	0.59163	-0.324786	-0.333749	-0.680982	0.142621	0.043365
1400	0.493649	0.483414	0.305777	0.669676	0.467667	0.459441	-0.00905208	0.868083	0.525927	0.506777	-0.0194044	0.951318	-0.174411	-0.186486	-0.805359	0.613586	0.650702	0.614834	0.262332	0.874198	-0.432098	-0.401794	-1.02082	0.309206	-1.04795	-0.974205	-1.25516	-0.594555	-0.0792682	-0.0727357	-0.305799	0.177408	0.124646	0.145997	-0.159305	0.472074	0.330647	0.327208	-0.0418816	0.68001	0.347927	0.300034	-0.0528513	0.59066	-0.333265	-0.327439	-0.674282	0.159239	-0.0015726
1440	0.477458	0.464117	0.287648	0.65628	0.456826	0.452155	-0.00682623	0.846952	0.50143	0.492366	0.0317487	0.930911	-0.202916	-0.211954	-0.832855	0.594927	0.647354	0.60844	0.239861	0.873669	-0.403225	-0.391875	-1.04997	0.31103	-0.965042	-0.904505	-1.20844	-0.565513	-0.080012	-0.0743634	-0.310809	0.174519	0.12636	0.148501	-0.211119	0.475531	0.327818	0.325427	-0.0510905	0.690751	0.359686	0.314048	-0.021227	0.590489	-0.32949	-0.312199	-0.646997	0.178798	-0.0401551
1480	0.459263	0.444774	0.262762	0.638995	0.441578	0.437969	-0.0124677	0.814097	0.487525	0.484937	0.0760483	0.916236	-0.236174	-0.244891	-0.86302	0.561144	0.647233	0.60459	0.239096	0.87872	-0.374918	-0.381657	-1.04287	0.287845	-0.890082	-0.835008	-1.13848	-0.368813	-0.079073	-0.0752028	-0.312913	0.17043	0.132282	0.156015	-0.241173	0.506218	0.3252	0.322371	-0.0575946	0.70211	0.362872	0.322016	0.00490293	0.598933	-0.312684	-0.294976	-0.621973	0.178371	-0.0700622
1520	0.440273	0.426957	0.231998	0.629064	0.420994	0.417383	-0.0320148	0.768526	0.486602	0.485153	0.100274	0.907367	-0.271677	-0.282267	-0.897035	0.526364	0.652004	0.605142	0.231854	0.896519	-0.349158	-0.368379	-0.969146	0.232501	-0.825535	-0.772885	-1.10756	-0.176232	-0.0759163	-0.0741748	-0.317585	0.159582	0.142256	0.167	-0.262969	0.522492	0.323928	0.316213	-0.0616052	0.710251	0.35655	0.321554	0.0280808	0.602518	-0.29652	-0.279282	-0.596714	0.167797	-0.0889736
1560	0.42179	0.411695	0.205397	0.627092	0.394142	0.391444	-0.0378783	0.723449	0.497555	0.493873	0.129024	0.900026	-0.306919	-0.32001	-0.928268	0.485027	0.663333	0.610907	0.22628	0.919438	-0.328278	-0.350215	-0.843606	0.187542	-0.770077	-0.719676	-1.13237	0.00862558	-0.0700069	-0.070003	-0.31328	0.155536	0.156125	0.179886	-0.291033	0.556545	0.318669	0.305886	-0.0718685	0.716474	0.339783	0.310758	0.0210624	0.598786	-0.286726	-0.267556	-0.587024	0.17078	-0.0945687
1600	0.406509	0.399647	0.183664	0.624456	0.361091	0.361659	-0.0589757	0.68368	0.515992	0.511717	0.166259	0.89543	-0.339391	-0.353319	-0.941203	0.460346	0.682883	0.621882	0.209773	0.951986	-0.314611	-0.328301	-0.718725	0.150232	-0.722386	-0.675683	-1.27457	0.153433	-0.0608098	-0.0623676	-0.303984	0.154085	0.171648	0.19299	-0.30731	0.580952	0.299837	0.290559	-0.0818546	0.718747	0.311634	0.288383	0.0123486	0.581275	-0.283455	-0.261769	-0.584311	0.14421	-0.084764
1640	0.395123	0.391425	0.167459	0.628002	0.328848	0.329703	-0.0675979	0.637957	0.538931	0.538548	0.209092	0.891565	-0.366551	-0.377832	-0.947796	0.4369	0.704271	0.63645	0.17383	0.992839	-0.310493	-0.308203	-0.626799	0.137498	-0.681141	-0.644318	-1.41676	0.245932	-0.0477901	-0.0514142	-0.29491	0.171076	0.185649	0.204782	-0.294693	0.603048	0.269679	0.269179	-0.107962	0.707012	0.271788	0.254408	-0.0270332	0.550758	-0.286862	-0.262961	-0.582909	0.120128	-0.0620546
1680	0.387487	0.38737	0.159355	0.631677	0.299104	0.298102	-0.0886406	0.603505	0.563389	0.568494	0.246279	0.892368	-0.385659	-0.390353	-0.955508	0.407054	0.71275	0.649283	0.14281	1.02645	-0.318256	-0.296559	-0.628482	0.149002	-0.64577	-0.630603	-1.55896	0.293143	-0.0306889	-0.0389197	-0.288271	0.19284	0.196943	0.213804	-0.279895	0.619927	0.230672	0.241004	-0.141861	0.695188	0.22976	0.213789	-0.0839441	0.520364	-0.2971	-0.271673	-0.610451	0.0955404	-0.0296022
1720	0.383459	0.387325	0.156312	0.642741	0.272056	0.268097	-0.109888	0.580634	0.586384	0.593505	0.274872	0.899282	-0.395881	-0.391025	-0.950446	0.422759	0.708636	0.652861	0.108569	1.05705	-0.340232	-0.295625	-0.684961	0.203492	-0.640343	-0.636024	-1.69462	0.306746	-0.0160441	-0.02697	-0.283957	0.200789	0.204344	0.219087	-0.259761	0.629407	0.185293	0.207099	-0.182623	0.677458	0.189633	0.171592	-0.142772	0.493691	-0.314325	-0.2869	-0.627311	0.0572553	0.0102061
1760	0.382892	0.390838	0.16009	0.647952	0.247897	0.24012	-0.126143	0.551696	0.604934	0.611223	0.283857	0.91637	-0.396925	-0.381685	-0.928122	0.410896	0.69267	0.642845	0.0445791	1.07045	-0.361848	-0.30142	-0.726837	0.27675	-0.668408	-0.655274	-1.69585	0.287588	-0.00713008	-0.0173578	-0.279683	0.212095	0.20667	0.219767	-0.236427	0.631247	0.136017	0.170374	-0.218061	0.657822	0.152149	0.131441	-0.198542	0.465675	-0.33779	-0.307342	-0.63259	0.0415891	0.0549832
1800	0.385643	0.397039	0.17405	0.646324	0.226826	0.214718	-0.13841	0.531389	0.616017	0.620144	0.29021	0.919053	-0.388494	-0.363996	-0.906374	0.41732	0.66559	0.618143	-0.0125228	1.06951	-0.370163	-0.30724	-0.762483	0.359943	-0.718299	-0.679069	-1.69851	0.260412	-0.00436863	-0.0125637	-0.282557	0.223937	0.202735	0.215225	-0.216668	0.622505	0.0853206	0.133798	-0.259935	0.649426	0.11805	0.0954895	-0.258397	0.443529	-0.363177	-0.332102	-0.657295	0.0272515	0.102342
1840	0.391362	0.404798	0.191803	0.640729	0.209036	0.192908	-0.14594	0.527889	0.61614	0.618714	0.281161	0.920527	-0.370297	-0.339319	-0.885609	0.436782	0.628138	0.579637	-0.0722053	1.05359	-0.368421	-0.307669	-0.77321	0.461026	-0.778349	-0.694716	-1.68423	0.320632	-0.00818146	-0.0133974	-0.287348	0.229923	0.191356	0.205407	-0.196983	0.601327	0.039312	0.100446	-0.299538	0.64772	0.0880754	0.0650486	-0.300407	0.429507	-0.389298	-0.360332	-0.688194	-0.000700972	0.149895
1880	0.397457	0.41308	0.202108	0.6458	0.195282	0.176112	-0.146726	0.513006	0.605379	0.605957	0.26666	0.919933	-0.342037	-0.309632	-0.857422	0.457612	0.581052	0.530723	-0.151777	1.02472	-0.359867	-0.301396	-0.787388	0.540763	-0.836889	-0.688799	-1.50529	0.772458	-0.0189903	-0.0204679	-0.292215	0.220767	0.174957	0.191175	-0.193399	0.593924	0.0112446	0.0735478	-0.338262	0.647442	0.0629673	0.040641	-0.338069	0.406826	-0.415449	-0.391019	-0.712561	-0.0120719	0.195255
1920	0.403541	0.420925	0.219097	0.655848	0.187535	0.165772	-0.156798	0.511935	0.585048	0.58198	0.236308	0.910306	-0.303778	-0.280333	-0.812009	0.476306	0.526839	0.477244	-0.252545	0.982841	-0.347745	-0.291657	-0.798664	0.520506	-0.882253	-0.658173	-1.38538	1.30463	-0.0372169	-0.0353038	-0.307231	0.202856	0.160814	0.176552	-0.18482	0.564532	0.00211559	0.0576191	-0.368485	0.656688	0.0434667	0.0229964	-0.373023	0.404202	-0.440927	-0.421879	-0.761142	-0.0319026	0.234927
1960	0.410069	0.427727	0.234754	0.657507	0.185222	0.161981	-0.164786	0.506864	0.556464	0.549266	0.193819	0.895391	-0.268519	-0.257127	-0.774429	0.468298	0.472971	0.423844	-0.341756	0.92474	-0.335298	-0.281996	-0.827165	0.589918	-0.902034	-0.609628	-1.34511	1.79583	-0.0631945	-0.058379	-0.337048	0.181994	0.148268	0.163362	-0.190987	0.537267	0.0119465	0.0587872	-0.364568	0.670769	0.0298466	0.0123414	-0.39998	0.395168	-0.465029	-0.45025	-0.799889	-0.0540886	0.263201
2000	0.417498	0.43396	0.244582	0.662969	0.187512	0.163527	-0.174484	0.515212	0.520944	0.510658	0.141533	0.861486	-0.24279	-0.241946	-0.745964	0.459642	0.422345	0.373108	-0.388393	0.86703	-0.325771	-0.27273	-0.827898	0.614329	-0.8905	-0.55277	-1.28873	1.72698	-0.0946456	-0.0884746	-0.376736	0.154179	0.136321	0.151792	-0.198157	0.511217	0.040759	0.0781837	-0.350612	0.683624	0.0212933	0.00754904	-0.406319	0.388437	-0.48705	-0.473872	-0.828979	-0.0728248	0.279945
2040	0.426284	0.440516	0.254139	0.659754	0.193577	0.169388	-0.175104	0.521737	0.479803	0.4688	0.080329	0.828843	-0.22643	-0.235962	-0.740909	0.453114	0.377412	0.327	-0.429494	0.805127	-0.317271	-0.263747	-0.820721	0.61104	-0.8492	-0.493579	-1.2117	1.39239	-0.128583	-0.12297	-0.406376	0.111895	0.123977	0.140383	-0.194117	0.485717	0.0885746	0.115547	-0.307108	0.694504	0.0169714	0.00761035	-0.412594	0.382767	-0.502284	-0.490319	-0.835693	-0.109013	0.285585
2080	0.436883	0.448291	0.262211	0.661776	0.202587	0.17887	-0.17916	0.537679	0.434485	0.426793	0.0176376	0.806498	-0.219275	-0.239539	-0.756089	0.448957	0.340618	0.288023	-0.444254	0.736863	-0.301564	-0.253585	-0.808479	0.615884	-0.779792	-0.436923	-1.10801	0.899377	-0.162545	-0.159442	-0.442732	0.0769164	0.110239	0.126746	-0.19729	0.459548	0.155415	0.170114	-0.253076	0.725385	0.0160458	0.0113233	-0.397216	0.385931	-0.504635	-0.49714	-0.831497	-0.124553	0.280551
2120	0.449337	0.457593	0.267348	0.66515	0.213713	0.191906	-0.178156	0.567463	0.387873	0.387361	-0.0506284	0.793423	-0.221161	-0.250828	-0.784174	0.442258	0.314412	0.259523	-0.429953	0.673013	-0.280632	-0.239761	-0.795075	0.596978	-0.683935	-0.37588	-0.980219	0.540096	-0.194071	-0.195377	-0.475172	0.0459411	0.0941102	0.109002	-0.205292	0.43717	0.238773	0.240142	-0.179779	0.75533	0.0176814	0.017531	-0.381296	0.386913	-0.494981	-0.492564	-0.819193	-0.124615	0.26527
2160	0.460266	0.467599	0.272401	0.670137	0.228695	0.209953	-0.166155	0.590101	0.341776	0.35027	-0.0976957	0.777963	-0.231927	-0.261482	-0.808075	0.471244	0.301243	0.245903	-0.373974	0.619211	-0.256816	-0.22154	-0.767141	0.582537	-0.563285	-0.304276	-0.861976	0.45827	-0.2207	-0.225591	-0.506477	0.0206511	0.074038	0.0843377	-0.2192	0.412984	0.321423	0.319974	-0.0962454	0.80693	0.0210434	0.0243185	-0.36982	0.391258	-0.474288	-0.476838	-0.809209	-0.0988549	0.240171
2200	0.468922	0.476202	0.27728	0.67871	0.25213	0.235185	-0.144098	0.620589	0.297543	0.312673	-0.154085	0.76576	-0.251201	-0.261523	-0.839592	0.505356	0.302694	0.249225	-0.296532	0.579801	-0.232458	-0.201796	-0.767241	0.647022	-0.423162	-0.21947	-0.717797	0.377011	-0.239972	-0.245146	-0.523934	-0.00156173	0.04743	0.0529433	-0.243146	0.384932	0.397686	0.395008	-0.0189802	0.870131	0.0252967	0.0292838	-0.36576	0.388339	-0.443521	-0.453114	-0.786706	-0.0884482	0.205682
2240	0.475425	0.482637	0.279905	0.686887	0.282711	0.267828	-0.113811	0.658103	0.256524	0.275353	-0.211163	0.760528	-0.263189	-0.249886	-0.858484	0.563874	0.314256	0.267803	-0.20924	0.547987	-0.209901	-0.184123	-0.775884	0.73076	-0.293773	-0.136386	-0.555776	0.511848	-0.249485	-0.25332	-0.522413	-0.00795001	0.0153901	0.0172028	-0.273004	0.360931	0.464621	0.458258	0.0328357	0.904765	0.0285659	0.0309203	-0.363256	0.38898	-0.403645	-0.423158	-0.778663	-0.0651475	0.169616
2280	0.479896	0.487081	0.265452	0.693665	0.318903	0.306958	-0.0776904	0.707189	0.220069	0.24046	-0.273597	0.759176	-0.259662	-0.227557	-0.85753	0.648274	0.332948	0.298254	-0.125019	0.537402	-0.191487	-0.171793	-0.765561	0.738411	-0.187205	-0.0741316	-0.404097	0.667576	-0.249188	-0.250683	-0.523564	0.00308711	-0.0205617	-0.0207079	-0.302262	0.331753	0.519282	0.506597	0.0781876	0.952413	0.0268088	0.0278449	-0.361046	0.382508	-0.355849	-0.388059	-0.758072	-0.0122606	0.142748
2320	0.482453	0.490013	0.263867	0.696014	0.35917	0.350607	-0.0349635	0.758332	0.189525	0.210601	-0.329828	0.769288	-0.242821	-0.19616	-0.858426	0.701464	0.356458	0.335558	-0.0159453	0.541777	-0.17824	-0.166656	-0.782861	0.666822	-0.110478	-0.0468565	-0.298403	0.639749	-0.241287	-0.238506	-0.493792	0.0154293	-0.0589051	-0.0589301	-0.348714	0.313966	0.558727	0.538104	0.101669	0.986853	0.02038	0.0191901	-0.355086	0.373782	-0.309909	-0.349037	-0.73037	0.0338486	0.124314
2360	0.483216	0.491502	0.256934	0.702138	0.401979	0.395418	0.0187857	0.799584	0.167869	0.188965	-0.392113	0.782643	-0.214872	-0.157795	-0.84824	0.772881	0.38247	0.373983	0.0455003	0.556427	-0.165361	-0.166014	-0.790695	0.612331	-0.070615	-0.06063	-0.280952	0.332272	-0.227947	-0.218323	-0.468353	0.0270258	-0.0981201	-0.096078	-0.418663	0.310615	0.580013	0.551517	0.0985773	0.990888	0.010046	0.00480262	-0.363675	0.358341	-0.270796	-0.307051	-0.729963	0.105039	0.113439
2400	0.482026	0.49095	0.252979	0.696912	0.445793	0.437077	0.0723249	0.840691	0.164076	0.179618	-0.426975	0.809568	-0.178019	-0.116208	-0.816882	0.821424	0.408672	0.406871	0.0882905	0.580012	-0.152178	-0.165405	-0.777096	0.552179	-0.0746361	-0.105981	-0.369858	0.13676	-0.211331	-0.194308	-0.445108	0.0488042	-0.136686	-0.12895	-0.487243	0.322423	0.580912	0.547711	0.0744488	0.998638	-0.00342662	-0.0138835	-0.380277	0.337619	-0.238724	-0.265376	-0.707443	0.162633	0.109244
2440	0.477304	0.487364	0.253709	0.69635	0.483637	0.469727	0.123431	0.872037	0.175689	0.185688	-0.461718	0.845577	-0.134465	-0.0769644	-0.793676	0.840207	0.432748	0.43026	0.105003	0.60474	-0.138745	-0.158793	-0.771624	0.465998	-0.129295	-0.166653	-0.520034	0.137953	-0.193606	-0.173043	-0.41818	0.0628422	-0.1721	-0.15453	-0.548287	0.333998	0.570817	0.533749	0.0444506	0.993978	-0.0192712	-0.0335174	-0.394824	0.313845	-0.213909	-0.229661	-0.656476	0.205326	0.110854
2480	0.469225	0.480665	0.253431	0.686274	0.508595	0.491883	0.166426	0.899341	0.198391	0.203751	-0.458773	0.887619	-0.0864589	-0.043245	-0.739389	0.881022	0.452312	0.444501	0.116103	0.61936	-0.125117	-0.144002	-0.744833	0.378659	-0.197616	-0.223088	-0.802423	0.161274	-0.176935	-0.156509	-0.396647	0.0825152	-0.192556	-0.170045	-0.59281	0.345867	0.554914	0.514319	-0.00598537	0.984747	-0.0367212	-0.052561	-0.413591	0.281366	-0.196566	-0.201779	-0.625124	0.218376	0.117391
2520	0.458322	0.471194	0.252326	0.676653	0.521553	0.503774	0.193233	0.918096	0.227861	0.229377	-0.426314	0.913624	-0.0484341	-0.0179991	-0.694867	0.902197	0.465226	0.450738	0.0826046	0.627674	-0.111347	-0.123196	-0.733273	0.459714	-0.247468	-0.266568	-1.12907	0.206434	-0.163486	-0.146328	-0.382741	0.0921766	-0.195947	-0.173009	-0.635886	0.356754	0.535046	0.492013	-0.0438405	0.96723	-0.0550127	-0.070085	-0.426729	0.257413	-0.18691	-0.182077	-0.593684	0.206712	0.127809
2560	0.445126	0.459468	0.248232	0.664804	0.523427	0.50609	0.182491	0.89913	0.259782	0.257991	-0.381842	0.937507	-0.0299245	-0.00567654	-0.647366	0.898328	0.472212	0.450298	0.0366521	0.645085	-0.0974882	-0.0979201	-0.756275	0.524488	-0.275606	-0.295063	-1.38317	0.250172	-0.154626	-0.142842	-0.368263	0.0968804	-0.183479	-0.161968	-0.647699	0.369481	0.513056	0.469111	-0.0725638	0.935316	-0.0736786	-0.0863431	-0.438314	0.240519	-0.184748	-0.170542	-0.55317	0.183867	0.134505
2600	0.430168	0.44606	0.240592	0.654344	0.515129	0.499554	0.176595	0.87089	0.289833	0.285895	-0.341804	0.944324	-0.0298876	-0.0107713	-0.616871	0.848121	0.474511	0.444907	0.00204702	0.67537	-0.0838938	-0.0677505	-0.748616	0.614551	-0.278782	-0.308131	-1.52303	0.28746	-0.14975	-0.145523	-0.377152	0.113439	-0.156357	-0.136497	-0.643719	0.389768	0.490786	0.447896	-0.0815406	0.892901	-0.0928142	-0.101925	-0.445499	0.226928	-0.186724	-0.166728	-0.533881	0.181442	0.133398
2640	0.41398	0.431238	0.228087	0.642855	0.497574	0.485729	0.163554	0.826067	0.315359	0.311239	-0.292212	0.935269	-0.0472809	-0.0346482	-0.602815	0.804625	0.473365	0.437165	-0.0385202	0.706296	-0.0743357	-0.0345621	-0.731882	0.689191	-0.253748	-0.304091	-1.54224	0.306895	-0.147975	-0.152636	-0.390054	0.117462	-0.115788	-0.0983709	-0.627576	0.409455	0.470081	0.429581	-0.0886828	0.855093	-0.112577	-0.117748	-0.468017	0.229278	-0.190123	-0.168638	-0.502896	0.174667	0.123992
2680	0.396983	0.414373	0.207054	0.629605	0.471757	0.468551	0.13998	0.780031	0.33864	0.334784	-0.249778	0.928005	-0.0810618	-0.073531	-0.61643	0.747383	0.470016	0.429982	-0.0753074	0.731468	-0.0696711	-0.00562866	-0.716011	0.772154	-0.197258	-0.279225	-1.48608	0.330952	-0.14842	-0.160513	-0.406495	0.118484	-0.0629762	-0.0500473	-0.58899	0.439592	0.45271	0.411513	-0.105896	0.825003	-0.133123	-0.135367	-0.483929	0.226859	-0.19258	-0.171229	-0.488387	0.199303	0.105788
2720	0.379424	0.395824	0.187312	0.616538	0.447308	0.450977	0.121676	0.734302	0.357956	0.355313	-0.210256	0.907708	-0.130188	-0.12228	-0.646868	0.674261	0.465705	0.42497	-0.109817	0.753258	-0.0695586	0.00825607	-0.699959	0.865757	-0.120333	-0.233357	-1.44074	0.360214	-0.150204	-0.167672	-0.422707	0.114876	0.000800107	0.00629135	-0.535919	0.477839	0.434566	0.391477	-0.101415	0.775577	-0.154611	-0.154732	-0.509688	0.225914	-0.191729	-0.170942	-0.483443	0.214738	0.0782907
2760	0.362395	0.376947	0.165265	0.600596	0.429368	0.434476	0.105231	0.701809	0.371175	0.370199	-0.169945	0.89499	-0.193617	-0.175811	-0.69058	0.590273	0.461773	0.423744	-0.140164	0.767759	-0.0736568	-0.000786938	-0.677936	0.883265	-0.0601704	-0.172774	-1.26279	0.381606	-0.152444	-0.172815	-0.431294	0.115106	0.070496	0.0687453	-0.467712	0.563033	0.412378	0.369169	-0.109725	0.745086	-0.177197	-0.175288	-0.543654	0.228293	-0.185205	-0.165632	-0.491965	0.240598	0.0410014
2800	0.347088	0.359626	0.128187	0.59006	0.41648	0.419687	0.0927278	0.675844	0.376163	0.376553	-0.138816	0.870816	-0.253455	-0.227612	-0.72433	0.524082	0.46254	0.427392	-0.137202	0.777599	-0.0816242	-0.0345775	-0.68715	0.90281	-0.0190213	-0.111826	-1.13408	0.364535	-0.154137	-0.174673	-0.430147	0.109728	0.142283	0.135914	-0.390144	0.608077	0.386132	0.34463	-0.113919	0.711102	-0.201038	-0.19619	-0.564849	0.225849	-0.170643	-0.153894	-0.49369	0.265757	-0.00657673
2840	0.334697	0.345339	0.0935777	0.583408	0.407186	0.406984	0.083716	0.657116	0.370788	0.371941	-0.124291	0.844084	-0.293327	-0.269723	-0.770746	0.467543	0.468809	0.436509	-0.113847	0.785561	-0.0931194	-0.0738714	-0.763674	0.806916	0.0030023	-0.068822	-1.01269	0.317324	-0.153103	-0.17243	-0.419043	0.0996959	0.214345	0.206716	-0.315952	0.671328	0.355815	0.317497	-0.141409	0.686527	-0.225495	-0.216867	-0.602079	0.21901	-0.149415	-0.135242	-0.498592	0.305935	-0.0633313
2880	0.326413	0.335344	0.0611299	0.585373	0.40003	0.396209	0.0518326	0.655885	0.352918	0.356641	-0.100897	0.814331	-0.314466	-0.295554	-0.800854	0.403994	0.479231	0.450868	-0.0439674	0.792695	-0.107859	-0.113842	-0.914463	0.76447	0.00578897	-0.0506827	-0.952029	0.287011	-0.149926	-0.165481	-0.400387	0.0895255	0.284869	0.278766	-0.237273	0.721096	0.321415	0.287589	-0.180511	0.655912	-0.249063	-0.236995	-0.630913	0.224053	-0.129278	-0.111588	-0.486359	0.326852	-0.118193
2920	0.323428	0.329248	0.0345818	0.60027	0.393554	0.386214	0.0282534	0.654198	0.328479	0.338956	-0.0797926	0.777615	-0.318106	-0.303014	-0.810805	0.376053	0.49246	0.468458	-0.00955927	0.793477	-0.130642	-0.152657	-1.01924	0.679818	-0.0107729	-0.0549354	-0.891659	0.271159	-0.146059	-0.156203	-0.391463	0.0840761	0.352039	0.34806	-0.167809	0.762265	0.282917	0.254248	-0.232149	0.639279	-0.270793	-0.256215	-0.654891	0.218915	-0.11209	-0.0914759	-0.479249	0.340862	-0.16802
2960	0.324992	0.325782	0.0219203	0.617851	0.386335	0.376502	-0.00931172	0.660475	0.311838	0.324953	-0.0707151	0.74638	-0.305481	-0.29329	-0.804056	0.385187	0.507148	0.485895	0.0532723	0.793018	-0.162137	-0.191121	-1.09525	0.63259	-0.0453558	-0.0734082	-0.814854	0.26423	-0.14296	-0.14668	-0.38343	0.0887101	0.414042	0.410135	-0.0958472	0.831626	0.240308	0.218999	-0.298113	0.621583	-0.289734	-0.274286	-0.685811	0.215178	-0.099468	-0.0790733	-0.479298	0.316292	-0.211665
3000	0.324394	0.3236	0.00841166	0.623641	0.377943	0.367033	-0.0365859	0.666149	0.302324	0.315836	-0.057084	0.716213	-0.277824	-0.267716	-0.787815	0.410973	0.521946	0.500279	0.11951	0.782251	-0.19872	-0.231636	-1.16432	0.544274	-0.0796707	-0.0972759	-0.768067	0.261295	-0.142084	-0.14082	-0.377618	0.0924471	0.469062	0.460409	-0.0355058	0.864538	0.197493	0.18469	-0.345674	0.605004	-0.304937	-0.290385	-0.704397	0.209461	-0.0930315	-0.0749347	-0.473914	0.305445	-0.247975
3040	0.321194	0.320791	-9.22023e-05	0.632507	0.368442	0.357875	-0.0667861	0.669869	0.298846	0.312594	-0.0507672	0.697146	-0.236369	-0.227317	-0.764914	0.483504	0.535503	0.509329	0.176356	0.76936	-0.236768	-0.275261	-1.21628	0.444954	-0.104511	-0.119167	-0.753076	0.24927	-0.144887	-0.14168	-0.380497	0.0898558	0.511155	0.495784	-0.00171521	0.889423	0.161822	0.154701	-0.393987	0.573199	-0.315453	-0.302989	-0.710229	0.197068	-0.094399	-0.0786504	-0.450232	0.295762	-0.275802
3080	0.315676	0.316792	-0.00909774	0.630285	0.357763	0.349134	-0.088391	0.668221	0.300309	0.315194	-0.0410432	0.70583	-0.185992	-0.174305	-0.732039	0.552567	0.541008	0.510808	0.215452	0.752388	-0.272657	-0.316605	-1.26179	0.347287	-0.115233	-0.134546	-0.772639	0.255342	-0.152739	-0.149612	-0.397079	0.0857452	0.535221	0.514093	0.0126645	0.893825	0.137295	0.133483	-0.40574	0.555506	-0.320333	-0.310769	-0.724281	0.192526	-0.105145	-0.0893675	-0.440849	0.2683	-0.293996
3120	0.308124	0.311455	-0.0213302	0.629489	0.345841	0.34065	-0.0913336	0.662893	0.305623	0.322632	-0.0332004	0.733514	-0.133674	-0.114327	-0.673736	0.644094	0.533858	0.503475	0.249786	0.730369	-0.302764	-0.351543	-1.25039	0.249015	-0.107192	-0.137015	-0.746379	0.267686	-0.164866	-0.1641	-0.421537	0.0908747	0.542056	0.515509	0.00554464	0.873823	0.127903	0.124584	-0.417789	0.547179	-0.319183	-0.313114	-0.705308	0.158394	-0.12049	-0.105978	-0.431296	0.229608	-0.301405
3160	0.298823	0.30477	-0.0336354	0.620972	0.332607	0.33064	-0.0852686	0.650969	0.313693	0.332093	-0.0273616	0.760514	-0.0824433	-0.060645	-0.644723	0.729587	0.515008	0.48653	0.252913	0.704609	-0.323463	-0.374331	-1.31477	0.165334	-0.0757436	-0.1204	-0.6602	0.277802	-0.179138	-0.181755	-0.44535	0.0757597	0.532469	0.501771	0.00281723	0.840939	0.137635	0.131601	-0.381999	0.53816	-0.313766	-0.310463	-0.679143	0.144475	-0.135325	-0.124246	-0.429901	0.176644	-0.295518
3200	0.288056	0.297134	-0.0390859	0.608799	0.317996	0.317528	-0.0620551	0.639386	0.323658	0.34164	-0.0295667	0.779857	-0.035317	-0.0178851	-0.61321	0.791226	0.485412	0.459212	0.240347	0.669897	-0.333405	-0.38418	-1.36393	0.0873203	-0.0162447	-0.0829354	-0.558936	0.312701	-0.193567	-0.199306	-0.477954	0.0674235	0.507268	0.475318	-0.0129117	0.808407	0.170481	0.154905	-0.352777	0.551718	-0.304617	-0.303439	-0.655274	0.143864	-0.148177	-0.140751	-0.427838	0.14085	-0.273881
3240	0.276577	0.289051	-0.0408604	0.599239	0.301608	0.300653	-0.057298	0.613215	0.334853	0.350797	-0.0384169	0.790887	0.00468968	0.0131242	-0.596645	0.840991	0.446025	0.421884	0.198588	0.629637	-0.335279	-0.384399	-1.41077	0.0290693	0.0615758	-0.0266614	-0.451374	0.34547	-0.206165	-0.213547	-0.496534	0.0619737	0.46726	0.44004	-0.0404986	0.772368	0.230429	0.192382	-0.325016	0.58172	-0.292085	-0.292654	-0.627049	0.151393	-0.157576	-0.153634	-0.438043	0.128537	-0.238947
3280	0.266243	0.280941	-0.0544019	0.591638	0.280932	0.279809	-0.0656193	0.5885	0.346442	0.359208	-0.0377357	0.80845	0.0345613	0.0313232	-0.598577	0.868213	0.3978	0.375681	0.133745	0.5833	-0.330219	-0.379435	-1.44515	0.00773172	0.140084	0.0418864	-0.371057	0.408857	-0.214943	-0.221907	-0.505341	0.0587307	0.413253	0.398963	-0.0793569	0.723228	0.308408	0.240641	-0.291853	0.633288	-0.276522	-0.278773	-0.61263	0.167538	-0.162048	-0.160733	-0.449142	0.118956	-0.193344
3320	0.257758	0.27308	-0.0636445	0.589498	0.255938	0.255015	-0.0743123	0.550848	0.357588	0.366448	-0.0376857	0.81651	0.0512822	0.0369881	-0.632917	0.894412	0.341693	0.322344	0.0619452	0.532816	-0.31933	-0.37255	-1.46094	-0.0113303	0.213271	0.114103	-0.290741	0.476405	-0.217913	-0.223862	-0.507747	0.0558279	0.355401	0.355159	-0.132005	0.686708	0.375363	0.296676	-0.230854	0.69604	-0.25828	-0.262406	-0.600233	0.182667	-0.160123	-0.159788	-0.450405	0.130789	-0.139698
3360	0.251737	0.26606	-0.0612354	0.58803	0.227217	0.226717	-0.0861466	0.524417	0.367457	0.372022	-0.0284043	0.809787	0.0570232	0.031681	-0.690069	0.893706	0.285779	0.26542	-0.0126556	0.488249	-0.303716	-0.363746	-1.46051	0.0888285	0.275134	0.182378	-0.210424	0.550367	-0.213365	-0.219472	-0.502049	0.0568196	0.315834	0.315528	-0.19702	0.669269	0.428789	0.356639	-0.199827	0.761282	-0.237709	-0.243909	-0.592234	0.188488	-0.150167	-0.149397	-0.44022	0.157692	-0.0806382
3400	0.248792	0.261302	-0.065584	0.589843	0.195357	0.196011	-0.115122	0.50216	0.375211	0.375805	-0.0192709	0.791925	0.0595435	0.0196062	-0.789565	0.866439	0.241912	0.211192	-0.101774	0.440854	-0.284482	-0.349649	-1.46021	0.153107	0.319668	0.239825	-0.132652	0.604951	-0.203845	-0.210054	-0.495019	0.0614388	0.293448	0.289003	-0.230372	0.668685	0.467354	0.409703	-0.174043	0.825264	-0.215223	-0.223684	-0.580103	0.21932	-0.130207	-0.128397	-0.426681	0.194412	-0.0187909
3440	0.249539	0.260067	-0.0773701	0.58818	0.16095	0.164083	-0.16411	0.503231	0.380042	0.377617	-0.00970111	0.787631	0.060222	0.00589103	-0.837312	0.818206	0.210443	0.166844	-0.191477	0.399218	-0.262734	-0.327777	-1.45998	0.226736	0.340869	0.282288	-0.101379	0.642625	-0.191009	-0.196736	-0.483477	0.0775761	0.286069	0.275975	-0.226647	0.68278	0.48973	0.445115	-0.15629	0.868551	-0.192372	-0.202419	-0.55951	0.245837	-0.101298	-0.0977226	-0.39287	0.229774	0.0432096
3480	0.25459	0.262627	-0.0822335	0.58156	0.124585	0.131987	-0.226129	0.492251	0.383174	0.378121	-0.00308707	0.779099	0.0603429	-0.00500205	-0.863967	0.782495	0.191573	0.136426	-0.277195	0.381539	-0.240449	-0.299653	-1.45996	0.306273	0.343035	0.310189	-0.0886443	0.681865	-0.175543	-0.179598	-0.466935	0.0918908	0.291525	0.275415	-0.216026	0.698394	0.494585	0.461584	-0.145774	0.891682	-0.170203	-0.181047	-0.532612	0.276666	-0.06505	-0.0593469	-0.350942	0.277893	0.100377
3520	0.263881	0.268709	-0.0810459	0.585858	0.0874846	0.100548	-0.280991	0.482098	0.384961	0.377788	0.0156581	0.772588	0.0611904	-0.00928765	-0.881097	0.756243	0.185505	0.120751	-0.332541	0.39313	-0.220621	-0.269283	-1.45505	0.399452	0.361801	0.328855	-0.0896759	0.713026	-0.158131	-0.159167	-0.457671	0.112995	0.307642	0.285456	-0.212268	0.718898	0.48059	0.459222	-0.133651	0.882948	-0.149378	-0.160543	-0.509469	0.295264	-0.0230704	-0.0157147	-0.309612	0.328477	0.151111
3560	0.275725	0.27773	-0.0732525	0.595182	0.0527431	0.0702129	-0.331208	0.474228	0.384429	0.376648	0.0174058	0.766777	0.0640486	-0.00620979	-0.860584	0.74712	0.192443	0.119377	-0.393071	0.41632	-0.202339	-0.240956	-1.46142	0.550068	0.39917	0.347377	-0.103547	0.754848	-0.139457	-0.13619	-0.441771	0.140003	0.332247	0.304033	-0.181035	0.739725	0.449234	0.438804	-0.12267	0.851253	-0.130564	-0.141675	-0.482177	0.297769	0.0230315	0.0306277	-0.256568	0.371026	0.197084
3600	0.289342	0.288786	-0.0669292	0.609334	0.0208992	0.0411624	-0.364676	0.450201	0.380603	0.373757	0.0112071	0.773644	0.0702017	0.00151281	-0.871743	0.764096	0.212589	0.131275	-0.406036	0.439889	-0.184408	-0.21658	-1.45957	0.61297	0.453285	0.371164	-0.121148	0.795668	-0.120206	-0.112735	-0.43179	0.179078	0.361412	0.327757	-0.160572	0.758782	0.413029	0.401895	-0.136841	0.811801	-0.114424	-0.124932	-0.458926	0.312683	0.071647	0.0776558	-0.207371	0.410532	0.23997
3640	0.304009	0.300947	-0.0583713	0.62172	-0.00781467	0.0130478	-0.392516	0.43198	0.372507	0.36737	-0.00686414	0.770322	0.0807503	0.00336632	-0.883213	0.772789	0.243317	0.154663	-0.411712	0.462506	-0.165631	-0.196513	-1.44498	0.607468	0.522286	0.400294	-0.156058	0.843229	-0.101439	-0.0930461	-0.424747	0.222481	0.384997	0.351707	-0.130209	0.759769	0.37586	0.354969	-0.152184	0.759967	-0.101622	-0.111075	-0.441531	0.312472	0.120801	0.123967	-0.165611	0.445	0.281441
3680	0.319004	0.313805	-0.0508246	0.626179	-0.0331659	-0.0141649	-0.414472	0.397237	0.359167	0.357991	-0.020172	0.758305	0.0969143	-0.00245659	-0.928963	0.773295	0.27566	0.185896	-0.383591	0.488665	-0.144813	-0.181078	-1.42461	0.617077	0.604316	0.43152	-0.198152	0.88866	-0.0876538	-0.0800475	-0.418925	0.23372	0.401578	0.371886	-0.0819736	0.740976	0.340316	0.311667	-0.175944	0.702438	-0.0928243	-0.100778	-0.429762	0.302543	0.168731	0.169392	-0.124182	0.479648	0.32317
3720	0.333605	0.327149	-0.0311136	0.635989	-0.054922	-0.0399039	-0.432385	0.344154	0.340186	0.34683	-0.026993	0.725642	0.12051	-0.00909653	-1.02813	0.76797	0.306425	0.220841	-0.367275	0.513457	-0.120758	-0.171281	-1.3921	0.594318	0.697132	0.461339	-0.269426	0.939055	-0.0784562	-0.0724073	-0.421868	0.237927	0.411006	0.384442	-0.0495302	0.696412	0.308984	0.277315	-0.167307	0.647326	-0.088513	-0.0944197	-0.421591	0.293295	0.215591	0.21401	-0.0846938	0.529361	0.36683
3760	0.347088	0.340773	-0.0108065	0.641414	-0.0728504	-0.0633582	-0.43665	0.2957	0.324449	0.33557	-0.0300606	0.695876	0.153369	-0.00865473	-1.0629	0.732862	0.332813	0.255327	-0.333959	0.526922	-0.0961301	-0.170195	-1.35776	0.571279	0.788914	0.488454	-0.341667	0.990468	-0.0718925	-0.0665363	-0.421689	0.254081	0.413132	0.387988	-0.0162378	0.64951	0.284453	0.252997	-0.173403	0.603141	-0.0881519	-0.0920423	-0.415889	0.278605	0.261624	0.257994	-0.0511889	0.559843	0.412951
3800	0.359336	0.354191	0.0163707	0.654519	-0.0872964	-0.0836746	-0.427005	0.254056	0.313415	0.326077	-0.0164885	0.669854	0.197318	0.0059768	-1.09102	0.704943	0.352024	0.284261	-0.308558	0.533877	-0.0980502	-0.180877	-1.30665	0.540269	0.869027	0.513902	-0.413303	1.04137	-0.0660099	-0.0603824	-0.394625	0.26867	0.407807	0.382199	0.0015782	0.593501	0.269311	0.238202	-0.159904	0.571743	-0.0908551	-0.0931809	-0.407333	0.257076	0.307077	0.301521	-0.0104277	0.594958	0.448227
3840	0.371076	0.366959	0.037852	0.660235	-0.0997161	-0.100004	-0.41749	0.215917	0.30464	0.319192	-0.00406206	0.654071	0.25419	0.0408215	-1.12978	0.697977	0.36126	0.302013	-0.285316	0.546442	-0.12424	-0.202401	-1.27669	0.448568	0.929732	0.53732	-0.437862	1.09114	-0.0588554	-0.0519687	-0.386075	0.282266	0.394883	0.369492	0.0132109	0.539149	0.265526	0.232012	-0.132559	0.545721	-0.0957363	-0.0974932	-0.404027	0.24705	0.352195	0.343926	0.0413302	0.615307	0.468785
3880	0.382174	0.378888	0.0599389	0.663265	-0.110538	-0.112543	-0.400345	0.176815	0.295683	0.313046	-0.00572898	0.644235	0.325812	0.0974567	-1.11995	0.704973	0.357719	0.306125	-0.244408	0.548088	-0.165169	-0.231814	-1.24875	0.388161	0.963292	0.55388	-0.428794	1.12591	-0.048476	-0.0400019	-0.387897	0.301784	0.37465	0.355285	0.0304688	0.529264	0.268422	0.232813	-0.103397	0.518185	-0.101909	-0.10352	-0.410888	0.24507	0.397223	0.382518	0.101841	0.639591	0.475129
3920	0.392477	0.39037	0.0797835	0.665605	-0.120137	-0.122581	-0.382827	0.149764	0.284101	0.302338	-0.0104529	0.617385	0.409153	0.170619	-1.08447	0.728084	0.34159	0.299135	-0.237652	0.549825	-0.211307	-0.264451	-1.23621	0.328565	0.961967	0.55583	-0.414251	1.13552	-0.0332909	-0.0253325	-0.384486	0.320765	0.352874	0.341204	0.0482692	0.540245	0.274446	0.238372	-0.0880669	0.496482	-0.108488	-0.108725	-0.410778	0.23839	0.435986	0.414108	0.150137	0.650148	0.467764
3960	0.401828	0.401445	0.0990018	0.668428	-0.128889	-0.130971	-0.364504	0.13293	0.267451	0.284701	-0.0139308	0.600357	0.49283	0.256518	-0.976955	0.80234	0.325125	0.284722	-0.270142	0.555082	-0.253122	-0.295153	-1.21763	0.291955	0.918021	0.534988	-0.522085	1.10923	-0.0161116	-0.00849679	-0.374152	0.336476	0.332631	0.328083	0.0767376	0.548899	0.28107	0.246574	-0.073066	0.480414	-0.114585	-0.110961	-0.40727	0.234894	0.463174	0.437875	0.186461	0.668232	0.447194
4000	0.410071	0.411781	0.113768	0.667106	-0.137169	-0.138135	-0.35393	0.114699	0.243607	0.259479	-0.0294918	0.572145	0.575569	0.35254	-0.849238	0.87209	0.309651	0.264715	-0.322719	0.553838	-0.281084	-0.318897	-1.20335	0.252583	0.842021	0.489455	-0.718721	1.04983	0.00215141	0.00995552	-0.351597	0.345077	0.315521	0.316392	0.0775387	0.553959	0.285765	0.254938	-0.0637756	0.47308	-0.118023	-0.108403	-0.400451	0.22548	0.480023	0.454159	0.196982	0.687774	0.413924
4040	0.417052	0.42072	0.13339	0.668342	-0.145353	-0.143988	-0.361982	0.115481	0.213374	0.226673	-0.0586527	0.554261	0.656604	0.455667	-0.727048	0.987464	0.294764	0.240389	-0.371235	0.5536	-0.286302	-0.332899	-1.18638	0.225604	0.760463	0.428209	-0.882415	0.970088	0.0216472	0.0301589	-0.319553	0.362609	0.303144	0.306788	0.0766146	0.568428	0.286006	0.260403	-0.0374691	0.456107	-0.113635	-0.100349	-0.401409	0.233808	0.487768	0.463909	0.182116	0.706169	0.368457
4080	0.422769	0.427615	0.141087	0.667458	-0.151651	-0.148134	-0.386183	0.124991	0.176979	0.186568	-0.106504	0.529996	0.735172	0.563359	-0.576663	1.11624	0.280059	0.212909	-0.446511	0.563948	-0.282249	-0.335829	-1.18145	0.200213	0.675858	0.367198	-0.925931	0.884019	0.0425245	0.0525314	-0.285836	0.370317	0.2971	0.300566	0.0663775	0.575711	0.279262	0.259804	-0.0176269	0.433923	-0.101946	-0.0873805	-0.401281	0.243479	0.487647	0.467906	0.168699	0.72677	0.313002
4120	0.427733	0.432273	0.157211	0.667428	-0.153626	-0.149324	-0.423807	0.15468	0.134247	0.140402	-0.164333	0.518091	0.810511	0.668374	-0.407073	1.23429	0.265132	0.183598	-0.517118	0.571768	-0.278429	-0.330944	-1.20673	0.203427	0.590419	0.325785	-0.75496	0.789042	0.0649324	0.0772036	-0.262584	0.384292	0.298989	0.299276	0.0434854	0.578374	0.263336	0.251036	0.0047576	0.406947	-0.0840631	-0.0708573	-0.390867	0.257758	0.480894	0.464561	0.158989	0.744703	0.255411
4160	0.432528	0.43596	0.157385	0.66712	-0.151796	-0.145688	-0.451333	0.18123	0.0850007	0.092455	-0.238912	0.516362	0.881856	0.758675	-0.265777	1.33179	0.24958	0.15494	-0.561742	0.580038	-0.275595	-0.321233	-1.23275	0.22132	0.506359	0.31193	-0.483321	0.694878	0.0890197	0.102918	-0.221424	0.404632	0.310269	0.302137	0.0159041	0.576042	0.245147	0.236812	0.0175787	0.378945	-0.0610941	-0.052017	-0.371635	0.276738	0.468217	0.450984	0.141747	0.74299	0.198894
4200	0.437732	0.439903	0.161099	0.679059	-0.146697	-0.137542	-0.474025	0.209411	0.0290635	0.0452487	-0.311442	0.494902	0.946668	0.827718	-0.154253	1.4043	0.233363	0.129936	-0.595894	0.573473	-0.274494	-0.308818	-1.2738	0.25635	0.425892	0.321176	-0.403149	0.60807	0.114633	0.128734	-0.178207	0.420838	0.323098	0.306571	-0.0301548	0.573768	0.228905	0.220847	0.0249411	0.362857	-0.0341456	-0.0304937	-0.357015	0.291058	0.443857	0.427909	0.0950048	0.735625	0.146095
4240	0.443928	0.445141	0.165174	0.681919	-0.138867	-0.125892	-0.483159	0.236447	-0.0337407	0.000613523	-0.3843	0.495722	0.9985	0.871333	-0.0888201	1.45392	0.218918	0.110459	-0.621618	0.567118	-0.275878	-0.298144	-1.30653	0.296972	0.351955	0.350124	-0.403149	0.53855	0.138566	0.153419	-0.146837	0.456065	0.331954	0.310237	-0.0809541	0.572163	0.215315	0.206023	0.0292093	0.358402	-0.0043248	-0.00527739	-0.343447	0.312924	0.408971	0.397927	0.0421091	0.724166	0.0996621
4280	0.451695	0.452286	0.16262	0.696703	-0.128839	-0.112024	-0.471143	0.268557	-0.0979651	-0.038733	-0.450821	0.505619	1.03558	0.88572	-0.0638123	1.47578	0.20536	0.0967402	-0.613874	0.561074	-0.280495	-0.292992	-1.35692	0.340718	0.289519	0.39356	-0.403163	0.752607	0.159547	0.175964	-0.124956	0.488952	0.336421	0.310896	-0.124505	0.574868	0.205086	0.194355	0.0101994	0.36026	0.0270951	0.0237878	-0.312843	0.337137	0.3675	0.364322	-0.0201245	0.709068	0.0622401
4320	0.461614	0.461214	0.174843	0.718843	-0.11715	-0.0974865	-0.458608	0.286719	-0.140201	-0.070265	-0.496179	0.514974	1.05648	0.870533	-0.0977263	1.47351	0.190943	0.086672	-0.584148	0.545134	-0.289096	-0.294362	-1.39402	0.38379	0.238078	0.445899	-0.403636	1.12129	0.177101	0.195264	-0.109003	0.517619	0.336085	0.305607	-0.174242	0.571851	0.198923	0.187416	-0.0118914	0.366096	0.0560084	0.0556628	-0.279794	0.364781	0.323383	0.330439	-0.0686654	0.68598	0.0364752
4360	0.472732	0.471199	0.182317	0.729059	-0.104383	-0.0835985	-0.425135	0.321743	-0.158132	-0.0898335	-0.518922	0.520942	1.0598	0.83469	-0.168768	1.45719	0.17392	0.0762502	-0.592987	0.52463	-0.29801	-0.301081	-1.40891	0.425576	0.196353	0.504828	-0.406826	1.52422	0.190754	0.209725	-0.103513	0.537049	0.330529	0.291693	-0.21141	0.55961	0.197533	0.184906	-0.0482146	0.368931	0.0804928	0.0873505	-0.250609	0.386435	0.28056	0.297136	-0.135046	0.659346	0.0250132
4400	0.483464	0.48138	0.187656	0.751486	-0.0917095	-0.0709776	-0.380865	0.344713	-0.152076	-0.0908471	-0.516163	0.536553	1.04411	0.793357	-0.257856	1.42419	0.152546	0.0610248	-0.5858	0.487619	-0.302828	-0.30935	-1.38831	0.437028	0.163062	0.562003	-0.402225	1.92337	0.200034	0.218159	-0.102454	0.55182	0.319339	0.270376	-0.269487	0.559402	0.201614	0.180636	-0.0869335	0.380269	0.099833	0.113039	-0.224135	0.405065	0.242971	0.262171	-0.183844	0.630141	0.0185038
4440	0.493716	0.491311	0.197358	0.767674	-0.0805035	-0.0600297	-0.364322	0.350187	-0.122353	-0.0716108	-0.467484	0.506849	1.00799	0.749947	-0.331578	1.37637	0.125076	0.039263	-0.581481	0.439987	-0.303815	-0.314315	-1.36115	0.435478	0.136924	0.600988	-0.405785	2.23984	0.204466	0.221285	-0.107684	0.562471	0.302099	0.244453	-0.336328	0.562726	0.207	0.170394	-0.151622	0.409829	0.113314	0.129884	-0.202091	0.425592	0.213476	0.22603	-0.229111	0.611764	0.00296825
4480	0.503397	0.500649	0.203342	0.785905	-0.0721386	-0.0514104	-0.370713	0.357094	-0.0692827	-0.0334085	-0.399348	0.527237	0.954429	0.704781	-0.351521	1.31414	0.0900096	0.0112618	-0.594005	0.382592	-0.301236	-0.312599	-1.39181	0.433879	0.116557	0.603663	-0.484331	2.42084	0.20423	0.221202	-0.1097	0.564236	0.276762	0.217145	-0.368617	0.564006	0.209248	0.154215	-0.234449	0.460389	0.120221	0.137289	-0.194931	0.430246	0.189821	0.191016	-0.268577	0.58764	-0.0190708
4520	0.512415	0.509174	0.204465	0.800106	-0.0679884	-0.0461884	-0.373298	0.359762	0.00681607	0.0213163	-0.306278	0.520031	0.898444	0.65782	-0.390333	1.24003	0.0513849	-0.0217862	-0.600133	0.310653	-0.29536	-0.303971	-1.41015	0.426599	0.0956031	0.557459	-0.744791	2.3186	0.205059	0.21987	-0.110909	0.56433	0.243986	0.191445	-0.406991	0.56736	0.207506	0.133296	-0.31849	0.511591	0.119839	0.137026	-0.186127	0.440682	0.171009	0.159564	-0.284879	0.557758	-0.0449845
4560	0.520677	0.516532	0.209541	0.803226	-0.0694264	-0.0456378	-0.394061	0.364922	0.0953284	0.0897347	-0.225346	0.522511	0.839992	0.608215	-0.411517	1.15206	0.0109279	-0.0579221	-0.601496	0.234255	-0.286453	-0.290896	-1.39294	0.402434	0.0722538	0.471782	-0.980006	2.12366	0.20773	0.218707	-0.10479	0.564613	0.208379	0.170144	-0.432123	0.576551	0.200921	0.109839	-0.390927	0.560751	0.111452	0.131236	-0.187984	0.454567	0.156344	0.133825	-0.300619	0.532175	-0.0721444
4600	0.528092	0.522507	0.214504	0.80691	-0.0777823	-0.0511439	-0.436057	0.368637	0.171091	0.166042	-0.152897	0.529498	0.777437	0.554936	-0.417525	1.05525	-0.0317243	-0.0949369	-0.589823	0.148206	-0.274784	-0.275995	-1.3226	0.367295	0.0484353	0.367738	-1.13598	1.76744	0.211413	0.218652	-0.0845322	0.552705	0.174557	0.154908	-0.441562	0.600706	0.188642	0.0860003	-0.482204	0.602829	0.0982602	0.122285	-0.188313	0.444919	0.145131	0.114452	-0.302344	0.504902	-0.0979217
4640	0.533617	0.526581	0.21217	0.815968	-0.0925695	-0.0637817	-0.46539	0.375121	0.233265	0.234351	-0.0994653	0.555744	0.709147	0.498728	-0.40451	0.955211	-0.0769346	-0.130899	-0.599999	0.0837808	-0.256111	-0.258314	-1.22039	0.332942	0.0260734	0.26499	-1.32154	1.37151	0.215274	0.218642	-0.0771892	0.54585	0.147139	0.145682	-0.433311	0.629395	0.169815	0.0654474	-0.53566	0.612134	0.085096	0.11252	-0.196243	0.441646	0.136674	0.100215	-0.296333	0.494378	-0.119688
4680	0.536772	0.528696	0.208414	0.816346	-0.111666	-0.0819286	-0.506736	0.370555	0.282162	0.28535	-0.0642777	0.59717	0.633488	0.439617	-0.408144	0.852173	-0.125066	-0.164194	-0.607464	0.0744563	-0.221101	-0.234009	-1.06251	0.2919	0.00709391	0.173585	-1.25262	0.999298	0.218481	0.217692	-0.077023	0.533356	0.13074	0.141474	-0.428166	0.665521	0.143589	0.0493629	-0.566608	0.602894	0.0721737	0.10218	-0.200207	0.42756	0.130276	0.0915571	-0.276121	0.48119	-0.134604
4720	0.538084	0.529615	0.204552	0.82814	-0.133025	-0.1038	-0.574058	0.363207	0.318096	0.319107	-0.0539976	0.656691	0.548827	0.37751	-0.418039	0.747604	-0.176481	-0.194065	-0.633413	0.12429	-0.172273	-0.198428	-0.902047	0.242892	-0.00657725	0.102694	-0.969258	0.68336	0.220202	0.215592	-0.0812105	0.520866	0.129979	0.141953	-0.412033	0.686572	0.111504	0.0363226	-0.581875	0.560451	0.0596912	0.0905127	-0.209466	0.41938	0.128268	0.0895764	-0.259321	0.464398	-0.134766
4760	0.53808	0.530095	0.193896	0.831317	-0.1546	-0.127237	-0.620228	0.351869	0.341377	0.336795	-0.0547318	0.706868	0.45703	0.313816	-0.42038	0.641628	-0.231413	-0.219616	-0.663815	0.206541	-0.112677	-0.15018	-0.732602	0.208366	0.00567596	0.0650818	-0.665662	0.435317	0.219998	0.212822	-0.0753113	0.507029	0.143759	0.147408	-0.377567	0.696014	0.0792074	0.0249045	-0.564339	0.51474	0.0478462	0.0773402	-0.222287	0.419995	0.133154	0.0956137	-0.236927	0.444104	-0.11966
4800	0.537287	0.530532	0.203242	0.832594	-0.174346	-0.149802	-0.650873	0.335301	0.352319	0.341421	-0.0643948	0.72025	0.373916	0.2509	-0.454125	0.535742	-0.273709	-0.238544	-0.725297	0.286309	-0.0453635	-0.091724	-0.553954	0.187169	0.0785791	0.0763666	-0.41562	0.433238	0.22051	0.210458	-0.0631447	0.503334	0.158482	0.157129	-0.321054	0.713553	0.0503383	0.0145784	-0.534597	0.467847	0.0368365	0.0635278	-0.239262	0.403266	0.142854	0.110758	-0.198313	0.436371	-0.0926252
4840	0.536231	0.530539	0.203138	0.830116	-0.190214	-0.169561	-0.668414	0.295597	0.346955	0.335029	-0.0725654	0.721338	0.302202	0.194129	-0.458321	0.457358	-0.295609	-0.248702	-0.773524	0.339056	0.0266189	-0.0271583	-0.423294	0.183232	0.199974	0.149668	-0.721576	0.58081	0.22153	0.209804	-0.0595025	0.505008	0.171145	0.167861	-0.29542	0.703523	0.0284913	0.00680762	-0.492854	0.423375	0.0268601	0.0506089	-0.251156	0.390872	0.155261	0.13362	-0.150137	0.445366	-0.0570022
4880	0.5354	0.52855	0.205457	0.821966	-0.20044	-0.184452	-0.682238	0.278746	0.323561	0.316346	-0.0795705	0.708959	0.242561	0.151382	-0.451382	0.468678	-0.302273	-0.249398	-0.791738	0.382942	0.10022	0.0393647	-0.277625	0.235995	0.356112	0.281499	-0.912744	0.753848	0.221989	0.210846	-0.0513341	0.500505	0.179407	0.176852	-0.284858	0.702357	0.0172613	0.00700954	-0.458966	0.38619	0.0187769	0.0415574	-0.264653	0.394215	0.168269	0.154741	-0.109975	0.464536	-0.0161311
4920	0.53153	0.522851	0.202904	0.810333	-0.20561	-0.193495	-0.668179	0.263823	0.289095	0.286464	-0.0966788	0.647103	0.195665	0.123624	-0.42467	0.506238	-0.298862	-0.242923	-0.798935	0.433078	0.174005	0.106341	-0.196813	0.320515	0.533244	0.437647	-0.867536	1.00751	0.220821	0.21237	-0.0453032	0.497869	0.180929	0.181262	-0.261199	0.725616	0.0202433	0.0179522	-0.417842	0.39628	0.0152597	0.0377176	-0.282969	0.397106	0.179773	0.167698	-0.101991	0.488051	0.026648
[truncated: 402 more rows]
[truncated: 3 more columns]

## Sheet: Neotoma_ecogroup
.Taxa name (Neotoma)	.Taxa name (Simplified)	.Ecological group (Neotoma)
Abatia	Abatia	TRSH
Abies	Abies	TRSH
Abuta	Abuta	UPHE
Abuta racemosa	Abuta	TRSH
Abutilon	Abutilon	UPHE
Abutilon-type	Abutilon	UPHE
Acacia	Acacia	TRSH
Acacia sp.	Acacia	TRSH
Acacia/Inga	Acacia	TRSH
Acacia-type	Acacia	TRSH
Acaena	Acaena	UPHE
[truncated: 2,938 more rows]

## Sheet: ComparisonPRS|zscores
Age (yr BP)	PRS Amazonia	PRSBP Amazonia	Z-scores Amazonia	PRS NNEo	PRSBP NNEo	Z-scores Nneo	PRS TrAn	PRSBP TrAn	Z-scores TrAn	PRS CEB	PRSBP CEB	Z-scores CEB	PRS SESA	PRSBP SESA	Z-scores SESA	PRS ExTrAn	PRSBP ExTrAn	Z-scores ExTrAn
[truncated: 526 more rows]

[truncated: 2 more sheets: AP(%) RawData, Charcoal influx RawData]
