# Supplementary material for: Vegetation and fire regimes in the Neotropics over the last 21 000 years
Source: Copernicus journal article supplement (doi:10.5194/esd-16-1887-2025), 2025-10-29
Supplement: Supplementary file [file esd-16-1887-2025-supplement-title-page.pdf › esd-16-1887-2025-supplement-title-page.pdf]

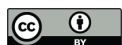

## *Supplement of*

# **Vegetation and fire regimes in the Neotropics over the last 21 000 years**

**Thomas Kenji Akabane et al.**

*Correspondence to:* Thomas Kenji Akabane ([thomask.akabane@gmail.com](mailto:thomask.akabane@gmail.com))

- [esd-16-1887-2025-supplement-title-page.pdf](#)
- [Supplementary material.pdf](#)
- [Table S1.xlsx](#)

The copyright of individual parts of the supplement might differ from the article licence.
